# Supplementary material for: Will it gel? Successful computational prediction of peptide gelators using physicochemical properties and molecular fingerprints
Source: PubMed Central journal article supplement (PMC6016447; doi:10.1039/c6sc00722h), 2016-04-13
Supplement: SC-007-C6SC00722H-s001.pdf [file SC-007-C6SC00722H-s001.pdf]

**Will it Gel? Successful Computational Prediction of Peptide Gelators using  
Physicochemical Properties and Molecular Fingerprints**

Jyoti Gupta, Dave J. Adams and Neil G. Berry

Department of Chemistry, University of Liverpool, Liverpool L69 7ZD U.K.

**SUPPORTING INFORMATION**

## Section 1

**Materials.** A number of the potential gelators have been previously reported (structures 1-25; Fig. S1; the structures of the commercially available Fmoc-amino acids (purchased from Sigma Aldrich and used as received) are also shown here (structures 26-31)).<sup>1-8</sup>

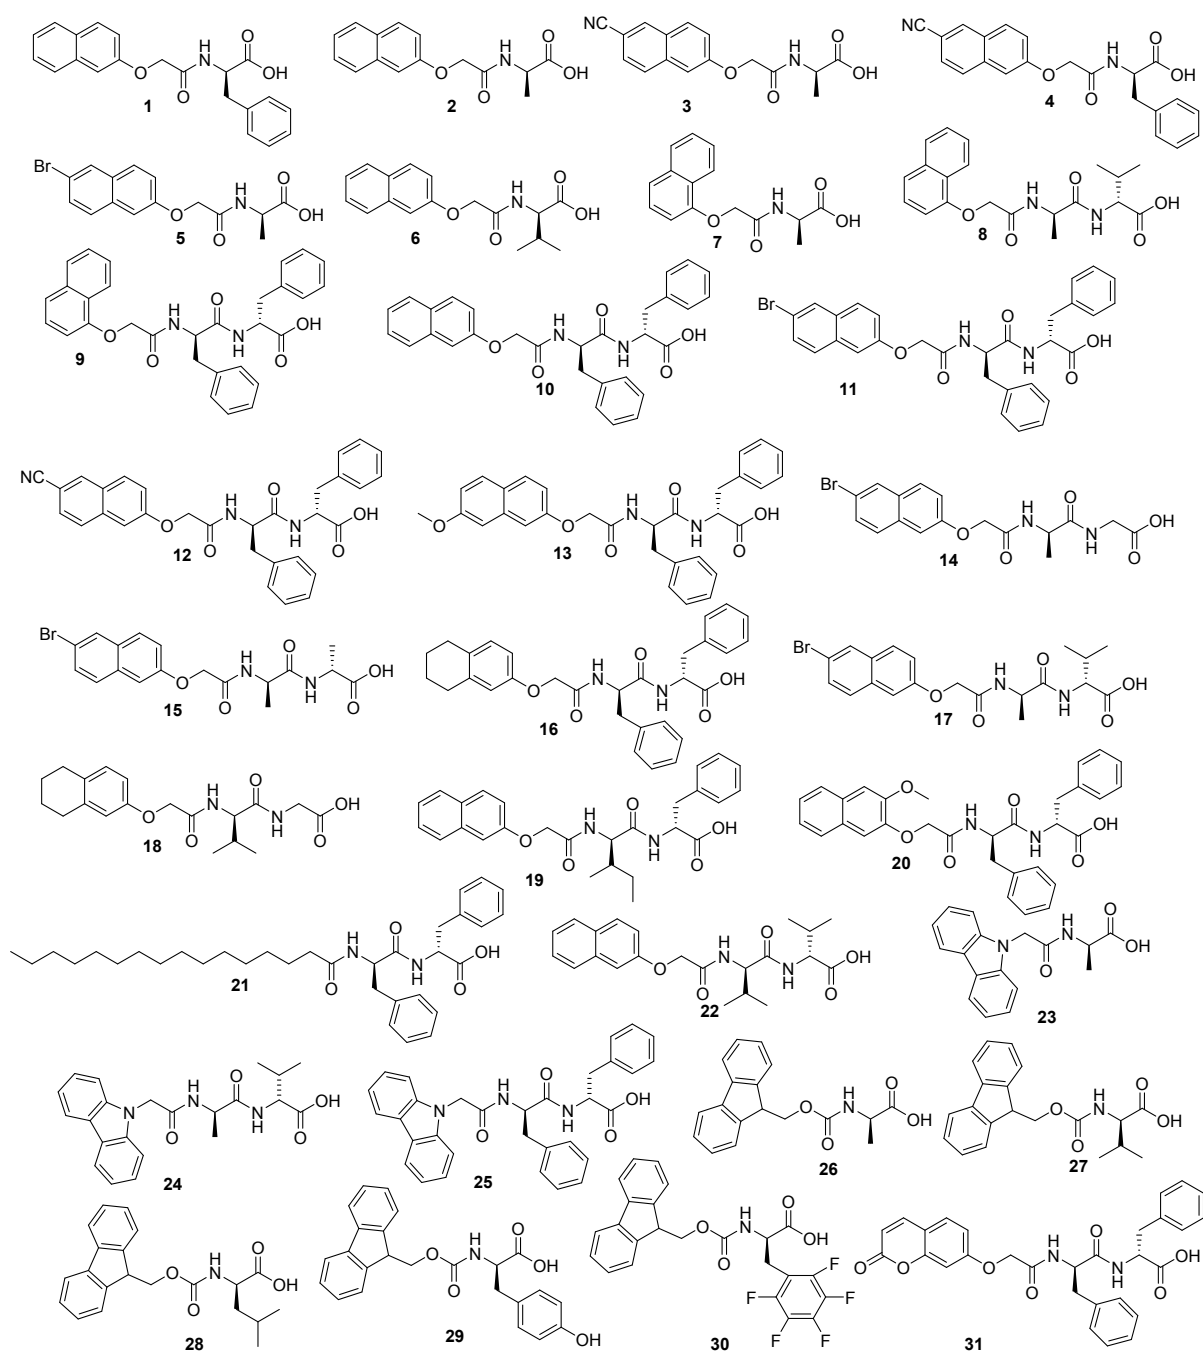

**Figure S1.** Previously reported LMWG 1-31.

The other gelators were prepared from the corresponding phenol or naphthol. These were reacted with tert-butylchloroformate and deprotected to give the starting carboxylic acid as

described elsewhere.<sup>1-3,5</sup> Yields were typically > 85 %. This was then coupled either sequentially with C-protected amino acids or with the required C-protected dipeptides in yields of 70 -90%. The C-terminus was then deprotected with lithium hydroxide as described previously to give the final products in yields of > 70%.<sup>1-3,5</sup> Where dipeptides were coupled, these were prepared with the C-terminus protected by methyl or ethyl esters by coupling Boc-protected amino acids with amino acids protected by methyl or ethyl esters, followed by deprotection of the N-terminus with trifluoroacetic acid following a literature procedure, generally providing the products in yields of > 80 %.<sup>9</sup> Because all of the procedures are analogous to those described previously, full experimental protocols are not provided. The characterisation of all intermediates and final tested materials is listed below. The materials tested are labelled with name and number, with the outcome of the gelation tests described below in Section 2.

### Characterisation for Dipeptides

**BocLLOMe:** <sup>1</sup>H NMR (CDCl<sub>3</sub>) 6.51 (d, NH, 1H,  $J_{HH} = 7.8$  Hz), 4.92 (d, NH, 1H,  $J_{HH} = 8.3$  Hz), 4.60 (dt, CHNH, 1H,  $J_{HH} = 9.1$  Hz,  $J_{HH} = 5.0$  Hz), 4.10 (m, CHNH, 1H), 3.72 (s, OCH<sub>3</sub>, 3H), 1.75 – 1.46 (m, CH<sub>2</sub> and CH, 6H), 1.44 (s, CH<sub>3</sub>, 9H), 0.92 (m, CH<sub>3</sub>, 12H) ppm. <sup>13</sup>C NMR (CDCl<sub>3</sub>) 173.8, 172.2, 155.7, 80.1, 69.8, 52.9, 50.6, 54.6, 50.8, 28.3, 24.7, 24.6, 22.1, 21.8, 18.8 ppm. MS (ES) 381 ([M+Na]<sup>+</sup>). Accurate mass calculated for C<sub>18</sub>H<sub>34</sub>N<sub>2</sub>O<sub>5</sub>Na: 381.2365. Found: 381.2374.

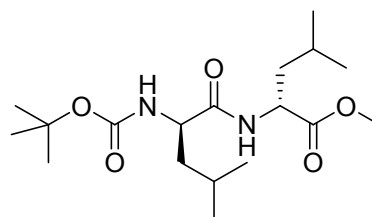

**LLOMe.TFA:** <sup>1</sup>H NMR (DMSO) 8.84 (d, NH, 1H,  $J_{HH} = 7.5$  Hz), 8.22 (bs, NH<sub>3</sub>, 3H), 4.34 (m, CHNH, 1H), 3.81 (m, CHNH, 1H), 3.63 (s, OCH<sub>3</sub>, 3H), 1.68 – 1.49 (m, CH and CH<sub>2</sub>, 6H), 0.91 (m, CH<sub>3</sub>, 12H) ppm. <sup>13</sup>C NMR (DMSO) 172.3, 169.2, 51.9, 50.6, 50.4, 23.9, 23.3, 22.7, 22.5, 21.9, 21.1 ppm. MS (ES) 259 ([M+H]<sup>+</sup>).

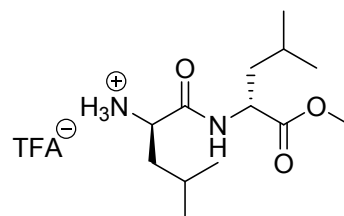

**BocIlelleOMe:** <sup>1</sup>H NMR (CDCl<sub>3</sub>) 6.38 (bd, NH, 1H,  $J_{HH} = 7.4$  Hz), 5.03 (m, NH, 1H), 4.56 (dd, CHNH, 1H,  $J_{HH} = 8.6$  Hz,  $J_{HH} = 4.9$  Hz), 3.94 (m, CHNH, 1H), 3.73 (s, OCH<sub>3</sub>, 3H), 1.90 (m, CH(CH<sub>3</sub>), 2H), 1.46 (m, CH<sub>2</sub> and CH<sub>3</sub>, 9H), 1.14 (m, CH<sub>2</sub>, 2H), 0.93 (m, CH<sub>3</sub>, 12H) ppm. <sup>13</sup>C NMR (CDCl<sub>3</sub>) 172.1, 171.4, 155.8, 79.9, 59.3, 56.4, 52.1, 37.8, 36.9, 28.3, 25.1, 24.8, 15.5, 15.4, 11.5, 11.4 ppm. MS (ES) 381 ([M+Na]<sup>+</sup>). Accurate mass calculated for C<sub>18</sub>H<sub>34</sub>N<sub>2</sub>O<sub>5</sub>Na: 381.2365. Found: 381.2372.

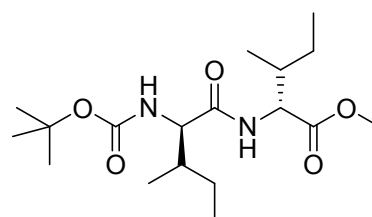

**IlelleOMe.TFA:** <sup>1</sup>H NMR (DMSO) 8.66 (d, NH, 1H,  $J_{HH} = 4.4$  Hz), 8.21 (bs, NH<sub>3</sub>, 3H), 4.24 (dd, CHNH, 1H,  $J_{HH} = 7.2$  Hz,  $J_{HH} = 6.2$  Hz), 3.77 (d, CHNH, 1H,  $J_{HH} = 5.9$  Hz), 3.63 (s, OCH<sub>3</sub>, 3H), 1.81 (m, CH, 2H), 1.45 (m, CH<sub>2</sub>, 2H), 1.12 (m, CH<sub>2</sub>, 2H), 0.88 (m, CH<sub>3</sub>, 12H) ppm. <sup>13</sup>C NMR (DMSO) 171.3, 168.3, 64.8, 56.7, 51.8, 36.2,

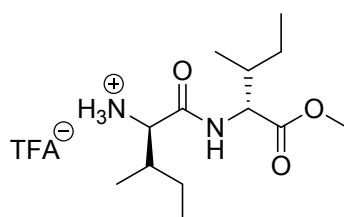

36.1, 24.7, 23.7, 15.3, 15.1, 11.1, 11.0 ppm. MS (ES) 259.2 ([M+H]<sup>+</sup>). Accurate mass calculated for C<sub>13</sub>H<sub>27</sub>N<sub>2</sub>O<sub>3</sub>: 259.2022. Found: 259.2027.

### Phenyl-protected Amino Acids and Dipeptides

**PhOLOMe:** <sup>1</sup>H NMR (CDCl<sub>3</sub>) 7.33 (t, ArH, 2H, *J*<sub>HH</sub> = 7.4 Hz), 7.06 (t, ArH, 1H, *J*<sub>HH</sub> = 7.4 Hz), 6.96 (d, ArH, 2H, *J*<sub>HH</sub> = 9.0 Hz), 6.89 (bd, NH, 1H, *J*<sub>HH</sub> = 7.9 Hz), 4.73 (m, CHNH, 1H), 4.53 (s, OCH<sub>2</sub>, 2H), 3.74 (s, OCH<sub>3</sub>, 3H), 1.67 – 1.55 (m, CH and CH<sub>2</sub>, 3H), 0.94 (d, CH<sub>3</sub>, 3H, *J*<sub>HH</sub> = 6.6 Hz), 0.92 (d, CH<sub>3</sub>, 3H, *J*<sub>HH</sub> = 6.6 Hz) ppm.

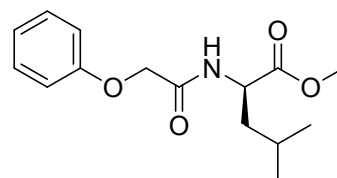

<sup>13</sup>C NMR (CDCl<sub>3</sub>) 172.9, 168.1, 157.2, 129.8, 122.2, 117.8, 67.3, 52.4, 50.2, 41.5, 24.8, 22.8, 21.9 ppm. MS 280 ([M+H]<sup>+</sup>). Accurate mass calculated for C<sub>15</sub>H<sub>21</sub>NO<sub>4</sub>: 280.1543. Found: 280.1545.

**PhOLOH (32):** <sup>1</sup>H NMR (DMSO) 8.27 (d, NH, 1H, *J*<sub>HH</sub> = 8.2 Hz), 7.29 (m, ArH, 2H), 6.98 (m, ArH, 3H), 4.55 (d, OCH, 1H, *J*<sub>HH</sub> = 14.7 Hz), 4.51 (d, OCH, 1H, *J*<sub>HH</sub> = 14.7 Hz), 4.31 (m, CHNH, 1H), 1.57 (m, CH and CH<sub>2</sub>, 3H), 0.88 (d, CH<sub>3</sub>, 3H, *J*<sub>HH</sub> = 6.1 Hz), 0.83 (d, CH<sub>3</sub>, 3H, *J*<sub>HH</sub> = 6.1 Hz) ppm.

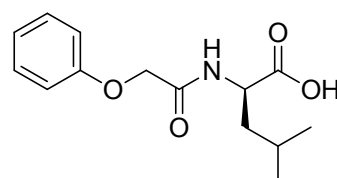

<sup>13</sup>C NMR (DMSO) 173.7, 167.7, 157.7, 129.4, 121.1, 114.7, 66.7, 49.9, 24.3, 22.9, 21.2 ppm. MS (CI) 266 ([M+H]<sup>+</sup>). Accurate mass calculated for C<sub>14</sub>H<sub>19</sub>NO<sub>4</sub>: 266.1387. Found: 266.1398.

**PhOLLMe:** <sup>1</sup>H NMR (CDCl<sub>3</sub>) 7.30 (m, ArH, 3H), 7.01 (t, ArH, 1H, *J*<sub>HH</sub> = 7.4 Hz), 6.92 (m, ARH and NH, 2H), 6.36 (d, NH, 1H, *J*<sub>HH</sub> = 8.1 Hz), 4.56 (m, OCH and CHNH, 3H), 4.49 (d, OCH, 1H, *J*<sub>HH</sub> = 15.0 Hz), 3.74 (s, OCH<sub>3</sub>, 3H), 1.59 (m, CH and CH<sub>2</sub>, 6H), 0.94 (m, CH<sub>3</sub>, 12H) ppm.

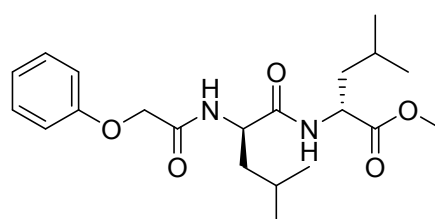

<sup>13</sup>C NMR (CDCl<sub>3</sub>) 173.1, 171.1, 168.4, 157.1, 129.8, 122.3, 114.7, 67.2, 52.3, 51.2, 50.8, 41.4, 40.8, 24.9, 24.7, 22.8, 22.7, 22.1, 21.9 ppm. MS (ES) 415 ([M+Na]<sup>+</sup>). Accurate mass calculated for C<sub>21</sub>H<sub>32</sub>N<sub>2</sub>O<sub>5</sub>Na: 415.2209. Found: 415.2218.

**PhOLLOH (33):** <sup>1</sup>H NMR (DMSO) 8.18 (d, NH, 1H, *J*<sub>HH</sub> = 7.9 Hz), 8.02 (d, NH, 1H, *J*<sub>HH</sub> = 8.5 Hz), 7.29 (m, ArH, 2H), 6.95 (m, ArH, 3H), 4.55 (dd, OCH, 1H, *J*<sub>HH</sub> = 14.7 Hz), 4.50 (d, OCH, 1H, *J*<sub>HH</sub> = 14.7 Hz), 4.44 (m, CHNH, 1H), 4.21 (m, CHNH, 1H), 1.51 (m, CH and CH<sub>2</sub>, 6H), 0.85 (m, CH<sub>3</sub>, 12H) ppm.

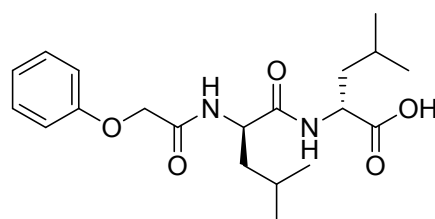

<sup>13</sup>C NMR (DMSO) 173.9, 171.7, 167.3, 157.7, 129.4, 121.1, 114.6, 66.6, 50.4, 50.1, 41.0, 24.2, 24.0, 23.1, 22.8, 21.6, 21.3 ppm. MS (ES) 401 ([M+Na]<sup>+</sup>). Accurate mass calculated for C<sub>20</sub>H<sub>30</sub>N<sub>2</sub>O<sub>5</sub>Na: 401.2052. Found: 401.2060.

**PhOIOMe:** <sup>1</sup>H NMR (CDCl<sub>3</sub>) 7.18 (bd, NH, 1H, *J*<sub>HH</sub> = 8.7 Hz), 7.07 (d, ArH, 1H, *J*<sub>HH</sub> = 7.9 Hz), 6.77 (d, ArH, 1H, *J*<sub>HH</sub> = 8.0 Hz), 6.60 (d, ArH, 1H, *J*<sub>HH</sub> = 8.0 Hz), 4.67 (dd, CHNH, 1H,

$J_{HH} = 8.9$  Hz,  $J_{HH} = 4.8$  Hz), 4.52 (OCH, 1H,  $J_{HH} = 14.8$  Hz), 4.48 (d, OCH, 1H,  $J_{HH} = 14.8$  Hz), 3.75 (s, OCH<sub>3</sub>, 3H), 2.74 (m, CH<sub>2</sub>, 4H), 1.95 (m, CH, 1H), 1.80 (m, CH<sub>2</sub>, 4H), 1.44 (m, CH, 1H), 1.15 (m, CH, 1H), 0.93 (m, CH<sub>3</sub>, 6H) ppm. <sup>13</sup>C NMR (CDCl<sub>3</sub>) 171.9, 168.1, 157.2, 129.8, 122.2, 114.8, 67.3, 56.0, 52.2, 37.9, 18.8, 15.4, 11.5 ppm. MS (CI) 334.2 ([M+H]<sup>+</sup>). Accurate mass calculated for C<sub>19</sub>H<sub>27</sub>NO<sub>4</sub>: 334.2013. Found: 334.2016.

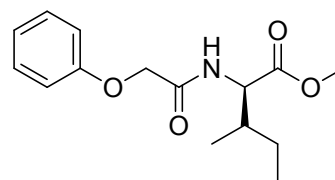

**PhOIOH (34):** <sup>1</sup>H NMR (DMSO) 8.06 (d, NH, 1H,  $J_{HH} = 8.5$  Hz), 7.29 (m, ArH, 2H), 6.96 (m, ArH, 3H), 4.61 (d, OCH, 1H,  $J_{HH} = 14.6$  Hz), 4.56 (d, OCH, 1H,  $J_{HH} = 14.6$  Hz), 4.25 (dd, CHNH, 1H,  $J_{HH} = 8.5$  Hz,  $J_{HH} = 5.9$  Hz), 1.84 (m, CH, 1H), 1.40 (m, CH, 1H), 1.12 (m, CH, 1H), 0.85 (m, CH<sub>3</sub>, 6H) ppm. <sup>13</sup>C NMR (DMSO) 172.7, 167.7, 157.7, 129.4, 121.1, 114.5, 66.4, 55.9, 36.3, 15.5, 11.2 ppm. MS (ES) 288 ([M+Na]<sup>+</sup>). Accurate mass calculated for C<sub>14</sub>H<sub>19</sub>NO<sub>4</sub>Na: 288.1212. Found: 288.1215.

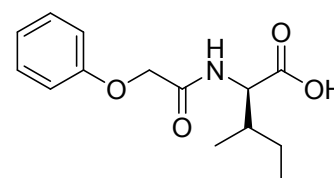

**PhOILOMe:** <sup>1</sup>H NMR (CDCl<sub>3</sub>) 7.31 (m, ArH, 2H), 7.09 (d, NH, 1H,  $J_{HH} = 8.5$  Hz), 7.02 (m, ArH, 1H), 6.93 (m, ArH, 2H), 6.11 (d, NH, 1H,  $J_{HH} = 8.0$  Hz), 4.60 (m, CHNH, 1H), 4.55 (d, OCH, 1H,  $J_{HH} = 15.0$  Hz), 4.50 (d, OCH, 1H,  $J_{HH} = 15.0$  Hz), 4.34 (dd, CHNH, 1H,  $J_{HH} = 8.9$  Hz,  $J_{HH} = 7.1$  Hz), 3.74 (s, OCH<sub>3</sub>, 3H), 1.90 (m, CH, 1H), 1.64 (m, CH<sub>2</sub>, 2H), 1.11 (m, CH, 1H), 0.91 (m, CH<sub>3</sub>, 12H) ppm. <sup>13</sup>C NMR (CDCl<sub>3</sub>) 172.9, 170.3, 168.3, 129.8, 129.7, 122.2, 114.7, 67.2, 57.2, 52.3, 50.8, 41.9, 41.4, 37.2, 24.9, 22.7, 21.9, 19.0, 15.3, 11.2 ppm. MS 415 ([M+Na]<sup>+</sup>). Accurate mass calculated for C<sub>21</sub>H<sub>32</sub>N<sub>2</sub>O<sub>5</sub>Na: 415.2209. Found: 415.2200.

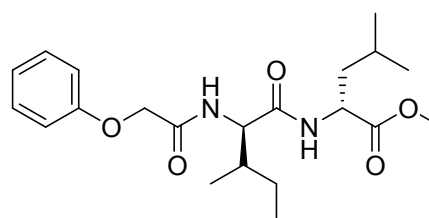

**PhOILOH (35):** <sup>1</sup>H NMR (DMSO) 8.27 (d, NH, 1H,  $J_{HH} = 7.8$  Hz), 7.84 (d, NH, 1H,  $J_{HH} = 9.1$  Hz), 7.29 (m, ArH, 2H), 6.94 (m, ArH, 2H), 4.58 (d, OCH, 1H,  $J_{HH} = 14.7$  Hz), 4.54 (d, OCH, 1H,  $J_{HH} = 14.7$  Hz), 4.31 (dd, CHNH, 1H,  $J_{HH} = 8.9$  Hz,  $J_{HH} = 7.3$  Hz), 4.20 (m, CHNH, 1H), 1.76 (m, CH, 1H), 1.60 (m, CH, 1H), 1.52 (m, CH, 2H), 1.41 (m, CH, 1H), 1.03 (m, CH, 1H), 0.84 (m, CH<sub>3</sub>, 12H) ppm. <sup>13</sup>C NMR (DMSO) 173.8, 170.7, 167.2, 157.6, 129.4, 121.1, 114.6, 66.5, 56.0, 50.2, 37.1, 24.2, 24.0, 22.8, 21.2, 15.2, 10.9 ppm. MS (ES) 401 ([M+Na]<sup>+</sup>). Accurate mass calculated for C<sub>20</sub>H<sub>30</sub>N<sub>2</sub>O<sub>5</sub>Na: 401.2052. Found: 401.2053.

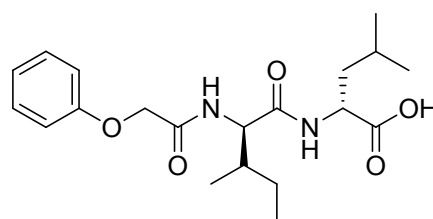

**PhOFOEt:** <sup>1</sup>H NMR (CDCl<sub>3</sub>) 7.24 (m, ArH, 5H), 7.00 (m, ArH, 4H), 6.86 (m, ArH and NH, 2H), 4.93 (m, CHNH, 1H), 4.49 (d, OCH, 1H,  $J_{HH} = 15.0$  Hz), 4.446 (d, OCH, 1H,  $J_{HH} = 15.0$  Hz), 4.16 (q, CH<sub>2</sub>, 2H,  $J_{HH} = 7.1$  Hz), 3.13 (d, CH<sub>2</sub>Ph, 2H,  $J_{HH} = 6.0$  Hz), 1.22 (t, CH<sub>3</sub>, 3H,  $J_{HH} = 7.1$  Hz) ppm. <sup>13</sup>C NMR (CDCl<sub>3</sub>) 170.9, 169.1,

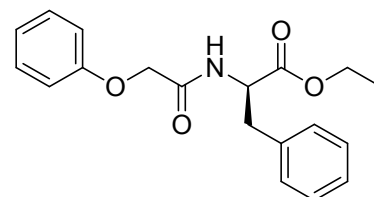

167.9, 157.2, 135.6, 130.1, 129.7, 129.5, 129.3, 128.7, 128.3, 127.2, 122.1, 114.7, 67.2, 61.6, 52.6, 38.0, 14.1 ppm. MS (ES) 350 ( $[M+Na]^+$ ). Accurate mass calculated for  $C_{19}H_{21}NO_4Na$ : 350.1368. Found: 350.1372.

**PhOFOH (36):**  $^1H$  NMR (DMSO) 8.25 (d, NH, 1H,  $J_{HH} = 8.2$  Hz), 7.21 (m, ArH, 7H), 6.95 (t, ArH, 1H,  $J_{HH} = 7.3$  Hz), 6.86 (m, ArH, 2H), 4.54 (m, CHNH and OCH, 2H), 4.44 (d, OCH, 1H,  $J_{HH} = 15.1$  Hz), 3.13 (dd, CHPh, 1H,  $J_{HH} = 13.8$  Hz,  $J_{HH} = 4.7$  Hz), 2.99 (dd, CHPh, 1H,  $J_{HH} = 13.8$  Hz,  $J_{HH} = 9.4$  Hz) ppm.  $^{13}C$  NMR (DMSO) 172.6, 167.6, 157.6, 137.4, 129.4, 129.1, 128.2, 126.4, 121.1, 114.6, 66.5, 52.9, 36.4 ppm. MS (ES) 322 ( $[M+Na]^+$ ). Accurate mass calculated for  $C_{17}H_{17}NO_4Na$ : 322.1055. Found: 322.1058.

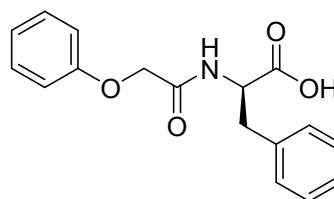

**PhOFLOMe:**  $^1H$  NMR ( $CDCl_3$ ) 7.26 (m, ArH, 4H), 7.20 (m, ArH, 2H), 7.12 (d, NH, 1H,  $J_{HH} = 7.8$  Hz), 7.02 (m, ArH, 1H), 6.86 (m, ArH, 2H), 6.08 (d, NH, 1H,  $J_{HH} = 7.9$  Hz), 4.73 (dd, CHNH, 1H,  $J_{HH} = 7.4$  Hz,  $J_{HH} = 7.2$  Hz), 4.53 (m, CHNH, 1H), 4.50 (d, OCH, 1H,  $J_{HH} = 15.0$  Hz), 4.45 (d, OCH, 1H,  $J_{HH} = 15.0$  Hz), 3.71 (s,  $OCH_3$ , 3H), 3.16 (dd, CHPh, 1H,  $J_{HH} = 13.8$  Hz,  $J_{HH} = 6.4$  Hz), 3.06 (dd, CHPh, 1H,  $J_{HH} = 13.8$  Hz,  $J_{HH} = 8.2$  Hz), 1.49 (m, CH and  $CH_2$ , 3H), 0.87 (m,  $CH_3$ , 6H) ppm.  $^{13}C$  NMR ( $CDCl_3$ ) 172.7, 169.9, 168.4, 157.1, 136.1, 129.8, 129.4, 128.7, 127.2, 122.2, 114.6, 37.2, 53.8, 52.3, 50.9, 41.4, 37.9, 24.8, 22.7, 21.9 ppm. MS (ES) 449 ( $[M+Na]^+$ ). Accurate mass calculated for  $C_{24}H_{30}N_2O_5Na$ : 449.2052. Found: 449.2050.

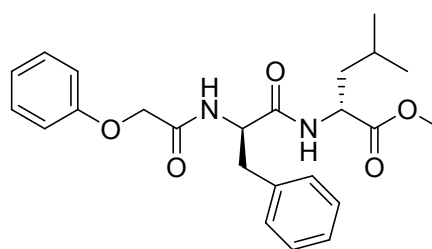

**PhOFLOH (37):**  $^1H$  NMR (DMSO) 8.36 (d, NH, 1H,  $J_{HH} = 7.9$  Hz), 8.07 (d, NH, 1H,  $J_{HH} = 8.6$  Hz), 7.23 (m, ArH, 7H), 6.95 (t, ArH, 1H,  $J_{HH} = 7.3$  Hz), 6.81 (dd, ArH, 2H,  $J_{HH} = 8.8$  Hz,  $J_{HH} = 1.0$  Hz), 4.66 (dt, CHNH, 1H,  $J_{HH} = 9.3$  Hz,  $J_{HH} = 4.0$  Hz), 4.43 (s,  $OCH_2$ , 2H), 4.26 (m, CHNH, 1H), 3.06 (dd, CHPh, 1H,  $J_{HH} = 13.8$  Hz,  $J_{HH} = 4.1$  Hz), 2.86 (dd, CHPh, 1H,  $J_{HH} = 13.8$  Hz,  $J_{HH} = 9.6$  Hz), 1.53 (m, CH and  $CH_2$ , 3H), 0.90 (d,  $CH_3$ , 3H,  $J_{HH} = 6.5$  Hz), 0.85 (d,  $CH_3$ , 3H,  $J_{HH} = 6.5$  Hz) ppm.  $^{13}C$  NMR (DMSO) 173.9, 170.8, 167.3, 157.7, 137.5, 129.4, 129.3, 127.9, 126.3, 121.1, 114.6, 66.5, 53.1, 50.3, 37.5, 24.2, 22.8, 21.3 ppm. MS (ES) 411 ( $[M-H]^-$ ). Accurate mass calculated for  $C_{23}H_{27}N_2O_5$ : 411.1920. Found: 411.1931.

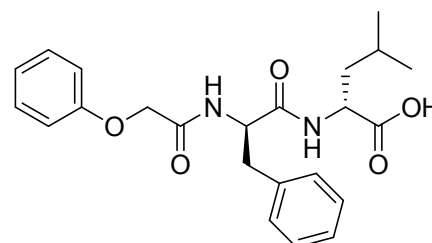

**6-MeONapO'Bu:**  $^1H$  NMR ( $CDCl_3$ ) 7.64 (d, ArH, 1H,  $^3J_{HH} = 8.9$  Hz), 7.59 (d, ArH, 1H,  $^3J_{HH} = 8.8$  Hz), 7.24 (s, ArH, 1H), 7.18 (dd, ArH, 1H,  $^3J_{HH} = 9.1$  Hz,  $^3J_{HH} = 2.6$  Hz), 7.09 (m, ArH, 2H), 4.58 (s,  $OCH_2$ , 2H), 3.88 (s,  $OCH_3$ , 3H), 1.49 (s,  $C(CH_3)_3$ , 9H) ppm.  $^{13}C$  NMR ( $CDCl_3$ ) 168.1, 156.5, 130.3, 129.6, 128.3, 128.2, 119.0, 118.9, 118.1, 107.9, 106.3, 82.2, 66.2, 55.3, 28.1 ppm. MS (CI) 306 ( $[M+NH_4]^+$ ). Analysis calculated for  $C_{17}H_{20}O_4$ : C, 70.81 %; H, 6.99 %. Found C, 70.81 %; H, 6.97 %.

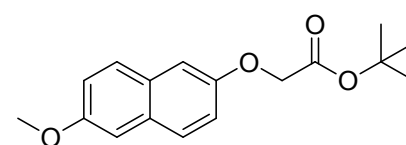

**6-MeONapOH:**  $^1\text{H}$  NMR (DMSO) 7.77 (d, ArH, 1H,  $^3J_{\text{HH}} = 8.9$  Hz), 7.71 (d, ArH, 1H,  $^3J_{\text{HH}} = 9.1$  Hz), 7.27 (d, ArH, 1H,  $^3J_{\text{HH}} = 2.6$  Hz), 7.23 (d, ArH, 1H,  $^3J_{\text{HH}} = 2.4$  Hz), 7.13 (dd, ArH, 1H,  $^3J_{\text{HH}} = 9.0$  Hz,  $^3J_{\text{HH}} = 2.4$  Hz), 4.76 (s, OCH<sub>2</sub>, 2H), 3.84 (s, OCH<sub>3</sub>, 3H) ppm.  $^{13}\text{C}$  NMR (DMSO) 170.2, 155.8, 154.0, 129.6, 129.1, 128.1, 118.8, 118.6, 107.3, 106.1, 64.6, 55.1 ppm. MS (CI) 250 ( $[\text{M}+\text{NH}_4]^+$ ). Analysis calculated for C<sub>13</sub>H<sub>12</sub>O<sub>4</sub>: C, 67.23 %; H, 5.21 %. Found C, 67.31 %; H, 5.24 %.

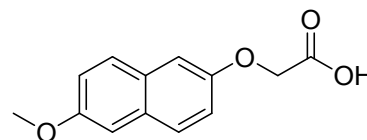

**6-MeONapAOEt:**  $^1\text{H}$  NMR (CDCl<sub>3</sub>) 7.68 (d, ArH, 1H,  $^3J_{\text{HH}} = 9.1$  Hz), 7.63 (d, ArH, 1H,  $^3J_{\text{HH}} = 8.9$  Hz), 7.13 (m, ArH and NH, 5H), 4.69 (t, CHNH, 1H,  $^3J_{\text{HH}} = 7.4$  Hz), 4.59 (s, OCH<sub>2</sub>, 2H), 4.21 (q, CH<sub>2</sub>CH<sub>3</sub>, 1H,  $^3J_{\text{HH}} = 7.4$  Hz), 3.89 (s, OCH<sub>3</sub>, 3H), 1.47 (d, CHCH<sub>3</sub>, 3H,  $^3J_{\text{HH}} = 7.4$  Hz), 1.27 (t, CH<sub>2</sub>CH<sub>3</sub>, 3H,  $^3J_{\text{HH}} = 7.4$  Hz) ppm.  $^{13}\text{C}$  NMR (CDCl<sub>3</sub>) 172.5, 167.9, 156.6, 153.6, 130.4, 129.4, 128.6, 128.4, 119.4, 118.5, 108.1, 106.0, 67.5, 61.6, 55.3, 47.8, 18.5, 14.1 ppm. MS (ES) 354 ( $[\text{M}+\text{Na}]^+$ ). Accurate mass calculated for C<sub>18</sub>H<sub>21</sub>NO<sub>5</sub>Na: 354.1317. Found: 354.1313.

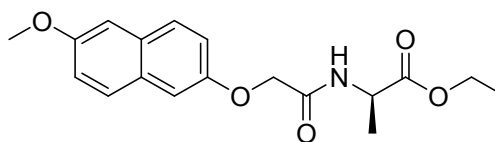

**6-MeONapAOH (38):**  $^1\text{H}$  NMR (DMSO) 8.41 (d, NH, 1H,  $^3J_{\text{HH}} = 7.5$  Hz), 7.76 (d, ArH, 1H,  $^3J_{\text{HH}} = 8.8$  Hz), 7.69 (d, ArH, 1H,  $^3J_{\text{HH}} = 9.0$  Hz), 7.25 (m, ArH, 2H), 7.22 (dd, ArH, 1H,  $^3J_{\text{HH}} = 8.9$  Hz,  $^3J_{\text{HH}} = 2.5$  Hz), 7.13 (dd, ArH, 1H,  $^3J_{\text{HH}} = 9.0$  Hz,  $^3J_{\text{HH}} = 2.5$  Hz), 4.59 (d, OCH<sub>2</sub>, 2H,  $^3J_{\text{HH}} = 2.3$  Hz), 4.35 (t, CHNH, 1H,  $^3J_{\text{HH}} = 7.0$  Hz), 3.84 (s, OCH<sub>3</sub>, 3H), 1.34 (d, CHCH<sub>3</sub>, 3H,  $^3J_{\text{HH}} = 7.3$  Hz) ppm.  $^{13}\text{C}$  NMR (DMSO) 173.8, 167.6, 155.8, 153.9, 129.7, 129.1, 128.2, 128.1, 118.8, 107.7, 106.1, 66.8, 55.1, 47.3, 17.0 ppm. MS (ES) 326 ( $[\text{M}+\text{Na}]^+$ ). Accurate mass calculated for C<sub>16</sub>H<sub>17</sub>NO<sub>5</sub>Na: 326.1004. Found: 326.1005.

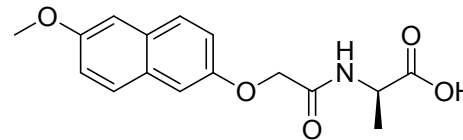

**2NapIIeIleOMe:**  $^1\text{H}$  NMR (CDCl<sub>3</sub>) 7.78 (m, ArH, 2H), 7.72 (d, ArH, 1H,  $J_{\text{HH}} = 8.2$  Hz), 7.45 (t, ArH, 1H,  $J_{\text{HH}} = 8.1$  Hz), 7.35 (t, ArH, 1H,  $J_{\text{HH}} = 6.9$  Hz), 7.20 (m, ArH and NH, 3H), 6.45 (d, NH, 1H,  $J_{\text{HH}} = 8.4$  Hz), 4.67 (d, OCH, 1H,  $J_{\text{HH}} = 14.9$  Hz), 4.62 (d, OCH, 1H,  $J_{\text{HH}} = 14.9$  Hz), 4.55 (dd, CHNH, 1H,  $J_{\text{HH}} = 8.4$  Hz,  $J_{\text{HH}} = 4.8$  Hz), 4.43 (dd, CHNH, 1H,  $J_{\text{HH}} = 4.4$  Hz),  $J_{\text{HH}} = 7.3$  Hz), 3.74 (s, OCH<sub>3</sub>, 3H), 1.87 (m, CH, 2H), 1.39 (m, CH<sub>2</sub>, 2H), 1.11 (m, CH<sub>2</sub>, 2H), 0.92 (m, CH<sub>3</sub>, 12H) ppm.  $^{13}\text{C}$  NMR (CDCl<sub>3</sub>) 172.0, 170.5, 168.1, 154.9, 134.3, 129.9, 129.5, 127.7, 126.9, 126.7, 124.7, 118.2, 17.6, 67.3, 57.3, 56.5, 52.1, 37.7, 37.3, 25.2, 24.9, 15.4, 15.3, 11.6, 11.2 ppm. MS (ES) 441 ( $[\text{M}-\text{H}]^-$ ). Accurate mass calculated for C<sub>25</sub>H<sub>33</sub>N<sub>2</sub>O<sub>5</sub>: 441.2389. Found: 441.2930.

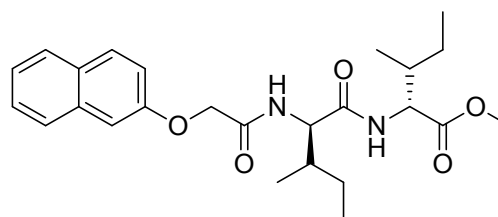

**2NapIIOH (39):**  $^1\text{H}$  NMR (DMSO) 8.16 (d, NH, 1H,  $J_{\text{HH}} = 8.0$  Hz), 8.00 (d, NH, 1H,  $J_{\text{HH}} = 9.0$  Hz), 7.84 (m, ArH, 2H), 7.74 (d, ArH, 1H,  $J_{\text{HH}} = 8.1$  Hz), 7.47 (t, ArH, 1H,  $J_{\text{HH}} = 6.9$  Hz), 7.34 (t, ArH, 1H,  $J_{\text{HH}} = 6.9$  Hz), 7.24 (m, ArH, 2H), 4.72 (d, OCH, 1H,  $J_{\text{HH}} = 14.7$  Hz),

4.67 (d, OCH, 1H,  $J_{HH} = 14.7$  Hz), 4.42 (m, CHNH, 1H), 4.16 (dd, CHNH, 1H,  $J_{HH} = 7.9$  Hz,  $J_{HH} = 6.2$  Hz), 1.76 (m, CH, 2H), 1.40 (m, CH, 2H), 1.11 (m, CH<sub>2</sub>, 1H), 0.83 (m, CH<sub>3</sub>, 12H) ppm.

<sup>13</sup>C NMR (DMSO) 172.7, 170.9, 167.1, 155.5, 133.9, 129.4, 128.7, 127.56, 126.6, 126.4, 123.8,

118.5, 107.2, 66.7, 56.4, 56.0, 37.0, 36.1, 24.7, 24.1, 15.4, 15.2, 11.2, 10.9 ppm. MS (ES) 451 ([M+Na]<sup>+</sup>). Accurate mass calculated for C<sub>24</sub>H<sub>32</sub>N<sub>2</sub>O<sub>5</sub>Na: 451.2209. Found: 451.2212.

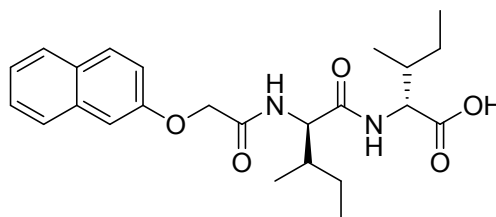

**2NapGFOEt:** <sup>1</sup>H NMR (CDCl<sub>3</sub>) 7.78 (d, ArH, 2H,  $J_{HH} = 8.8$  Hz), 7.73 (d, ArH, 1H,  $J_{HH} = 8.2$  Hz), 7.46 (dt, ArH, 1H,  $J_{HH} = 6.9$  Hz,  $J_{HH} = 1.2$  Hz), 7.35 (dt, ArH, 1H,  $J_{HH} = 6.9$  Hz,  $J_{HH} = 1.2$  Hz), 7.22 (m, ArH and NH, 5H), 7.13 (d, ArH,

1H,  $J_{HH} = 2.5$  Hz), 7.09 (m, ArH, 2H), 6.43 (d, NH, 1H,  $J_{HH} = 7.8$  Hz), 4.84 (dt, CHNH, 1H,  $J_{HH} = 5.9$  Hz,  $J_{HH} = 5.9$  Hz), 4.62 (s, OCH<sub>2</sub>, 2H), 4.16 (q, CH<sub>2</sub>, 2H,  $J_{HH} = 7.1$  Hz), 4.02 (d, CH<sub>2</sub>NH, 2H,  $J_{HH} = 5.5$  Hz), 3.13 (dd, CHPh, 1H,  $J_{HH} = 13.9$  Hz,  $J_{HH} = 5.9$  Hz), 3.07 (dd, CHPh, 1H,  $J_{HH} = 13.9$  Hz,  $J_{HH} = 5.9$  Hz), 1.24 (t, CH<sub>3</sub>, 3H,  $J_{HH} = 7.1$  Hz) ppm. <sup>13</sup>C NMR (CDCl<sub>3</sub>) 171.1, 168.7, 167.8, 154.9, 135.6, 134.2, 129.9, 129.5, 129.3, 128.6, 127.7, 127.2, 127.0, 126.8, 124.4, 118.2, 107.5, 69.8, 67.2, 61.7, 53.2, 42.6, 37.8, 14.1 ppm. MS (ES) 457 [M+Na]<sup>+</sup>. Accurate mass calculated for C<sub>25</sub>H<sub>26</sub>N<sub>2</sub>O<sub>5</sub>Na: 457.1739. Found: 457.1734.

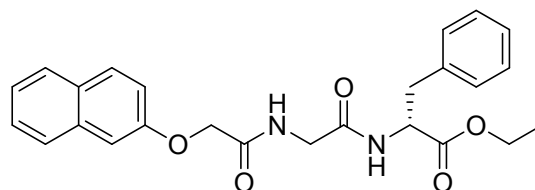

**2NapGFOH (40):** <sup>1</sup>H NMR (DMSO) 8.31 (t, NH, 1H,  $J_{HH} = 5.9$  Hz), 8.25 (d, NH, 1H,  $J_{HH} = 8.0$  Hz), 7.84 (m, ArH, 3H), 7.47 (dt, ArH, 1H,  $J_{HH} = 6.7$  Hz,  $J_{HH} = 1.2$  Hz), 7.37 (m, ArH, 2H), 7.23 (m, ArH, 6H), 4.64 (s, OCH<sub>2</sub>, 2H), 4.46 (m, CHNH,

1H), 3.87 (dd, CHNH, 1H,  $J_{HH} = 16.7$  Hz,  $J_{HH} = 6.0$  Hz), 3.74 (dd, CHNH, 1H,  $J_{HH} = 16.7$  Hz,  $J_{HH} = 5.7$  Hz), 3.06 (dd, CHPh, 1H,  $J_{HH} = 13.8$  Hz,  $J_{HH} = 5.1$  Hz), 2.88 (dd, CHPh, 1H,  $J_{HH} = 13.8$  Hz,  $J_{HH} = 8.9$  Hz) ppm. <sup>13</sup>C NMR (DMSO) 172.8, 168.5, 167.8, 155.5, 137.4, 134.0, 129.3, 129.1, 128.7, 128.2, 127.5, 126.8, 126.4, 123.9, 118.5, 107.4, 66.9, 53.5, 41.4, 36.8 ppm. MS (ES) 405 [M-H]<sup>-</sup>. Accurate mass calculated for C<sub>23</sub>H<sub>21</sub>N<sub>2</sub>O<sub>5</sub>: 405.1450. Found: 405.1450.

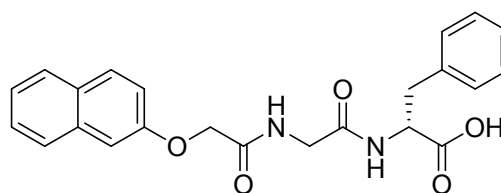

**2NapLOMe:** <sup>1</sup>H NMR (CDCl<sub>3</sub>) 7.78 (m, ArH, 2H), 7.74 (d, ArH, 1H,  $J_{HH} = 8.2$  Hz), 7.46 (t, ArH, 1H,  $J_{HH} = 6.9$  Hz), 7.36 (t, ArH, 1H,  $J_{HH} = 6.9$  Hz), 7.20 (dd, ArH, 1H,  $J_{HH} = 6.4$  Hz,  $J_{HH} = 2.6$  Hz), 7.16 (d, ArH, 1H,  $J_{HH} = 2.6$  Hz), 6.94 (bd, NH, 1H,  $J_{HH} = 8.6$  Hz), 4.76 (m, CHNH,

1H), 4.76 (s, OCH<sub>2</sub>, 2H), 3.72 (s, OCH<sub>3</sub>, 3H), 1.61 (m, CH and CH<sub>2</sub>, 3H), 0.93 (d, CH<sub>3</sub>, 3H,  $J_{HH} = 6.4$  Hz), 0.88 (d, CH<sub>3</sub>, 3H,  $J_{HH} = 6.3$  Hz) ppm. <sup>13</sup>C NMR (CDCl<sub>3</sub>) 172.9, 167.9, 155.0, 134.3, 129.9, 129.5, 127.7, 126.9, 126.7, 124.4, 118.2, 107.8, 67.4, 52.4, 50.3, 41.5, 24.8, 22.8, 21.8 ppm. MS (ES) 352 ([M+Na]<sup>+</sup>). Accurate mass calculated for C<sub>19</sub>H<sub>23</sub>NO<sub>4</sub>Na: 352.1525. Found: 352.1526.

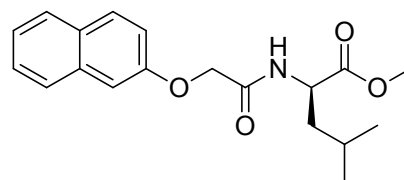



**2NapLOH (41):**  $^1\text{H}$  NMR (DMSO) 8.40 (d, NH, 1H,  $J_{\text{HH}} = 8.2$  Hz), 7.85 (dd, ArH, 1H,  $J_{\text{HH}} = 8.7$  Hz,  $J_{\text{HH}} = 2.5$  Hz), 7.75 (d, ArH, 2H,  $J_{\text{HH}} = 8.2$  Hz), 7.47 (t, ArH, 1H,  $J_{\text{HH}} = 7.0$  Hz), 7.37 (t, ArH, 1H,  $J_{\text{HH}} = 7.0$  Hz), 7.25 (m, ArH, 2H), 4.70 (d, OCH, 1H,  $J_{\text{HH}} = 14.7$  Hz), 4.65 (d, OCH, 1H,  $J_{\text{HH}} = 14.7$  Hz), 4.34 (m, CHNH, 1H), 1.62 (m, CH and  $\text{CH}_2$ , 3H), 0.86 (d,  $\text{CH}_3$ , 3H,  $J_{\text{HH}} = 6.0$  Hz), 0.82 (d,  $\text{CH}_3$ , 3H,  $J_{\text{HH}} = 6.0$  Hz) ppm.  $^{13}\text{C}$  NMR (DMSO) 173.8, 167.7, 155.6, 134.0, 129.2, 128.7, 127.5, 126.7, 126.4, 123.8, 118.7, 107.3, 66.7, 49.8, 24.3, 22.9, 21.1 ppm. MS (ES) 338 ( $[\text{M}+\text{Na}]^+$ ). Accurate mass calculated for  $\text{C}_{18}\text{H}_{21}\text{NO}_4\text{Na}$ : 338.1368. Found: 338.1376.

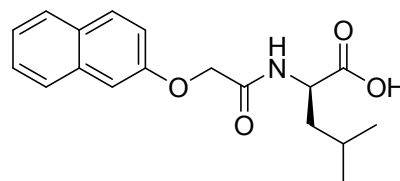

**2NapLGOEt:**  $^1\text{H}$  NMR ( $\text{CDCl}_3$ ) 7.79 (m, ArH, 2H), 7.73 (d, ArH, 1H,  $J_{\text{HH}} = 8.2$  Hz), 7.46 (t, ArH, 1H,  $J_{\text{HH}} = 6.9$  Hz), 7.36 (t, ArH, 1H,  $J_{\text{HH}} = 6.9$  Hz), 7.20 (dd, ArH, 1H,  $J_{\text{HH}} = 8.9$  Hz,  $J_{\text{HH}} = 2.6$  Hz), 7.14 (d, ArH, 1H,  $J_{\text{HH}} = 2.6$  Hz), 6.96 (bd, NH, 1H,  $J_{\text{HH}} = 8.4$  Hz), 6.60 (m, NH, 1H), 4.66 (s,  $\text{OCH}_2$ , 2H), 4.61 (m, CHNH, 1H), 4.20 (q,  $\text{CH}_2\text{CH}_3$ , 2H,  $J_{\text{HH}} = 8.2$  Hz), 3.98 (dd,  $\text{CH}_2\text{NH}$ , 2H,  $J_{\text{HH}} = 5.4$  Hz,  $J_{\text{HH}} = 1.6$  Hz), 1.78 – 1.54 (m, CH and  $\text{CH}_2$ , 3H), 1.28 (t,  $\text{CH}_3$ , 3H,  $J_{\text{HH}} = 7.1$  Hz), 0.91 (m,  $\text{CH}_3$ , 6H) ppm.  $^{13}\text{C}$  NMR ( $\text{CDCl}_3$ ) 171.6, 169.5, 168.5, 154.9, 134.2, 130.0, 129.5, 127.7, 126.9, 126.8, 124.4, 118.2, 107.6, 67.2, 61.6, 51.1, 41.3, 40.7, 24.6, 22.8, 21.9, 14.1 ppm. MS (ES) 423 ( $[\text{M}+\text{Na}]^+$ ). Accurate mass calculated for  $\text{C}_{22}\text{H}_{28}\text{N}_2\text{O}_5\text{Na}$ : 423.1896. Found: 423.1884.

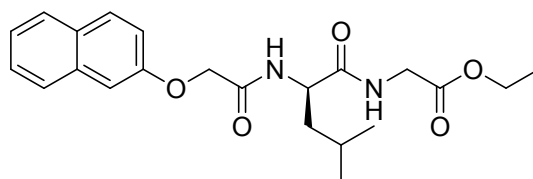

**2NapLGOH (42):**  $^1\text{H}$  NMR (DMSO) 8.35 (t, NH, 1H,  $J_{\text{HH}} = 5.8$  Hz), 8.21 (d, NH, 1H,  $J_{\text{HH}} = 8.6$  Hz), 7.84 (m, ArH, 1H), 7.75 (d, ArH, 1H,  $J_{\text{HH}} = 8.1$  Hz), 7.45 (t, ArH, 1H,  $J_{\text{HH}} = 6.9$  Hz), 7.27 (m, ArH, 2H), 4.68 (d, OCH, 1H,  $J_{\text{HH}} = 14.6$  Hz), 4.65 (d, OCH, 1H,  $J_{\text{HH}} = 14.6$  Hz), 4.46 (m, CHNH, 1H), 3.73 (m,  $\text{CH}_2\text{NH}$ , 2H), 1.53 (m, CH and  $\text{CH}_2$ , 2H), 0.84 (d,  $\text{CH}_3$ , 3H,  $J_{\text{HH}} = 6.2$  Hz), 0.80 (d,  $\text{CH}_3$ , 3H,  $J_{\text{HH}} = 6.2$  Hz) ppm.  $^{13}\text{C}$  NMR (DMSO) 172.1, 171.0, 167.3, 155.6, 133.9, 129.3, 128.7, 127.5, 126.6, 126.4, 123.7, 118.6, 107.2, 66.7, 50.4, 24.1, 23.0, 21.3 ppm. MS (ES) 395 ( $[\text{M}+\text{Na}]^+$ ). Accurate mass calculated for  $\text{C}_{20}\text{H}_{24}\text{N}_2\text{O}_5\text{Na}$ : 395.1583. Found: 395.1574.

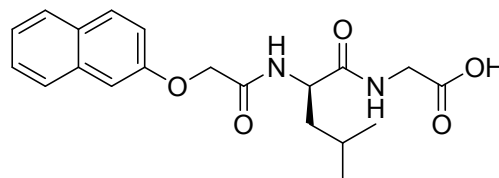

**BrNapLOMe:**  $^1\text{H}$  NMR ( $\text{CDCl}_3$ ) 7.94 (d, ArH, 1H,  $J_{\text{HH}} = 1.8$  Hz), 7.70 (d, ArH, 1H,  $J_{\text{HH}} = 0.1$  Hz), 7.61 (d, ArH, 1H,  $J_{\text{HH}} = 8.8$  Hz), 7.53 (dd, ArH, 1H,  $J_{\text{HH}} = 8.7$  Hz,  $J_{\text{HH}} = 1.8$  Hz), 7.24 (dd, ArH, 1H,  $J_{\text{HH}} = 8.8$  Hz,  $J_{\text{HH}} = 2.6$  Hz), 7.12 (d, ArH, 1H,  $J_{\text{HH}} = 2.6$  Hz), 6.92 (bd, NH, 1H,  $J_{\text{HH}} = 8.5$  Hz), 4.75 (m, CHNH, 1H), 4.64 (s,  $\text{OCH}_2$ , 2H), 3.73 (s,  $\text{OCH}_3$ , 3H), 1.56 (m, CH and  $\text{CH}_2$ , 3H), 0.92 (d,  $\text{CH}_3$ , 3H,  $J_{\text{HH}} = 6.3$  Hz), 0.89 (d,  $\text{CH}_3$ , 3H,  $J_{\text{HH}} = 6.3$  Hz) ppm.  $^{13}\text{C}$  NMR ( $\text{CDCl}_3$ ) 172.8, 167.5, 151.5, 132.9, 130.5, 129.5, 128.2, 126.3, 125.2, 114.6, 109.8, 68.8, 52.4, 50.5, 41.5, 24.9, 22.8, 21.9 ppm. MS (ES) 430 ( $[\text{M}+\text{Na}]^+$ ). Accurate mass calculated for  $\text{C}_{19}\text{H}_{22}\text{NO}_4\text{Na}^{79}\text{Br}$ : 430.0630. Found: 430.0635.

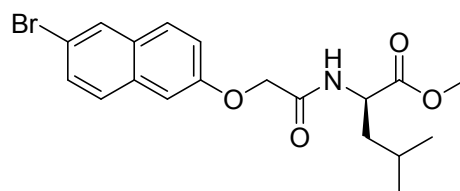

**BrNapLOH (43):**  $^1\text{H}$  NMR (DMSO) 8.40 (d, NH, 1H,  $J_{\text{HH}} = 8.2$  Hz), 7.13 (d, ArH, 1H,  $J_{\text{HH}} = 2.0$  Hz), 7.85 (d, ArH, 1H,  $J_{\text{HH}} = 9.7$  Hz), 7.72 (d, ArH, 1H,  $J_{\text{HH}} = 8.8$  Hz), 7.58 (dd, ArH, 1H,  $J_{\text{HH}} = 8.8$  Hz,  $J_{\text{HH}} = 2.0$  Hz), 7.30 (m, ArH, 2H), 4.69 (d, OCH, 1H,  $J_{\text{HH}} = 14.7$

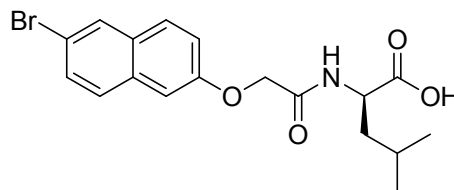

Hz), 4.65 (d, OCH, 1H,  $J_{\text{HH}} = 14.7$  Hz), 4.32 (m, CHNH, 1H), 1.56 (m, CH and  $\text{CH}_2$ , 3H), 0.86 (d,  $\text{CH}_3$ , 3H,  $J_{\text{HH}} = 6.1$  Hz), 0.81 (d,  $\text{CH}_3$ , 3H,  $J_{\text{HH}} = 6.1$  Hz) ppm.  $^{13}\text{C}$  NMR (DMSO) 173.8, 167.5, 156.0, 132.6, 129.9, 129.4, 129.3, 128.9, 128.6, 119.9, 116.5, 107.4, 66.7, 49.9, 24.3, 22.9, 21.4 ppm. MS (ES) 392 ( $[\text{M}-\text{H}]^-$ ). Accurate mass calculated for  $\text{C}_{18}\text{H}_{19}\text{NO}_4$ : 392.0497. Found: 392.0482.

**BrNapLGOEt:**  $^1\text{H}$  NMR ( $\text{CDCl}_3$ ) 7.92 (d, ArH, 1H,  $J_{\text{HH}} = 1.8$  Hz), 7.68 (d, ArH, 1H,  $J_{\text{HH}} = 9.1$  Hz), 7.59 (d, ArH, 1H,  $J_{\text{HH}} = 8.8$  Hz), 7.51 (dd, ArH, 1H,  $J_{\text{HH}} = 8.8$  Hz,  $J_{\text{HH}} = 1.8$  Hz), 7.21 (dd, ArH, 1H,  $J_{\text{HH}} = 8.9$  Hz,

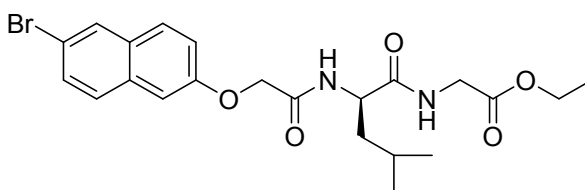

$J_{\text{HH}} = 2.6$  Hz), 7.10 (bd, NH, 1H,  $J_{\text{HH}} = 8.9$  Hz), 6.74 (t, NH, 1H,  $J_{\text{HH}} = 5.2$  Hz), 4.63 (m, CH and  $\text{OCH}_2$ , 3H), 4.20 (q,  $\text{CH}_2\text{CH}_3$ , 2H,  $J_{\text{HH}} = 7.1$  Hz), 4.02 (dd, CHNH, 1H,  $J_{\text{HH}} = 18.2$  Hz,  $J_{\text{HH}} = 5.4$  Hz), 3.98 (dd, CHNH, 1H,  $J_{\text{HH}} = 18.2$  Hz,  $J_{\text{HH}} = 5.4$  Hz), 1.74 (m, CH, 1H), 1.58 (m,  $\text{CH}_2$ , 2H), 1.28 (t,  $\text{CH}_3$ , 3H,  $J_{\text{HH}} = 7.1$  Hz), 0.92 (m,  $\text{CH}_3$ , 6H) ppm.  $^{13}\text{C}$  NMR ( $\text{CDCl}_3$ ) 171.9, 171.7, 168.7, 155.0, 132.7, 130.6, 130.1, 129.7, 129.1, 128.6, 119.2, 118.1, 107.7, 67.1, 51.1, 41.4, 41.2, 24.7, 22.8, 21.9 ppm. Accurate mass calculated for  $\text{C}_{22}\text{H}_{27}\text{N}_2\text{O}_5$ : 501.1001. Found: 501.1009.

**BrNapLGOH (44):**  $^1\text{H}$  NMR (DMSO) 8.35 (t, NH, 1H,  $J_{\text{HH}} = 5.9$  Hz), 8.22 (d, NH, 1H,  $J_{\text{HH}} = 8.9$  Hz), 8.13 (d, ArH, 1H,  $J_{\text{HH}} = 1.9$  Hz), 7.85 (d, ArH, 1H,  $J_{\text{HH}} = 9.7$  Hz), 7.73 (d, ArH, 1H,  $J_{\text{HH}} = 8.9$  Hz), 7.58 (dd, ArH, 1H,  $J_{\text{HH}} = 8.7$

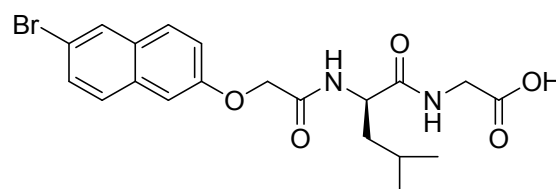

Hz,  $J_{\text{HH}} = 1.9$  Hz), 7.32 (m, ArH, 2H), 4.70 (d, OCH, 1H,  $J_{\text{HH}} = 14.6$  Hz), 4.65 (d, OCH, 1H,  $J_{\text{HH}} = 14.6$  Hz), 4.44 (m, CHNH, 1H), 3.77 (dd, CHNH, 1H,  $J_{\text{HH}} = 17.5$  Hz,  $J_{\text{HH}} = 5.9$  Hz), 3.72 (dd, CHNH, 1H,  $J_{\text{HH}} = 17.5$  Hz,  $J_{\text{HH}} = 5.9$  Hz), 1.54 (m, CH and  $\text{CH}_2$ , 3H), 0.84 (d,  $\text{CH}_3$ , 3H,  $J_{\text{HH}} = 6.2$  Hz), 0.80 (d,  $\text{CH}_3$ , 3H,  $J_{\text{HH}} = 6.1$  Hz) ppm.  $^{13}\text{C}$  NMR (DMSO) 172.1, 171.0, 167.2, 156.0, 132.6, 129.9, 129.4, 129.3, 128.8, 128.6, 119.8, 116.5, 107.3, 66.7, 50.4, 40.8, 24.1, 23.0, 21.3 ppm. MS (ES) 449 ( $[\text{M}-\text{H}]^-$ ). Accurate mass calculated for  $\text{C}_{20}\text{H}_{22}\text{N}_2\text{O}_5$ : 449.0712. Found: 449.0709.

**BrNapIFOEt:** 7.94 (d, ArH, 1H,  $J_{\text{HH}} = 1.8$  Hz), 7.70 (d, ArH, 1H,  $J_{\text{HH}} = 9.0$  Hz), 7.60 (d, ArH, 1H,  $J_{\text{HH}} = 8.8$  Hz), 7.53 (dd, ArH, 1H,  $J_{\text{HH}} = 8.8$  Hz,  $J_{\text{HH}} = 1.8$  Hz), 7.20 – 7.16 (m, ArH and NH, 5H), 7.09 (m, ArH, 4H), 6.32 (d, NH, 1H,  $J_{\text{HH}} = 7.9$  Hz), 4.83 (dt, CHNH, 1H,  $J_{\text{HH}} = 7.9$  Hz)  $J_{\text{HH}} = 6.1$  Hz), 4.62 d, OCH, 1H,  $J_{\text{HH}} = 14.9$  Hz), 4.55 (d, OCH,

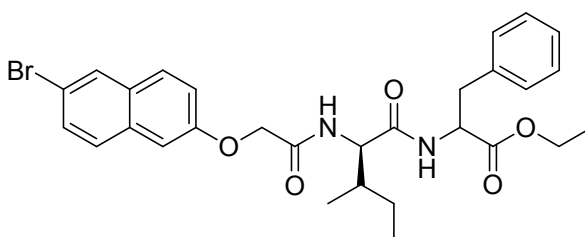

1H,  $J_{HH} = 14.9$  Hz), 4.34 (dd, CHNH, 1H,  $J_{HH} = 8.8$  Hz,  $J_{HH} = 6.9$  Hz), 4.17 (q, CH<sub>2</sub>, 2H,  $J_{HH} = 7.1$  Hz), 3.11 (dd, CHPh, 1H,  $J_{HH} = 13.9$  Hz,  $J_{HH} = 5.9$  Hz), 3.04 (dd, CHPh, 1H,  $J_{HH} = 13.9$  Hz,  $J_{HH} = 6.3$  Hz), 1.84 (m, CH, 1H), 1.40 (m, CH, 1H), 1.24 (t, CH<sub>3</sub>, 3H,  $J_{HH} = 7.1$  Hz), 1.01 (m, CH, 1H), 0.87 (d, CH<sub>3</sub>, 3H,  $J_{HH} = 6.8$  Hz), 0.81 (t, CH<sub>3</sub>, 3H,  $J_{HH} = 7.4$  Hz) ppm. <sup>13</sup>C NMR (CDCl<sub>3</sub>) 171.1, 170.1, 167.7, 155.2, 135.6, 132.7, 130.6, 130.1, 129.7, 129.3, 129.1, 128.6, 127.2, 119.3, 117.9, 107.6, 67.2, 61.6, 57.2, 53.1, 37.8, 37.1, 30.9, 24.8, 15.3, 14.1, 11.2 ppm. MS (ES) 591 ([M+Na]<sup>+</sup>). Accurate mass calculated for C<sub>29</sub>H<sub>33</sub>N<sub>2</sub>O<sub>5</sub>Na<sup>79</sup>Br: 591.1471. Found: 591.1472.

**BrNapIFOH (45):** <sup>1</sup>H NMR (DMSO) 8.38 (d, NH, 1H,  $J_{HH} = 7.8$  Hz), 8.12 (d, ArH, 1H,  $J_{HH} = 1.8$  Hz), 7.92 (d, ArH, 1H,  $J_{HH} = 9.2$  Hz), 7.88 (d, ArH, 1H,  $J_{HH} = 9.8$  Hz), 7.71 (d, ArH, 1H,  $J_{HH} = 8.8$  Hz), 7.57 (dd, ArH, 1H,  $J_{HH} = 8.8$  Hz,  $J_{HH} = 1.8$  Hz), 7.30 – 7.15 (m, ArH and

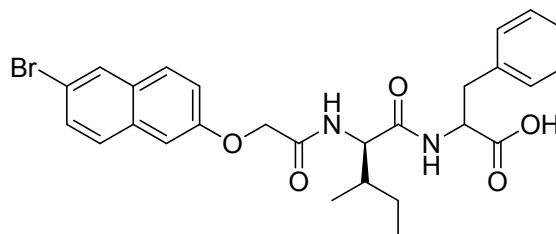

NH, 7H), 4.69 (d, OCH, 1H,  $J_{HH} = 14.6$  Hz), 4.64 (d, OCH, 1H,  $J_{HH} = 14.6$  Hz), 4.44 (m, CHNH, 1H), 4.31 (dd, CHNH, 1H,  $J_{HH} = 8.9$  Hz,  $J_{HH} = 7.4$  Hz), 3.04 (dd, CHPh, 1H,  $J_{HH} = 13.9$  Hz,  $J_{HH} = 5.3$  Hz), 2.88 (dd, CHPh, 1H,  $J_{HH} = 13.9$  Hz,  $J_{HH} = 9.2$  Hz), 1.73 (m, CH, 1H), 1.36 (m, CH, 1H), 1.00 (m, CH, 1H), 0.78 (m, CH<sub>3</sub>, 6H) ppm. <sup>13</sup>C NMR (CDCl<sub>3</sub>) 172.7, 170.7, 166.9, 155.9, 137.5, 132.6, 129.8, 129.4, 129.3, 129.0, 128.8, 128.7, 128.1, 126.3, 119.7, 116.5, 107.4, 66.7, 56.1, 53.3, 38.8, 36.9, 23.9, 15.2, 10.8 ppm. MS (ES) 539 ([M-H]<sup>-</sup>). Accurate mass calculated for C<sub>27</sub>H<sub>28</sub>N<sub>2</sub>O<sub>5</sub><sup>79</sup>Br: 539.1182. Found: 539.1187.

**1-Br-2Nap-O'Bu:** <sup>1</sup>H NMR (CDCl<sub>3</sub>) 8.23 (d, ArH, 1H,  $J_{HH} = 8.6$  Hz), 7.77 (m, ArH, 2H), 7.55 (m, ArH, 1H), 7.39 (m, ArH, 1H), 7.14 (d, ArH, 1H), 4.72 (s, OCH<sub>2</sub>, 2H), 1.48 (s, CH<sub>3</sub>, 9H) ppm. <sup>13</sup>C NMR (CDCl<sub>3</sub>) 167.7, 152.5, 133.2, 130.3, 128.8,

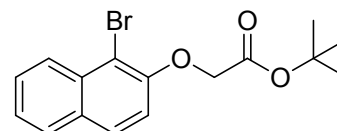

128.0, 127.8, 126.4, 124.8, 114.8, 109.9, 82.6, 67.4, 28.0 ppm. MS (ES) 359 ([M+Na]<sup>+</sup>). Accurate mass calculated for C<sub>16</sub>H<sub>17</sub>O<sub>3</sub>Na<sup>79</sup>Br: 359.0259. Found: 359.0250.

**1-Br-2Nap-OH:** <sup>1</sup>H NMR (DMSO) 8.11 (d, ArH, 1H,  $J_{HH} = 8.6$  Hz), 7.96 (d, ArH, 1H,  $J_{HH} = 9.0$  Hz), 7.96 (d, ArH, 1H,  $J_{HH} = 8.1$  Hz), 7.76 (dt, ArH, 1H,  $J_{HH} = 9.8$  Hz,  $J_{HH} = 1.2$  Hz), 7.48 (dt, ArH, 1H,  $J_{HH} = 6.9$  Hz,  $J_{HH} = 1.0$  Hz), 7.40 (d, ArH, 1H,  $J_{HH} = 9.1$  Hz),

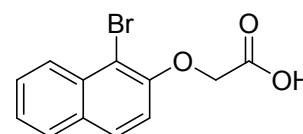

4.98 (s, OCH<sub>2</sub>, 2H) ppm. <sup>13</sup>C NMR (DMSO) 169.9, 152.4, 132.3, 129.85, 129.0, 128.3, 128.1, 125.2, 124.5, 114.7, 107.2, 65.5 ppm. MS (ES) 279 ([M-H]<sup>-</sup>). Accurate mass calculated for C<sub>12</sub>H<sub>8</sub>O<sub>3</sub><sup>79</sup>Br: 278.9657. Found: 278.9663.

**1-Br-2NapLOMe:** <sup>1</sup>H NMR (CDCl<sub>3</sub>) 8.22 (d, NH, 1H,  $J_{HH} = 8.6$  Hz), 7.84 (d, ArH, 1H,  $J_{HH} = 8.9$  Hz), 7.81 (d, ArH, 1H,  $J_{HH} = 8.2$  Hz), 7.60 (m, ArH, 1H), 7.45 (m, ArH, 1H), 7.20 (d, ArH, 1H,  $J_{HH} = 8.9$  Hz), 4.72 (m, OCH<sub>2</sub> and CHNH, 3H), 3.80 (s, OCH<sub>3</sub>, 3H), 1.65 (m, CH and CH<sub>2</sub>, 3H), 0.95 (m, CH<sub>3</sub>, 6H) ppm. <sup>13</sup>C NMR (CDCl<sub>3</sub>) 172.8, 167.5, 151.5, 132.9, 130.5, 129.5,

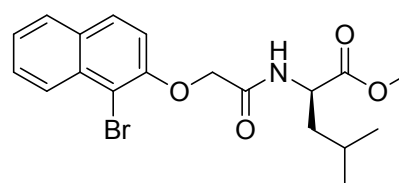

128.2, 128.1, 126.3, 125.1, 114.6, 109.8, 68.8, 52.4, 50.5, 41.5, 24.9, 22.8, 21.9 ppm. MS (ES) 430 ( $[M+Na]^+$ ). Accurate mass calculated for  $C_{19}H_{22}NO_4Na^{79}Br$ : 430.0630. Found: 430.0624.

**1-Br-2NapLOH:**  $^1H$  NMR (DMSO) 8.22 (d, NH, 1H,  $J_{HH}$  = 8.1 Hz), 8.09 (d, ArH, 1H,  $J_{HH}$  = 8.5 Hz), 7.96 (m, ArH, 2H), 7.64 (m, ArH, 1H), 7.50 (m, ArH, 1H), 7.41 (d, ArH, 1H,  $J_{HH}$  = 9.1 Hz), 4.86 (d, OCH, 1H,  $J_{HH}$  = 14.9 Hz), 4.80

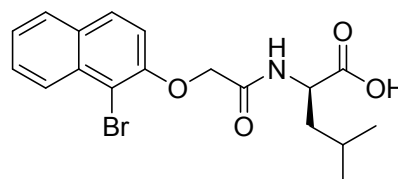

(d, OCH, 1H,  $J_{HH}$  = 14.9 Hz), 4.32 (m, CHNH, 1H), 1.60 (m, CH and  $CH_2$ , 3H), 0.89 (d,  $CH_3$ , 3H,  $J_{HH}$  = 6.2 Hz), 0.86 (d,  $CH_3$ , 3H,  $J_{HH}$  = 6.2 Hz) ppm.  $^{13}C$  NMR (DMSO) 173.6, 167.3, 152.4, 132.2, 129.7, 129.1, 128.3, 128.2, 125.3, 124.7, 115.4, 107.6, 68.0, 50.0, 24.3, 22.8, 21.3 ppm. MS (ES) 416 ( $[M+Na]^+$ ). Accurate mass calculated for  $C_{18}H_{20}NO_4Na^{79}Br$ : 416.0473. Found: 416.0471.

**1-Br-2NapLGOEt:**  $^1H$  NMR ( $CDCl_3$ ) 8.21 (d, NH, 1H,  $J_{HH}$  = 8.6 Hz), 7.83 (d, ArH, 1H,  $J_{HH}$  = 8.9 Hz), 7.80 (d, ArH, 1H,  $J_{HH}$  = 8.2 Hz), 7.60 (m, ArH, 1H), 7.45 (m, ArH, 1H), 7.19 (d, ArH, 1H), 6.72 (bt, NH, 1H,  $J_{HH}$  = 5.4 Hz), 4.73 (d,

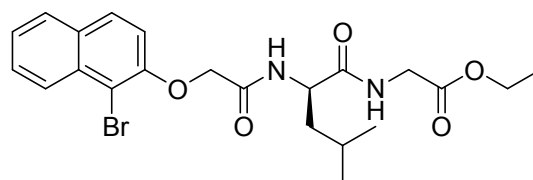

OCH, 1H,  $J_{HH}$  = 14.5 Hz), 4.69 (d, OCH, 1H,  $J_{HH}$  = 14.5 Hz), 4.61 (m, CHNH, 1H), 4.20 (q,  $CH_2$ , 2H,  $J_{HH}$  = 7.1 Hz), 4.04 (t,  $CH_2NH$ , 2H,  $J_{HH}$  = 5.4 Hz), 1.80 (m, CH, 1H), 1.68 (m,  $CH_2$ , 2H), 1.27 (t,  $CH_3$ , 3H,  $J_{HH}$  = 7.1 Hz), 0.97 (m,  $CH_3$ , 6H) ppm.  $^{13}C$  NMR ( $CDCl_3$ ) 171.6, 169.6, 168.1, 151.4, 132.9, 130.5, 129.5, 128.2, 126.3, 125.2, 114.7, 109.9, 68.9, 61.6, 51.4, 41.4, 40.7, 24.8, 22.9, 21.9, 19.0, 14.1 ppm. MS (ES) 501 ( $[M+Na]^+$ ). Accurate mass calculated for  $C_{22}H_{27}N_2O_5Ma^{79}Br$ : 501.1001. Found: 501.0993.

**1-Br-2NapLGOH (46):**  $^1H$  NMR (DMSO) 8.44 (t, NH, 1H,  $J_{HH}$  = 5.6 Hz), 8.11 (d, ArH, 1H,  $J_{HH}$  = 8.5 Hz), 8.06 (d, NH, 1H,  $J_{HH}$  = 8.7 Hz), 7.97 (d, ArH, 1H,  $J_{HH}$  = 9.0 Hz), 7.95 (d, ArH, 1H,  $J_{HH}$  = 8.2 Hz), 7.66 (m, ArH, 1H), 7.46 (m, ArH, 1H), 7.41 (d,

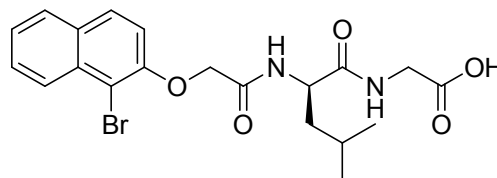

ArH, 1H,  $J_{HH}$  = 9.0 Hz), 4.84 (d, OCH, 1H,  $J_{HH}$  = 14.8 Hz), 4.80 (d, OCH, 1H,  $J_{HH}$  = 14.8 Hz), 4.46 (m, CHNH, 1H), 3.77 (t,  $CH_2NH$ , 2H), 4.54 (m, CH and  $CH_2$ ), 0.87 (m,  $CH_3$ , 6H) ppm.  $^{13}C$  NMR (DMSO) 171.9, 171.0, 166.9, 152.3, 132.2, 129.7, 129.2, 128.3, 128.2, 125.2, 124.6, 115.3, 107.6, 67.9, 50.4, 41.4, 25.1, 24.1, 23.0, 21.6 ppm. MS (ES) 473 ( $[M+Na]^+$ ). Accurate mass calculated for  $C_{20}H_{23}N_2O_5Ma^{79}Br$ : 473.0688. Found: 473.0685.

**1NapIOMe:**  $^1H$  NMR ( $CDCl_3$ ) 8.24 (m, ArH, 1H), 7.84 (m, ArH, 1H), 7.54 (m, ArH, 3H), 7.38 (t, ArH, 1H,  $J_{HH}$  = 8.1 Hz), 7.20 (bd, NH, 1H,  $J_{HH}$  = 8.6 Hz), 6.83 (d, ArH, 1H,  $J_{HH}$  = 7.6 Hz), 4.57 (d, OCH, 1H,  $J_{HH}$  = 14.9 Hz), 4.71 (m, OCH and CHNH, 2H), 3.75 (s,  $OCH_3$ , 3H), 1.95 (m, CH, 1H), 1.41 (m,  $CH_2$ , 1H), 1.11 (m,  $CH_2$ , 1H), 0.90 (m,  $CH_3$ , 6H) ppm.  $^{13}C$  NMR ( $CDCl_3$ ) 171.9, 168.0, 152.9, 134.6, 127.8, 126.7, 125.9, 125.7, 125.2, 121.9, 121.2, 105.8,

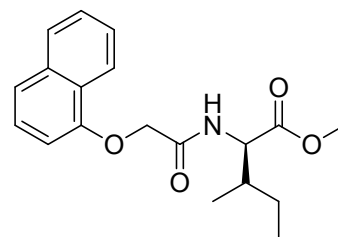

67.7, 56.1, 52.2, 37.9, 25.1, 15.5, 11.5 ppm. MS (CI) 330 ( $[M+H]^+$ ). Accurate mass calculated for  $C_{19}H_{23}NO_4$ : 330.1700. Found: 330.1708.

**1NapIOH (47):**  $^1H$  NMR (DMSO) 8.22 (m, ArH and NH, 2H), 7.90 (m, ArH, 1H), 7.51 (m, ArH, 3H), 7.40 (t, ArH, 1H,  $J_{HH} = 7.8$  Hz), 6.90 (d, ArH, 1H,  $J_{HH} = 7.1$  Hz), 4.83 (d, OCH, 1H,  $J_{HH} = 14.5$  Hz), 4.79 (d, OCH, 1H,  $J_{HH} = 14.5$  Hz), 4.31 (dd, CHNH, 1H,  $J_{HH} = 8.5$  Hz,  $J_{HH} = 5.8$  Hz), 1.87 (m, CH, 1H), 1.43 (m,  $CH_2$ , 1H), 1.19 (m,  $CH_2$ , 1H), 0.87 (m,  $CH_3$ , 6H) ppm.  $^{13}C$  NMR (DMSO) 172.7, 167.5, 153.3, 134.0, 127.5, 126.5, 125.9, 125.4, 124.8, 121.5, 120.5, 105.6,

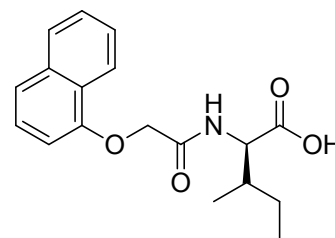

66.9, 55.9, 36.4, 24.6, 15.5, 11.2 ppm. MS (ES) 314 ( $[M-H]^-$ ). Accurate mass calculated for  $C_{18}H_{20}NO_4$ : 314.1392. Found: 314.1385.

**1NapIOMe:**  $^1H$  NMR ( $CDCl_3$ ) 8.23 (m, ArH, 1H), 7.82 (m, ArH, 1H), 7.51 (m, ArH, 3H), 7.34 (t, ArH, 1H,  $J_{HH} = 8.1$  Hz), 7.26 (m, NH, 1H), 6.81 (d, ArH, 1H,  $J_{HH} = 8.1$  Hz), 6.48 (bd, NH, 1H,  $J_{HH} = 8.4$  Hz), 4.75 (d, OCH, 1H,  $J_{HH} = 15.0$  Hz), 4.70 (d, OCH, 1H,  $J_{HH} = 15.0$  Hz), 4.58 (dd, CHNH, 1H,  $J_{HH} = 8.4$  Hz,  $J_{HH} = 4.8$  Hz), 4.46

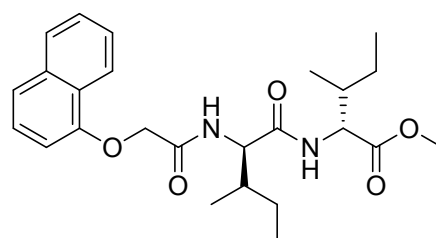

(dd, CHNH, 1H,  $J_{HH} = 8.7$  Hz,  $J_{HH} = 6.9$  Hz), 3.74 (s,  $OCH_3$ , 3H), 1.71 (m, CH, 2H), 1.43 (m,  $CH_2$ , 2H), 1.19 (m,  $CH_2$ , 2H), 0.91 (m,  $CH_3$ , 12H) ppm.  $^{13}C$  NMR ( $CDCl_3$ ) 172.2, 170.4, 168.3, 152.9, 134.7, 127.7, 126.8, 125.9, 125.6, 125.2, 121.9, 121.3, 105.7, 67.7, 57.3, 53.5, 52.1, 31.7, 27.4, 25.2, 24.9, 15.5, 15.3, 11.6, 11.2 ppm. MS (CI) 443 ( $[M+H]^+$ ). Accurate mass calculated for  $C_{25}H_{34}N_2O_5$ : 443.2540. Found: 443.2552.

**1NapIOH (48):**  $^1H$  NMR (DMSO) 8.21 (m, ArH, 1H), 8.16 (d, ArH, 1H,  $J_{HH} = 8.0$  Hz), 7.99 (d, ArH, 1H,  $J_{HH} = 9.0$  Hz), 7.89 (m, ArH, 1H), 7.52 (m, ArH and NH, 3H), 7.36 (t, ArH, 1H,  $J_{HH} = 7.9$  Hz), 6.89 (d, NH, 1H,  $J_{HH} = 7.6$  Hz), 4.79 (d, OCH, 1H,  $J_{HH} = 14.5$  Hz), 4.75 (d, OCH, 1H,  $J_{HH} = 14.5$  Hz), 4.44 9dd, CHNH, 1H,  $J_{HH} =$

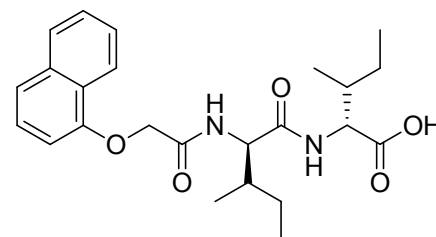

8.9 Hz,  $J_{HH} = 7.3$  Hz), 4.17 (dd, CHNH, 1H,  $J_{HH} = 7.9$  Hz,  $J_{HH} = 6.1$  Hz), 1.77 (m, CH, 2H), 1.45 (m, CH, 2H), 1.19 (m, CH, 1H), 1.00 (m, CH, 1H), 0.85 (m,  $CH_3$ , 12H) ppm.  $^{13}C$  NMR (DMSO) 172.6, 170.9, 167.1, 153.4, 127.5, 126.5, 125.9, 125.4, 121.4, 120.6, 105.6, 67.1, 56.4, 55.9, 37.2, 36.1, 24.7, 24.1, 15.5, 15.2, 11.2, 10.9 ppm. MS (ES) 427 ( $[M-H]^-$ ). Accurate mass calculated for  $C_{24}H_{31}N_2O_5$ : 427.2233. Found: 427.2227.

**1NapLLOMe:**  $^1H$  NMR ( $CDCl_3$ ) 8.22 (m, ArH, 1H), 7.82 (m, ArH, 1H), 7.52 (m, ArH, 3H), 7.35 (t, ArH, 1H,  $J_{HH} = 8.1$  Hz), 7.03 (d, NH, 1H,  $J_{HH} = 8.4$  Hz), 6.80 (d, ArH, 1H,  $J_{HH} = 7.6$  Hz), 6.46 (bd, NH, 1H,  $J_{HH} = 8.1$  Hz), 4.73 (d, OCH, 1H,  $J_{HH} = 15.1$  Hz), 4.69 (d, OCH, 1H,  $J_{HH} = 15.1$  Hz), 4.60 (m, CHNH, 2H), 3.74 (s,  $OCH_3$ , 3H), 1.61 (m, CH and  $CH_2$ , 6H), 0.91 (m,  $CH_3$ , 12H) ppm.  $^{13}C$  NMR ( $CDCl_3$ ) 173.1,

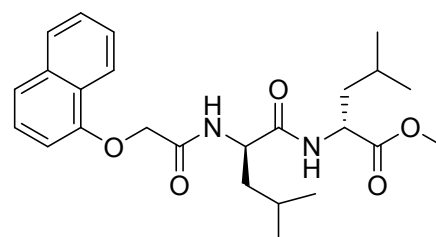

171.2, 168.4, 152.9, 134.6, 127.8, 126.8, 125.9, 125.6, 125.2, 122.0, 121.3, 105.7, 67.7, 52.3, 51.3, 50.8, 41.4, 41.0, 24.9, 24.7, 22.9, 22.8, 22.1, 21.9 ppm. MS (CI) 443 ([M+H]<sup>+</sup>). Accurate mass calculated for C<sub>25</sub>H<sub>34</sub>N<sub>2</sub>O<sub>5</sub>: 443.2540. Found: 443.2557.

**1NapLLOH (49):** <sup>1</sup>H NMR (DMSO) 8.23 (m, ArH, 2H), 8.14 (d, ArH, 1H, *J*<sub>HH</sub> = 8.6 Hz), 7.88 (m, ArH and NH, 3H), 7.38 (t, ArH, 1H, *J*<sub>HH</sub> = 8.0 Hz), 6.88 (d, NH, 1H, *J*<sub>HH</sub> = 7.6 Hz), 4.76 (d, OCH, 1H, *J*<sub>HH</sub> = 14.7 Hz), 4.72 (d, OCH, 1H, *J*<sub>HH</sub> = 14.7 Hz), 4.48 (m, CHNH, 1H), 4.23 (m, CHNH, 1H), 4.62 – 1.49 (m, CH and CH<sub>2</sub>, 6H), 0.85 (m, CH<sub>3</sub>, 12H) ppm. <sup>13</sup>C NMR (DMSO) 173.8, 171.7, 167.1, 153.2, 134.0, 127.4, 126.5, 125.9, 125.4, 124.7, 121.6, 120.6, 105.6, 67.1, 50.4, 50.1, 40.1, 24.2, 24.1, 23.1, 22.8, 22.8, 21.6, 21.2 ppm. MS (ES) 427 ([M-H]<sup>-</sup>). Accurate mass calculated for C<sub>24</sub>H<sub>31</sub>N<sub>2</sub>O<sub>5</sub>: 427.2233. Found: 427.2247.

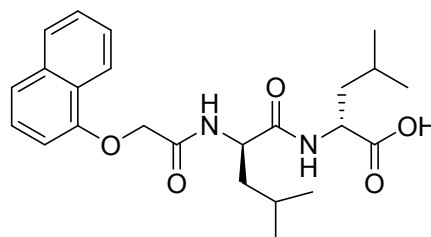

**1NapIFOEt:** <sup>1</sup>H NMR (CDCl<sub>3</sub>) 8.23 (m, ArH, 1H), 7.84 (m, ArH, 1H), 7.53 (m, ArH, 3H), 7.35 (t, ArH, 1H, *J*<sub>HH</sub> = 7.8 Hz), 7.25 – 7.13 (m, ArH and NH, 4H), 7.08 (m, ArH, 2H), 6.80 (d, ArH, 1H, *J*<sub>HH</sub> = 7.6 Hz), 6.27 (d, NH, 1H, *J*<sub>HH</sub> = 8.0 Hz), 4.86 (m, CHNH, 1H), 4.72 (d, OCH, 1H, *J*<sub>HH</sub> = 14.9 Hz), 4.66 (d, OCH, 1H, *J*<sub>HH</sub> = 14.9 Hz), 4.37 (dd, CHNH, 1H, *J*<sub>HH</sub> = 8.8 Hz, *J*<sub>HH</sub> = 6.6 Hz), 4.18 (q, CH<sub>2</sub>, 2H, *J*<sub>HH</sub> = 7.2 Hz), 3.14 (dd, CHPh, 1H, *J*<sub>HH</sub> = 13.9 Hz, *J*<sub>HH</sub> = 5.6 Hz), 3.04 (dd, CHPh, 1H, *J*<sub>HH</sub> = 13.9 Hz, *J*<sub>HH</sub> = 6.4 Hz), 1.87 (m, CH, 1H), 1.35 (m, CH<sub>2</sub>, 1H), 1.23 (t, CH<sub>3</sub>, 3H, *J*<sub>HH</sub> = 7.2 Hz), 0.91 (m, CH<sub>2</sub>, 1H), 0.88 (d, CH<sub>3</sub>, 3H, *J*<sub>HH</sub> = 6.8 Hz), 0.81 (t, CH<sub>3</sub>, 3H, *J*<sub>HH</sub> = 7.3 Hz) ppm. <sup>13</sup>C NMR (CDCl<sub>3</sub>) 171.1, 170.1, 168.2, 152.9, 135.6, 134.7, 129.3, 128.6, 127.8, 127.2, 126.8, 126.0, 125.6, 125.2, 121.9, 121.3, 105.6, 67.6, 61.6, 57.2, 53.0, 37.9, 37.2, 24.8, 15.3, 14.1, 11.2 ppm. MS (ES) 513 ([M+Na]<sup>+</sup>). Accurate mass calculated for C<sub>29</sub>H<sub>34</sub>N<sub>2</sub>O<sub>5</sub>Na: 513.2365. Found: 513.2357.

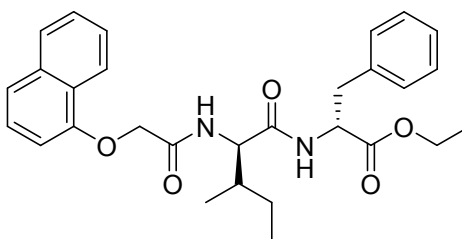

**1NapIFOH (50):** <sup>1</sup>H NMR (DMSO) 8.38 (d, NH, 1H, *J*<sub>HH</sub> = 7.9 Hz), 8.20 (m, NH, 1H), 7.87 (m, ArH, 2H), 7.52 (m, ArH, 3H), 7.23 – 7.16 (m, ArH, 5H), 6.88 (d, ArH, 1H, *J*<sub>HH</sub> = 7.7 Hz), 4.77 (d, OCH, 1H, *J*<sub>HH</sub> = 14.5 Hz), 4.72 (d, OCH, 1H, *J*<sub>HH</sub> = 14.5 Hz), 4.46 (m, CHNH, 1H), 4.33 (m, CHNH, 1H), 3.06 (dd, CHPh, 1H, *J*<sub>HH</sub> = 14.0 Hz, *J*<sub>HH</sub> = 5.2 Hz), 2.89 (dd, CHPh, 1H, *J*<sub>HH</sub> = 14.0 Hz, *J*<sub>HH</sub> = 9.3 Hz), 1.78 (m, CH, 1H), 1.36 (m, CH<sub>2</sub>, 1H), 0.98 (m, CH<sub>2</sub>, 1H), 0.80 (m, CH<sub>3</sub>, 6H) ppm. <sup>13</sup>C NMR (DMSO) 172.7, 170.6, 167.0, 153.1, 137.5, 134.0, 129.0, 128.1, 127.5, 126.5, 126.3, 125.9, 125.4, 121.4, 120.6, 105.7, 67.0, 56.1, 52.5, 52.3, 36.6, 36.5, 23.9, 15.2, 10.9 ppm. MS (EI) 485 [M+Na]<sup>+</sup>. Accurate mass calculated for C<sub>27</sub>H<sub>30</sub>N<sub>2</sub>O<sub>5</sub>Na: 485.2052. Found: 485.2050.

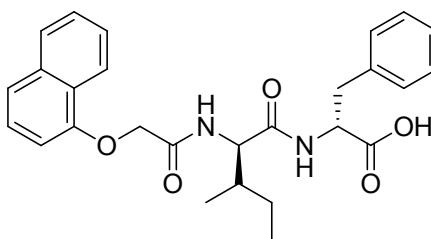

**1NapGLOMe:** (CDCl<sub>3</sub>) 8.27 (m, ArH, 1H), 7.82 (m, ArH, 1H), 7.52 (m, ArH, 3H), 7.37 (m, ArH and NH,

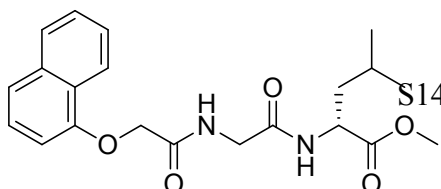

2H), 6.81 (d, ArH, 1H,  $J_{HH} = 7.5$  Hz), 6.36 (d, NH, 1H,  $J_{HH} = 8.1$  Hz), 4.75 (s, OCH<sub>2</sub>, 2H), 4.64 (m, CHNH, 1H), 4.10 (d, CH<sub>2</sub>NH, 2H,  $J_{HH} = 5.4$  Hz), 3.74 (2, OCH<sub>3</sub>, 3H), 1.62 (m, CH and CH<sub>2</sub>, 3H), 0.93 (m, CH<sub>3</sub>, 6H) ppm. <sup>13</sup>C NMR (CDCl<sub>3</sub>) 173.1, 168.9, 168.1, 152.9, 134.6, 127.7, 126.8, 125.9, 125.6, 125.2, 121.9, 121.5, 105.5, 67.6, 52.4, 50.8, 42.7, 41.5, 24.9, 22.8, 21.9 ppm. MS (CI) 387 ([M+H]<sup>+</sup>). Accurate mass calculated for C<sub>21</sub>H<sub>26</sub>N<sub>2</sub>O<sub>5</sub>: 387.1914. Found: 387.1925.

**1NapGLOH (51):** (DMSO) 8.38 (m, ArH, 1H), 8.31 (t, NH, 1H,  $J_{HH} = 5.7$  Hz), 8.18 (d, NH, 1H,  $J_{HH} = 8.0$  Hz), 7.89 (m, ArH, 1H), 7.53 (m, ArH, 3H), 7.41 (t, ArH, 1H,  $J_{HH} = 7.8$  Hz), 6.96 (d, ArH, 1H,  $J_{HH} = 7.2$  Hz), 4.73 (s, OCH<sub>2</sub>, 2H), 4.27 (m, CHNH, 1H), 3.90 (dd, CHNH, 1H,  $J_{HH} = 16.7$  Hz,  $J_{HH} = 5.8$  Hz), 3.85 (dd, CHNH, 1H,  $J_{HH} = 16.7$  Hz,  $J_{HH} = 5.8$  Hz), 1.63 (m, CH, 1H), 1.53 (m, CH<sub>2</sub>, 2H), 0.89 (d, CH<sub>3</sub>, 3H,  $J_{HH} = 6.5$  Hz), 0.85 (d, CH<sub>3</sub>, 3H,  $J_{HH} = 6.5$  Hz) ppm. <sup>13</sup>C NMR (DMSO) 173.9, 168.5, 167.7, 153.1, 134.0, 127.4, 126.5, 126.1, 125.3, 124.7, 121.9, 120.7, 105.7, 67.2, 50.2, 41.4, 24.2, 22.8, 21.3 ppm. MS (ES) 371 ([M-H]<sup>-</sup>). Accurate mass calculated for C<sub>20</sub>H<sub>23</sub>N<sub>2</sub>O<sub>5</sub>: 371.1607. Found: 371.1606.

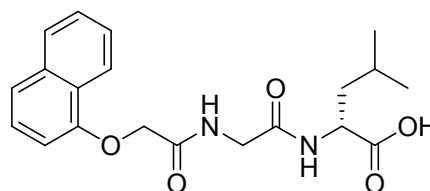

**4-Cl-1-NapO'Bu:** <sup>1</sup>H NMR (CDCl<sub>3</sub>) 8.38 (d, ArH, 1H,  $J_{HH} = 8.4$  Hz), 8.19 (d, ArH, 1H,  $J_{HH} = 8.3$  Hz), 7.61 (t, ArH, 1H,  $J_{HH} = 6.9$  Hz), 7.55 (t, ArH, 1H,  $J_{HH} = 6.9$  Hz), 7.41 (d, ArH, 1H,  $J_{HH} = 8.2$  Hz), 6.60 (d, ArH, 1H,  $J_{HH} = 8.2$  Hz), 4.67 (s, OCH<sub>2</sub>, 2H), 1.52 (s, CH<sub>3</sub>, 9H) ppm. <sup>13</sup>C NMR (CDCl<sub>3</sub>) 167.6, 152.9, 131.4, 127.7, 126.2, 125.4, 124.1, 122.7, 104.9, 82.2, 66.1, 28.9 ppm. MS (ES) 315 ([M+Na]<sup>+</sup>). Accurate mass calculated for C<sub>16</sub>H<sub>17</sub>O<sub>3</sub>Na<sup>35</sup>Cl: 315.0764. Found: 315.0755.

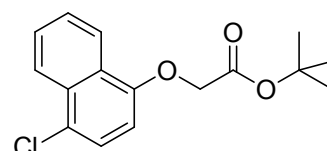

**4-Cl-1-NapOH:** <sup>1</sup>H NMR (DMSO) 8.31 (d, ArH, 1H,  $J_{HH} = 7.7$  Hz), 8.12 (d, ArH, 1H,  $J_{HH} = 8.0$  Hz), 7.72 (t, ArH, 1H,  $J_{HH} = 6.9$  Hz), 7.65 (t, ArH, 1H,  $J_{HH} = 6.9$  Hz), 7.58 (d, ArH, 1H,  $J_{HH} = 8.3$  Hz), 6.91 (d, ArH, 1H,  $J_{HH} = 8.3$  Hz), 4.92 (s, OCH<sub>2</sub>, 2H) ppm. <sup>13</sup>C NMR (DMSO) 169.8, 152.5, 126.1, 125.9, 123.5, 122.3, 122.1, 105.8, 65.0 ppm. MS (CI) 254.1 ([M+NH<sub>4</sub>]<sup>+</sup>).

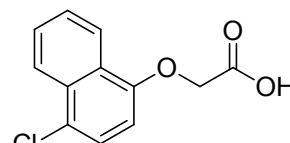

**4-Cl-1-NapLOMe:** <sup>1</sup>H NMR (CDCl<sub>3</sub>) 8.26 (m, ArH, 2H), 7.61 (m, ArH, 2H), 7.46 (d, ArH, 1H,  $J_{HH} = 8.3$  Hz), 6.96 (bd, NH, 1H,  $J_{HH} = 8.4$  Hz), 6.75 (d, ArH, 1H,  $J_{HH} = 8.3$  Hz), 4.75 (m, OCH and CHNH, 2H), 4.69 (d, OCH, 1H,  $J_{HH} = 15.0$  Hz), 3.74 (s, OCH<sub>3</sub>, 3H), 1.60 (m, CH and CH<sub>2</sub>, 3H), 0.93 (d, CH<sub>3</sub>, 3H,  $J_{HH} = 6.3$  Hz), 0.90 (d, CH<sub>3</sub>, 3H) ppm.

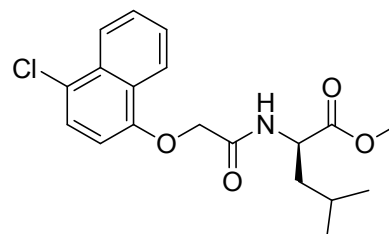

<sup>13</sup>C NMR (CDCl<sub>3</sub>) 172.9, 167.7, 152.0, 131.5, 127.9, 126.7, 126.3, 125.7, 125.1, 124.7, 121.7, 105.9, 67.9, 52.5, 50.4, 41.6, 24.9, 22.8, 21.9 ppm. MS (ES) 386 ([M+Na]<sup>+</sup>). Accurate mass calculated for C<sub>19</sub>H<sub>22</sub>NO<sub>4</sub>Na<sup>35</sup>Cl: 386.1135. Found: 386.1126.

**4-Cl-1-NapLOH (52):** <sup>1</sup>H NMR (DMSO) 8.44 (d, NH, 1H,  $J_{HH} = 8.2$  Hz), 8.38 (d, ArH, 1H,  $J_{HH} = 7.8$  Hz), 8.13 (d,

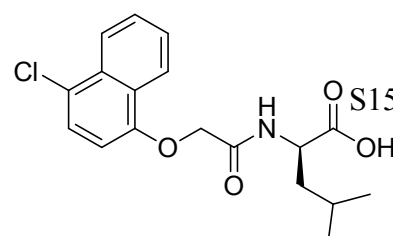

ArH, 1H,  $J_{HH} = 8.0$  Hz), 7.73 (m, ArH, 1H), 7.65 (m, ArH, 1H), 7.57 (d, ArH, 1H,  $J_{HH} = 8.3$  Hz), 6.90 (d, ArH, 1H,  $J_{HH} = 8.3$  Hz), 4.81 (d, OCH, 1H,  $J_{HH} = 14.5$  Hz), 4.76 (d, OCH, 1H,  $J_{HH} = 14.5$  Hz), 4.35 (m, CHNH, 1H), 1.61 (m, CH and CH<sub>2</sub>, 3H), 0.89 (d, CH<sub>3</sub>, 3H,  $J_{HH} = 6.1$  Hz), 0.85 (d, CH<sub>3</sub>, 3H,  $J_{HH} = 6.1$  Hz) ppm. <sup>13</sup>C NMR (DMSO) 173.7, 167.3, 152.7, 13.4, 128.1, 126.3, 126.0, 125.9, 123.5, 122.7, 122.3, 106.1, 67.3, 49.9, 24.3, 22.8, 21.2, 17.9 ppm. MS (ES) 372 ([M+Na]<sup>+</sup>). Accurate mass calculated for C<sub>18</sub>H<sub>20</sub>NO<sub>4</sub>Na<sup>35</sup>Cl: 372.0979. Found: 372.0973.

**2-TetrahydroNapLOMe:** <sup>1</sup>H NMR (CDCl<sub>3</sub>) 6.99 (d, ArH, 1H,  $J_{HH} = 8.4$  Hz), 6.88 (bd, NH, 1H,  $J_{HH} = 8.5$  Hz), 6.70 (dd, ArH, 1H,  $J_{HH} = 8.4$  Hz,  $J_{HH} = 2.8$  Hz), 6.63 (d, ArH, 1H,  $J_{HH} = 2.8$  Hz), 4.71 (m, CHNH, 1H), 4.48 (s, OCH<sub>2</sub>, 2H), 3.74 (s, OCH<sub>3</sub>, 3H), 2.72 (m, CH<sub>2</sub>, 4H), 1.75 (m, CH<sub>2</sub>, 4H), 1.59 (m, CH and CH<sub>2</sub>, 3H), 0.93 (m, CH<sub>3</sub>, 6H) ppm. <sup>13</sup>C NMR (CDCl<sub>3</sub>) 172.9, 168.5, 155.1, 138.6, 130.9, 130.2, 114.8, 112.5, 67.5, 52.4, 50.2, 41.5, 29.7, 28.6, 24.8, 23.3, 23.0, 22.8, 21.8 ppm. MS (ES) 356 ([M+Na]<sup>+</sup>). Accurate mass calculated for C<sub>19</sub>H<sub>27</sub>NO<sub>4</sub>Na: 356.1838. Found: 356.1830.

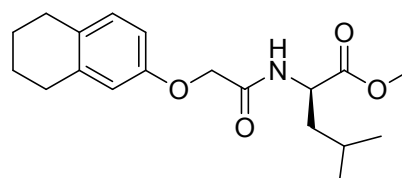

**2-TetrahydroNapLOH (53):** <sup>1</sup>H NMR (DMSO) 8.20 (d, NH, 1H,  $J_{HH} = 8.2$  Hz), 6.94 (d, ArH, 1H,  $J_{HH} = 8.4$  Hz), 6.68 (dd, ArH, 1H,  $J_{HH} = 8.4$  Hz,  $J_{HH} = 2.7$  Hz), 6.63 (d, ArH, 1H,  $J_{HH} = 2.7$  Hz), 4.48 (d, OCH, 1H,  $J_{HH} = 14.8$  Hz), 4.44 (d, OCH, 1H,  $J_{HH} = 14.8$  Hz), 4.30 (m, CHNH, 1H), 2.65 (m, CH<sub>2</sub>, 4H), 1.70 (m, CH<sub>2</sub>, 4H), 1.57 (m, CH and CH<sub>2</sub>, 3H), 0.88 (d, CH<sub>3</sub>, 3H,  $J_{HH} = 6.1$  Hz), 0.83 (d, CH<sub>3</sub>, 3H,  $J_{HH} = 6.1$  Hz) ppm. <sup>13</sup>C NMR (DMSO) 173.8, 167.9, 155.5, 137.5, 129.6, 129.1, 114.3, 112.6, 66.7, 49.8, 28.9, 27.9, 24.2, 22.9, 22.8, 22.6, 22.1 ppm. MS (ES) 342 ([M+Na]<sup>+</sup>). Accurate mass calculated for C<sub>18</sub>H<sub>25</sub>NO<sub>4</sub>Na: 342.1681. Found: 342.1674.

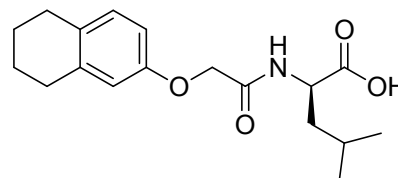

**2-TetrahydroNapLGOEt:** <sup>1</sup>H NMR (CDCl<sub>3</sub>) 6.98 (d, ArH, 1H,  $J_{HH} = 8.5$  Hz), 6.90 (bd, NH, 1H,  $J_{HH} = 8.4$  Hz), 6.68 (dd, ArH, 1H,  $J_{HH} = 8.3$  Hz,  $J_{HH} = 2.8$  Hz), 6.62 (d, ArH, 1H,  $J_{HH} = 2.8$  Hz), 4.57 (m, CHNH, 1H), 4.49 (s, OCH<sub>2</sub>, 2H), 4.21 (q, CH<sub>2</sub>, 2H), 4.00 (m, CH<sub>2</sub>NH, 2H), 2.71 (m, CH<sub>2</sub>, 4H), 1.73 (m, CH<sub>2</sub>, 4H), 1.69 (m, CH and CH<sub>2</sub>, 3H), 1.27 (t, CH<sub>3</sub>, 3H,  $J_{HH} = 7.1$  Hz), 0.92 (m, CH<sub>3</sub>, 6H) ppm. <sup>13</sup>C NMR (CDCl<sub>3</sub>) 171.6, 169.5, 168.9, 154.9, 138.7, 130.9, 130.2, 114.7, 112.4, 67.4, 61.6, 51.1, 41.4, 40.6, 29.6, 28.6, 24.7, 23.3, 23.0, 22.9, 21.9, 14.1 ppm. MS (ES) 427 ([M+Na]<sup>+</sup>). Accurate mass calculated for C<sub>22</sub>H<sub>32</sub>N<sub>2</sub>O<sub>5</sub>Na: 427.2209. Found: 427.2204.

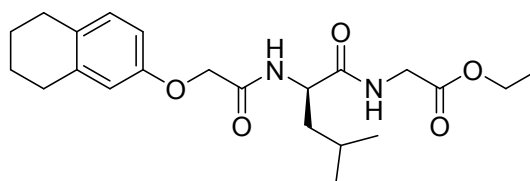

**2-TetrahydroNapLGOH (54):** <sup>1</sup>H NMR (DMSO) 8.30 (t, NH, 1H,  $J_{HH} = 5.8$  Hz), 8.00 (d, NH, 1H,  $J_{HH} = 8.7$  Hz), 6.95 (d, ArH, 1H,  $J_{HH} = 8.4$  Hz), 6.67 (dd, ArH, 1H,  $J_{HH} = 8.4$  Hz,  $J_{HH} = 2.7$  Hz), 6.61 (d, ArH, 1H,  $J_{HH} = 2.7$  Hz), 4.46 (m, OCH<sub>2</sub>

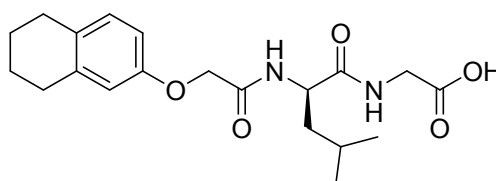



and CHNH, 3H), 3.74 (m, CH<sub>2</sub>NH, 2H), 2.63 (m, CH<sub>2</sub>, 4H), 1.70 (m, CH<sub>2</sub>, 4H), 1.50 (m, CH and CH<sub>2</sub>, 3H), 0.86 (d, CH<sub>3</sub>, 3H,  $J_{HH} = 6.1$  Hz), 0.83 (d, CH<sub>3</sub>, 3H,  $J_{HH} = 6.1$  Hz) ppm. <sup>13</sup>C NMR (DMSO) 172.1, 171.0, 167.6, 155.5, 137.5, 129.7, 129.1, 114.2, 112.6, 66.7, 50.3, 29.0, 27.9, 24.0, 23.1, 22.9, 22.6, 21.4 ppm. MS (ES) 399 ([M+Na]<sup>+</sup>). Accurate mass calculated for C<sub>20</sub>H<sub>28</sub>N<sub>2</sub>O<sub>5</sub>Na: 399.1896. Found: 399.1899.

**2-TetrahydroNapIIOMe:** <sup>1</sup>H NMR (CDCl<sub>3</sub>) 7.11

(d, ArH, NH,  $J_{HH} = 8.8$  Hz), 6.98 (d, ArH, 1H,  $J_{HH} = 8.4$  Hz), 6.68 (dd, ArH, 1H,  $J_{HH} = 8.3$  Hz,  $J_{HH} = 2.7$  Hz), 6.63 (d, ArH, 1H,  $J_{HH} = 2.7$  Hz), 6.41 (d, NH, 1H,  $J_{HH} = 8.4$  Hz), 4.55 (dd, CHNH, 1H,  $J_{HH} = 8.4$  Hz,  $J_{HH} = 4.8$  Hz), 4.50 (d, OCH, 1H,  $J_{HH} = 15.1$  Hz), 4.45 (d, OCH, 1H,  $J_{HH} = 15.1$  Hz), 4.37 (dd, CHNH, 1H,  $J_{HH} = 8.8$  Hz),  $J_{HH} = 7.3$  Hz), 3.74 (s, OCH<sub>3</sub>, 3H), 2.71 (m, CH<sub>2</sub>, 4H), 1.89 (m, CH, 2H), 1.78 (m, CH<sub>2</sub>, 4H), 1.48 (m, CH<sub>2</sub>, 2H), 1.11 (m, CH<sub>2</sub>, 2H), 0.90 (m, CH<sub>3</sub>, 12H) ppm. <sup>13</sup>C NMR (CDCl<sub>3</sub>) 171.9, 170.5, 168.6, 154.9, 138.6, 130.9, 130.2, 114.8, 112.4, 57.4, 57.3, 56.5, 52.1, 37.7, 37.1, 29.6, 28.6, 25.2, 24.9, 23.3, 23.0, 15.5, 15.3, 11.6, 11.2 ppm. MS (ES) 469 ([M+Na]<sup>+</sup>). Accurate mass calculated for C<sub>25</sub>H<sub>38</sub>N<sub>2</sub>O<sub>5</sub>Na: 469.2678. Found: 469.2687.

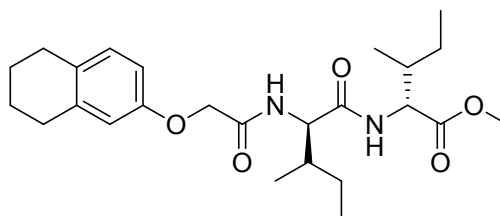

**2-TetrahydroNapIIOH (55):** <sup>1</sup>H NMR (DMSO)

8.14 (d, NH, 1H,  $J_{HH} = 8.0$  Hz), 7.77 (d, NH, 1H,  $J_{HH} = 9.0$  Hz), 6.94 (d, ArH, 1H,  $J_{HH} = 8.4$  Hz), 6.66 (dd, ArH, 1H,  $J_{HH} = 8.3$  Hz,  $J_{HH} = 2.7$  Hz), 6.61 (d, ArH, 1H,  $J_{HH} = 2.7$  Hz), 4.51 (d, OCH, 1H,  $J_{HH} = 14.9$  Hz), 4.46 (d, OCH, 1H,  $J_{HH} = 14.9$  Hz), 4.38 (dd, CHNH, 1H,  $J_{HH} = 9.0$  Hz,  $J_{HH} = 7.4$  Hz), 4.14 (dd, CHNH, 1H,  $J_{HH} = 8.0$  Hz,  $J_{HH} = 6.1$  Hz), 2.65 (m, CH<sub>2</sub>, 4H), 1.70 (m, CH<sub>2</sub> and CH, 6H), 1.39 (m, CH<sub>2</sub>, 2H), 1.10 (m, CH, 2H), 0.84 (m, CH<sub>3</sub>, 12H) ppm. <sup>13</sup>C NMR (DMSO) 172.7, 170.9, 167.4, 155.4, 137.5, 129.7, 129.2, 114.2, 112.5, 66.7, 56.4, 55.9, 37.1, 36.1, 29.0, 27.9, 24.7, 24.0, 22.9, 22.6, 15.4, 15.2, 11.2, 10.9 ppm. MS (ES) 455 ([M+Na]<sup>+</sup>). Accurate mass calculated for C<sub>24</sub>H<sub>36</sub>N<sub>2</sub>O<sub>5</sub>Na: 455.2522. Found: 455.2510.

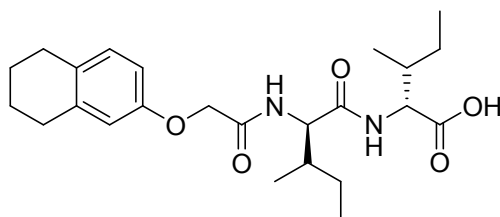

**1-TetrahydroNapO'Bu:** <sup>1</sup>H NMR (CDCl<sub>3</sub>) 7.01 (dd, 1H, ArH,  $J_{HH} = 7.8$  Hz,  $J_{HH} = 7.8$  Hz), 6.71 (d, ArH, 1H,  $J_{HH} = 7.6$  Hz), 6.49 (d, ArH, 1H,  $J_{HH} = 8.1$  Hz), 4.50 (s, OCH<sub>2</sub>, 2H), 2.74 (m, CH<sub>2</sub>, 4H), 1.76 (m, CH<sub>2</sub>, 4H), 1.48 (s, CH<sub>3</sub>, 9H) ppm. <sup>13</sup>C NMR (CDCl<sub>3</sub>)

168.4, 155.8, 138.9, 126.5, 125.5, 122.3, 107.7, 82.1, 65.9, 41.9, 29.7, 28.1, 23.1, 22.8, 22.7, 22.7 ppm. MS (ES) 285 ([M+Na]<sup>+</sup>). Accurate mass calculated for C<sub>16</sub>H<sub>22</sub>O<sub>3</sub>Na: 285.1467. Found: 282.1463.

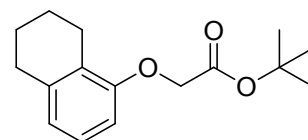

**1-TetrahydroNapOH:** <sup>1</sup>H NMR (DMSO) 7.00 (dd, ArH, 1H,  $J_{HH} = 7.9$  Hz,  $J_{HH} = 7.9$  Hz), 6.67 (d, ArH, 1H,  $J_{HH} = 7.6$  Hz), 6.59 (d, ArH, 1H,  $J_{HH} = 7.9$  Hz), 4.55 (s, OCH<sub>2</sub>, 2H), 2.69 (m, CH<sub>2</sub>, 2H), 2.59 (m, CH<sub>2</sub>, 2H), 1.69 (m, CH<sub>2</sub>, 4H) ppm. <sup>13</sup>C NMR (DMSO) 170.3, 155.4,

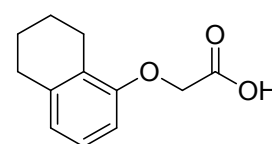

137.9, 125.6, 125.1, 121.5, 107.9, 64.6, 28.9, 22.7, 22.3 ppm. MS (CI) 207 ([M+H]<sup>+</sup>). Accurate mass calculated for C<sub>12</sub>H<sub>15</sub>O<sub>3</sub>: 207.1016. Found: 207.1024.

**1-TetrahydroNapFFOEt:** <sup>1</sup>H NMR (CDCl<sub>3</sub>) 7.15 (m, ArH, 8H), 7.00 (m, ArH and NH, 4H), 6.50 (d, ArH, 1H, *J*<sub>HH</sub> = 7.6 Hz), 6.50 (d, ArH, 1H, *J*<sub>HH</sub> = 8.0 Hz), 6.30 (d, NH, 1H, *J*<sub>HH</sub> = 7.7 Hz), 4.77 (m, CHNH, 2H), 4.41 (d, OCH, 1H, *J*<sub>HH</sub> = 15.0 Hz), 4.37 (d, OCH, 1H, *J*<sub>HH</sub> = 15.0 Hz), 4.14 (m, CH<sub>2</sub>, 2H), 3.01 (m, CH<sub>2</sub>Ph, 4H), 2.76 (m, CH<sub>2</sub>, 2H), 2.54 (m, CH<sub>2</sub>, 2H), 1.79 (m, CH<sub>2</sub>, 4H), 1.22 (t, CH<sub>3</sub>, 3H, *J*<sub>HH</sub> = 7.2 Hz) ppm.

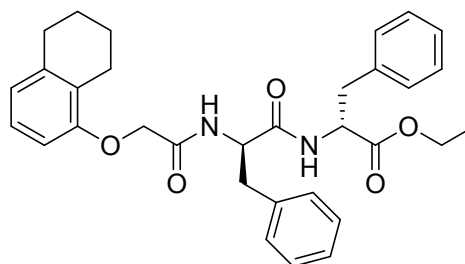

<sup>13</sup>C NMR (CDCl<sub>3</sub>) 170.9, 169.9, 168.7, 154.8, 139.2, 135.9, 135.6, 129.4, 129.2, 128.9, 128.7, 128.5, 127.1, 127.0, 125.9, 125.8, 122.9, 108.0, 66.9, 61.6, 53.5, 53.3, 37.9, 37.6, 29.6, 23.0, 22.7, 22.6, 14.1 ppm. MS (ES) 551 ([M+Na]<sup>+</sup>). Accurate mass calculated for C<sub>32</sub>H<sub>36</sub>N<sub>2</sub>O<sub>5</sub>Na: 551.2522. Found: 551.2516.

**1-TetrahydroNapFFOH (56):** <sup>1</sup>H NMR (DMSO) 8.46 (d, NH, 1H, *J*<sub>HH</sub> = 7.9 Hz), 7.73 (d, NH, 1H, *J*<sub>HH</sub> = 8.5 Hz), 7.21 (m, ArH, 10H), 6.95 (t, ArH, 1H, *J*<sub>HH</sub> = 7.9 Hz), 6.67 (d, ArH, 1H, *J*<sub>HH</sub> = 7.6 Hz), 6.48 (d, ArH, 1H, *J*<sub>HH</sub> = 8.0 Hz), 4.65 (m, CHNH, 1H), 4.46 (m, CHNH, 1H), 4.41 (d, OCH, 1H, *J*<sub>HH</sub> = 14.8 Hz), 4.33 (d, OCH, 1H, *J*<sub>HH</sub> = 14.8 Hz), 3.10 (dd, CHPh, 1H, *J*<sub>HH</sub> = 13.9 Hz, *J*<sub>HH</sub> = 5.1 Hz), 3.02 (dd, CHPh, 1H, *J*<sub>HH</sub> = 13.9 Hz, *J*<sub>HH</sub> = 4.4 Hz), 2.93 (dd, CHPh, 1H, *J*<sub>HH</sub> = 13.9 Hz, *J*<sub>HH</sub> = 8.9 Hz), 2.86 (dd, CHPh, 1H, *J*<sub>HH</sub> = 13.9 Hz, *J*<sub>HH</sub> = 8.9 Hz), 2.50 (m, CH<sub>2</sub>, 4H), 1.68 (m, CH<sub>2</sub>, 4H) ppm.

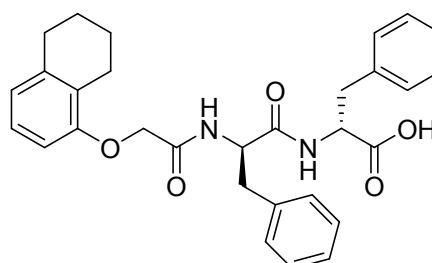

<sup>13</sup>C NMR (DMSO) 172.7, 170.5, 167.3, 155.1, 137.9, 137.4, 137.1, 129.3, 129.1, 128.2, 127.9, 126.4, 126.3, 125.7, 125.0, 121.8, 107.4, 66.7, 53.5, 52.7, 37.5, 36.7, 28.9, 22.5, 22.3 ppm. MS (ES) 523 ([M+Na]<sup>+</sup>). Accurate mass calculated for C<sub>30</sub>H<sub>32</sub>N<sub>2</sub>O<sub>5</sub>Na: 523.2209. Found: 523.2200.

**CarbIOMe:** <sup>1</sup>H NMR (CDCl<sub>3</sub>) 8.12 (d, ArH, 2H, *J*<sub>HH</sub> = 7.7 Hz), 7.48 (m, ArH, 2H), 7.38 (d, ArH, 2H, *J*<sub>HH</sub> = 8.2 Hz), 7.31 (m, ArH, 2H), 5.88 (d, NH, 1H, *J*<sub>HH</sub> = 8.8 Hz), 4.98 (d, NCH, 1H, *J*<sub>HH</sub> = 18.0 Hz), 4.93 (d, NCH, 1H, *J*<sub>HH</sub> = 18.0 Hz), 4.51 (m, CHNH, 1H), 3.56 (s, OCH<sub>3</sub>, 3H), 1.66 (m, CH, 1H), 1.48 (m, CH<sub>2</sub>, 1H), 0.93 (m, CH<sub>2</sub>, 1H), 0.67 (m, CH<sub>3</sub>, 6H) ppm.

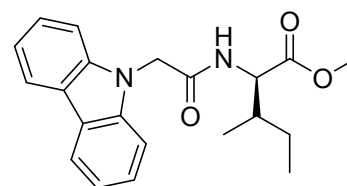

<sup>13</sup>C NMR (CDCl<sub>3</sub>) 171.4, 167.9, 140.3, 126.5, 123.5, 120.7, 120.4, 108.6, 56.3, 52.0, 47.1, 37.3, 24.7, 15.5, 11.2 ppm. MS (ES) 375 ([M+Na]<sup>+</sup>). Accurate mass calculated for C<sub>21</sub>H<sub>24</sub>N<sub>2</sub>O<sub>3</sub>Na: 375.1685. Found: 375.1682.

**Carb-I-OH (57):** <sup>1</sup>H NMR (DMSO) 8.59 (d, NH, 1H, *J*<sub>HH</sub> = 8.6 Hz), 8.14 (d, ArH, 2H, *J*<sub>HH</sub> = 7.7 Hz), 7.55 (d, ArH, 2H, *J*<sub>HH</sub> = 8.2 Hz), 7.40 (dt, ArH, 2H, *J*<sub>HH</sub> = 8.2 Hz, *J*<sub>HH</sub> = 1.1 Hz), 7.16 (dt, ArH, 2H, *J*<sub>HH</sub> = 7.7 Hz, *J*<sub>HH</sub> = 0.9 Hz), 5.18 (d, NCH, 1H,

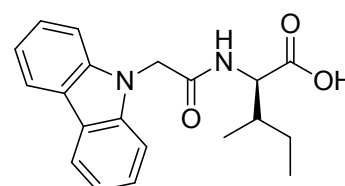

$J_{HH} = 16.7$  Hz), 5.11 (d, NCH, 1H,  $J_{HH} = 16.6$  Hz), 4.22 (dd, CHNH, 1H,  $J_{HH} = 8.6$  Hz,  $J_{HH} = 5.7$  Hz), 1.84 (m, CH, 1H), 1.44 (m, CH<sub>2</sub>, 1H), 1.23 (m, CH<sub>2</sub>, 1H), 0.87 (m, CH<sub>3</sub>, 6H) ppm. <sup>13</sup>C NMR (DMSO) 172.8, 167.6, 140.6, 125.6, 122.1, 120.1, 118.9, 109.3, 53.3, 45.1, 36.5, 24.7, 15.6, 11.3 ppm. MS (ES) 337 ([M-H]<sup>-</sup>). Accurate mass calculated for C<sub>20</sub>H<sub>21</sub>N<sub>2</sub>O<sub>3</sub>: 337.1552. Found: 337.1543.

**CarbIFOEt:** <sup>1</sup>H NMR (CDCl<sub>3</sub>) 8.13 (d, ArH, 2H,  $J_{HH} = 7.8$  Hz), 7.48 (m, ArH, 3H), 7.33 (m, ArH, 5H), 7.20 (m, ArH, 3H), 6.96 (m, ArH, 2H), 6.06 (d, NH, 1H,  $J_{HH} = 8.1$  Hz), 5.83 (d, NH, 1H,  $J_{HH} = 8.7$  Hz), 4.97 (d, NCH, 1H,  $J_{HH} = 17.9$  Hz), 4.91 (d, NCH, 1H,  $J_{HH} = 17.9$  Hz), 4.70 (m, CHNH, 1H), 4.18 (m, CH<sub>2</sub>, 2H), 3.04 (dd, CHPh, 1H,  $J_{HH} = 13.8$

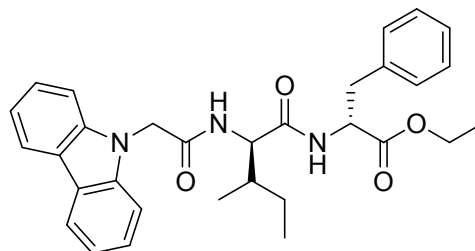

Hz,  $J_{HH} = 5.8$  Hz), 2.83 (dd, CHPh, 1H,  $J_{HH} = 13.8$  Hz,  $J_{HH} = 7.2$  Hz), 1.61 (t, CH<sub>2</sub>, 2H), 1.22 (t, CH<sub>3</sub>, 3H,  $J_{HH} = 7.2$  Hz), 0.61 (d, CH<sub>3</sub>, 3H,  $J_{HH} = 6.8$  Hz), 0.54 (t, CH<sub>3</sub>, 3H,  $J_{HH} = 7.2$  Hz) ppm. <sup>13</sup>C NMR (CDCl<sub>3</sub>) 171.1, 19.6, 168.2, 140.3, 135.7, 129.4, 129.2, 128.5, 127.1, 126.6, 123.5, 120.8, 120.5, 120.4, 108.4, 61.6, 57.5, 52.9, 47.0, 37.9, 36.2, 24.1, 18.9, 15.2, 14.1, 10.9 ppm. MS (ES) 536 ([M+Na]<sup>+</sup>). Accurate mass calculated for C<sub>31</sub>H<sub>35</sub>N<sub>3</sub>O<sub>4</sub>Na: 536.2525. Found: 536.2515.

**CarbIFOH (58):** <sup>1</sup>H NMR (DMSO) 8.62 (d, NH, 1H,  $J_{HH} = 9.2$  Hz), 8.13 (d, ArH, 2H,  $J_{HH} = 7.6$  Hz), 7.55 (d, ArH, 2H,  $J_{HH} = 8.2$  Hz), 7.49 (d, NH, 1H,  $J_{HH} = 5.8$  Hz), 7.42 (m, ArH, 2H), 7.20 (m, ArH, 2H), 7.09 (m, ArH, 5H), 5.16 (d, NCH<sub>2</sub>, 1H,  $J_{HH} = 16.7$  Hz), 5.06 (d, NCH<sub>2</sub>, 1H,  $J_{HH} = 16.7$  Hz), 4.06 (m, CHNH, 1H), 3.95 (m, CHNH, 1H), 3.08 (dd, CHPh, 1H,  $J_{HH} = 13.2$  Hz,

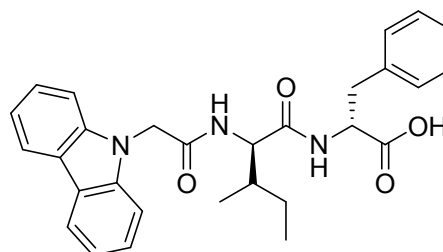

$J_{HH} = 5.3$  Hz), 2.98 (dd, CHPh, 1H,  $J_{HH} = 13.2$  Hz,  $J_{HH} = 5.2$  Hz), 1.75 (m, CH, 1H), 1.38 (m, CH<sub>2</sub>, 1H), 1.06 (m, CH<sub>2</sub>, 1H), 0.79 (m, CH<sub>3</sub>, 6H) ppm. This compound was too insoluble to record a <sup>13</sup>C NMR of sufficient quality. Attempts were made in DMSO and DMF. MS (ES) 508 ([M+Na]<sup>+</sup>). Accurate mass calculated for C<sub>29</sub>H<sub>31</sub>N<sub>3</sub>O<sub>4</sub>Na: 508.2212. Found: 508.2203.

**C<sub>14</sub>LOEt:** <sup>1</sup>H NMR (CDCl<sub>3</sub>) 5.85 (d, NH, 1H,  $J_{HH} = 8.3$  Hz), 4.64 (t, CHNH,

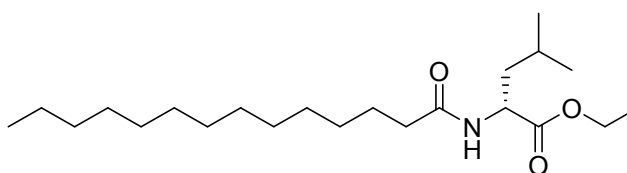

1H,  $J_{HH} = 8.7$  Hz,  $J_{HH} = 4.9$  Hz), 4.18 (q, CH<sub>2</sub>, 2H,  $J_{HH} = 7.2$  Hz), 2.21 (t, CH<sub>2</sub>, 2H,  $J_{HH} = 7.4$  Hz), 1.64 (m, CH<sub>2</sub>, 4H), 1.52 (m, CH, 1H), 1.27 (m, CH<sub>2</sub>, 20H), 0.95 (d, CH<sub>3</sub>, 3H,  $J_{HH} = 6.2$  Hz), 0.93 (d, CH<sub>3</sub>, 3H,  $J_{HH} = 6.2$  Hz), 0.88 (t, CH<sub>3</sub>, 3H,  $J_{HH} = 7.2$  Hz) ppm. <sup>13</sup>C NMR (CDCl<sub>3</sub>) 173.3, 172.9, 61.3, 50.6, 41.9, 36.6, 31.9, 30.9, 29.7, 29.5, 29.5, 29.3, 29.2, 25.6, 24.9, 22.8, 22.7, 22.0, 14.1 ppm. MS (ES) 392 ([M+Na]<sup>+</sup>). Accurate mass calculated for C<sub>22</sub>H<sub>43</sub>NO<sub>3</sub>Na: 392.3141. Found: 392.3149.

**C<sub>14</sub>LOH (59):** <sup>1</sup>H NMR (DMSO) 7.99 (d, NH, 1H, *J*<sub>HH</sub> = 8.0 Hz), 4.21 (m, CHNH, 1H), 2.09 (m, 2H, CH<sub>2</sub>), 1.62 (m, CH, 1H), 1.48 (m, CH<sub>2</sub>, 4H), 1.24 (m, CH<sub>2</sub>, 20H), 0.85 (m, CH<sub>3</sub>, 9H) ppm. <sup>13</sup>C NMR (DMSO)

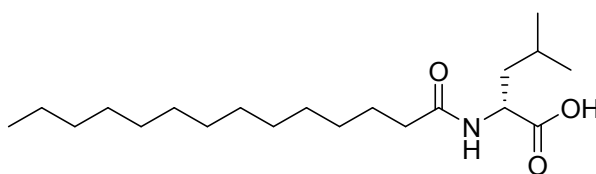

174.3, 172.2, 49.9, 34.9, 31.3, 28.9, 28.9, 28.7, 28.7, 25.5, 25.2, 24.3, 22.8, 22.1, 21.1, 13.9 ppm. MS (ES) 364 ([M+Na]<sup>+</sup>). Accurate mass calculated for C<sub>20</sub>H<sub>39</sub>NO<sub>3</sub>Na: 364.2828. Found: 364.2811.

**C<sub>12</sub>LOEt:** <sup>1</sup>H NMR (CDCl<sub>3</sub>) 5.83 (d, NH, 1H, *J*<sub>HH</sub> = 8.2 Hz), 4.64 (t, CHNH, 1H, *J*<sub>HH</sub> = 8.7 Hz, *J*<sub>HH</sub> = 5.0 Hz), 4.18 (q, CH<sub>2</sub>, 2H, *J*<sub>HH</sub> = 7.1 Hz), 2.21 (t, CH<sub>2</sub>, 2H, *J*<sub>HH</sub> = 7.4 Hz), 1.64 (m, CH and CH<sub>2</sub>, 5H), 1.27 (m, CH<sub>2</sub>,

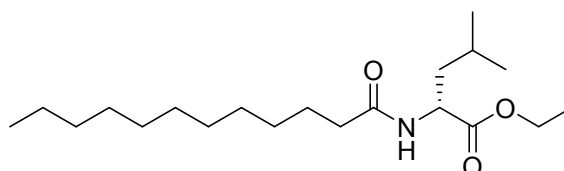

16H), 0.95 (d, CH<sub>3</sub>, 3H, *J*<sub>HH</sub> = 6.1 Hz), 0.94 (d, CH<sub>3</sub>, 3H, *J*<sub>HH</sub> = 6.1 Hz), 0.88 (t, CH<sub>3</sub>, 3H, *J*<sub>HH</sub> = 7.1 Hz) ppm. <sup>13</sup>C NMR (CDCl<sub>3</sub>) 173.3, 172.9, 61.3, 50.6, 41.9, 36.6, 31.9, 30.9, 29.6, 29.5, 29.3, 29.2, 25.6, 24.9, 22.8, 22.7, 22.0, 14.1 ppm. MS (ES) 364 ([M+Na]<sup>+</sup>). Accurate mass calculated for C<sub>20</sub>H<sub>39</sub>NO<sub>3</sub>Na: 364.2828. Found: 364.2840.

**C<sub>12</sub>LOH (60):** <sup>1</sup>H NMR (DMSO) 7.99 (d, NH, 1H, *J*<sub>HH</sub> = 8.0 Hz), 4.21 (m, CHNH, 1H), 2.09 (m, 2H, CH<sub>2</sub>), 1.62 (m, CH, 1H), 1.48 (m, CH<sub>2</sub>, 4H), 1.24 (m, CH<sub>2</sub>, 16H), 0.88 (m, CH<sub>3</sub>, 9H) ppm. <sup>13</sup>C NMR (DMSO) 174.3, 172.2, 49.9,

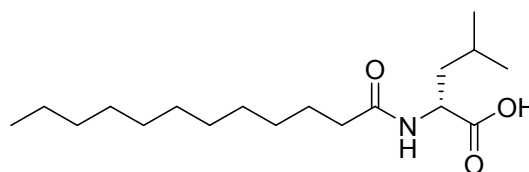

34.9, 31.3, 28.9, 28.9, 28.7, 28.7, 28.5, 25.2, 25.1, 24.3, 22.8, 22.1, 21.1, 13.9 ppm. MS (ES) 336 ([M+Na]<sup>+</sup>). Accurate mass calculated for C<sub>18</sub>H<sub>35</sub>NO<sub>3</sub>Na: 336.2515. Found: 336.2522.

**C<sub>14</sub>GOEt:** <sup>1</sup>H NMR (CDCl<sub>3</sub>) 5.95 (s, NH, 1H), 4.22 (q, CH<sub>2</sub>, 2H, *J*<sub>HH</sub> = 7.2 Hz), 4.03 (d, CH<sub>2</sub>NH, 2H, *J*<sub>HH</sub> = 5.1 Hz), 2.50 (t, CH<sub>2</sub>, 2H, *J*<sub>HH</sub> = 7.8 Hz), 1.63 (m, CH<sub>2</sub>, 2H), 1.27 (m,

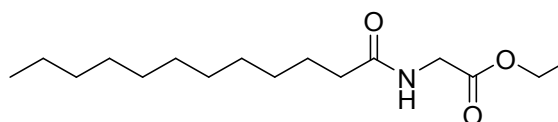

CH<sub>2</sub> and CH<sub>3</sub>, 23H), 0.88 (t, CH<sub>3</sub>, 3H, *J*<sub>HH</sub> = 7.2 Hz) ppm. <sup>13</sup>C NMR 173.3, 170.2, 61.5, 41.4, 36.5, 31.9, 29.7, 29.6, 29.6, 29.5, 29.4, 29.3, 29.2, 25.6, 22.7, 14.1 ppm. MS (ES) 336 ([M+Na]<sup>+</sup>). Accurate mass calculated for C<sub>18</sub>H<sub>35</sub>NO<sub>3</sub>Na: 336.2515. Found: 336.2509.

**C<sub>14</sub>GOH (61):** <sup>1</sup>H NMR (DMSO) 8.04 (t, NH, 1H, *J*<sub>HH</sub> = 5.9 Hz), 3.70 (d, CH<sub>2</sub>NH, 2H, *J*<sub>HH</sub> = 5.9 Hz), 2.10 (t, CH<sub>2</sub>, 2H, *J*<sub>HH</sub> = 7.5 Hz), 1.48 (m, CH<sub>2</sub>, 2H), 1.24 (m, CH<sub>2</sub>, 20H), 0.86 (t, CH<sub>3</sub>,

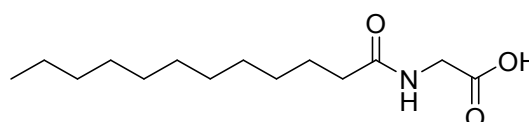

3H, *J*<sub>HH</sub> = 7.0 Hz) ppm. <sup>13</sup>C NMR (DMSO) 172.4, 40.7, 35.0, 31.3, 29.0, 28.9, 28.9, 28.8, 28.7, 28.6, 25.2, 22.1, 13.9 ppm. MS (ES) 308 ([M+Na]<sup>+</sup>). Accurate mass calculated for C<sub>16</sub>H<sub>31</sub>NO<sub>3</sub>Na: 308.2202. Found: 308.2204.

**BrNapAFOEt:**  $^1\text{H}$  NMR ( $\text{CDCl}_3$ ) 7.97 (d, ArH, 1H,  $J_{\text{HH}} = 1.9$  Hz), 7.73 (d, ArH, 1H,  $J_{\text{HH}} = 9.0$  Hz), 7.64 (d, ArH, 1H,  $J_{\text{HH}} = 8.8$  Hz), 7.55 (dd, ArH, 1H,  $J_{\text{HH}} = 8.8$  Hz,  $J_{\text{HH}} = 1.9$  Hz), 7.18 (m, ArH and NH, 8H), 6.46 (d,

NH, 1H,  $J_{\text{HH}} = 7.7$  Hz), 4.84 (m, CHNH, 2H), 4.61 (d, OCH, 1H,  $J_{\text{HH}} = 14.8$  Hz), 4.53 (d, OCH, 1H,  $J_{\text{HH}} = 14.8$  Hz), 4.20 (q,  $\text{CH}_2$ , 2H,  $J_{\text{HH}} = 7.2$  Hz), 3.16 (dd, CHPh, 1H,  $J_{\text{HH}} = 14.0$  Hz,  $J_{\text{HH}} = 5.8$  Hz), 3.07 (dd, CHPh, 1H,  $J_{\text{HH}} = 14.0$  Hz,  $J_{\text{HH}} = 6.4$  Hz), 1.42 (d,  $\text{CH}_3$ , 3H,  $J_{\text{HH}} = 7.0$  Hz), 1.27 (t,  $\text{CH}_3$ , 3H,  $J_{\text{HH}} = 7.2$  Hz) ppm.  $^{13}\text{C}$  NMR ( $\text{CDCl}_3$ ) 171.1, 167.7, 155.2, 135.6, 132.7, 130.6, 130.1, 129.7, 129.3, 129.1, 128.6, 128.5, 127.2, 119.3, 118.0, 107.6, 37.1, 31.6, 53.2, 48.3, 37.4, 15.0, 14.1 ppm. MS (ES) 549 ( $[\text{M}+\text{Na}]^+$ ). Accurate mass calculated for  $\text{C}_{26}\text{H}_{27}\text{N}_2\text{O}_5\text{Na}^{79}\text{Br}$ : 549.1001. Found: 549.1019.

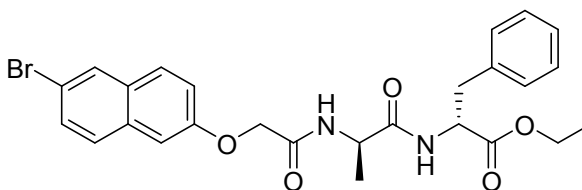

**BrNapAFOH (62):**  $^1\text{H}$  NMR (DMSO) 8.26 (d, NH, 1H,  $J_{\text{HH}} = 7.9$  Hz), 8.14 (d, NH, 1H,  $J_{\text{HH}} = 8.0$  Hz), 7.86 (d, ArH, 1H,  $J_{\text{HH}} = 9.0$  Hz), 7.76 (d, ArH, 1H,  $J_{\text{HH}} = 8.9$  Hz), 7.57 (dd, ArH, 1H,  $J_{\text{HH}} = 8.7$  Hz,  $J_{\text{HH}} = 2.2$  Hz), 7.29 (m,

ArH, 8H), 4.65 (d, OCH, 1H,  $J_{\text{HH}} = 14.8$  Hz), 4.61 (d, OCH, 1H,  $J_{\text{HH}} = 14.8$  Hz), 4.43 (m, CHNH, 2H), 3.04 (dd, CHPh, 1H,  $J_{\text{HH}} = 13.9$  Hz,  $J_{\text{HH}} = 5.2$  Hz), 2.89 (dd, CHPh, 1H,  $J_{\text{HH}} = 13.9$  Hz,  $J_{\text{HH}} = 8.8$  Hz), 1.24 (d,  $\text{CH}_3$ , 3H,  $J_{\text{HH}} = 7.0$  Hz) ppm.  $^{13}\text{C}$  NMR (DMSO) 172.7, 171.8, 166.8, 155.9, 137.4, 132.6, 129.9, 129.4, 129.3, 129.1, 128.9, 128.6, 128.1, 126.4, 119.7, 116.6, 107.4, 66.7, 53.5, 47.6, 36.5, 18.4 ppm. MS (ES) 521 ( $[\text{M}+\text{Na}]^+$ ). Accurate mass calculated for  $\text{C}_{24}\text{H}_{23}\text{N}_2\text{O}_5\text{Na}^{79}\text{Br}$ : 521.0688. Found: 521.0685.

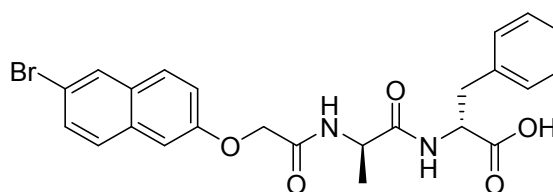

**CarbFVOMe:**  $^1\text{H}$  NMR ( $\text{CDCl}_3$ ) 8.11 (d, ArH, 2H,  $J_{\text{HH}} = 7.8$  Hz), 7.44 (m, ArH, 2H), 7.30 (m, ArH, 4H), 7.24 (t, ArH, 2H,  $J_{\text{HH}} = 7.7$  Hz), 7.06 (m, ArH, 1H), 6.97 (t, ArH, 2H,  $J_{\text{HH}} = 7.7$  Hz), 6.68 (d, NH, 1H,  $J_{\text{HH}} = 8.6$  Hz), 5.92 (d, NH, 1H,  $J_{\text{HH}} = 7.9$  Hz), 4.93 (d, NCH, 1H,  $J_{\text{HH}} = 18.1$  Hz), 4.86 (d, NCH, 1H,  $J_{\text{HH}} = 18.1$  Hz), 4.66 (dt, CHNH, 1H,  $J_{\text{HH}} = 7.9$  Hz,  $J_{\text{HH}} = 6.7$  Hz), 4.30 (dd, CHNH, 1H,  $J_{\text{HH}} = 8.6$  Hz,  $J_{\text{HH}} = 4.8$  Hz), 3.73 (s,  $\text{OCH}_3$ , 3H), 2.83 (d,  $\text{CH}_2\text{Ph}$ , 2H,  $J_{\text{HH}} = 6.7$  Hz), 2.01 (m,  $\text{CH}(\text{CH}_3)_2$ , 1H), 0.76 (d,  $\text{CH}_3$ , 3H,  $J_{\text{HH}} = 6.9$  Hz), 0.72 (d,  $\text{CH}_3$ , 3H,  $J_{\text{HH}} = 6.9$  Hz) ppm.  $^{13}\text{C}$  NMR ( $\text{CDCl}_3$ ) 171.9, 169.8, 168.4, 140.0, 135.3, 129.3, 128.8, 128.6, 126.9, 136.6, 123.5, 120.7, 120.4, 108.3, 57.2, 54.1, 52.2, 46.8, 36.9, 34.4, 48.8, 17.8 ppm. MS (ES) 508 ( $[\text{M}+\text{Na}]^+$ ). Accurate mass calculated for  $\text{C}_{29}\text{H}_{31}\text{N}_3\text{O}_4\text{Na}$ : 508.2212. Found: 508.2201.

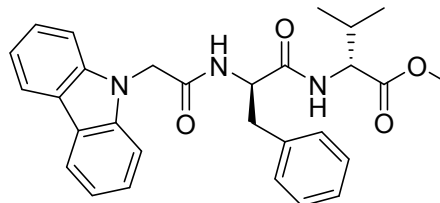

**CarbFVOH (63):**  $^1\text{H}$  NMR (DMSO) 8.06 (d, NH, 1H,  $J_{\text{HH}} = 8.6$  Hz), 8.16 (d, NH, 1H,  $J_{\text{HH}} = 8.4$  Hz), 7.10 (d, ArH, 2H,  $J_{\text{HH}} = 7.7$  Hz), 7.38 – 7.16 (m, ArH, 11H), 5.04 (d, NCH, 1H,  $J_{\text{HH}} = 17.8$  Hz), 4.92 (d, NCH, 1H,  $J_{\text{HH}} = 17.8$  Hz), 4.71 (m, CHNH, 1H), 4.14 (dd, CHNH, 1H,  $J_{\text{HH}} = 8.4$  Hz,  $J_{\text{HH}} = 5.7$  Hz), 3.06 (dd, CHPh, 1H,

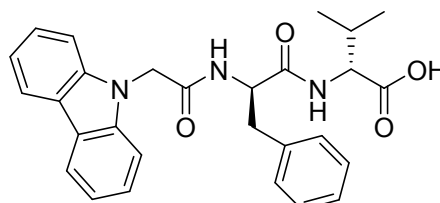

$J_{HH} = 13.8$  Hz,  $J_{HH} = 4.0$  Hz), 2.81 (dd, CHPh, 1H,  $J_{HH} = 13.8$  Hz,  $J_{HH} = 10.1$  Hz), 2.06 (m, CH(CH<sub>3</sub>)<sub>2</sub>, 1H), 0.86 (d, CH<sub>3</sub>, 6H) ppm. <sup>13</sup>C NMR (DMSO) 172.8, 171.1, 167.1, 140.4, 137.6, 129.3, 1280, 126.3, 125.6, 122.0, 119.9, 118.9, 109.3, 57.5, 53.5, 45.2, 37.7, 19.1, 18.0 ppm. MS (ES) 494 ([M+Na]<sup>+</sup>). Accurate mass calculated for C<sub>28</sub>H<sub>29</sub>N<sub>3</sub>O<sub>4</sub>Na: 494.2056. Found: 494.2047.

**CarbVAOMe:** <sup>1</sup>H NMR (CDCl<sub>3</sub>) 8.12 (d, ArH, 2H,  $J_{HH} = 7.7$  Hz), 7.50 (m, ArH, 2H), 7.37 (d, ArH, 2H,  $J_{HH} = 8.2$  Hz), 7.31 (m, ArH, 2H), 6.17 (NH, 1H  $J_{HH} = 7.0$  Hz), 5.94 (d, NH, 1H,  $J_{HH} = 8.4$  Hz), 4.01 (d, NCH, 1H,  $J_{HH} = 18.1$  Hz), 4.94 (d, NCH, 1H,  $J_{HH} = 18.1$  Hz), 4.45 (m, CHNH, 1H), 4.20 (dd, CHNH, 1H,  $J_{HH} = 8.7$  Hz,  $J_{HH} = 6.3$  Hz), 3.72 (s, OCH<sub>3</sub>, 3H), 1.93 (m, CH(CH<sub>3</sub>)<sub>2</sub>, 1H), 1.30 (d, CH<sub>3</sub>, 3H,  $J_{HH} = 7.2$  Hz), 0.74 (d, CH<sub>3</sub>, 3H,  $J_{HH} = 6.8$  Hz), 0.51 (d, CH<sub>3</sub>, 3H,  $J_{HH} = 6.8$  Hz) ppm. <sup>13</sup>C NMR (DMSO) 172.8, 170.7, 167.3, 140.5, 125.6, 122.1, 120.9, 118.9, 109.3, 56.9, 51.7, 47.5, 45.2, 31.0, 19.0, 17.9, 16.7 ppm. MS (ES) 432 ([M+Na]<sup>+</sup>). Accurate mass calculated for C<sub>23</sub>H<sub>27</sub>N<sub>3</sub>O<sub>4</sub>Na: 432.1899. Found: 432.1891.

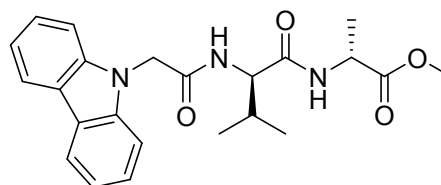

**CarbVAOH (64):** <sup>1</sup>H NMR (DMSO) 8.38 (d, NH, 1H,  $J_{HH} = 9.2$  Hz), 8.35 (d, NH, 1H,  $J_{HH} = 6.9$  Hz), 8.14 (d, ArH, 2H,  $J_{HH} = 7.7$  Hz), 7.55 (d, ArH, 2H,  $J_{HH} = 8.2$  Hz), 7.43 (m, ArH, 2H), 7.20 (m, ArH, 2H), 5.18 (d, NCH, 1H,  $J_{HH} = 16.7$  Hz), 5.12 (d, NCH, 1H,  $J_{HH} = 16.7$  Hz), 4.26 (dd, CHNH, 1H,  $J_{HH} = 9.1$  Hz,  $J_{HH} = 6.6$  Hz), 4.20 (m, CHNH, 1H), 2.01 (m, CH(CH<sub>3</sub>)<sub>2</sub>, 1H), 1.26 (d, CH<sub>3</sub>, 3H,  $J_{HH} = 7.3$  Hz), 0.87 (m, CH<sub>3</sub>, 6H) ppm. <sup>13</sup>C NMR (DMSO) 173.9, 170.5, 167.3, 14.6, 125.6, 122.1, 120.1, 118.9, 109.4, 57.0, 47.4, 45.2, 31.1, 19.1, 17.9, 16.9 ppm. MS (ES) 418 ([M+Na]<sup>+</sup>). Accurate mass calculated for C<sub>22</sub>H<sub>25</sub>N<sub>3</sub>O<sub>4</sub>Na: 418.1743. Found: 418.1733.

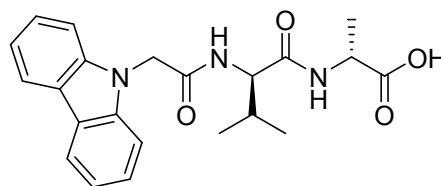

## Section 2

**Gelation tests:** The gelation was probed using the following method. The molecule of choice was dispersed in deionised water. Sodium hydroxide (1 molar equivalent of a 0.1 M solution) was added such that the final concentration of the molecule was 5 mg/mL. To 2 mL of this solution was added 16 mg glucono- $\delta$ -lactone (GdL). After swirling briefly to dissolve the GdL, the sample was allowed to stand at room temperature overnight (18 hours). At this point, the sample was determined to be a transparent gel (G), a turbid gel (TG), or a non-gelling precipitate (P) or non-gelling crystals (C). The results are shown in Table S1. Set refers to whether the compound is in the training (Tr), testing (Te) or validation (V) set.

| Compound | Set | Gelation? | Compound | Set | Gelation? | Compound | Set | Gelation? |
|----------|-----|-----------|----------|-----|-----------|----------|-----|-----------|
| 1        | Te  | P         | 22       | Tr  | P         | 43       | Tr  | C         |
| 2        | Te  | P         | 23       | Tr  | G         | 44       | Tr  | G         |
| 3        | Te  | P         | 24       | Tr  | G         | 45       | Tr  | P         |
| 4        | Te  | G         | 25       | Tr  | G         | 46       | V   | C         |
| 5        | Te  | TG        | 26       | Te  | P         | 47       | V   | P         |
| 6        | Te  | P         | 27       | Te  | P         | 48       | Tr  | P         |
| 7        | Tr  | C         | 28       | Te  | P         | 49       | Tr  | P         |
| 8        | Tr  | C         | 29       | Te  | G         | 50       | Tr  | P         |
| 9        | Tr  | G         | 30       | Te  | G         | 51       | V   | P         |
| 10       | Tr  | G         | 31       | Tr  | C         | 52       | V   | P         |
| 11       | Tr  | G         | 32       | Te  | P         | 53       | Te  | P         |
| 12       | Tr  | G         | 33       | Te  | C         | 54       | V   | P         |
| 13       | Tr  | G         | 34       | Te  | P         | 55       | Tr  | G         |
| 14       | Tr  | G         | 35       | Te  | C         | 56       | V   | TG        |
| 15       | Tr  | G         | 36       | Te  | P         | 57       | Te  | TG        |
| 16       | Tr  | G         | 37       | Te  | P         | 58       | V   | G         |
| 17       | Tr  | G         | 38       | Te  | C         | 59       | Tr  | P         |
| 18       | Tr  | P         | 39       | Tr  | P         | 60       | Tr  | P         |
| 19       | Tr  | G         | 40       | Tr  | P         | 61       | Tr  | P         |
| 20       | Tr  | TG        | 41       | Te  | P         | 62       | Tr  | P         |
| 21       | Tr  | G         | 42       | Tr  | P         | 63       | V   | TG        |
|          |     |           |          |     |           | 64       | V   | G         |

**Table S1** Allocation of the compounds to the training (Tr), testing (Te) or validation (V) set. Whether the compound resulted in a transparent gel (G), a turbid gel (TG), or a non-gelling precipitate (P) or non-gelling crystals (C) is also shown.

### Section 3

#### QSPR

The molecules were generated *in silico* using ChemDraw,<sup>10</sup> converted to SMILES format, The descriptors were calculated using Pipeline Pilot<sup>11</sup> (ALogP, Molecular\_Weight, Num\_Atoms, Num\_RotatableBonds, Num\_Rings, Num\_H\_Acceptors, Num\_H\_Donors, Molecular\_SurfaceArea, Molecular\_PolarSurfaceArea, Molecular\_PolarSASA, Molecular\_Solubility, LogD, ECFP4 and FCFP4). Molecular fingerprint descriptors ECFP4 and FCFP4 were converted to a list of integer bits 2048 bits long with the least significant bit packed first.<sup>12</sup>

Visualisation was achieved using the PCA,<sup>13</sup> cMDS,<sup>13</sup> isoMDS<sup>14</sup> and Sammon<sup>14</sup> R libraries. Machine learning was performed using the Caret library in R.<sup>15</sup>

The Caret (Classification and Regression Training)<sup>15</sup> library in R<sup>13</sup> was used to remove descriptors with near zero variance (constant or almost constant values throughout all the samples) and highly correlated descriptors ( $r^2 \geq 0.9$ ), reducing the number of descriptors to analyse and the remaining 57 descriptors auto-scaled. This set of 57 descriptors were used for both the visualisation and machine learning methods.

Model training was performed using pre-processing of centring and scaling, tunelength of 10 with a 5-fold cross validation repeated 50 times using H measure as an objective function.

Previous recommendations for structure-property modelling have been published.<sup>16</sup> Below in Table S2, we map onto these five points this current work.

| <b>Recommendation</b>                                                | <b>This work</b>                                                                    |
|----------------------------------------------------------------------|-------------------------------------------------------------------------------------|
| A defined end point                                                  | Formation of gel using approach described in experimental section                   |
| An unambiguous algorithm                                             | Methods fully described in experimental and results and discussion section          |
| A defined domain of applicability                                    | Domain of applicability is defined in experimental section                          |
| Appropriate measures of goodness-of-fit, robustness and predictivity | Measures described and justified in experimental and results and discussion section |
| A mechanistic interpretation, if possible                            | Interpretation suggested in results and discussion section                          |

**Table S2.** OECD QSPR Guidelines and how this work maps onto them



### Visualising and exploring “gelator space”

The search for new molecules that can form gels can be referred to in terms of exploration and navigation through “chemical space”.<sup>17</sup> “Chemical space” has been defined as the set of all possible molecules and their associated properties in multi-dimensional space. Visualisation techniques can be extremely powerful tools for picturing many molecules at once and understanding trends in their properties. Chemical space visualizations show each molecule as a point within a plot and permits visualisation of where a compound resides within chemical space using descriptors to define the coordinates. There are almost limitless possible ways of visualising chemical space with no one single representation being suitable for all purposes. Further to this, different representations of chemical space will be of different utility for each researcher. The simplest approaches to visualisation of “gelator space” use a few simple parameters related to molecular properties. The perceived closeness of the points in chemical space may reflect the chemist’s idea of similarity of the molecules under consideration. A useful representation of chemical space would very quickly enable identification of areas of chemical space that are rich in gelators whilst also highlighting areas that are predicted to contain few gel forming compounds. Consequently, several visualisation techniques were investigated in order to map areas of gelator space.

If such a relatively simple and powerful relationship existed (as it does in other fields, e.g. Lipinski Guidelines in drug discovery<sup>18</sup>), visualization of datasets with such descriptor coordinates would be easily interpretable and very intuitive. However, as can be seen in Figure S2, for the training set across the 12 molecular properties shown there is not a simple relationship between one single descriptor and the ability of the molecule to gel, i.e. the distributions of gelator/non-gelator for each molecular property all overlap to some extent. The same is true when molecular fingerprints are examined in the same way (see Figure S3). Therefore, as perhaps expected from the difficulty in generating design rules for gelators, it is through a complex interplay of molecular properties that the gelation of a molecule is exercised. Hence, we hypothesise that it is via more sophisticated techniques such as mapping chemical space and machine learning that we will be able to develop models that are truly predictive on the ability of compounds to form gels.

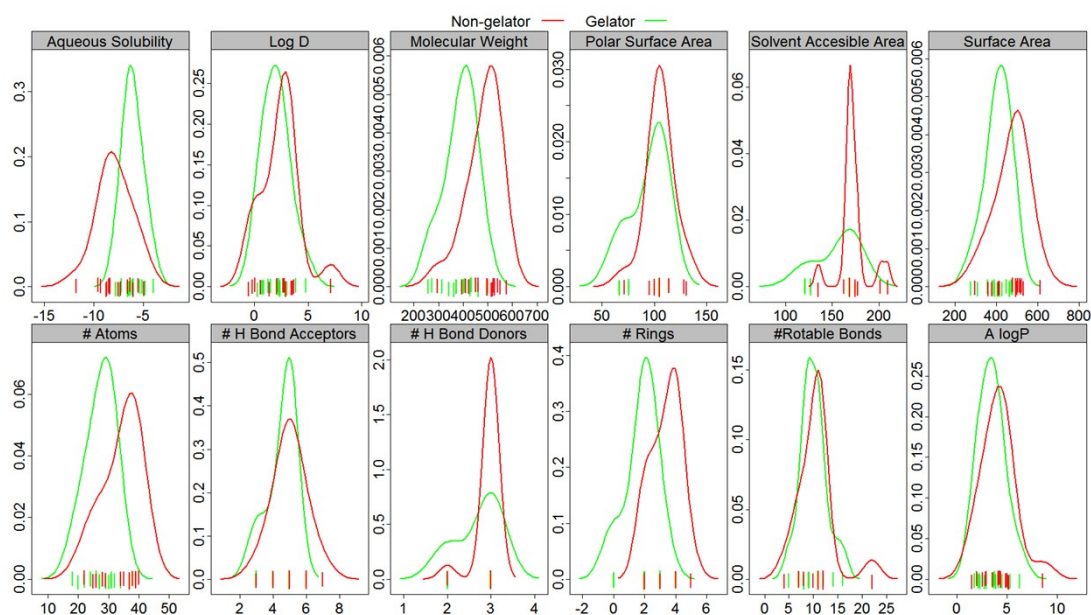

**Figure S2.** Plot of 12 physicochemical descriptors calculated and their distributions on forming (green) or not forming (red) a gel for the training set. The value of each molecule's descriptor is depicted by | marker.

In map-based representations of the chemical space, the multi-dimensional descriptor spaces of the compounds are folded (mapped) into the two-dimensional plot space, similar to the construction of flat Earth maps from three-dimensional data.<sup>17</sup> Data projection techniques provide a route to condense a large amount of multi-dimensional chemical information, i.e. all the molecular properties calculated can be reduced into a smaller number of dimensions in order to aid visualisation and analysis.

Principal component analysis (PCA) is such an approach. It is a simple non-parametric method of extracting relevant information from complex data that are often confusing, clouded, or even redundant. PCA transforms a number of possibly interdependent or correlated variables into a smaller number of significant, independent, and uncorrelated orthogonal components<sup>19</sup>. Each principal component is a linear combination of the molecular properties being considered. A principal component analysis of the 34 molecules in the training set and the all the descriptors, revealed that 48.54% of the total variance of the molecular descriptors is captured in the first three principal components. A plot of the first two components (Figure S3a) shows that there is not a clear demarcation within principal component space which separates out gelators from non-gelators completely, i.e. there is no clear clustering in any of the plots of gelators/non-gelators that completely separates gelators from non-gelators.

Another approach for viewing “gelator space” via dimensionality reduction is to utilise multidimensional scaling techniques, which attempt to transform a set of data points to fewer dimensions in such a way that the distances between points are preserved as much as possible. Despite their lower visual interpretability compared with PCA, the maps allow better clustering of the compounds and possess higher predictive ability.<sup>17</sup>

If the data are reduced to two dimensions, this allows one to visualize the compounds and see by inspection the relative distances between them - similar molecules would cluster together. Three different methods (classical, Kruskal and Sammon, Figure S3 b, c and d) were used in order to see if a clear distinction between gelator and non-

gelator space for the training set. However, visually there is no clustering in any of the plots of gelators/non-gelators that completely separates gelators from non-gelators.

---

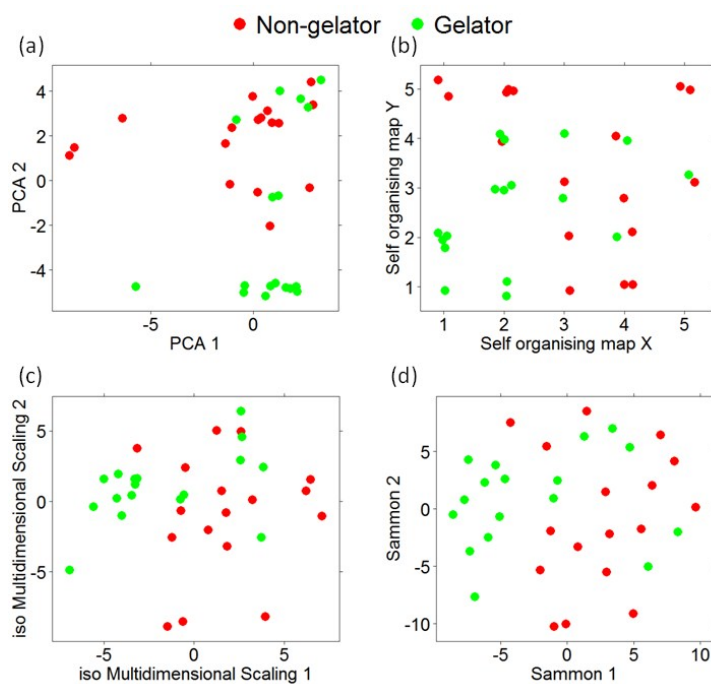

**Figure S3.** a) PCA, b) Classical, c) Kruskal and d) Sammon plots of forming (green) or not forming (red) a gel. Data shown for the training set.

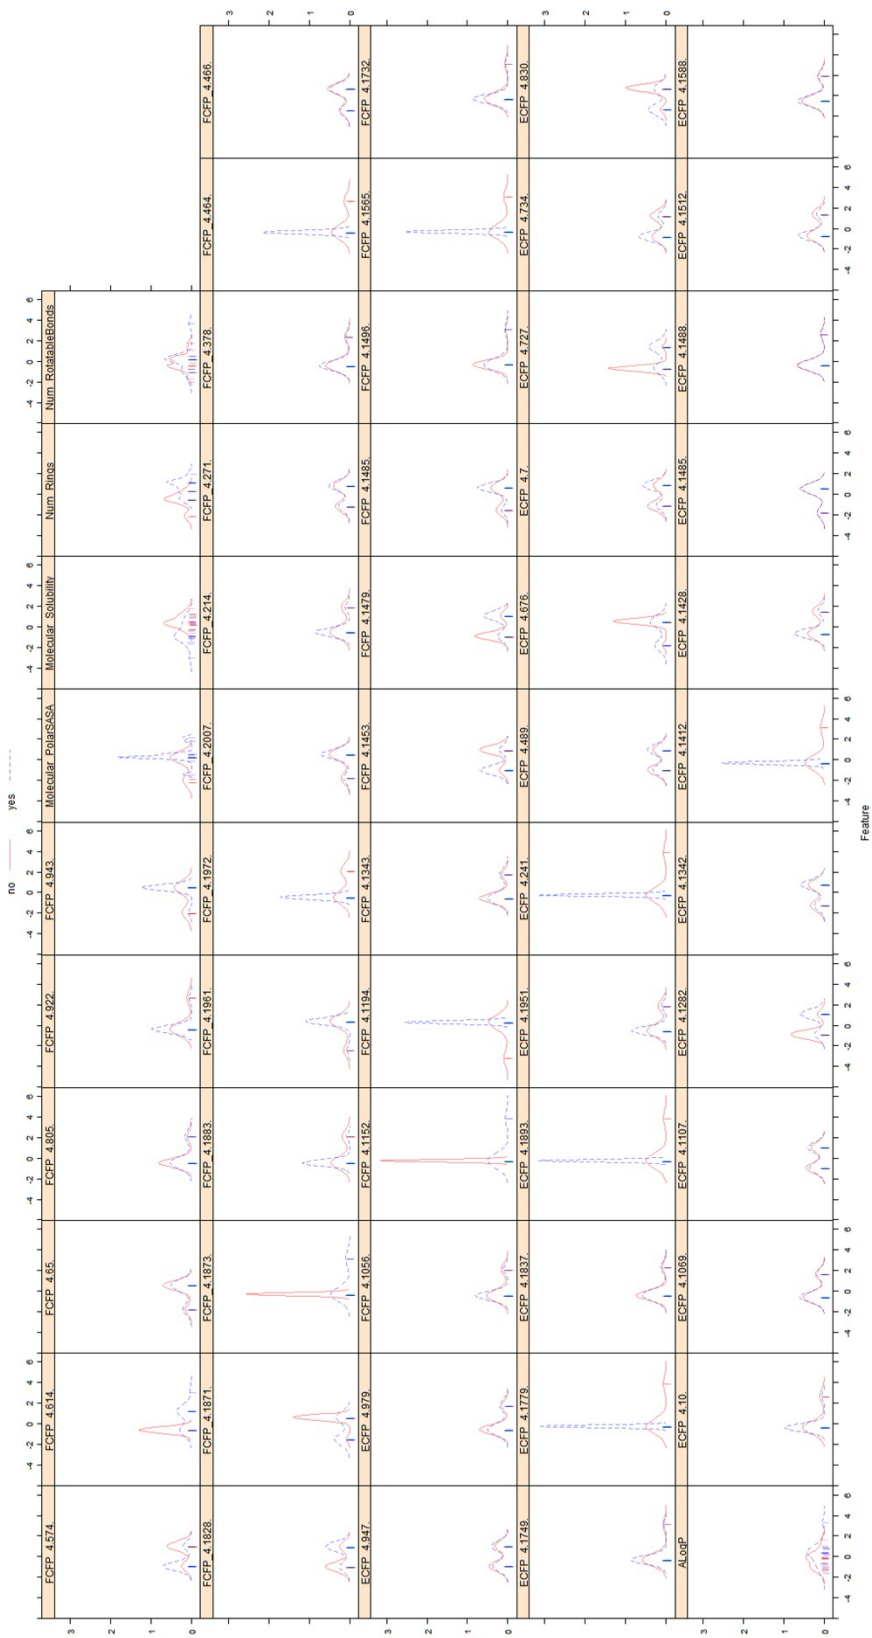

**Figure S4** Plot of the 57 descriptors and their distributions on forming (blue dotted) or not forming (red solid) a gel

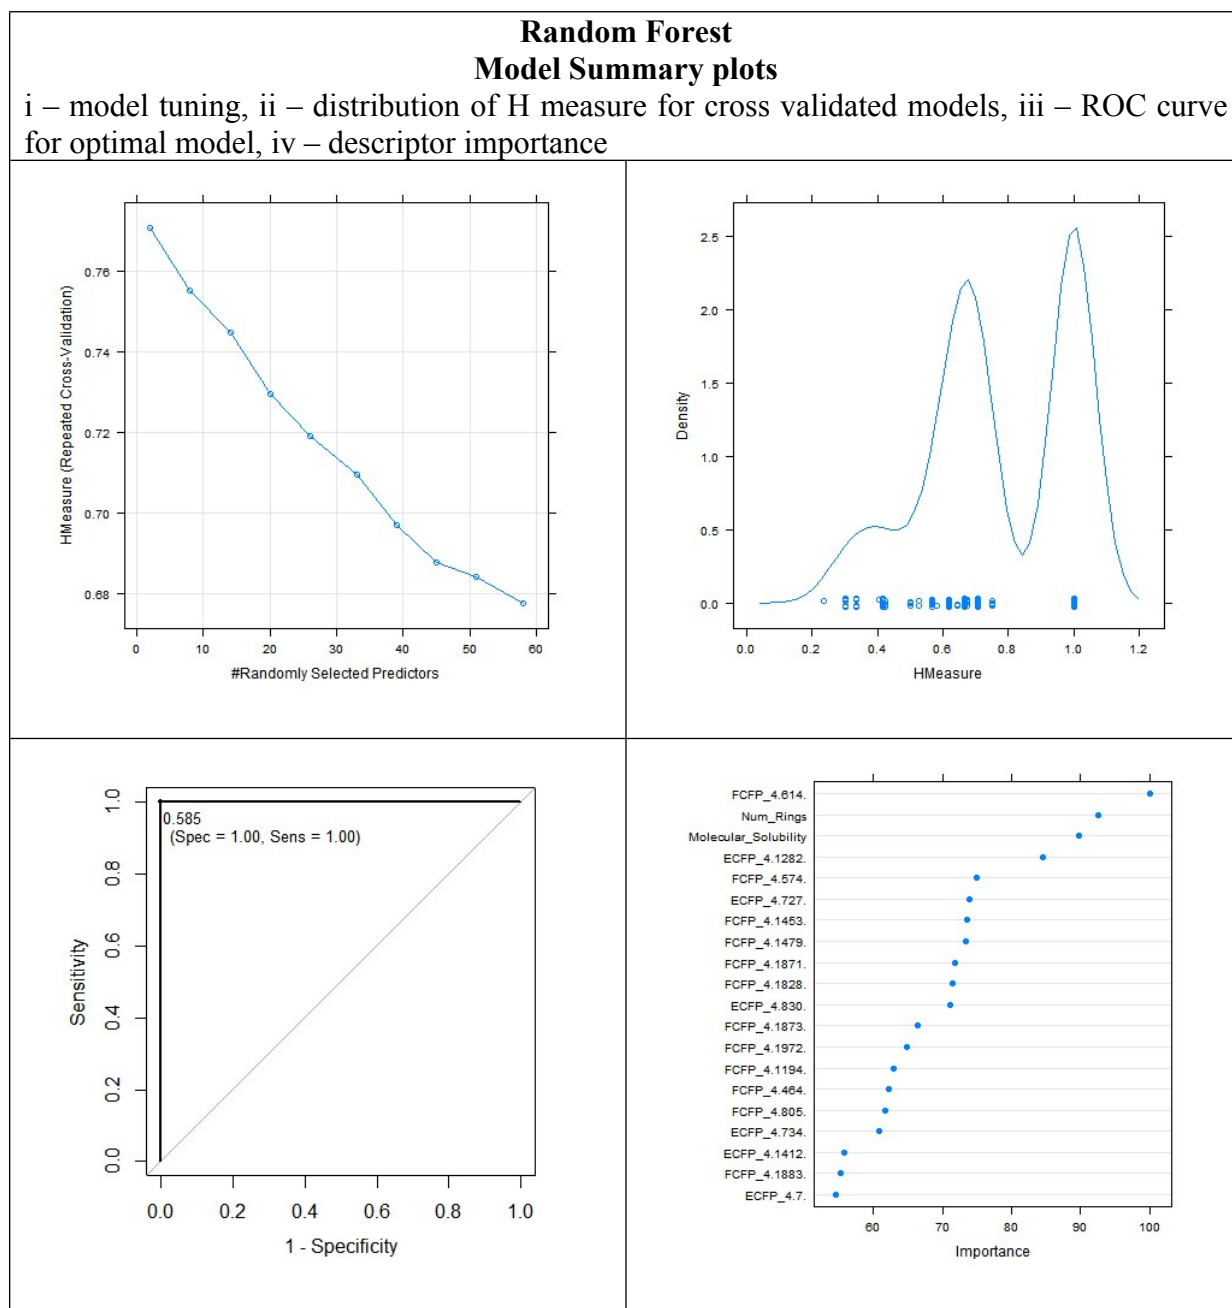

**Figure S5** Model summary plot for the Random Forest model

### Support Vector Machines Model Summary plots

i – model tuning, ii – distribution of H measure for cross validated models, iii – ROC curve for optimal model, iv – descriptor importance

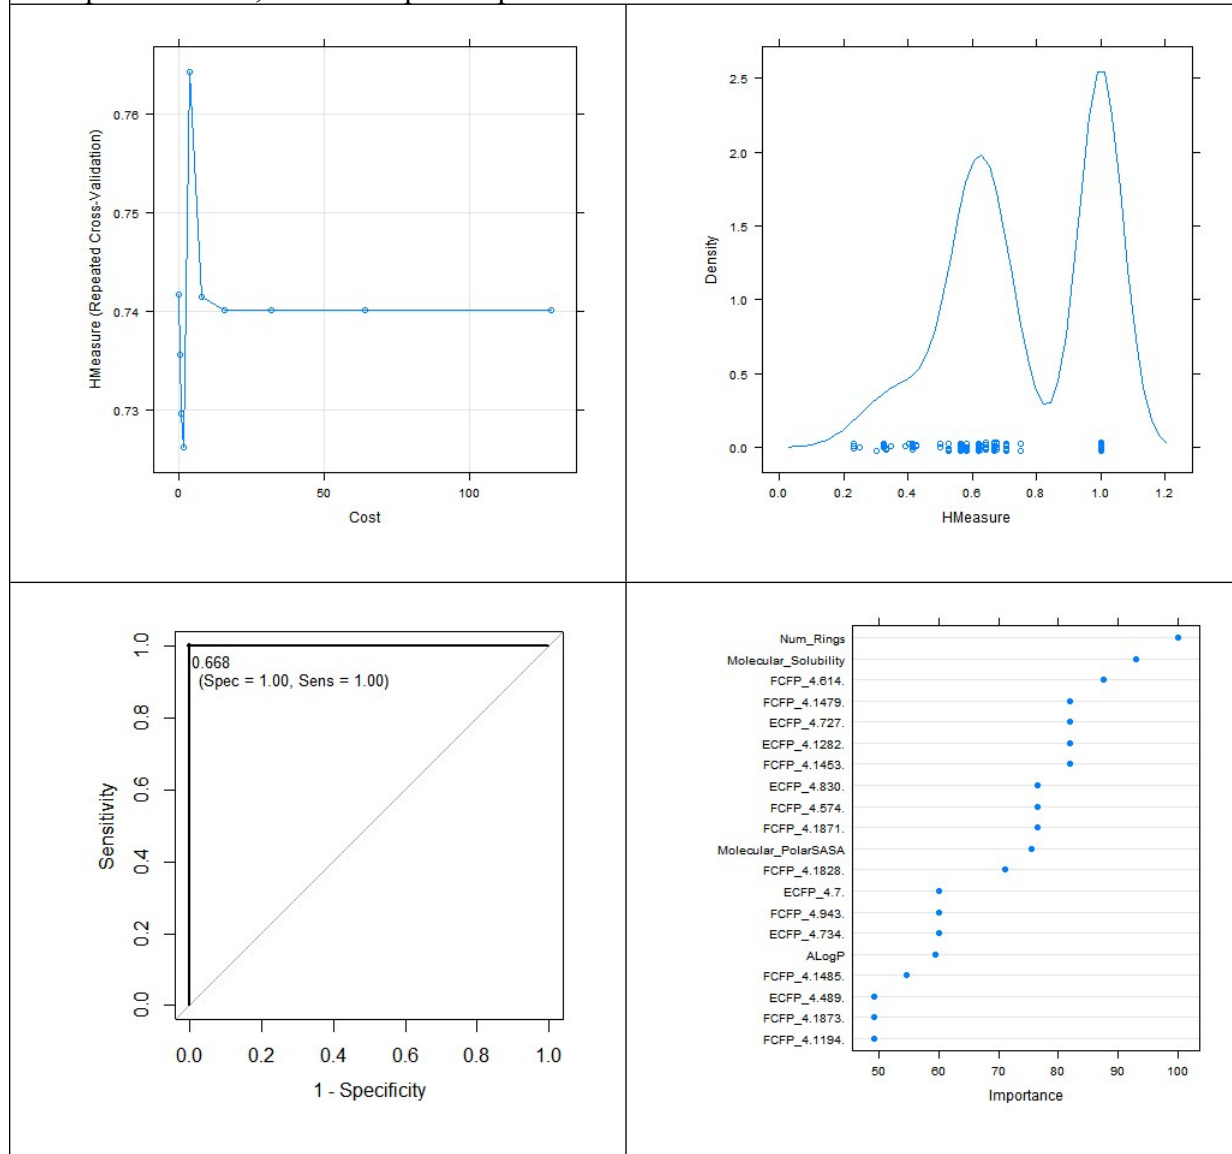

**Figure S6** Model summary plot for the Support Vector Machines model

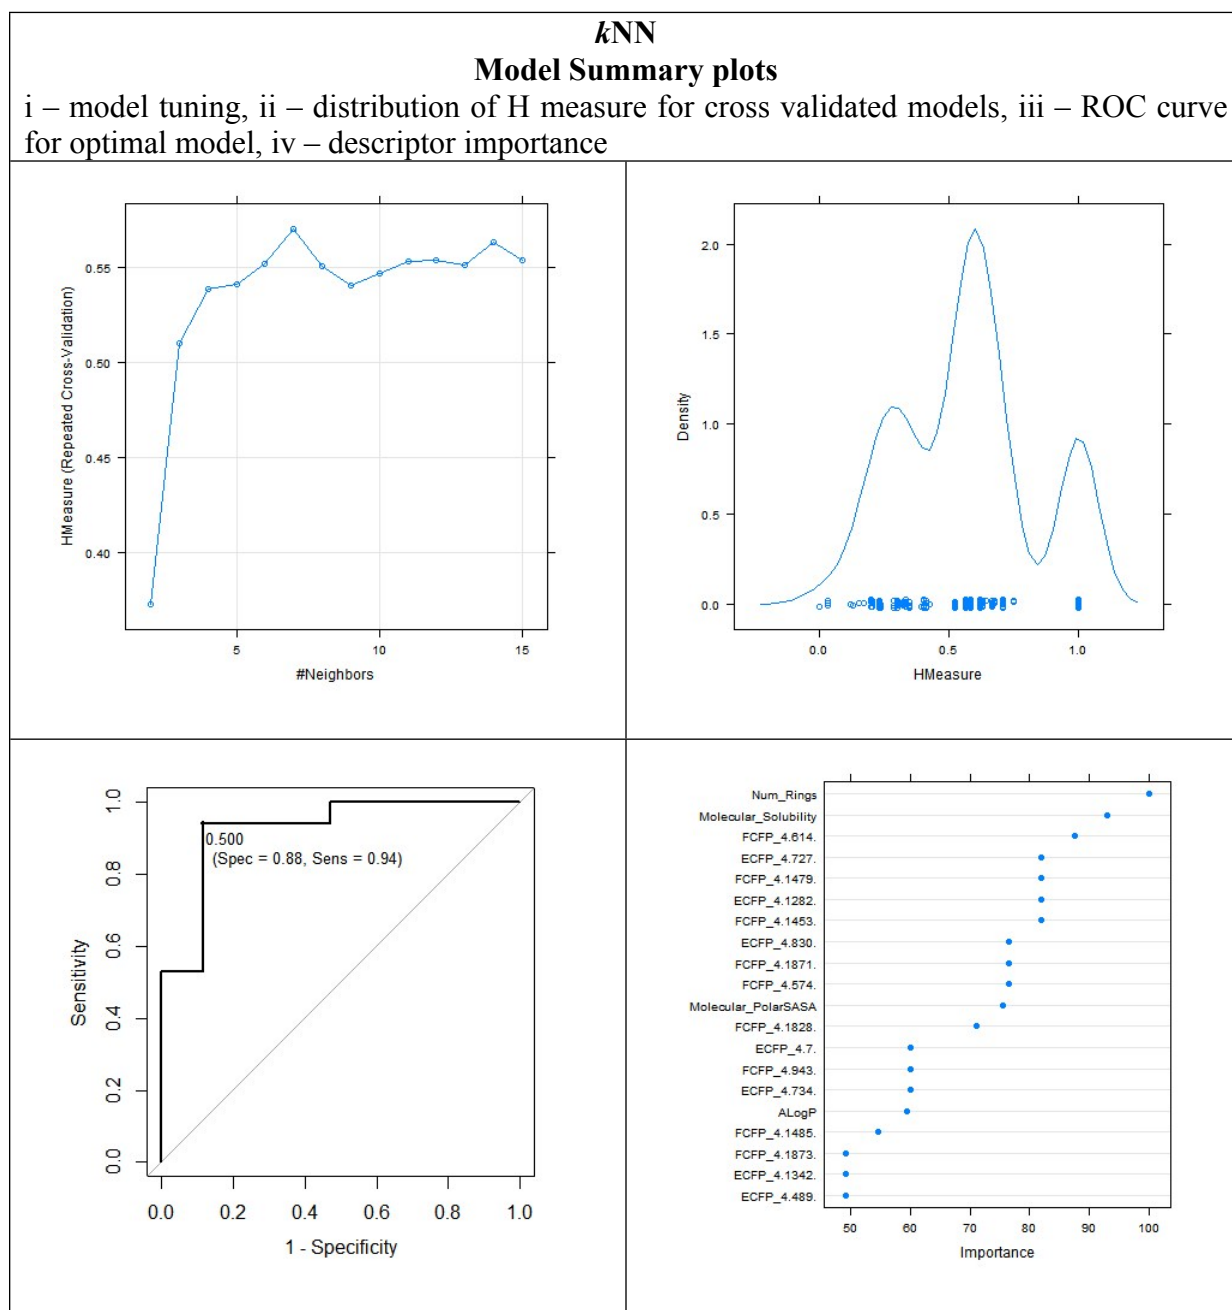

**Figure S7** Model summary plot for the *k*NN model

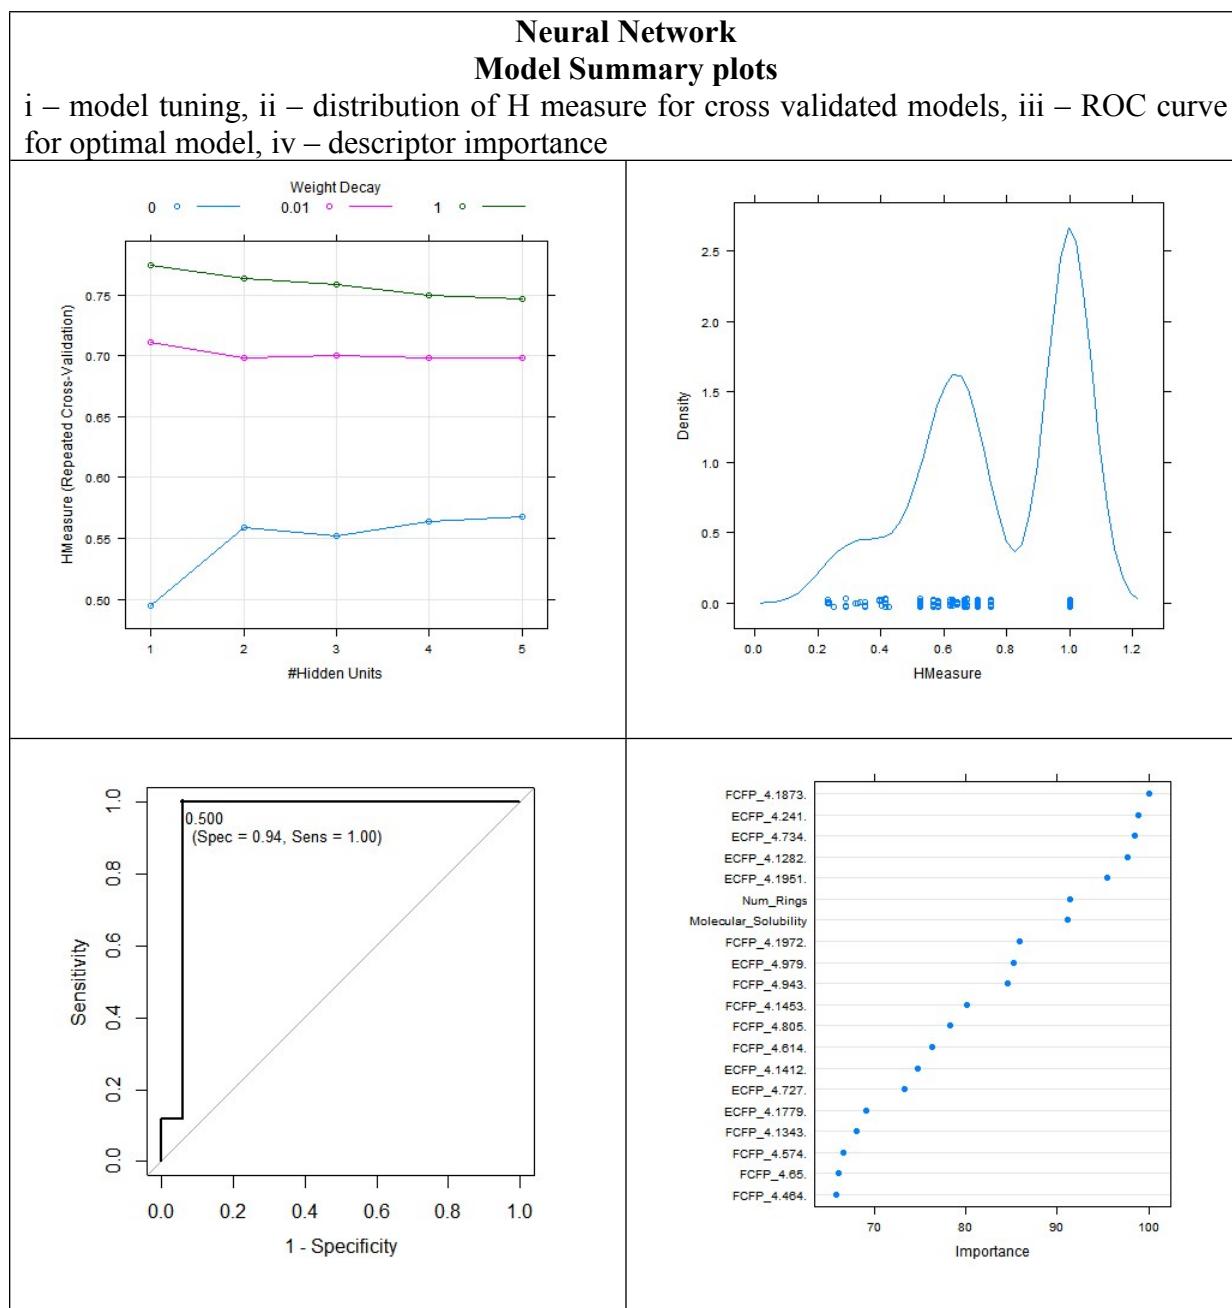

**Figure S8** Model summary plot for the Neural Network model



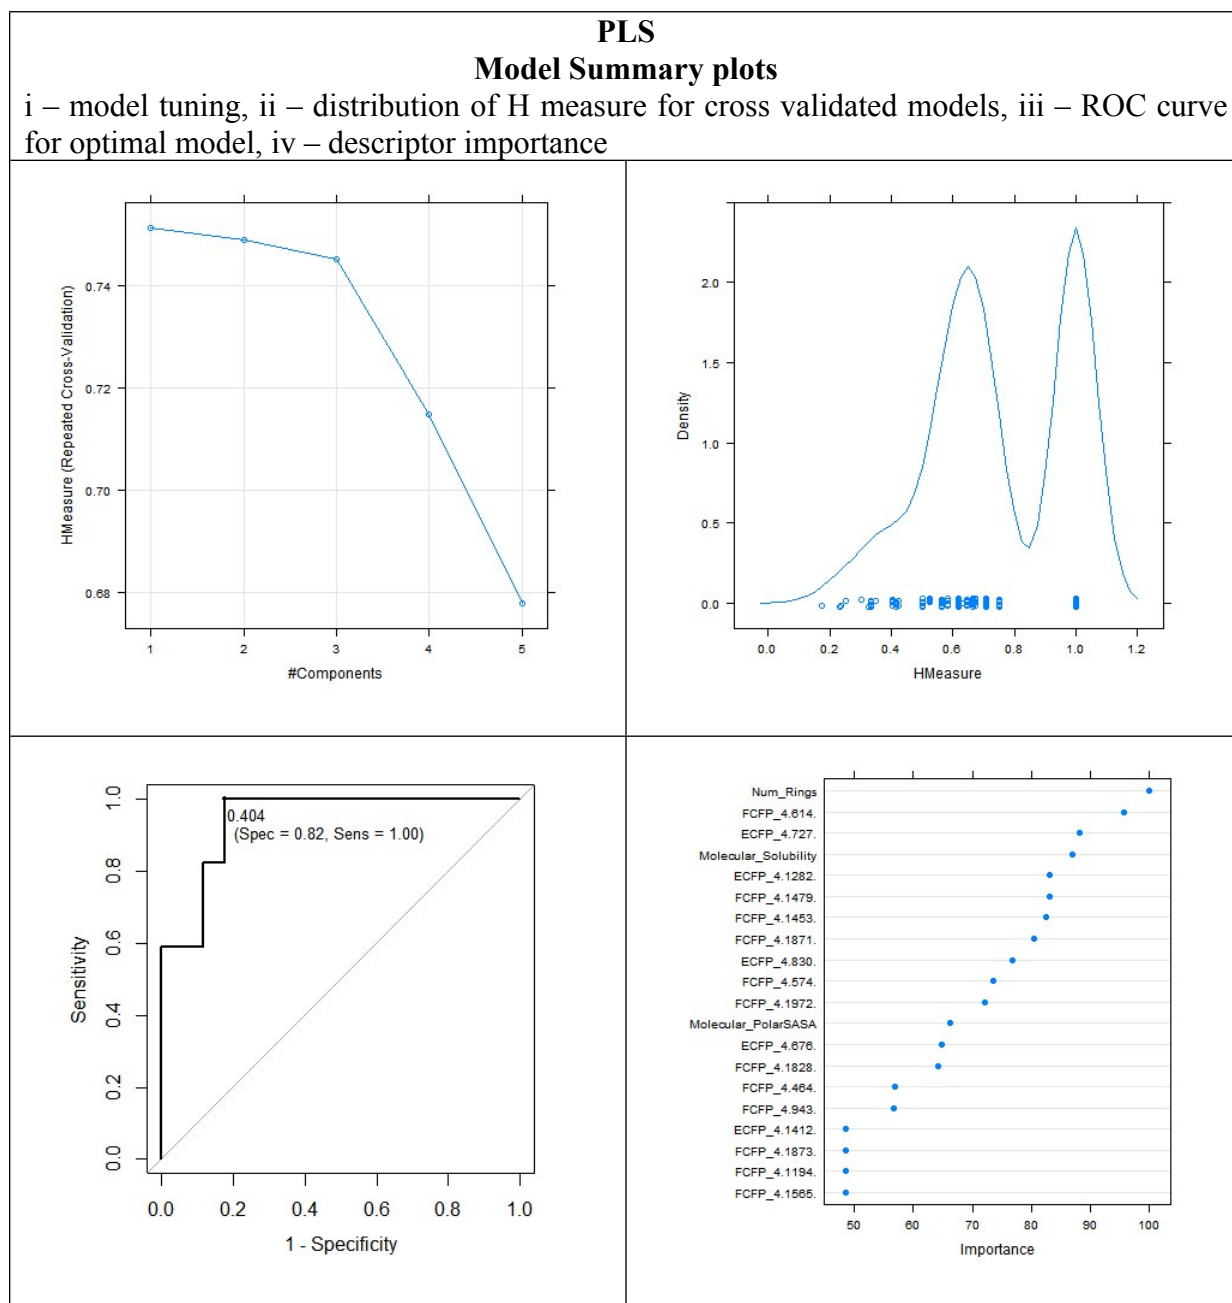

**Figure S9** Model summary plot for the PLS model

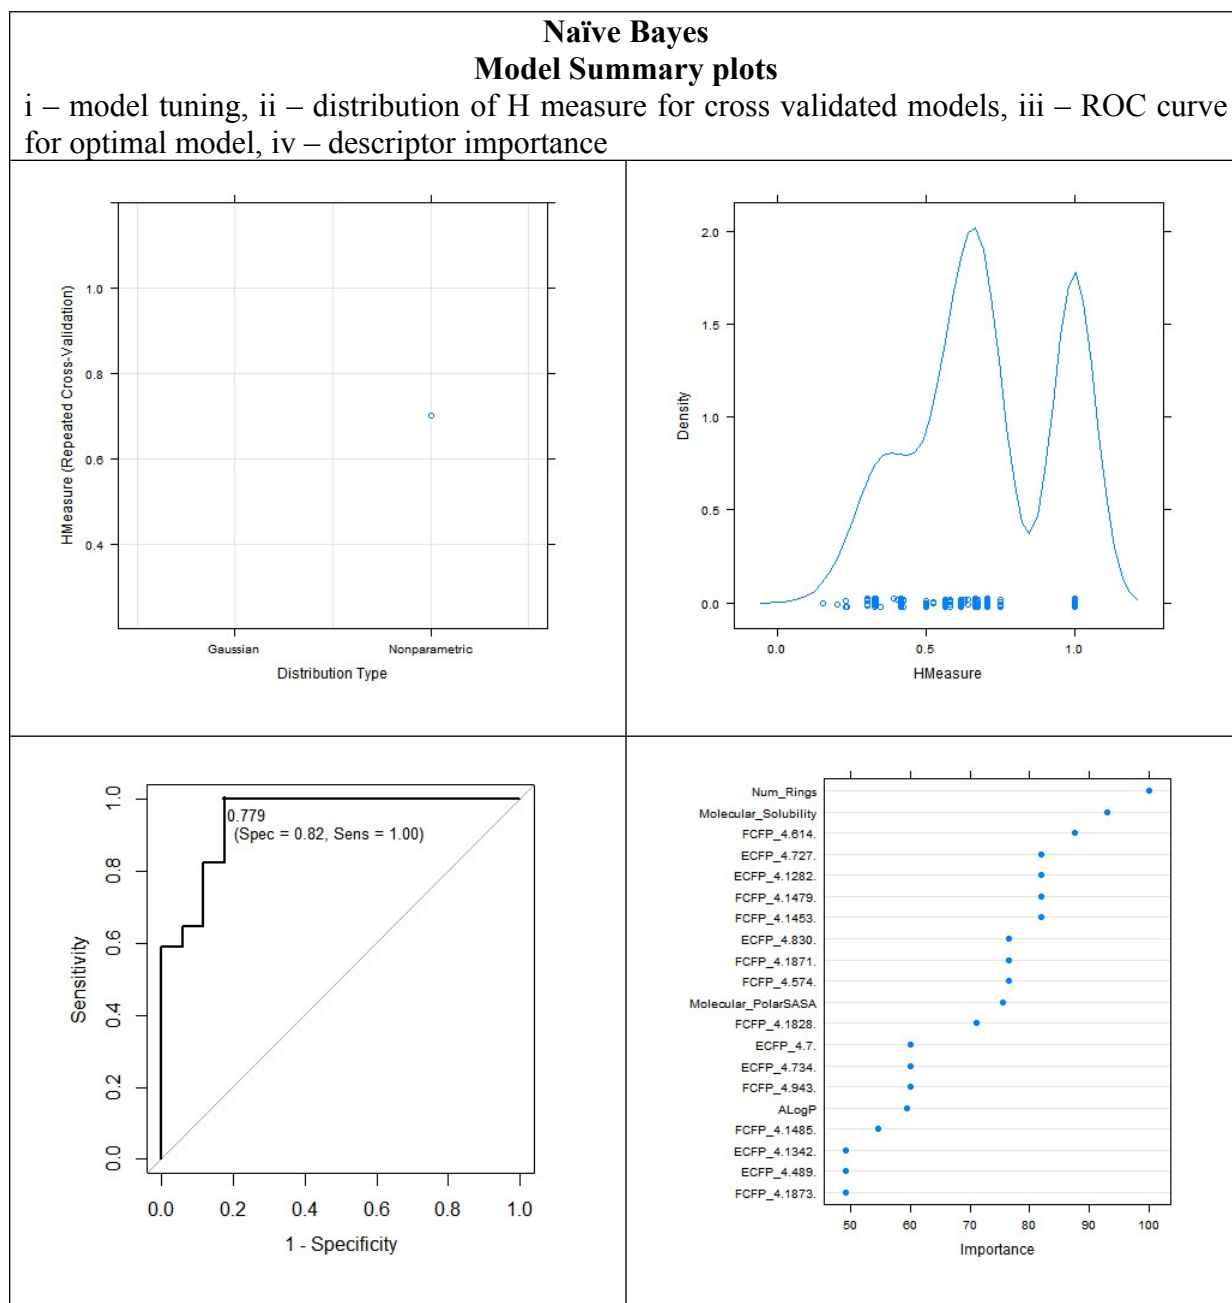

**Figure S10** Model summary plot for the Naïve Bayes model

## C5.0

### Model Summary plots

i – model tuning, ii – distribution of H measure for cross validated models, iii – ROC curve for optimal model, iv – descriptor importance

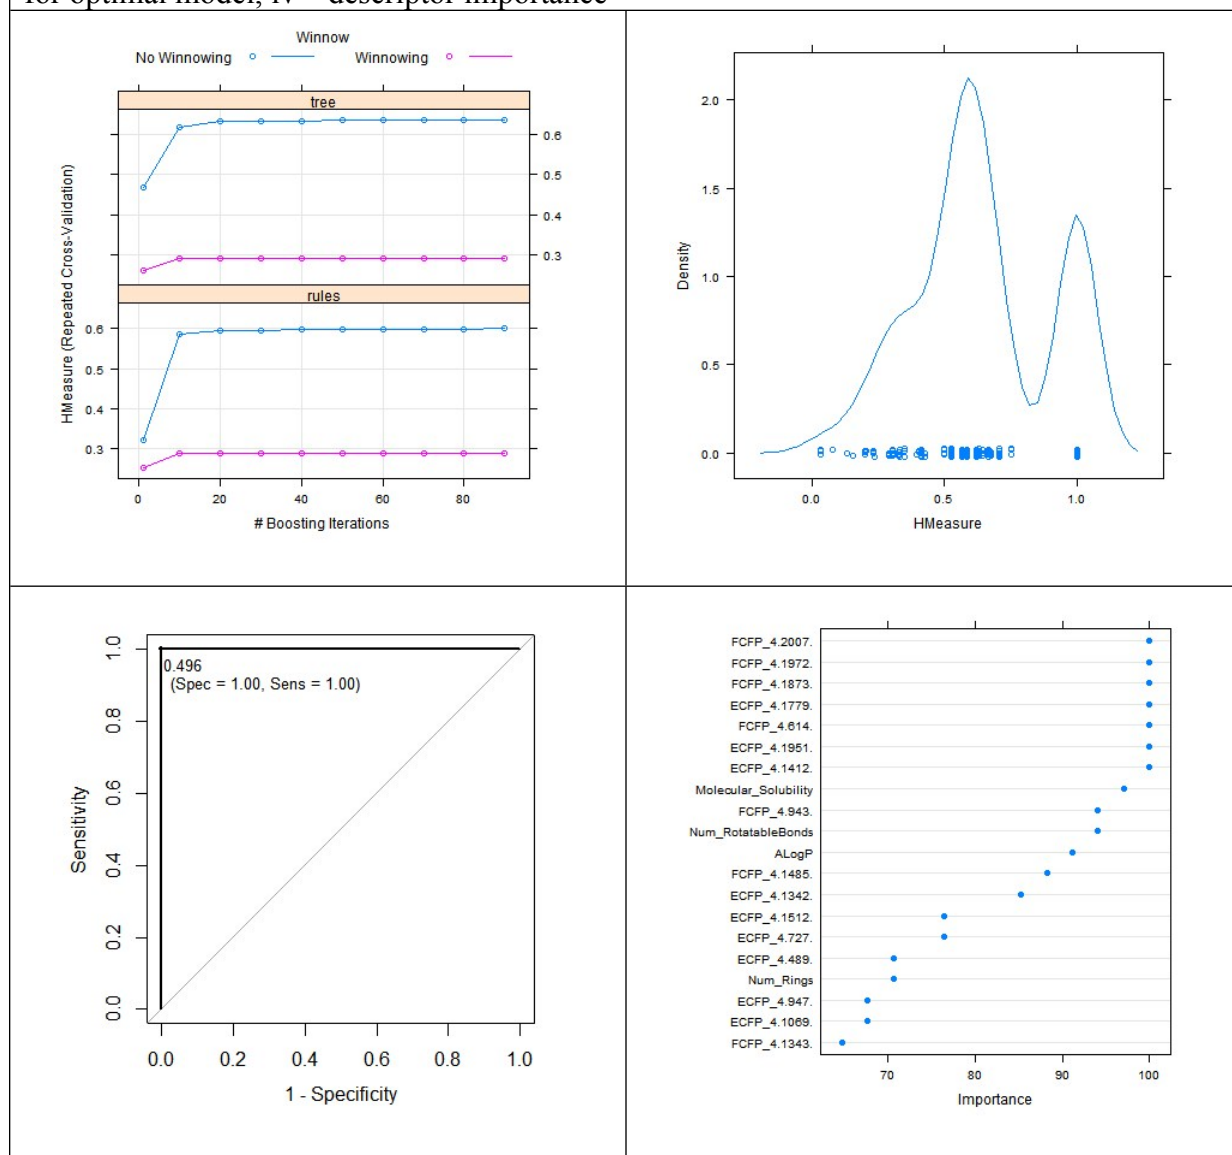

Figure S11 Model summary plot for the C5.0 model

## Flexible Discriminant Analysis Model Summary plots

i – model tuning, ii – distribution of H measure for cross validated models, iii – ROC curve for optimal model, iv – descriptor importance

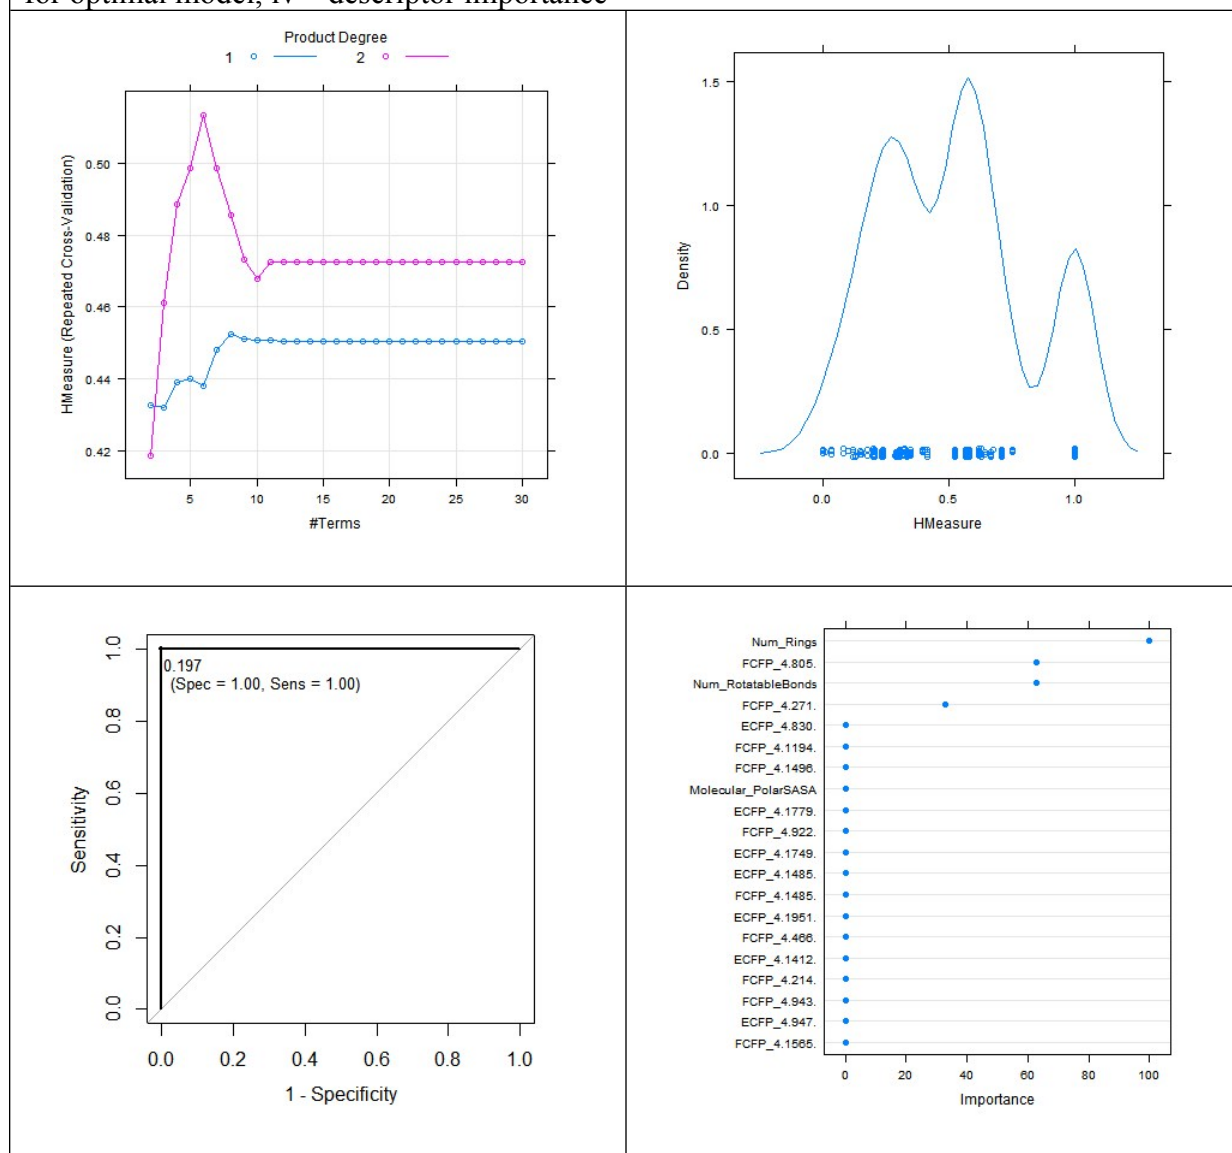

**Figure S12** Model summary plot for the Flexible Discriminant Analysis model

| Performance on external test set of all 21 compounds |       |                   |           |                        |
|------------------------------------------------------|-------|-------------------|-----------|------------------------|
| Method                                               | Kappa | Balanced Accuracy | H measure | Quality of predictions |
| SVM                                                  | 0.577 | 0.816             | 0.778     | Good                   |
| RF                                                   | 0.859 | 0.971             | 0.891     | Good                   |
| kNN                                                  | 0.577 | 0.8324            | 0.587     | Good                   |
| NN                                                   | 0.553 | 0.882             | 1         | Good                   |
| PLS                                                  | 0.411 | 0.824             | 0.729     | Good                   |
| NB                                                   | 0.400 | 0.824             | 0.729     | Good                   |
| C5.0                                                 | 0.013 | 0.507             | 0.198     | Bad                    |

**Table S3** Performance of the models predicting the gelator properties of the 20 external test set compounds both within and outside the model domain of applicability using models generated from true training set data. Green – meets criteria. Red – fails criteria. (Criteria for good:  $H > 0.6$ ,  $Kappa > 0.4$ ,  $Balanced\ accuracy > 0.7$ ).

| Method      | Resampling results<br>of optimal model<br>using scrambled data | Performance of optimal model<br>selected by repeated 5-fold cross-<br>validation |                      |              |                     |
|-------------|----------------------------------------------------------------|----------------------------------------------------------------------------------|----------------------|--------------|---------------------|
|             | H measure $\pm$ SD                                             | Kappa                                                                            | Balanced<br>Accuracy | H<br>measure | Quality of<br>model |
| <b>SVM</b>  | 0.5343 $\pm$ 0.24                                              | 0.235                                                                            | 0.618                | 0.133        | Bad                 |
| <b>RF</b>   | 0.524 $\pm$ 0.24                                               | -0.059                                                                           | 0.471                | 0.109        | Bad                 |
| <b>kNN</b>  | 0.401 $\pm$ 0.25                                               | -0.294                                                                           | 0.353                | 0.231        | Bad                 |
| <b>NN</b>   | 0.517 $\pm$ 0.23                                               | 0.058                                                                            | 0.529                | 0.180        | Bad                 |
| <b>PLS</b>  | 0.565 $\pm$ 0.26                                               | 0.059                                                                            | 0.529                | 0.180        | Bad                 |
| <b>NB</b>   | 0.545 $\pm$ 0.23                                               | 0.146                                                                            | 0.5                  | 0.158        | Bad                 |
| <b>C5.0</b> | 0.481 $\pm$ 0.25                                               | -0.059                                                                           | 0.471                | 0.227        | Bad                 |

**Table S4** Performance of the models generated from scrambled training set data. Green – meets criteria. Red – fails criteria. (Criteria for good: H > 0.6, Kappa > 0.4, Balanced accuracy > 0.7).

| Method | Performance on external test set of 14 compounds within models domain of applicability using models built on randomised data |                   |           |                        |
|--------|------------------------------------------------------------------------------------------------------------------------------|-------------------|-----------|------------------------|
|        | Kappa                                                                                                                        | Balanced Accuracy | H measure | Quality of predictions |
| SVM    | -0.068                                                                                                                       | 0.417             | 0.334     | Bad                    |
| RF     | 0.000                                                                                                                        | 0.500             | 0.315     | Bad                    |
| kNN    | 0.103                                                                                                                        | 0.583             | 0.180     | Bad                    |
| NN     | 0.417                                                                                                                        | 0.708             | 0.396     | Bad                    |
| PLS    | 0.170                                                                                                                        | 0.708             | 0.359     | Bad                    |
| NB     | -0.235                                                                                                                       | 0.333             | 0.406     | Bad                    |
| C5.0   | 0.025                                                                                                                        | 0.541             | 0.007     | Bad                    |

**Table S5** Performance of the models predicting the gelator properties of the 13 external test set compounds within the model domain of applicability using models generated from scrambled training set data. Green – meets criteria. Red – fails criteria. (Criteria for good:  $H > 0.6$ ,  $Kappa > 0.4$ ,  $Balanced\ accuracy > 0.7$ ).

## 2025 Compound Virtual Library

Compound codes in right hand column can be used to request predictions from the authors.

|                                                                                                                 |       |
|-----------------------------------------------------------------------------------------------------------------|-------|
| <chem>C%11(COC1=CC=C(Cl)C2=CC=CC=C21)=O.O=C%10CN%11.O=C(O)CN%10</chem>                                          | 1.1_1 |
| <chem>C%11(COC1=CC=C(Cl)C2=CC=CC=C21)=O.O=C%10CN%11.CC(C)[CH](C(O)=O)N%10</chem>                                | 1.1_2 |
| <chem>C%11(COC1=CC=C(Cl)C2=CC=CC=C21)=O.O=C%10CN%11.CC(C)C[CH](C(O)=O)N%10</chem>                               | 1.1_3 |
| <chem>C%11(COC1=CC=C(Cl)C2=CC=CC=C21)=O.O=C%10CN%11.C[CH](C(O)=O)N%10</chem>                                    | 1.1_4 |
| <chem>C%11(COC1=CC=C(Cl)C2=CC=CC=C21)=O.O=C%10CN%11.O=C(O)[CH](CC1=CC=CC=C1)N%10</chem>                         | 1.1_5 |
| <chem>C%11(COC1=CC=C(Cl)C2=CC=CC=C21)=O.O=C%10CN%11.CC[CH](C)[CH](C(O)=O)N%10</chem>                            | 1.1_6 |
| <chem>C%11(COC1=CC=C(Cl)C2=CC=CC=C21)=O.O=C%10CN%11.CSCC[CH](C(O)=O)N%10</chem>                                 | 1.1_7 |
| <chem>C%11(COC1=CC=C(Cl)C2=CC=CC=C21)=O.O=C%10CN%11.OC(C=C1)=CC=C1C[CH](C(O)=O)N%10</chem>                      | 1.1_8 |
| <chem>C%11(COC1=CC=C(Cl)C2=CC=CC=C21)=O.O=C%10CN%11.O=C(O)[CH](CC1=C(F)C(F)=C(F)C(F)=C1F)N%10</chem>            | 1.1_9 |
| <chem>C%11(COC1=CC=C(Cl)C2=CC=CC=C21)=O.CC(C)[CH](C%10=O)N%11.O=C(O)CN%10</chem>                                | 1.2_1 |
| <chem>C%11(COC1=CC=C(Cl)C2=CC=CC=C21)=O.CC(C)[CH](C%10=O)N%11.CC(C)[CH](C(O)=O)N%10</chem>                      | 1.2_2 |
| <chem>C%11(COC1=CC=C(Cl)C2=CC=CC=C21)=O.CC(C)[CH](C%10=O)N%11.CC(C)C[CH](C(O)=O)N%10</chem>                     | 1.2_3 |
| <chem>C%11(COC1=CC=C(Cl)C2=CC=CC=C21)=O.CC(C)[CH](C%10=O)N%11.C[CH](C(O)=O)N%10</chem>                          | 1.2_4 |
| <chem>C%11(COC1=CC=C(Cl)C2=CC=CC=C21)=O.CC(C)[CH](C%10=O)N%11.O=C(O)[CH](CC1=CC=CC=C1)N%10</chem>               | 1.2_5 |
| <chem>C%11(COC1=CC=C(Cl)C2=CC=CC=C21)=O.CC(C)[CH](C%10=O)N%11.CC[CH](C)[CH](C(O)=O)N%10</chem>                  | 1.2_6 |
| <chem>C%11(COC1=CC=C(Cl)C2=CC=CC=C21)=O.CC(C)[CH](C%10=O)N%11.CSCC[CH](C(O)=O)N%10</chem>                       | 1.2_7 |
| <chem>C%11(COC1=CC=C(Cl)C2=CC=CC=C21)=O.CC(C)[CH](C%10=O)N%11.OC(C=C1)=CC=C1C[CH](C(O)=O)N%10</chem>            | 1.2_8 |
| <chem>C%11(COC1=CC=C(Cl)C2=CC=CC=C21)=O.CC(C)[CH](C%10=O)N%11.O=C(O)[CH](CC1=C(F)C(F)=C(F)C(F)=C1F)N%10</chem>  | 1.2_9 |
| <chem>C%11(COC1=CC=C(Cl)C2=CC=CC=C21)=O.CC(C)C[CH](C%10=O)N%11.O=C(O)CN%10</chem>                               | 1.3_1 |
| <chem>C%11(COC1=CC=C(Cl)C2=CC=CC=C21)=O.CC(C)C[CH](C%10=O)N%11.CC(C)[CH](C(O)=O)N%10</chem>                     | 1.3_2 |
| <chem>C%11(COC1=CC=C(Cl)C2=CC=CC=C21)=O.CC(C)C[CH](C%10=O)N%11.CC(C)C[CH](C(O)=O)N%10</chem>                    | 1.3_3 |
| <chem>C%11(COC1=CC=C(Cl)C2=CC=CC=C21)=O.CC(C)C[CH](C%10=O)N%11.C[CH](C(O)=O)N%10</chem>                         | 1.3_4 |
| <chem>C%11(COC1=CC=C(Cl)C2=CC=CC=C21)=O.CC(C)C[CH](C%10=O)N%11.O=C(O)[CH](CC1=CC=CC=C1)N%10</chem>              | 1.3_5 |
| <chem>C%11(COC1=CC=C(Cl)C2=CC=CC=C21)=O.CC(C)C[CH](C%10=O)N%11.CC[CH](C)[CH](C(O)=O)N%10</chem>                 | 1.3_6 |
| <chem>C%11(COC1=CC=C(Cl)C2=CC=CC=C21)=O.CC(C)C[CH](C%10=O)N%11.CSCC[CH](C(O)=O)N%10</chem>                      | 1.3_7 |
| <chem>C%11(COC1=CC=C(Cl)C2=CC=CC=C21)=O.CC(C)C[CH](C%10=O)N%11.OC(C=C1)=CC=C1C[CH](C(O)=O)N%10</chem>           | 1.3_8 |
| <chem>C%11(COC1=CC=C(Cl)C2=CC=CC=C21)=O.CC(C)C[CH](C%10=O)N%11.O=C(O)[CH](CC1=C(F)C(F)=C(F)C(F)=C1F)N%10</chem> | 1.3_9 |



|                                                                                                          |       |
|----------------------------------------------------------------------------------------------------------|-------|
| C%11(COC1=CC=C(Cl)C2=CC=CC=C21)=O.C[CH](C%10=O)N%11.O=C(O)CN%10                                          | 1.4_1 |
| C%11(COC1=CC=C(Cl)C2=CC=CC=C21)=O.C[CH](C%10=O)N%11.CC(C)[CH](C(O)=O)N%10                                | 1.4_2 |
| C%11(COC1=CC=C(Cl)C2=CC=CC=C21)=O.C[CH](C%10=O)N%11.CC(C)C[CH](C(O)=O)N%10                               | 1.4_3 |
| C%11(COC1=CC=C(Cl)C2=CC=CC=C21)=O.C[CH](C%10=O)N%11.C[CH](C(O)=O)N%10                                    | 1.4_4 |
| C%11(COC1=CC=C(Cl)C2=CC=CC=C21)=O.C[CH](C%10=O)N%11.O=C(O)[CH](CC1=CC=CC=C1)N%10                         | 1.4_5 |
| C%11(COC1=CC=C(Cl)C2=CC=CC=C21)=O.C[CH](C%10=O)N%11.CC[CH](C)[CH](C(O)=O)N%10                            | 1.4_6 |
| C%11(COC1=CC=C(Cl)C2=CC=CC=C21)=O.C[CH](C%10=O)N%11.CSCC[CH](C(O)=O)N%10                                 | 1.4_7 |
| C%11(COC1=CC=C(Cl)C2=CC=CC=C21)=O.C[CH](C%10=O)N%11.OC(C=C1)=CC=C1C[CH](C(O)=O)N%10                      | 1.4_8 |
| C%11(COC1=CC=C(Cl)C2=CC=CC=C21)=O.C[CH](C%10=O)N%11.O=C(O)[CH](CC1=C(F)C(F)=C(F)C(F)=C1F)N%10            | 1.4_9 |
| C%11(COC1=CC=C(Cl)C2=CC=CC=C21)=O.O=C%10[CH](CC1=CC=CC=C1)N%11.O=C(O)CN%10                               | 1.5_1 |
| C%11(COC1=CC=C(Cl)C2=CC=CC=C21)=O.O=C%10[CH](CC1=CC=CC=C1)N%11.CC(C)[CH](C(O)=O)N%10                     | 1.5_2 |
| C%11(COC1=CC=C(Cl)C2=CC=CC=C21)=O.O=C%10[CH](CC1=CC=CC=C1)N%11.CC(C)C[CH](C(O)=O)N%10                    | 1.5_3 |
| C%11(COC1=CC=C(Cl)C2=CC=CC=C21)=O.O=C%10[CH](CC1=CC=CC=C1)N%11.C[CH](C(O)=O)N%10                         | 1.5_4 |
| C%11(COC1=CC=C(Cl)C2=CC=CC=C21)=O.O=C%10[CH](CC1=CC=CC=C1)N%11.O=C(O)[CH](CC1=CC=CC=C1)N%10              | 1.5_5 |
| C%11(COC1=CC=C(Cl)C2=CC=CC=C21)=O.O=C%10[CH](CC1=CC=CC=C1)N%11.CC[CH](C)[CH](C(O)=O)N%10                 | 1.5_6 |
| C%11(COC1=CC=C(Cl)C2=CC=CC=C21)=O.O=C%10[CH](CC1=CC=CC=C1)N%11.CSCC[CH](C(O)=O)N%10                      | 1.5_7 |
| C%11(COC1=CC=C(Cl)C2=CC=CC=C21)=O.O=C%10[CH](CC1=CC=CC=C1)N%11.OC(C=C1)=CC=C1C[CH](C(O)=O)N%10           | 1.5_8 |
| C%11(COC1=CC=C(Cl)C2=CC=CC=C21)=O.O=C%10[CH](CC1=CC=CC=C1)N%11.O=C(O)[CH](CC1=C(F)C(F)=C(F)C(F)=C1F)N%10 | 1.5_9 |
| C%11(COC1=CC=C(Cl)C2=CC=CC=C21)=O.CC[CH](C)[CH](C%10=O)N%11.O=C(O)CN%10                                  | 1.6_1 |
| C%11(COC1=CC=C(Cl)C2=CC=CC=C21)=O.CC[CH](C)[CH](C%10=O)N%11.CC(C)[CH](C(O)=O)N%10                        | 1.6_2 |
| C%11(COC1=CC=C(Cl)C2=CC=CC=C21)=O.CC[CH](C)[CH](C%10=O)N%11.CC(C)C[CH](C(O)=O)N%10                       | 1.6_3 |
| C%11(COC1=CC=C(Cl)C2=CC=CC=C21)=O.CC[CH](C)[CH](C%10=O)N%11.C[CH](C(O)=O)N%10                            | 1.6_4 |
| C%11(COC1=CC=C(Cl)C2=CC=CC=C21)=O.CC[CH](C)[CH](C%10=O)N%11.O=C(O)[CH](CC1=CC=CC=C1)N%10                 | 1.6_5 |
| C%11(COC1=CC=C(Cl)C2=CC=CC=C21)=O.CC[CH](C)[CH](C%10=O)N%11.CC[CH](C)[CH](C(O)=O)N%10                    | 1.6_6 |
| C%11(COC1=CC=C(Cl)C2=CC=CC=C21)=O.CC[CH](C)[CH](C%10=O)N%11.CSCC[CH](C(O)=O)N%10                         | 1.6_7 |
| C%11(COC1=CC=C(Cl)C2=CC=CC=C21)=O.CC[CH](C)[CH](C%10=O)N%11.OC(C=C1)=CC=C1C[CH](C(O)=O)N%10              | 1.6_8 |
| C%11(COC1=CC=C(Cl)C2=CC=CC=C21)=O.CC[CH](C)[CH](C%10=O)N%11.O=C(O)[CH](CC1=C(F)C(F)=C(F)C(F)=C1F)N%10    | 1.6_9 |

|                                                                                                             |       |
|-------------------------------------------------------------------------------------------------------------|-------|
| C%11(COC1=CC=C(Cl)C2=CC=CC=C21)=O.CSCC[CH](C%10=O)N%11.O=C(O)CN%10                                          | 1.7_1 |
| C%11(COC1=CC=C(Cl)C2=CC=CC=C21)=O.CSCC[CH](C%10=O)N%11.CC(C)[CH](C(O)=O)N%10                                | 1.7_2 |
| C%11(COC1=CC=C(Cl)C2=CC=CC=C21)=O.CSCC[CH](C%10=O)N%11.CC(C)C[CH](C(O)=O)N%10                               | 1.7_3 |
| C%11(COC1=CC=C(Cl)C2=CC=CC=C21)=O.CSCC[CH](C%10=O)N%11.C[CH](C(O)=O)N%10                                    | 1.7_4 |
| C%11(COC1=CC=C(Cl)C2=CC=CC=C21)=O.CSCC[CH](C%10=O)N%11.O=C(O)[CH](CC1=CC=CC=C1)N%10                         | 1.7_5 |
| C%11(COC1=CC=C(Cl)C2=CC=CC=C21)=O.CSCC[CH](C%10=O)N%11.CC[CH](C)[CH](C(O)=O)N%10                            | 1.7_6 |
| C%11(COC1=CC=C(Cl)C2=CC=CC=C21)=O.CSCC[CH](C%10=O)N%11.CSCC[CH](C(O)=O)N%10                                 | 1.7_7 |
| C%11(COC1=CC=C(Cl)C2=CC=CC=C21)=O.CSCC[CH](C%10=O)N%11.OC(C=C1)=CC=C1C[CH](C(O)=O)N%10                      | 1.7_8 |
| C%11(COC1=CC=C(Cl)C2=CC=CC=C21)=O.CSCC[CH](C%10=O)N%11.O=C(O)[CH](CC1=C(F)C(F)=C(F)C(F)=C1F)N%10            | 1.7_9 |
| C%11(COC1=CC=C(Cl)C2=CC=CC=C21)=O.OC(C=C1)=CC=C1C[CH](C%10=O)N%11.O=C(O)CN%10                               | 1.8_1 |
| C%11(COC1=CC=C(Cl)C2=CC=CC=C21)=O.OC(C=C1)=CC=C1C[CH](C%10=O)N%11.CC(C)[CH](C(O)=O)N%10                     | 1.8_2 |
| C%11(COC1=CC=C(Cl)C2=CC=CC=C21)=O.OC(C=C1)=CC=C1C[CH](C%10=O)N%11.CC(C)C[CH](C(O)=O)N%10                    | 1.8_3 |
| C%11(COC1=CC=C(Cl)C2=CC=CC=C21)=O.OC(C=C1)=CC=C1C[CH](C%10=O)N%11.C[CH](C(O)=O)N%10                         | 1.8_4 |
| C%11(COC1=CC=C(Cl)C2=CC=CC=C21)=O.OC(C=C1)=CC=C1C[CH](C%10=O)N%11.O=C(O)[CH](CC1=CC=CC=C1)N%10              | 1.8_5 |
| C%11(COC1=CC=C(Cl)C2=CC=CC=C21)=O.OC(C=C1)=CC=C1C[CH](C%10=O)N%11.CC[CH](C)[CH](C(O)=O)N%10                 | 1.8_6 |
| C%11(COC1=CC=C(Cl)C2=CC=CC=C21)=O.OC(C=C1)=CC=C1C[CH](C%10=O)N%11.CSCC[CH](C(O)=O)N%10                      | 1.8_7 |
| C%11(COC1=CC=C(Cl)C2=CC=CC=C21)=O.OC(C=C1)=CC=C1C[CH](C%10=O)N%11.OC(C=C1)=CC=C1C[CH](C(O)=O)N%10           | 1.8_8 |
| C%11(COC1=CC=C(Cl)C2=CC=CC=C21)=O.OC(C=C1)=CC=C1C[CH](C%10=O)N%11.O=C(O)[CH](CC1=C(F)C(F)=C(F)C(F)=C1F)N%10 | 1.8_9 |
| C%10(COC1=CC=C(Cl)C2=CC=CC=C21)=O.O=C(O)CN%10                                                               | 1.9_1 |
| C%10(COC1=CC=C(Cl)C2=CC=CC=C21)=O.CC(C)[CH](C(O)=O)N%10                                                     | 1.9_2 |
| C%10(COC1=CC=C(Cl)C2=CC=CC=C21)=O.CC(C)C[CH](C(O)=O)N%10                                                    | 1.9_3 |
| C%10(COC1=CC=C(Cl)C2=CC=CC=C21)=O.C[CH](C(O)=O)N%10                                                         | 1.9_4 |
| C%10(COC1=CC=C(Cl)C2=CC=CC=C21)=O.O=C(O)[CH](CC1=CC=CC=C1)N%10                                              | 1.9_5 |
| C%10(COC1=CC=C(Cl)C2=CC=CC=C21)=O.CC[CH](C)[CH](C(O)=O)N%10                                                 | 1.9_6 |
| C%10(COC1=CC=C(Cl)C2=CC=CC=C21)=O.CSCC[CH](C(O)=O)N%10                                                      | 1.9_7 |
| C%10(COC1=CC=C(Cl)C2=CC=CC=C21)=O.OC(C=C1)=CC=C1C[CH](C(O)=O)N%10                                           | 1.9_8 |
| C%10(COC1=CC=C(Cl)C2=CC=CC=C21)=O.O=C(O)[CH](CC1=C(F)C(F)=C(F)C(F)=C1F)N%10                                 | 1.9_9 |
| ClC1=CC(OCC%11=O)=CC2=CC=CC=C21.O=C%10CN%11.O=C(O)CN%10                                                     | 2.1_1 |
| ClC1=CC(OCC%11=O)=CC2=CC=CC=C21.O=C%10CN%11.CC(C)[CH](C(O)=O)N%10                                           | 2.1_2 |
| ClC1=CC(OCC%11=O)=CC2=CC=CC=C21.O=C%10CN%11.CC(C)C[CH](C(O)=O)N%10                                          | 2.1_3 |
| ClC1=CC(OCC%11=O)=CC2=CC=CC=C21.O=C%10CN%11.C[CH](C(O)=O)N%10                                               | 2.1_4 |

|                                                                                                  |       |
|--------------------------------------------------------------------------------------------------|-------|
| C1C1=CC(OCC%11=O)=CC2=CC=CC=C21.O=C%10CN%11.O=C(O)[CH](CC1=CC=CC=C1)N%10                         | 2.1_5 |
| C1C1=CC(OCC%11=O)=CC2=CC=CC=C21.O=C%10CN%11.CC[CH](C)[CH](C(O)=O)N%10                            | 2.1_6 |
| C1C1=CC(OCC%11=O)=CC2=CC=CC=C21.O=C%10CN%11.CSCC[CH](C(O)=O)N%10                                 | 2.1_7 |
| C1C1=CC(OCC%11=O)=CC2=CC=CC=C21.O=C%10CN%11.OC(C=C1)=CC=C1C[CH](C(O)=O)N%10                      | 2.1_8 |
| C1C1=CC(OCC%11=O)=CC2=CC=CC=C21.O=C%10CN%11.O=C(O)[CH](CC1=C(F)C(F)=C(F)C(F)=C1F)N%10            | 2.1_9 |
| C1C1=CC(OCC%11=O)=CC2=CC=CC=C21.CC(C)[CH](C%10=O)N%11.O=C(O)CN%10                                | 2.2_1 |
| C1C1=CC(OCC%11=O)=CC2=CC=CC=C21.CC(C)[CH](C%10=O)N%11.CC(C)[CH](C(O)=O)N%10                      | 2.2_2 |
| C1C1=CC(OCC%11=O)=CC2=CC=CC=C21.CC(C)[CH](C%10=O)N%11.CC(C)C[CH](C(O)=O)N%10                     | 2.2_3 |
| C1C1=CC(OCC%11=O)=CC2=CC=CC=C21.CC(C)[CH](C%10=O)N%11.C[CH](C(O)=O)N%10                          | 2.2_4 |
| C1C1=CC(OCC%11=O)=CC2=CC=CC=C21.CC(C)[CH](C%10=O)N%11.O=C(O)[CH](CC1=CC=CC=C1)N%10               | 2.2_5 |
| C1C1=CC(OCC%11=O)=CC2=CC=CC=C21.CC(C)[CH](C%10=O)N%11.CC[CH](C)[CH](C(O)=O)N%10                  | 2.2_6 |
| C1C1=CC(OCC%11=O)=CC2=CC=CC=C21.CC(C)[CH](C%10=O)N%11.CSCC[CH](C(O)=O)N%10                       | 2.2_7 |
| C1C1=CC(OCC%11=O)=CC2=CC=CC=C21.CC(C)[CH](C%10=O)N%11.OC(C=C1)=CC=C1C[CH](C(O)=O)N%10            | 2.2_8 |
| C1C1=CC(OCC%11=O)=CC2=CC=CC=C21.CC(C)[CH](C%10=O)N%11.O=C(O)[CH](CC1=C(F)C(F)=C(F)C(F)=C1F)N%10  | 2.2_9 |
| C1C1=CC(OCC%11=O)=CC2=CC=CC=C21.CC(C)C[CH](C%10=O)N%11.O=C(O)CN%10                               | 2.3_1 |
| C1C1=CC(OCC%11=O)=CC2=CC=CC=C21.CC(C)C[CH](C%10=O)N%11.CC(C)[CH](C(O)=O)N%10                     | 2.3_2 |
| C1C1=CC(OCC%11=O)=CC2=CC=CC=C21.CC(C)C[CH](C%10=O)N%11.CC(C)C[CH](C(O)=O)N%10                    | 2.3_3 |
| C1C1=CC(OCC%11=O)=CC2=CC=CC=C21.CC(C)C[CH](C%10=O)N%11.C[CH](C(O)=O)N%10                         | 2.3_4 |
| C1C1=CC(OCC%11=O)=CC2=CC=CC=C21.CC(C)C[CH](C%10=O)N%11.O=C(O)[CH](CC1=CC=CC=C1)N%10              | 2.3_5 |
| C1C1=CC(OCC%11=O)=CC2=CC=CC=C21.CC(C)C[CH](C%10=O)N%11.CC[CH](C)[CH](C(O)=O)N%10                 | 2.3_6 |
| C1C1=CC(OCC%11=O)=CC2=CC=CC=C21.CC(C)C[CH](C%10=O)N%11.CSCC[CH](C(O)=O)N%10                      | 2.3_7 |
| C1C1=CC(OCC%11=O)=CC2=CC=CC=C21.CC(C)C[CH](C%10=O)N%11.OC(C=C1)=CC=C1C[CH](C(O)=O)N%10           | 2.3_8 |
| C1C1=CC(OCC%11=O)=CC2=CC=CC=C21.CC(C)C[CH](C%10=O)N%11.O=C(O)[CH](CC1=C(F)C(F)=C(F)C(F)=C1F)N%10 | 2.3_9 |
| C1C1=CC(OCC%11=O)=CC2=CC=CC=C21.C[CH](C%10=O)N%11.O=C(O)CN%10                                    | 2.4_1 |
| C1C1=CC(OCC%11=O)=CC2=CC=CC=C21.C[CH](C%10=O)N%11.CC(C)[CH](C(O)=O)N%10                          | 2.4_2 |
| C1C1=CC(OCC%11=O)=CC2=CC=CC=C21.C[CH](C%10=O)N%11.CC(C)C[CH](C(O)=O)N%10                         | 2.4_3 |
| C1C1=CC(OCC%11=O)=CC2=CC=CC=C21.C[CH](C%10=O)N%11.C[CH](C(O)=O)N%10                              | 2.4_4 |
| C1C1=CC(OCC%11=O)=CC2=CC=CC=C21.C[CH](C%10=O)N%11.O=C(O)[CH](CC1=CC=CC=C1)N%10                   | 2.4_5 |
| C1C1=CC(OCC%11=O)=CC2=CC=CC=C21.C[CH](C%10=O)N%11.CC[CH](C)[CH](C(O)=O)N%10                      | 2.4_6 |

|                                                                                                        |       |
|--------------------------------------------------------------------------------------------------------|-------|
| C1C1=CC(OCC%11=O)=CC2=CC=CC=C21.C[CH](C%10=O)N%11.CSCC[CH](C(O)=O)N%10                                 | 2.4_7 |
| C1C1=CC(OCC%11=O)=CC2=CC=CC=C21.C[CH](C%10=O)N%11.OC(C=C1)=CC=C1C[CH](C(O)=O)N%10                      | 2.4_8 |
| C1C1=CC(OCC%11=O)=CC2=CC=CC=C21.C[CH](C%10=O)N%11.O=C(O)[CH](CC1=C(F)C(F)=C(F)C(F)=C1F)N%10            | 2.4_9 |
| C1C1=CC(OCC%11=O)=CC2=CC=CC=C21.O=C%10[CH](CC1=CC=CC=C1)N%11.O=C(O)CN%10                               | 2.5_1 |
| C1C1=CC(OCC%11=O)=CC2=CC=CC=C21.O=C%10[CH](CC1=CC=CC=C1)N%11.CC(C)[CH](C(O)=O)N%10                     | 2.5_2 |
| C1C1=CC(OCC%11=O)=CC2=CC=CC=C21.O=C%10[CH](CC1=CC=CC=C1)N%11.CC(C)C[CH](C(O)=O)N%10                    | 2.5_3 |
| C1C1=CC(OCC%11=O)=CC2=CC=CC=C21.O=C%10[CH](CC1=CC=CC=C1)N%11.C[CH](C(O)=O)N%10                         | 2.5_4 |
| C1C1=CC(OCC%11=O)=CC2=CC=CC=C21.O=C%10[CH](CC1=CC=CC=C1)N%11.O=C(O)[CH](CC1=CC=CC=C1)N%10              | 2.5_5 |
| C1C1=CC(OCC%11=O)=CC2=CC=CC=C21.O=C%10[CH](CC1=CC=CC=C1)N%11.CC[CH](C)[CH](C(O)=O)N%10                 | 2.5_6 |
| C1C1=CC(OCC%11=O)=CC2=CC=CC=C21.O=C%10[CH](CC1=CC=CC=C1)N%11.CSCC[CH](C(O)=O)N%10                      | 2.5_7 |
| C1C1=CC(OCC%11=O)=CC2=CC=CC=C21.O=C%10[CH](CC1=CC=CC=C1)N%11.OC(C=C1)=CC=C1C[CH](C(O)=O)N%10           | 2.5_8 |
| C1C1=CC(OCC%11=O)=CC2=CC=CC=C21.O=C%10[CH](CC1=CC=CC=C1)N%11.O=C(O)[CH](CC1=C(F)C(F)=C(F)C(F)=C1F)N%10 | 2.5_9 |
| C1C1=CC(OCC%11=O)=CC2=CC=CC=C21.CC[CH](C)[CH](C%10=O)N%11.O=C(O)CN%10                                  | 2.6_1 |
| C1C1=CC(OCC%11=O)=CC2=CC=CC=C21.CC[CH](C)[CH](C%10=O)N%11.CC(C)[CH](C(O)=O)N%10                        | 2.6_2 |
| C1C1=CC(OCC%11=O)=CC2=CC=CC=C21.CC[CH](C)[CH](C%10=O)N%11.CC(C)C[CH](C(O)=O)N%10                       | 2.6_3 |
| C1C1=CC(OCC%11=O)=CC2=CC=CC=C21.CC[CH](C)[CH](C%10=O)N%11.C[CH](C(O)=O)N%10                            | 2.6_4 |
| C1C1=CC(OCC%11=O)=CC2=CC=CC=C21.CC[CH](C)[CH](C%10=O)N%11.O=C(O)[CH](CC1=CC=CC=C1)N%10                 | 2.6_5 |
| C1C1=CC(OCC%11=O)=CC2=CC=CC=C21.CC[CH](C)[CH](C%10=O)N%11.CC[CH](C)[CH](C(O)=O)N%10                    | 2.6_6 |
| C1C1=CC(OCC%11=O)=CC2=CC=CC=C21.CC[CH](C)[CH](C%10=O)N%11.CSCC[CH](C(O)=O)N%10                         | 2.6_7 |
| C1C1=CC(OCC%11=O)=CC2=CC=CC=C21.CC[CH](C)[CH](C%10=O)N%11.OC(C=C1)=CC=C1C[CH](C(O)=O)N%10              | 2.6_8 |
| C1C1=CC(OCC%11=O)=CC2=CC=CC=C21.CC[CH](C)[CH](C%10=O)N%11.O=C(O)[CH](CC1=C(F)C(F)=C(F)C(F)=C1F)N%10    | 2.6_9 |
| C1C1=CC(OCC%11=O)=CC2=CC=CC=C21.CSCC[CH](C%10=O)N%11.O=C(O)CN%10                                       | 2.7_1 |
| C1C1=CC(OCC%11=O)=CC2=CC=CC=C21.CSCC[CH](C%10=O)N%11.CC(C)[CH](C(O)=O)N%10                             | 2.7_2 |
| C1C1=CC(OCC%11=O)=CC2=CC=CC=C21.CSCC[CH](C%10=O)N%11.CC(C)C[CH](C(O)=O)N%10                            | 2.7_3 |
| C1C1=CC(OCC%11=O)=CC2=CC=CC=C21.CSCC[CH](C%10=O)N%11.C[CH](C(O)=O)N%10                                 | 2.7_4 |
| C1C1=CC(OCC%11=O)=CC2=CC=CC=C21.CSCC[CH](C%10=O)N%11.O=C(O)[CH](CC1=CC=C(C=C1)N%10                     | 2.7_5 |
| C1C1=CC(OCC%11=O)=CC2=CC=CC=C21.CSCC[CH](C%10=O)N%11.CC[CH](C)[CH](C(O)=O)                             | 2.7_6 |

|                                                                                                           |       |
|-----------------------------------------------------------------------------------------------------------|-------|
| N%10                                                                                                      |       |
| C1C1=CC(OCC%11=O)=CC2=CC=CC=C21.CSCC[CH](C%10=O)N%11.CSCC[CH](C(O)=O)N%10                                 | 2.7_7 |
| C1C1=CC(OCC%11=O)=CC2=CC=CC=C21.CSCC[CH](C%10=O)N%11.OC(C=C1)=CC=C1C[CH](C(O)=O)N%10                      | 2.7_8 |
| C1C1=CC(OCC%11=O)=CC2=CC=CC=C21.CSCC[CH](C%10=O)N%11.O=C(O)[CH](CC1=C(F)C(F)=C(F)C(F)=C1F)N%10            | 2.7_9 |
| C1C1=CC(OCC%11=O)=CC2=CC=CC=C21.OC(C=C1)=CC=C1C[CH](C%10=O)N%11.O=C(O)CN%10                               | 2.8_1 |
| C1C1=CC(OCC%11=O)=CC2=CC=CC=C21.OC(C=C1)=CC=C1C[CH](C%10=O)N%11.CC(C)[CH](C(O)=O)N%10                     | 2.8_2 |
| C1C1=CC(OCC%11=O)=CC2=CC=CC=C21.OC(C=C1)=CC=C1C[CH](C%10=O)N%11.CC(C)C[CH](C(O)=O)N%10                    | 2.8_3 |
| C1C1=CC(OCC%11=O)=CC2=CC=CC=C21.OC(C=C1)=CC=C1C[CH](C%10=O)N%11.C[CH](C(O)=O)N%10                         | 2.8_4 |
| C1C1=CC(OCC%11=O)=CC2=CC=CC=C21.OC(C=C1)=CC=C1C[CH](C%10=O)N%11.O=C(O)[CH](CC1=CC=CC=C1)N%10              | 2.8_5 |
| C1C1=CC(OCC%11=O)=CC2=CC=CC=C21.OC(C=C1)=CC=C1C[CH](C%10=O)N%11.CC[CH](C)[CH](C(O)=O)N%10                 | 2.8_6 |
| C1C1=CC(OCC%11=O)=CC2=CC=CC=C21.OC(C=C1)=CC=C1C[CH](C%10=O)N%11.CSCC[CH](C(O)=O)N%10                      | 2.8_7 |
| C1C1=CC(OCC%11=O)=CC2=CC=CC=C21.OC(C=C1)=CC=C1C[CH](C%10=O)N%11.OC(C=C1)=CC=C1C[CH](C(O)=O)N%10           | 2.8_8 |
| C1C1=CC(OCC%11=O)=CC2=CC=CC=C21.OC(C=C1)=CC=C1C[CH](C%10=O)N%11.O=C(O)[CH](CC1=C(F)C(F)=C(F)C(F)=C1F)N%10 | 2.8_9 |
| C1C1=CC(OCC%10=O)=CC2=CC=CC=C21.O=C(O)CN%10                                                               | 2.9_1 |
| C1C1=CC(OCC%10=O)=CC2=CC=CC=C21.CC(C)[CH](C(O)=O)N%10                                                     | 2.9_2 |
| C1C1=CC(OCC%10=O)=CC2=CC=CC=C21.CC(C)C[CH](C(O)=O)N%10                                                    | 2.9_3 |
| C1C1=CC(OCC%10=O)=CC2=CC=CC=C21.C[CH](C(O)=O)N%10                                                         | 2.9_4 |
| C1C1=CC(OCC%10=O)=CC2=CC=CC=C21.O=C(O)[CH](CC1=CC=CC=C1)N%10                                              | 2.9_5 |
| C1C1=CC(OCC%10=O)=CC2=CC=CC=C21.CC[CH](C)[CH](C(O)=O)N%10                                                 | 2.9_6 |
| C1C1=CC(OCC%10=O)=CC2=CC=CC=C21.CSCC[CH](C(O)=O)N%10                                                      | 2.9_7 |
| C1C1=CC(OCC%10=O)=CC2=CC=CC=C21.OC(C=C1)=CC=C1C[CH](C(O)=O)N%10                                           | 2.9_8 |
| C1C1=CC(OCC%10=O)=CC2=CC=CC=C21.O=C(O)[CH](CC1=C(F)C(F)=C(F)C(F)=C1F)N%10                                 | 2.9_9 |
| C%11(COC1=CC=CC2=CC=CC=C21)=O.O=C%10CN%11.O=C(O)CN%10                                                     | 3.1_1 |
| C%11(COC1=CC=CC2=CC=CC=C21)=O.O=C%10CN%11.CC(C)[CH](C(O)=O)N%10                                           | 3.1_2 |
| C%11(COC1=CC=CC2=CC=CC=C21)=O.O=C%10CN%11.CC(C)C[CH](C(O)=O)N%10                                          | 3.1_3 |
| C%11(COC1=CC=CC2=CC=CC=C21)=O.O=C%10CN%11.C[CH](C(O)=O)N%10                                               | 3.1_4 |
| C%11(COC1=CC=CC2=CC=CC=C21)=O.O=C%10CN%11.O=C(O)[CH](CC1=CC=CC=C1)N%10                                    | 3.1_5 |
| C%11(COC1=CC=CC2=CC=CC=C21)=O.O=C%10CN%11.CC[CH](C)[CH](C(O)=O)N%10                                       | 3.1_6 |
| C%11(COC1=CC=CC2=CC=CC=C21)=O.O=C%10CN%11.CSCC[CH](C(O)=O)N%10                                            | 3.1_7 |
| C%11(COC1=CC=CC2=CC=CC=C21)=O.O=C%10CN%11.OC(C=C1)=CC=C1C[CH](C(O)=O)N%10                                 | 3.1_8 |
| C%11(COC1=CC=CC2=CC=CC=C21)=O.O=C%10CN%11.O=C(O)[CH](CC1=C(F)C(F)=C(F)C(F)=C1F)N%10                       | 3.1_9 |
| C%11(COC1=CC=CC2=CC=CC=C21)=O.CC(C)[CH](C%10=O)N%11.O=C(O)CN%10                                           | 3.2_1 |
| C%11(COC1=CC=CC2=CC=CC=C21)=O.CC(C)[CH](C%10=O)N%11.CC(C)[CH](C(O)=O)N%10                                 | 3.2_2 |

|                                                                                                |       |
|------------------------------------------------------------------------------------------------|-------|
| C%11(COC1=CC=CC2=CC=CC=C21)=O.CC(C)[CH](C%10=O)N%11.CC(C)C[CH](C(O)=O)N%10                     | 3.2_3 |
| C%11(COC1=CC=CC2=CC=CC=C21)=O.CC(C)[CH](C%10=O)N%11.C[CH](C(O)=O)N%10                          | 3.2_4 |
| C%11(COC1=CC=CC2=CC=CC=C21)=O.CC(C)[CH](C%10=O)N%11.O=C(O)[CH](CC1=CC=CC=C1)N%10               | 3.2_5 |
| C%11(COC1=CC=CC2=CC=CC=C21)=O.CC(C)[CH](C%10=O)N%11.CC[CH](C)[CH](C(O)=O)N%10                  | 3.2_6 |
| C%11(COC1=CC=CC2=CC=CC=C21)=O.CC(C)[CH](C%10=O)N%11.CSCC[CH](C(O)=O)N%10                       | 3.2_7 |
| C%11(COC1=CC=CC2=CC=CC=C21)=O.CC(C)[CH](C%10=O)N%11.OC(C=C1)=CC=C1C[CH](C(O)=O)N%10            | 3.2_8 |
| C%11(COC1=CC=CC2=CC=CC=C21)=O.CC(C)[CH](C%10=O)N%11.O=C(O)[CH](CC1=C(F)C(F)=C(F)C(F)=C1F)N%10  | 3.2_9 |
| C%11(COC1=CC=CC2=CC=CC=C21)=O.CC(C)C[CH](C%10=O)N%11.O=C(O)CN%10                               | 3.3_1 |
| C%11(COC1=CC=CC2=CC=CC=C21)=O.CC(C)C[CH](C%10=O)N%11.CC(C)[CH](C(O)=O)N%10                     | 3.3_2 |
| C%11(COC1=CC=CC2=CC=CC=C21)=O.CC(C)C[CH](C%10=O)N%11.CC(C)C[CH](C(O)=O)N%10                    | 3.3_3 |
| C%11(COC1=CC=CC2=CC=CC=C21)=O.CC(C)C[CH](C%10=O)N%11.C[CH](C(O)=O)N%10                         | 3.3_4 |
| C%11(COC1=CC=CC2=CC=CC=C21)=O.CC(C)C[CH](C%10=O)N%11.O=C(O)[CH](CC1=CC=CC=C1)N%10              | 3.3_5 |
| C%11(COC1=CC=CC2=CC=CC=C21)=O.CC(C)C[CH](C%10=O)N%11.CC[CH](C)[CH](C(O)=O)N%10                 | 3.3_6 |
| C%11(COC1=CC=CC2=CC=CC=C21)=O.CC(C)C[CH](C%10=O)N%11.CSCC[CH](C(O)=O)N%10                      | 3.3_7 |
| C%11(COC1=CC=CC2=CC=CC=C21)=O.CC(C)C[CH](C%10=O)N%11.OC(C=C1)=CC=C1C[CH](C(O)=O)N%10           | 3.3_8 |
| C%11(COC1=CC=CC2=CC=CC=C21)=O.CC(C)C[CH](C%10=O)N%11.O=C(O)[CH](CC1=C(F)C(F)=C(F)C(F)=C1F)N%10 | 3.3_9 |
| C%11(COC1=CC=CC2=CC=CC=C21)=O.C[CH](C%10=O)N%11.O=C(O)CN%10                                    | 3.4_1 |
| C%11(COC1=CC=CC2=CC=CC=C21)=O.C[CH](C%10=O)N%11.CC(C)[CH](C(O)=O)N%10                          | 3.4_2 |
| C%11(COC1=CC=CC2=CC=CC=C21)=O.C[CH](C%10=O)N%11.CC(C)C[CH](C(O)=O)N%10                         | 3.4_3 |
| C%11(COC1=CC=CC2=CC=CC=C21)=O.C[CH](C%10=O)N%11.C[CH](C(O)=O)N%10                              | 3.4_4 |
| C%11(COC1=CC=CC2=CC=CC=C21)=O.C[CH](C%10=O)N%11.O=C(O)[CH](CC1=CC=CC=C1)N%10                   | 3.4_5 |
| C%11(COC1=CC=CC2=CC=CC=C21)=O.C[CH](C%10=O)N%11.CC[CH](C)[CH](C(O)=O)N%10                      | 3.4_6 |
| C%11(COC1=CC=CC2=CC=CC=C21)=O.C[CH](C%10=O)N%11.CSCC[CH](C(O)=O)N%10                           | 3.4_7 |
| C%11(COC1=CC=CC2=CC=CC=C21)=O.C[CH](C%10=O)N%11.OC(C=C1)=CC=C1C[CH](C(O)=O)N%10                | 3.4_8 |
| C%11(COC1=CC=CC2=CC=CC=C21)=O.C[CH](C%10=O)N%11.O=C(O)[CH](CC1=C(F)C(F)=C(F)C(F)=C1F)N%10      | 3.4_9 |
| C%11(COC1=CC=CC2=CC=CC=C21)=O.O=C%10[CH](CC1=CC=CC=C1)N%11.O=C(O)CN%10                         | 3.5_1 |
| C%11(COC1=CC=CC2=CC=CC=C21)=O.O=C%10[CH](CC1=CC=CC=C1)N%11.CC(C)[CH](C(O)=O)N%10               | 3.5_2 |
| C%11(COC1=CC=CC2=CC=CC=C21)=O.O=C%10[CH](CC1=CC=CC=C1)N%11.CC(C)C[CH](C(O)=O)N%10              | 3.5_3 |
| C%11(COC1=CC=CC2=CC=CC=C21)=O.O=C%10[CH](CC1=CC=CC=C1)N%11.C[CH](C(O)=O)N%10                   | 3.5_4 |
| C%11(COC1=CC=CC2=CC=CC=C21)=O.O=C%10[CH](CC1=CC=CC=C1)N%11.O=C(O)[CH](CC                       | 3.5_5 |

|                                                                                                      |       |
|------------------------------------------------------------------------------------------------------|-------|
| 1=CC=CC=C1)N%10                                                                                      |       |
| C%11(COC1=CC=CC2=CC=CC=C21)=O.O=C%10[CH](CC1=CC=CC=C1)N%11.CC[CH](C)[CH](C(O)=O)N%10                 | 3.5_6 |
| C%11(COC1=CC=CC2=CC=CC=C21)=O.O=C%10[CH](CC1=CC=CC=C1)N%11.CSCC[CH](C(O)=O)N%10                      | 3.5_7 |
| C%11(COC1=CC=CC2=CC=CC=C21)=O.O=C%10[CH](CC1=CC=CC=C1)N%11.OC(C=C1)=CC=C1C[CH](C(O)=O)N%10           | 3.5_8 |
| C%11(COC1=CC=CC2=CC=CC=C21)=O.O=C%10[CH](CC1=CC=CC=C1)N%11.O=C(O)[CH](CC1=C(F)C(F)=C(F)C(F)=C1F)N%10 | 3.5_9 |
| C%11(COC1=CC=CC2=CC=CC=C21)=O.CC[CH](C)[CH](C%10=O)N%11.O=C(O)CN%10                                  | 3.6_1 |
| C%11(COC1=CC=CC2=CC=CC=C21)=O.CC[CH](C)[CH](C%10=O)N%11.CC(C)[CH](C(O)=O)N%10                        | 3.6_2 |
| C%11(COC1=CC=CC2=CC=CC=C21)=O.CC[CH](C)[CH](C%10=O)N%11.CC(C)C[CH](C(O)=O)N%10                       | 3.6_3 |
| C%11(COC1=CC=CC2=CC=CC=C21)=O.CC[CH](C)[CH](C%10=O)N%11.C[CH](C(O)=O)N%10                            | 3.6_4 |
| C%11(COC1=CC=CC2=CC=CC=C21)=O.CC[CH](C)[CH](C%10=O)N%11.O=C(O)[CH](CC1=CC=CC=C1)N%10                 | 3.6_5 |
| C%11(COC1=CC=CC2=CC=CC=C21)=O.CC[CH](C)[CH](C%10=O)N%11.CC[CH](C)[CH](C(O)=O)N%10                    | 3.6_6 |
| C%11(COC1=CC=CC2=CC=CC=C21)=O.CC[CH](C)[CH](C%10=O)N%11.CSCC[CH](C(O)=O)N%10                         | 3.6_7 |
| C%11(COC1=CC=CC2=CC=CC=C21)=O.CC[CH](C)[CH](C%10=O)N%11.OC(C=C1)=CC=C1C[CH](C(O)=O)N%10              | 3.6_8 |
| C%11(COC1=CC=CC2=CC=CC=C21)=O.CC[CH](C)[CH](C%10=O)N%11.O=C(O)[CH](CC1=C(F)C(F)=C(F)C(F)=C1F)N%10    | 3.6_9 |
| C%11(COC1=CC=CC2=CC=CC=C21)=O.CSCC[CH](C%10=O)N%11.O=C(O)CN%10                                       | 3.7_1 |
| C%11(COC1=CC=CC2=CC=CC=C21)=O.CSCC[CH](C%10=O)N%11.CC(C)[CH](C(O)=O)N%10                             | 3.7_2 |
| C%11(COC1=CC=CC2=CC=CC=C21)=O.CSCC[CH](C%10=O)N%11.CC(C)C[CH](C(O)=O)N%10                            | 3.7_3 |
| C%11(COC1=CC=CC2=CC=CC=C21)=O.CSCC[CH](C%10=O)N%11.C[CH](C(O)=O)N%10                                 | 3.7_4 |
| C%11(COC1=CC=CC2=CC=CC=C21)=O.CSCC[CH](C%10=O)N%11.O=C(O)[CH](CC1=CC=CC=C1)N%10                      | 3.7_5 |
| C%11(COC1=CC=CC2=CC=CC=C21)=O.CSCC[CH](C%10=O)N%11.CC[CH](C)[CH](C(O)=O)N%10                         | 3.7_6 |
| C%11(COC1=CC=CC2=CC=CC=C21)=O.CSCC[CH](C%10=O)N%11.CSCC[CH](C(O)=O)N%10                              | 3.7_7 |
| C%11(COC1=CC=CC2=CC=CC=C21)=O.CSCC[CH](C%10=O)N%11.OC(C=C1)=CC=C1C[CH](C(O)=O)N%10                   | 3.7_8 |
| C%11(COC1=CC=CC2=CC=CC=C21)=O.CSCC[CH](C%10=O)N%11.O=C(O)[CH](CC1=C(F)C(F)=C(F)C(F)=C1F)N%10         | 3.7_9 |
| C%11(COC1=CC=CC2=CC=CC=C21)=O.OC(C=C1)=CC=C1C[CH](C%10=O)N%11.O=C(O)CN%10                            | 3.8_1 |
| C%11(COC1=CC=CC2=CC=CC=C21)=O.OC(C=C1)=CC=C1C[CH](C%10=O)N%11.CC(C)[CH](C(O)=O)N%10                  | 3.8_2 |
| C%11(COC1=CC=CC2=CC=CC=C21)=O.OC(C=C1)=CC=C1C[CH](C%10=O)N%11.CC(C)C[CH](C(O)=O)N%10                 | 3.8_3 |
| C%11(COC1=CC=CC2=CC=CC=C21)=O.OC(C=C1)=CC=C1C[CH](C%10=O)N%11.C[CH](C(O)=O)N%10                      | 3.8_4 |
| C%11(COC1=CC=CC2=CC=CC=C21)=O.OC(C=C1)=CC=C1C[CH](C%10=O)N%11.O=C(O)[CH]                             | 3.8_5 |

|                                                                                                          |       |
|----------------------------------------------------------------------------------------------------------|-------|
| (CC1=CC=CC=C1)N%10                                                                                       |       |
| C%11(COC1=CC=CC2=CC=CC=C21)=O.O.C(C=C1)=CC=C1C[CH](C%10=O)N%11.CC[CH](C)[CH](C(O)=O)N%10                 | 3.8_6 |
| C%11(COC1=CC=CC2=CC=CC=C21)=O.O.C(C=C1)=CC=C1C[CH](C%10=O)N%11.CSCC[CH](C(O)=O)N%10                      | 3.8_7 |
| C%11(COC1=CC=CC2=CC=CC=C21)=O.O.C(C=C1)=CC=C1C[CH](C%10=O)N%11.O.C(C=C1)=CC=C1C[CH](C(O)=O)N%10          | 3.8_8 |
| C%11(COC1=CC=CC2=CC=CC=C21)=O.O.C(C=C1)=CC=C1C[CH](C%10=O)N%11.O=C(O)[CH](CC1=C(F)C(F)=C(F)C(F)=C1F)N%10 | 3.8_9 |
| C%10(COC1=CC=CC2=CC=CC=C21)=O.O=C(O)CN%10                                                                | 3.9_1 |
| C%10(COC1=CC=CC2=CC=CC=C21)=O.CC(C)[CH](C(O)=O)N%10                                                      | 3.9_2 |
| C%10(COC1=CC=CC2=CC=CC=C21)=O.CC(C)C[CH](C(O)=O)N%10                                                     | 3.9_3 |
| C%10(COC1=CC=CC2=CC=CC=C21)=O.C[CH](C(O)=O)N%10                                                          | 3.9_4 |
| C%10(COC1=CC=CC2=CC=CC=C21)=O.O=C(O)[CH](CC1=CC=CC=C1)N%10                                               | 3.9_5 |
| C%10(COC1=CC=CC2=CC=CC=C21)=O.CC[CH](C)[CH](C(O)=O)N%10                                                  | 3.9_6 |
| C%10(COC1=CC=CC2=CC=CC=C21)=O.CSCC[CH](C(O)=O)N%10                                                       | 3.9_7 |
| C%10(COC1=CC=CC2=CC=CC=C21)=O.O.C(C=C1)=CC=C1C[CH](C(O)=O)N%10                                           | 3.9_8 |
| C%10(COC1=CC=CC2=CC=CC=C21)=O.O=C(O)[CH](CC1=C(F)C(F)=C(F)C(F)=C1F)N%10                                  | 3.9_9 |
| C%11(COC1=CC2=CC=CC=C2C=C1)=O.O=C%10CN%11.O=C(O)CN%10                                                    | 4.1_1 |
| C%11(COC1=CC2=CC=CC=C2C=C1)=O.O=C%10CN%11.CC(C)[CH](C(O)=O)N%10                                          | 4.1_2 |
| C%11(COC1=CC2=CC=CC=C2C=C1)=O.O=C%10CN%11.CC(C)C[CH](C(O)=O)N%10                                         | 4.1_3 |
| C%11(COC1=CC2=CC=CC=C2C=C1)=O.O=C%10CN%11.C[CH](C(O)=O)N%10                                              | 4.1_4 |
| C%11(COC1=CC2=CC=CC=C2C=C1)=O.O=C%10CN%11.O=C(O)[CH](CC1=CC=CC=C1)N%10                                   | 4.1_5 |
| C%11(COC1=CC2=CC=CC=C2C=C1)=O.O=C%10CN%11.CC[CH](C)[CH](C(O)=O)N%10                                      | 4.1_6 |
| C%11(COC1=CC2=CC=CC=C2C=C1)=O.O=C%10CN%11.CSCC[CH](C(O)=O)N%10                                           | 4.1_7 |
| C%11(COC1=CC2=CC=CC=C2C=C1)=O.O=C%10CN%11.O.C(C=C1)=CC=C1C[CH](C(O)=O)N%10                               | 4.1_8 |
| C%11(COC1=CC2=CC=CC=C2C=C1)=O.O=C%10CN%11.O=C(O)[CH](CC1=C(F)C(F)=C(F)C(F)=C1F)N%10                      | 4.1_9 |
| C%11(COC1=CC2=CC=CC=C2C=C1)=O.CC(C)[CH](C%10=O)N%11.O=C(O)CN%10                                          | 4.2_1 |
| C%11(COC1=CC2=CC=CC=C2C=C1)=O.CC(C)[CH](C%10=O)N%11.CC(C)[CH](C(O)=O)N%10                                | 4.2_2 |
| C%11(COC1=CC2=CC=CC=C2C=C1)=O.CC(C)[CH](C%10=O)N%11.CC(C)C[CH](C(O)=O)N%10                               | 4.2_3 |
| C%11(COC1=CC2=CC=CC=C2C=C1)=O.CC(C)[CH](C%10=O)N%11.C[CH](C(O)=O)N%10                                    | 4.2_4 |
| C%11(COC1=CC2=CC=CC=C2C=C1)=O.CC(C)[CH](C%10=O)N%11.O=C(O)[CH](CC1=CC=CC=C1)N%10                         | 4.2_5 |
| C%11(COC1=CC2=CC=CC=C2C=C1)=O.CC(C)[CH](C%10=O)N%11.CC[CH](C)[CH](C(O)=O)N%10                            | 4.2_6 |
| C%11(COC1=CC2=CC=CC=C2C=C1)=O.CC(C)[CH](C%10=O)N%11.CSCC[CH](C(O)=O)N%10                                 | 4.2_7 |
| C%11(COC1=CC2=CC=CC=C2C=C1)=O.CC(C)[CH](C%10=O)N%11.O.C(C=C1)=CC=C1C[CH](C(O)=O)N%10                     | 4.2_8 |
| C%11(COC1=CC2=CC=CC=C2C=C1)=O.CC(C)[CH](C%10=O)N%11.O=C(O)[CH](CC1=C(F)C(F)=C(F)C(F)=C1F)N%10            | 4.2_9 |
| C%11(COC1=CC2=CC=CC=C2C=C1)=O.CC(C)C[CH](C%10=O)N%11.O=C(O)CN%10                                         | 4.3_1 |
| C%11(COC1=CC2=CC=CC=C2C=C1)=O.CC(C)C[CH](C%10=O)N%11.CC(C)[CH](C(O)=O)N%10                               | 4.3_2 |



|                                                                                                      |       |
|------------------------------------------------------------------------------------------------------|-------|
| C%11(COC1=CC2=CC=CC=C2C=C1)=O.CC(C)C[CH](C%10=O)N%11.CC(C)C[CH](C(O)=O)N%10                          | 4.3_3 |
| C%11(COC1=CC2=CC=CC=C2C=C1)=O.CC(C)C[CH](C%10=O)N%11.C[CH](C(O)=O)N%10                               | 4.3_4 |
| C%11(COC1=CC2=CC=CC=C2C=C1)=O.CC(C)C[CH](C%10=O)N%11.O=C(O)[CH](CC1=CC=C(C=C1)N%10                   | 4.3_5 |
| C%11(COC1=CC2=CC=CC=C2C=C1)=O.CC(C)C[CH](C%10=O)N%11.CC[CH](C)[CH](C(O)=O)N%10                       | 4.3_6 |
| C%11(COC1=CC2=CC=CC=C2C=C1)=O.CC(C)C[CH](C%10=O)N%11.CSCC[CH](C(O)=O)N%10                            | 4.3_7 |
| C%11(COC1=CC2=CC=CC=C2C=C1)=O.CC(C)C[CH](C%10=O)N%11.OC(C=C1)=CC=C1C[CH](C(O)=O)N%10                 | 4.3_8 |
| C%11(COC1=CC2=CC=CC=C2C=C1)=O.CC(C)C[CH](C%10=O)N%11.O=C(O)[CH](CC1=C(F)C(F)=C(F)C(F)=C1F)N%10       | 4.3_9 |
| C%11(COC1=CC2=CC=CC=C2C=C1)=O.C[CH](C%10=O)N%11.O=C(O)CN%10                                          | 4.4_1 |
| C%11(COC1=CC2=CC=CC=C2C=C1)=O.C[CH](C%10=O)N%11.CC(C)[CH](C(O)=O)N%10                                | 4.4_2 |
| C%11(COC1=CC2=CC=CC=C2C=C1)=O.C[CH](C%10=O)N%11.CC(C)C[CH](C(O)=O)N%10                               | 4.4_3 |
| C%11(COC1=CC2=CC=CC=C2C=C1)=O.C[CH](C%10=O)N%11.C[CH](C(O)=O)N%10                                    | 4.4_4 |
| C%11(COC1=CC2=CC=CC=C2C=C1)=O.C[CH](C%10=O)N%11.O=C(O)[CH](CC1=CC=CC=C1)N%10                         | 4.4_5 |
| C%11(COC1=CC2=CC=CC=C2C=C1)=O.C[CH](C%10=O)N%11.CC[CH](C)[CH](C(O)=O)N%10                            | 4.4_6 |
| C%11(COC1=CC2=CC=CC=C2C=C1)=O.C[CH](C%10=O)N%11.CSCC[CH](C(O)=O)N%10                                 | 4.4_7 |
| C%11(COC1=CC2=CC=CC=C2C=C1)=O.C[CH](C%10=O)N%11.OC(C=C1)=CC=C1C[CH](C(O)=O)N%10                      | 4.4_8 |
| C%11(COC1=CC2=CC=CC=C2C=C1)=O.C[CH](C%10=O)N%11.O=C(O)[CH](CC1=C(F)C(F)=C(F)C(F)=C1F)N%10            | 4.4_9 |
| C%11(COC1=CC2=CC=CC=C2C=C1)=O.O=C%10[CH](CC1=CC=CC=C1)N%11.O=C(O)CN%10                               | 4.5_1 |
| C%11(COC1=CC2=CC=CC=C2C=C1)=O.O=C%10[CH](CC1=CC=CC=C1)N%11.CC(C)[CH](C(O)=O)N%10                     | 4.5_2 |
| C%11(COC1=CC2=CC=CC=C2C=C1)=O.O=C%10[CH](CC1=CC=CC=C1)N%11.CC(C)C[CH](C(O)=O)N%10                    | 4.5_3 |
| C%11(COC1=CC2=CC=CC=C2C=C1)=O.O=C%10[CH](CC1=CC=CC=C1)N%11.C[CH](C(O)=O)N%10                         | 4.5_4 |
| C%11(COC1=CC2=CC=CC=C2C=C1)=O.O=C%10[CH](CC1=CC=CC=C1)N%11.O=C(O)[CH](CC1=CC=CC=C1)N%10              | 4.5_5 |
| C%11(COC1=CC2=CC=CC=C2C=C1)=O.O=C%10[CH](CC1=CC=CC=C1)N%11.CC[CH](C)[CH](C(O)=O)N%10                 | 4.5_6 |
| C%11(COC1=CC2=CC=CC=C2C=C1)=O.O=C%10[CH](CC1=CC=CC=C1)N%11.CSCC[CH](C(O)=O)N%10                      | 4.5_7 |
| C%11(COC1=CC2=CC=CC=C2C=C1)=O.O=C%10[CH](CC1=CC=CC=C1)N%11.OC(C=C1)=CC=C1C[CH](C(O)=O)N%10           | 4.5_8 |
| C%11(COC1=CC2=CC=CC=C2C=C1)=O.O=C%10[CH](CC1=CC=CC=C1)N%11.O=C(O)[CH](CC1=C(F)C(F)=C(F)C(F)=C1F)N%10 | 4.5_9 |
| C%11(COC1=CC2=CC=CC=C2C=C1)=O.CC[CH](C)[CH](C%10=O)N%11.O=C(O)CN%10                                  | 4.6_1 |
| C%11(COC1=CC2=CC=CC=C2C=C1)=O.CC[CH](C)[CH](C%10=O)N%11.CC(C)[CH](C(O)=O)N%10                        | 4.6_2 |
| C%11(COC1=CC2=CC=CC=C2C=C1)=O.CC[CH](C)[CH](C%10=O)N%11.CC(C)C[CH](C(O)=O)N%10                       | 4.6_3 |
| C%11(COC1=CC2=CC=CC=C2C=C1)=O.CC[CH](C)[CH](C%10=O)N%11.C[CH](C(O)=O)N%10                            | 4.6_4 |

|                                                                                                         |       |
|---------------------------------------------------------------------------------------------------------|-------|
| C%11(COC1=CC2=CC=CC=C2C=C1)=O.CC[CH](C)[CH](C%10=O)N%11.O=C(O)[CH](CC1=CC=CC=C1)N%10                    | 4.6_5 |
| C%11(COC1=CC2=CC=CC=C2C=C1)=O.CC[CH](C)[CH](C%10=O)N%11.CC[CH](C)[CH](C(O)=O)N%10                       | 4.6_6 |
| C%11(COC1=CC2=CC=CC=C2C=C1)=O.CC[CH](C)[CH](C%10=O)N%11.CSCC[CH](C(O)=O)N%10                            | 4.6_7 |
| C%11(COC1=CC2=CC=CC=C2C=C1)=O.CC[CH](C)[CH](C%10=O)N%11.OC(C=C1)=CC=C1C[CH](C(O)=O)N%10                 | 4.6_8 |
| C%11(COC1=CC2=CC=CC=C2C=C1)=O.CC[CH](C)[CH](C%10=O)N%11.O=C(O)[CH](CC1=C(F)C(F)=C(F)C(F)=C1F)N%10       | 4.6_9 |
| C%11(COC1=CC2=CC=CC=C2C=C1)=O.CSCC[CH](C%10=O)N%11.O=C(O)CN%10                                          | 4.7_1 |
| C%11(COC1=CC2=CC=CC=C2C=C1)=O.CSCC[CH](C%10=O)N%11.CC(C)[CH](C(O)=O)N%10                                | 4.7_2 |
| C%11(COC1=CC2=CC=CC=C2C=C1)=O.CSCC[CH](C%10=O)N%11.CC(C)C[CH](C(O)=O)N%10                               | 4.7_3 |
| C%11(COC1=CC2=CC=CC=C2C=C1)=O.CSCC[CH](C%10=O)N%11.C[CH](C(O)=O)N%10                                    | 4.7_4 |
| C%11(COC1=CC2=CC=CC=C2C=C1)=O.CSCC[CH](C%10=O)N%11.O=C(O)[CH](CC1=CC=CC=C1)N%10                         | 4.7_5 |
| C%11(COC1=CC2=CC=CC=C2C=C1)=O.CSCC[CH](C%10=O)N%11.CC[CH](C)[CH](C(O)=O)N%10                            | 4.7_6 |
| C%11(COC1=CC2=CC=CC=C2C=C1)=O.CSCC[CH](C%10=O)N%11.CSCC[CH](C(O)=O)N%10                                 | 4.7_7 |
| C%11(COC1=CC2=CC=CC=C2C=C1)=O.CSCC[CH](C%10=O)N%11.OC(C=C1)=CC=C1C[CH](C(O)=O)N%10                      | 4.7_8 |
| C%11(COC1=CC2=CC=CC=C2C=C1)=O.CSCC[CH](C%10=O)N%11.O=C(O)[CH](CC1=C(F)C(F)=C(F)C(F)=C1F)N%10            | 4.7_9 |
| C%11(COC1=CC2=CC=CC=C2C=C1)=O.OC(C=C1)=CC=C1C[CH](C%10=O)N%11.O=C(O)CN%10                               | 4.8_1 |
| C%11(COC1=CC2=CC=CC=C2C=C1)=O.OC(C=C1)=CC=C1C[CH](C%10=O)N%11.CC(C)[CH](C(O)=O)N%10                     | 4.8_2 |
| C%11(COC1=CC2=CC=CC=C2C=C1)=O.OC(C=C1)=CC=C1C[CH](C%10=O)N%11.CC(C)C[CH](C(O)=O)N%10                    | 4.8_3 |
| C%11(COC1=CC2=CC=CC=C2C=C1)=O.OC(C=C1)=CC=C1C[CH](C%10=O)N%11.C[CH](C(O)=O)N%10                         | 4.8_4 |
| C%11(COC1=CC2=CC=CC=C2C=C1)=O.OC(C=C1)=CC=C1C[CH](C%10=O)N%11.O=C(O)[CH](CC1=CC=CC=C1)N%10              | 4.8_5 |
| C%11(COC1=CC2=CC=CC=C2C=C1)=O.OC(C=C1)=CC=C1C[CH](C%10=O)N%11.CC[CH](C)[CH](C(O)=O)N%10                 | 4.8_6 |
| C%11(COC1=CC2=CC=CC=C2C=C1)=O.OC(C=C1)=CC=C1C[CH](C%10=O)N%11.CSCC[CH](C(O)=O)N%10                      | 4.8_7 |
| C%11(COC1=CC2=CC=CC=C2C=C1)=O.OC(C=C1)=CC=C1C[CH](C%10=O)N%11.OC(C=C1)=CC=C1C[CH](C(O)=O)N%10           | 4.8_8 |
| C%11(COC1=CC2=CC=CC=C2C=C1)=O.OC(C=C1)=CC=C1C[CH](C%10=O)N%11.O=C(O)[CH](CC1=C(F)C(F)=C(F)C(F)=C1F)N%10 | 4.8_9 |
| C%10(COC1=CC2=CC=CC=C2C=C1)=O.O=C(O)CN%10                                                               | 4.9_1 |
| C%10(COC1=CC2=CC=CC=C2C=C1)=O.CC(C)[CH](C(O)=O)N%10                                                     | 4.9_2 |
| C%10(COC1=CC2=CC=CC=C2C=C1)=O.CC(C)C[CH](C(O)=O)N%10                                                    | 4.9_3 |
| C%10(COC1=CC2=CC=CC=C2C=C1)=O.C[CH](C(O)=O)N%10                                                         | 4.9_4 |
| C%10(COC1=CC2=CC=CC=C2C=C1)=O.O=C(O)[CH](CC1=CC=CC=C1)N%10                                              | 4.9_5 |
| C%10(COC1=CC2=CC=CC=C2C=C1)=O.CC[CH](C)[CH](C(O)=O)N%10                                                 | 4.9_6 |

|                                                                                                    |       |
|----------------------------------------------------------------------------------------------------|-------|
| C%10(COC1=CC2=CC=CC=C2C=C1)=O.CSCC[CH](C(O)=O)N%10                                                 | 4.9_7 |
| C%10(COC1=CC2=CC=CC=C2C=C1)=O.OC(C=C1)=CC=C1C[CH](C(O)=O)N%10                                      | 4.9_8 |
| C%10(COC1=CC2=CC=CC=C2C=C1)=O.O=C(O)[CH](CC1=C(F)C(F)=C(F)C(F)=C1F)N%10                            | 4.9_9 |
| O=C%11CN1C2=C(C=CC=C2)C3=CC=CC=C31.O=C%10CN%11.O=C(O)CN%10                                         | 5.1_1 |
| O=C%11CN1C2=C(C=CC=C2)C3=CC=CC=C31.O=C%10CN%11.CC(C)[CH](C(O)=O)N%10                               | 5.1_2 |
| O=C%11CN1C2=C(C=CC=C2)C3=CC=CC=C31.O=C%10CN%11.CC(C)C[CH](C(O)=O)N%10                              | 5.1_3 |
| O=C%11CN1C2=C(C=CC=C2)C3=CC=CC=C31.O=C%10CN%11.C[CH](C(O)=O)N%10                                   | 5.1_4 |
| O=C%11CN1C2=C(C=CC=C2)C3=CC=CC=C31.O=C%10CN%11.O=C(O)[CH](CC1=CC=CC=C1)N%10                        | 5.1_5 |
| O=C%11CN1C2=C(C=CC=C2)C3=CC=CC=C31.O=C%10CN%11.CC[CH](C)[CH](C(O)=O)N%10                           | 5.1_6 |
| O=C%11CN1C2=C(C=CC=C2)C3=CC=CC=C31.O=C%10CN%11.CSCC[CH](C(O)=O)N%10                                | 5.1_7 |
| O=C%11CN1C2=C(C=CC=C2)C3=CC=CC=C31.O=C%10CN%11.OC(C=C1)=CC=C1C[CH](C(O)=O)N%10                     | 5.1_8 |
| O=C%11CN1C2=C(C=CC=C2)C3=CC=CC=C31.O=C%10CN%11.O=C(O)[CH](CC1=C(F)C(F)=C(F)C(F)=C1F)N%10           | 5.1_9 |
| O=C%11CN1C2=C(C=CC=C2)C3=CC=CC=C31.CC(C)[CH](C%10=O)N%11.O=C(O)CN%10                               | 5.2_1 |
| O=C%11CN1C2=C(C=CC=C2)C3=CC=CC=C31.CC(C)[CH](C%10=O)N%11.CC(C)[CH](C(O)=O)N%10                     | 5.2_2 |
| O=C%11CN1C2=C(C=CC=C2)C3=CC=CC=C31.CC(C)[CH](C%10=O)N%11.CC(C)C[CH](C(O)=O)N%10                    | 5.2_3 |
| O=C%11CN1C2=C(C=CC=C2)C3=CC=CC=C31.CC(C)[CH](C%10=O)N%11.C[CH](C(O)=O)N%10                         | 5.2_4 |
| O=C%11CN1C2=C(C=CC=C2)C3=CC=CC=C31.CC(C)[CH](C%10=O)N%11.O=C(O)[CH](CC1=CC=CC=C1)N%10              | 5.2_5 |
| O=C%11CN1C2=C(C=CC=C2)C3=CC=CC=C31.CC(C)[CH](C%10=O)N%11.CC[CH](C)[CH](C(O)=O)N%10                 | 5.2_6 |
| O=C%11CN1C2=C(C=CC=C2)C3=CC=CC=C31.CC(C)[CH](C%10=O)N%11.CSCC[CH](C(O)=O)N%10                      | 5.2_7 |
| O=C%11CN1C2=C(C=CC=C2)C3=CC=CC=C31.CC(C)[CH](C%10=O)N%11.OC(C=C1)=CC=C1C[CH](C(O)=O)N%10           | 5.2_8 |
| O=C%11CN1C2=C(C=CC=C2)C3=CC=CC=C31.CC(C)[CH](C%10=O)N%11.O=C(O)[CH](CC1=C(F)C(F)=C(F)C(F)=C1F)N%10 | 5.2_9 |
| O=C%11CN1C2=C(C=CC=C2)C3=CC=CC=C31.CC(C)C[CH](C%10=O)N%11.O=C(O)CN%10                              | 5.3_1 |
| O=C%11CN1C2=C(C=CC=C2)C3=CC=CC=C31.CC(C)C[CH](C%10=O)N%11.CC(C)[CH](C(O)=O)N%10                    | 5.3_2 |
| O=C%11CN1C2=C(C=CC=C2)C3=CC=CC=C31.CC(C)C[CH](C%10=O)N%11.CC(C)C[CH](C(O)=O)N%10                   | 5.3_3 |
| O=C%11CN1C2=C(C=CC=C2)C3=CC=CC=C31.CC(C)C[CH](C%10=O)N%11.C[CH](C(O)=O)N%10                        | 5.3_4 |
| O=C%11CN1C2=C(C=CC=C2)C3=CC=CC=C31.CC(C)C[CH](C%10=O)N%11.O=C(O)[CH](CC1=CC=CC=C1)N%10             | 5.3_5 |
| O=C%11CN1C2=C(C=CC=C2)C3=CC=CC=C31.CC(C)C[CH](C%10=O)N%11.CC[CH](C)[CH](C(O)=O)N%10                | 5.3_6 |
| O=C%11CN1C2=C(C=CC=C2)C3=CC=CC=C31.CC(C)C[CH](C%10=O)N%11.CSCC[CH](C(O)=O)N%10                     | 5.3_7 |
| O=C%11CN1C2=C(C=CC=C2)C3=CC=CC=C31.CC(C)C[CH](C%10=O)N%11.OC(C=C1)=CC=C1C[CH](C(O)=O)N%10          | 5.3_8 |

|                                                                                                           |       |
|-----------------------------------------------------------------------------------------------------------|-------|
| O=C%11CN1C2=C(C=CC=C2)C3=CC=CC=C31.CC(C)C[CH](C%10=O)N%11.O=C(O)[CH](CC1=C(F)C(F)=C(F)C(F)=C1F)N%10       | 5.3_9 |
| O=C%11CN1C2=C(C=CC=C2)C3=CC=CC=C31.C[CH](C%10=O)N%11.O=C(O)CN%10                                          | 5.4_1 |
| O=C%11CN1C2=C(C=CC=C2)C3=CC=CC=C31.C[CH](C%10=O)N%11.CC(C)[CH](C(O)=O)N%10                                | 5.4_2 |
| O=C%11CN1C2=C(C=CC=C2)C3=CC=CC=C31.C[CH](C%10=O)N%11.CC(C)C[CH](C(O)=O)N%10                               | 5.4_3 |
| O=C%11CN1C2=C(C=CC=C2)C3=CC=CC=C31.C[CH](C%10=O)N%11.C[CH](C(O)=O)N%10                                    | 5.4_4 |
| O=C%11CN1C2=C(C=CC=C2)C3=CC=CC=C31.C[CH](C%10=O)N%11.O=C(O)[CH](CC1=CC=C(C=C1)N%10                        | 5.4_5 |
| O=C%11CN1C2=C(C=CC=C2)C3=CC=CC=C31.C[CH](C%10=O)N%11.CC[CH](C)[CH](C(O)=O)N%10                            | 5.4_6 |
| O=C%11CN1C2=C(C=CC=C2)C3=CC=CC=C31.C[CH](C%10=O)N%11.CSCC[CH](C(O)=O)N%10                                 | 5.4_7 |
| O=C%11CN1C2=C(C=CC=C2)C3=CC=CC=C31.C[CH](C%10=O)N%11.OC(C=C1)=CC=C1C[CH](C(O)=O)N%10                      | 5.4_8 |
| O=C%11CN1C2=C(C=CC=C2)C3=CC=CC=C31.C[CH](C%10=O)N%11.O=C(O)[CH](CC1=C(F)C(F)=C(F)C(F)=C1F)N%10            | 5.4_9 |
| O=C%11CN1C2=C(C=CC=C2)C3=CC=CC=C31.O=C%10[CH](CC1=CC=CC=C1)N%11.O=C(O)CN%10                               | 5.5_1 |
| O=C%11CN1C2=C(C=CC=C2)C3=CC=CC=C31.O=C%10[CH](CC1=CC=CC=C1)N%11.CC(C)[CH](C(O)=O)N%10                     | 5.5_2 |
| O=C%11CN1C2=C(C=CC=C2)C3=CC=CC=C31.O=C%10[CH](CC1=CC=CC=C1)N%11.CC(C)C[CH](C(O)=O)N%10                    | 5.5_3 |
| O=C%11CN1C2=C(C=CC=C2)C3=CC=CC=C31.O=C%10[CH](CC1=CC=CC=C1)N%11.C[CH](C(O)=O)N%10                         | 5.5_4 |
| O=C%11CN1C2=C(C=CC=C2)C3=CC=CC=C31.O=C%10[CH](CC1=CC=CC=C1)N%11.O=C(O)[CH](CC1=CC=CC=C1)N%10              | 5.5_5 |
| O=C%11CN1C2=C(C=CC=C2)C3=CC=CC=C31.O=C%10[CH](CC1=CC=CC=C1)N%11.CC[CH](C)[CH](C(O)=O)N%10                 | 5.5_6 |
| O=C%11CN1C2=C(C=CC=C2)C3=CC=CC=C31.O=C%10[CH](CC1=CC=CC=C1)N%11.CSCC[CH](C(O)=O)N%10                      | 5.5_7 |
| O=C%11CN1C2=C(C=CC=C2)C3=CC=CC=C31.O=C%10[CH](CC1=CC=CC=C1)N%11.OC(C=C1)=CC=C1C[CH](C(O)=O)N%10           | 5.5_8 |
| O=C%11CN1C2=C(C=CC=C2)C3=CC=CC=C31.O=C%10[CH](CC1=CC=CC=C1)N%11.O=C(O)[CH](CC1=C(F)C(F)=C(F)C(F)=C1F)N%10 | 5.5_9 |
| O=C%11CN1C2=C(C=CC=C2)C3=CC=CC=C31.CC[CH](C)[CH](C%10=O)N%11.O=C(O)CN%10                                  | 5.6_1 |
| O=C%11CN1C2=C(C=CC=C2)C3=CC=CC=C31.CC[CH](C)[CH](C%10=O)N%11.CC(C)[CH](C(O)=O)N%10                        | 5.6_2 |
| O=C%11CN1C2=C(C=CC=C2)C3=CC=CC=C31.CC[CH](C)[CH](C%10=O)N%11.CC(C)C[CH](C(O)=O)N%10                       | 5.6_3 |
| O=C%11CN1C2=C(C=CC=C2)C3=CC=CC=C31.CC[CH](C)[CH](C%10=O)N%11.C[CH](C(O)=O)N%10                            | 5.6_4 |
| O=C%11CN1C2=C(C=CC=C2)C3=CC=CC=C31.CC[CH](C)[CH](C%10=O)N%11.O=C(O)[CH](CC1=CC=CC=C1)N%10                 | 5.6_5 |
| O=C%11CN1C2=C(C=CC=C2)C3=CC=CC=C31.CC[CH](C)[CH](C%10=O)N%11.CC[CH](C)[CH](C(O)=O)N%10                    | 5.6_6 |
| O=C%11CN1C2=C(C=CC=C2)C3=CC=CC=C31.CC[CH](C)[CH](C%10=O)N%11.CSCC[CH](C(O)=O)N%10                         | 5.6_7 |

|                                                                                                              |       |
|--------------------------------------------------------------------------------------------------------------|-------|
| )=O)N%10                                                                                                     |       |
| O=C%11CN1C2=C(C=CC=C2)C3=CC=CC=C31.CC[CH](C)[CH](C%10=O)N%11.OC(C=C1)=CC=C1C[CH](C(O)=O)N%10                 | 5.6_8 |
| O=C%11CN1C2=C(C=CC=C2)C3=CC=CC=C31.CC[CH](C)[CH](C%10=O)N%11.O=C(O)[CH](CC1=C(F)C(F)=C(F)C(F)=C1F)N%10       | 5.6_9 |
| O=C%11CN1C2=C(C=CC=C2)C3=CC=CC=C31.CSCC[CH](C%10=O)N%11.O=C(O)CN%10                                          | 5.7_1 |
| O=C%11CN1C2=C(C=CC=C2)C3=CC=CC=C31.CSCC[CH](C%10=O)N%11.CC(C)[CH](C(O)=O)N%10                                | 5.7_2 |
| O=C%11CN1C2=C(C=CC=C2)C3=CC=CC=C31.CSCC[CH](C%10=O)N%11.CC(C)C[CH](C(O)=O)N%10                               | 5.7_3 |
| O=C%11CN1C2=C(C=CC=C2)C3=CC=CC=C31.CSCC[CH](C%10=O)N%11.C[CH](C(O)=O)N%10                                    | 5.7_4 |
| O=C%11CN1C2=C(C=CC=C2)C3=CC=CC=C31.CSCC[CH](C%10=O)N%11.O=C(O)[CH](CC1=CC=CC=C1)N%10                         | 5.7_5 |
| O=C%11CN1C2=C(C=CC=C2)C3=CC=CC=C31.CSCC[CH](C%10=O)N%11.CC[CH](C)[CH](C(O)=O)N%10                            | 5.7_6 |
| O=C%11CN1C2=C(C=CC=C2)C3=CC=CC=C31.CSCC[CH](C%10=O)N%11.CSCC[CH](C(O)=O)N%10                                 | 5.7_7 |
| O=C%11CN1C2=C(C=CC=C2)C3=CC=CC=C31.CSCC[CH](C%10=O)N%11.OC(C=C1)=CC=C1C[CH](C(O)=O)N%10                      | 5.7_8 |
| O=C%11CN1C2=C(C=CC=C2)C3=CC=CC=C31.CSCC[CH](C%10=O)N%11.O=C(O)[CH](CC1=C(F)C(F)=C(F)C(F)=C1F)N%10            | 5.7_9 |
| O=C%11CN1C2=C(C=CC=C2)C3=CC=CC=C31.OC(C=C1)=CC=C1C[CH](C%10=O)N%11.O=C(O)CN%10                               | 5.8_1 |
| O=C%11CN1C2=C(C=CC=C2)C3=CC=CC=C31.OC(C=C1)=CC=C1C[CH](C%10=O)N%11.CC(C)[CH](C(O)=O)N%10                     | 5.8_2 |
| O=C%11CN1C2=C(C=CC=C2)C3=CC=CC=C31.OC(C=C1)=CC=C1C[CH](C%10=O)N%11.CC(C)C[CH](C(O)=O)N%10                    | 5.8_3 |
| O=C%11CN1C2=C(C=CC=C2)C3=CC=CC=C31.OC(C=C1)=CC=C1C[CH](C%10=O)N%11.C[CH](C(O)=O)N%10                         | 5.8_4 |
| O=C%11CN1C2=C(C=CC=C2)C3=CC=CC=C31.OC(C=C1)=CC=C1C[CH](C%10=O)N%11.O=C(O)[CH](CC1=CC=CC=C1)N%10              | 5.8_5 |
| O=C%11CN1C2=C(C=CC=C2)C3=CC=CC=C31.OC(C=C1)=CC=C1C[CH](C%10=O)N%11.CC[C][H](C)[CH](C(O)=O)N%10               | 5.8_6 |
| O=C%11CN1C2=C(C=CC=C2)C3=CC=CC=C31.OC(C=C1)=CC=C1C[CH](C%10=O)N%11.CSCC[CH](C(O)=O)N%10                      | 5.8_7 |
| O=C%11CN1C2=C(C=CC=C2)C3=CC=CC=C31.OC(C=C1)=CC=C1C[CH](C%10=O)N%11.OC(C=C1)=CC=C1C[CH](C(O)=O)N%10           | 5.8_8 |
| O=C%11CN1C2=C(C=CC=C2)C3=CC=CC=C31.OC(C=C1)=CC=C1C[CH](C%10=O)N%11.O=C(O)[CH](CC1=C(F)C(F)=C(F)C(F)=C1F)N%10 | 5.8_9 |
| O=C%10CN1C2=C(C=CC=C2)C3=CC=CC=C31.O=C(O)CN%10                                                               | 5.9_1 |
| O=C%10CN1C2=C(C=CC=C2)C3=CC=CC=C31.CC(C)[CH](C(O)=O)N%10                                                     | 5.9_2 |
| O=C%10CN1C2=C(C=CC=C2)C3=CC=CC=C31.CC(C)C[CH](C(O)=O)N%10                                                    | 5.9_3 |
| O=C%10CN1C2=C(C=CC=C2)C3=CC=CC=C31.C[CH](C(O)=O)N%10                                                         | 5.9_4 |
| O=C%10CN1C2=C(C=CC=C2)C3=CC=CC=C31.O=C(O)[CH](CC1=CC=CC=C1)N%10                                              | 5.9_5 |
| O=C%10CN1C2=C(C=CC=C2)C3=CC=CC=C31.CC[CH](C)[CH](C(O)=O)N%10                                                 | 5.9_6 |
| O=C%10CN1C2=C(C=CC=C2)C3=CC=CC=C31.CSCC[CH](C(O)=O)N%10                                                      | 5.9_7 |
| O=C%10CN1C2=C(C=CC=C2)C3=CC=CC=C31.OC(C=C1)=CC=C1C[CH](C(O)=O)N%10                                           | 5.9_8 |

|                                                                                                |       |
|------------------------------------------------------------------------------------------------|-------|
| O=C%10CN1C2=C(C=CC=C2)C3=CC=CC=C31.O=C(O)[CH](CC1=C(F)C(F)=C(F)C(F)=C1F)N%10                   | 5.9_9 |
| O=C%11COC1=CC=C(C(F)(F)F)C=C1.O=C%10CN%11.O=C(O)CN%10                                          | 6.1_1 |
| O=C%11COC1=CC=C(C(F)(F)F)C=C1.O=C%10CN%11.CC(C)[CH](C(O)=O)N%10                                | 6.1_2 |
| O=C%11COC1=CC=C(C(F)(F)F)C=C1.O=C%10CN%11.CC(C)C[CH](C(O)=O)N%10                               | 6.1_3 |
| O=C%11COC1=CC=C(C(F)(F)F)C=C1.O=C%10CN%11.C[CH](C(O)=O)N%10                                    | 6.1_4 |
| O=C%11COC1=CC=C(C(F)(F)F)C=C1.O=C%10CN%11.O=C(O)[CH](CC1=CC=CC=C1)N%10                         | 6.1_5 |
| O=C%11COC1=CC=C(C(F)(F)F)C=C1.O=C%10CN%11.CC[CH](C)[CH](C(O)=O)N%10                            | 6.1_6 |
| O=C%11COC1=CC=C(C(F)(F)F)C=C1.O=C%10CN%11.CSCC[CH](C(O)=O)N%10                                 | 6.1_7 |
| O=C%11COC1=CC=C(C(F)(F)F)C=C1.O=C%10CN%11.OC(C=C1)=CC=C1C[CH](C(O)=O)N%10                      | 6.1_8 |
| O=C%11COC1=CC=C(C(F)(F)F)C=C1.O=C%10CN%11.O=C(O)[CH](CC1=C(F)C(F)=C(F)C(F)=C1F)N%10            | 6.1_9 |
| O=C%11COC1=CC=C(C(F)(F)F)C=C1.CC(C)[CH](C%10=O)N%11.O=C(O)CN%10                                | 6.2_1 |
| O=C%11COC1=CC=C(C(F)(F)F)C=C1.CC(C)[CH](C%10=O)N%11.CC(C)[CH](C(O)=O)N%10                      | 6.2_2 |
| O=C%11COC1=CC=C(C(F)(F)F)C=C1.CC(C)[CH](C%10=O)N%11.CC(C)C[CH](C(O)=O)N%10                     | 6.2_3 |
| O=C%11COC1=CC=C(C(F)(F)F)C=C1.CC(C)[CH](C%10=O)N%11.C[CH](C(O)=O)N%10                          | 6.2_4 |
| O=C%11COC1=CC=C(C(F)(F)F)C=C1.CC(C)[CH](C%10=O)N%11.O=C(O)[CH](CC1=CC=CC=C1)N%10               | 6.2_5 |
| O=C%11COC1=CC=C(C(F)(F)F)C=C1.CC(C)[CH](C%10=O)N%11.CC[CH](C)[CH](C(O)=O)N%10                  | 6.2_6 |
| O=C%11COC1=CC=C(C(F)(F)F)C=C1.CC(C)[CH](C%10=O)N%11.CSCC[CH](C(O)=O)N%10                       | 6.2_7 |
| O=C%11COC1=CC=C(C(F)(F)F)C=C1.CC(C)[CH](C%10=O)N%11.OC(C=C1)=CC=C1C[CH](C(O)=O)N%10            | 6.2_8 |
| O=C%11COC1=CC=C(C(F)(F)F)C=C1.CC(C)[CH](C%10=O)N%11.O=C(O)[CH](CC1=C(F)C(F)=C(F)C(F)=C1F)N%10  | 6.2_9 |
| O=C%11COC1=CC=C(C(F)(F)F)C=C1.CC(C)C[CH](C%10=O)N%11.O=C(O)CN%10                               | 6.3_1 |
| O=C%11COC1=CC=C(C(F)(F)F)C=C1.CC(C)C[CH](C%10=O)N%11.CC(C)[CH](C(O)=O)N%10                     | 6.3_2 |
| O=C%11COC1=CC=C(C(F)(F)F)C=C1.CC(C)C[CH](C%10=O)N%11.CC(C)C[CH](C(O)=O)N%10                    | 6.3_3 |
| O=C%11COC1=CC=C(C(F)(F)F)C=C1.CC(C)C[CH](C%10=O)N%11.C[CH](C(O)=O)N%10                         | 6.3_4 |
| O=C%11COC1=CC=C(C(F)(F)F)C=C1.CC(C)C[CH](C%10=O)N%11.O=C(O)[CH](CC1=CC=CC=C1)N%10              | 6.3_5 |
| O=C%11COC1=CC=C(C(F)(F)F)C=C1.CC(C)C[CH](C%10=O)N%11.CC[CH](C)[CH](C(O)=O)N%10                 | 6.3_6 |
| O=C%11COC1=CC=C(C(F)(F)F)C=C1.CC(C)C[CH](C%10=O)N%11.CSCC[CH](C(O)=O)N%10                      | 6.3_7 |
| O=C%11COC1=CC=C(C(F)(F)F)C=C1.CC(C)C[CH](C%10=O)N%11.OC(C=C1)=CC=C1C[CH](C(O)=O)N%10           | 6.3_8 |
| O=C%11COC1=CC=C(C(F)(F)F)C=C1.CC(C)C[CH](C%10=O)N%11.O=C(O)[CH](CC1=C(F)C(F)=C(F)C(F)=C1F)N%10 | 6.3_9 |
| O=C%11COC1=CC=C(C(F)(F)F)C=C1.C[CH](C%10=O)N%11.O=C(O)CN%10                                    | 6.4_1 |
| O=C%11COC1=CC=C(C(F)(F)F)C=C1.C[CH](C%10=O)N%11.CC(C)[CH](C(O)=O)N%10                          | 6.4_2 |
| O=C%11COC1=CC=C(C(F)(F)F)C=C1.C[CH](C%10=O)N%11.CC(C)C[CH](C(O)=O)N%10                         | 6.4_3 |
| O=C%11COC1=CC=C(C(F)(F)F)C=C1.C[CH](C%10=O)N%11.C[CH](C(O)=O)N%10                              | 6.4_4 |
| O=C%11COC1=CC=C(C(F)(F)F)C=C1.C[CH](C%10=O)N%11.O=C(O)[CH](CC1=CC=CC=C1)N%10                   | 6.4_5 |
| O=C%11COC1=CC=C(C(F)(F)F)C=C1.C[CH](C%10=O)N%11.CC[CH](C)[CH](C(O)=O)N%10                      | 6.4_6 |
| O=C%11COC1=CC=C(C(F)(F)F)C=C1.C[CH](C%10=O)N%11.CSCC[CH](C(O)=O)N%10                           | 6.4_7 |

|                                                                                                      |       |
|------------------------------------------------------------------------------------------------------|-------|
| O=C%11COC1=CC=C(C(F)(F)F)C=C1.C[CH](C%10=O)N%11.OC(C=C1)=CC=C1C[CH](C(O)=O)N%10                      | 6.4_8 |
| O=C%11COC1=CC=C(C(F)(F)F)C=C1.C[CH](C%10=O)N%11.O=C(O)[CH](CC1=C(F)C(F)=C(F)C(F)=C1F)N%10            | 6.4_9 |
| O=C%11COC1=CC=C(C(F)(F)F)C=C1.O=C%10[CH](CC1=CC=CC=C1)N%11.O=C(O)CN%10                               | 6.5_1 |
| O=C%11COC1=CC=C(C(F)(F)F)C=C1.O=C%10[CH](CC1=CC=CC=C1)N%11.CC(C)[CH](C(O)=O)N%10                     | 6.5_2 |
| O=C%11COC1=CC=C(C(F)(F)F)C=C1.O=C%10[CH](CC1=CC=CC=C1)N%11.CC(C)C[CH](C(O)=O)N%10                    | 6.5_3 |
| O=C%11COC1=CC=C(C(F)(F)F)C=C1.O=C%10[CH](CC1=CC=CC=C1)N%11.C[CH](C(O)=O)N%10                         | 6.5_4 |
| O=C%11COC1=CC=C(C(F)(F)F)C=C1.O=C%10[CH](CC1=CC=CC=C1)N%11.O=C(O)[CH](CC1=CC=CC=C1)N%10              | 6.5_5 |
| O=C%11COC1=CC=C(C(F)(F)F)C=C1.O=C%10[CH](CC1=CC=CC=C1)N%11.CC[CH](C)[CH](C(O)=O)N%10                 | 6.5_6 |
| O=C%11COC1=CC=C(C(F)(F)F)C=C1.O=C%10[CH](CC1=CC=CC=C1)N%11.CSCC[CH](C(O)=O)N%10                      | 6.5_7 |
| O=C%11COC1=CC=C(C(F)(F)F)C=C1.O=C%10[CH](CC1=CC=CC=C1)N%11.OC(C=C1)=CC=C1C[CH](C(O)=O)N%10           | 6.5_8 |
| O=C%11COC1=CC=C(C(F)(F)F)C=C1.O=C%10[CH](CC1=CC=CC=C1)N%11.O=C(O)[CH](CC1=C(F)C(F)=C(F)C(F)=C1F)N%10 | 6.5_9 |
| O=C%11COC1=CC=C(C(F)(F)F)C=C1.CC[CH](C)[CH](C%10=O)N%11.O=C(O)CN%10                                  | 6.6_1 |
| O=C%11COC1=CC=C(C(F)(F)F)C=C1.CC[CH](C)[CH](C%10=O)N%11.CC(C)[CH](C(O)=O)N%10                        | 6.6_2 |
| O=C%11COC1=CC=C(C(F)(F)F)C=C1.CC[CH](C)[CH](C%10=O)N%11.CC(C)C[CH](C(O)=O)N%10                       | 6.6_3 |
| O=C%11COC1=CC=C(C(F)(F)F)C=C1.CC[CH](C)[CH](C%10=O)N%11.C[CH](C(O)=O)N%10                            | 6.6_4 |
| O=C%11COC1=CC=C(C(F)(F)F)C=C1.CC[CH](C)[CH](C%10=O)N%11.O=C(O)[CH](CC1=CC=C1)N%10                    | 6.6_5 |
| O=C%11COC1=CC=C(C(F)(F)F)C=C1.CC[CH](C)[CH](C%10=O)N%11.CC[CH](C)[CH](C(O)=O)N%10                    | 6.6_6 |
| O=C%11COC1=CC=C(C(F)(F)F)C=C1.CC[CH](C)[CH](C%10=O)N%11.CSCC[CH](C(O)=O)N%10                         | 6.6_7 |
| O=C%11COC1=CC=C(C(F)(F)F)C=C1.CC[CH](C)[CH](C%10=O)N%11.OC(C=C1)=CC=C1C[CH](C(O)=O)N%10              | 6.6_8 |
| O=C%11COC1=CC=C(C(F)(F)F)C=C1.CC[CH](C)[CH](C%10=O)N%11.O=C(O)[CH](CC1=C(F)C(F)=C(F)C(F)=C1F)N%10    | 6.6_9 |
| O=C%11COC1=CC=C(C(F)(F)F)C=C1.CSCC[CH](C%10=O)N%11.O=C(O)CN%10                                       | 6.7_1 |
| O=C%11COC1=CC=C(C(F)(F)F)C=C1.CSCC[CH](C%10=O)N%11.CC(C)[CH](C(O)=O)N%10                             | 6.7_2 |
| O=C%11COC1=CC=C(C(F)(F)F)C=C1.CSCC[CH](C%10=O)N%11.CC(C)C[CH](C(O)=O)N%10                            | 6.7_3 |
| O=C%11COC1=CC=C(C(F)(F)F)C=C1.CSCC[CH](C%10=O)N%11.C[CH](C(O)=O)N%10                                 | 6.7_4 |
| O=C%11COC1=CC=C(C(F)(F)F)C=C1.CSCC[CH](C%10=O)N%11.O=C(O)[CH](CC1=CC=CC=C1)N%10                      | 6.7_5 |
| O=C%11COC1=CC=C(C(F)(F)F)C=C1.CSCC[CH](C%10=O)N%11.CC[CH](C)[CH](C(O)=O)N%10                         | 6.7_6 |
| O=C%11COC1=CC=C(C(F)(F)F)C=C1.CSCC[CH](C%10=O)N%11.CSCC[CH](C(O)=O)N%10                              | 6.7_7 |
| O=C%11COC1=CC=C(C(F)(F)F)C=C1.CSCC[CH](C%10=O)N%11.OC(C=C1)=CC=C1C[CH](C(O)=O)N%10                   | 6.7_8 |

|                                                                                                        |       |
|--------------------------------------------------------------------------------------------------------|-------|
| O=C%11COC1=CC=C(C(F)(F)F)C=C1.CSCC[CH](C%10=O)N%11.O=C(O)[CH](CC1=C(F)C(F)=C(F)C(F)=C1F)N%10           | 6.7_9 |
| O=C%11COC1=CC=C(C(F)(F)F)C=C1.OC(C=C1)=CC=C1C[CH](C%10=O)N%11.O=C(O)CN%10                              | 6.8_1 |
| O=C%11COC1=CC=C(C(F)(F)F)C=C1.OC(C=C1)=CC=C1C[CH](C%10=O)N%11.CC(C)[CH](C(O)=O)N%10                    | 6.8_2 |
| O=C%11COC1=CC=C(C(F)(F)F)C=C1.OC(C=C1)=CC=C1C[CH](C%10=O)N%11.CC(C)C[CH](C(O)=O)N%10                   | 6.8_3 |
| O=C%11COC1=CC=C(C(F)(F)F)C=C1.OC(C=C1)=CC=C1C[CH](C%10=O)N%11.C[CH](C(O)=O)N%10                        | 6.8_4 |
| O=C%11COC1=CC=C(C(F)(F)F)C=C1.OC(C=C1)=CC=C1C[CH](C%10=O)N%11.O=C(O)[CH](C1=CC=CC=C1)N%10              | 6.8_5 |
| O=C%11COC1=CC=C(C(F)(F)F)C=C1.OC(C=C1)=CC=C1C[CH](C%10=O)N%11.CC[CH](C)[CH](C(O)=O)N%10                | 6.8_6 |
| O=C%11COC1=CC=C(C(F)(F)F)C=C1.OC(C=C1)=CC=C1C[CH](C%10=O)N%11.CSCC[CH](C(O)=O)N%10                     | 6.8_7 |
| O=C%11COC1=CC=C(C(F)(F)F)C=C1.OC(C=C1)=CC=C1C[CH](C%10=O)N%11.OC(C=C1)=CC=C1C[CH](C(O)=O)N%10          | 6.8_8 |
| O=C%11COC1=CC=C(C(F)(F)F)C=C1.OC(C=C1)=CC=C1C[CH](C%10=O)N%11.O=C(O)[CH](C1=C(F)C(F)=C(F)C(F)=C1F)N%10 | 6.8_9 |
| O=C%10COC1=CC=C(C(F)(F)F)C=C1.O=C(O)CN%10                                                              | 6.9_1 |
| O=C%10COC1=CC=C(C(F)(F)F)C=C1.CC(C)[CH](C(O)=O)N%10                                                    | 6.9_2 |
| O=C%10COC1=CC=C(C(F)(F)F)C=C1.CC(C)C[CH](C(O)=O)N%10                                                   | 6.9_3 |
| O=C%10COC1=CC=C(C(F)(F)F)C=C1.C[CH](C(O)=O)N%10                                                        | 6.9_4 |
| O=C%10COC1=CC=C(C(F)(F)F)C=C1.O=C(O)[CH](CC1=CC=CC=C1)N%10                                             | 6.9_5 |
| O=C%10COC1=CC=C(C(F)(F)F)C=C1.CC[CH](C)[CH](C(O)=O)N%10                                                | 6.9_6 |
| O=C%10COC1=CC=C(C(F)(F)F)C=C1.CSCC[CH](C(O)=O)N%10                                                     | 6.9_7 |
| O=C%10COC1=CC=C(C(F)(F)F)C=C1.OC(C=C1)=CC=C1C[CH](C(O)=O)N%10                                          | 6.9_8 |
| O=C%10COC1=CC=C(C(F)(F)F)C=C1.O=C(O)[CH](CC1=C(F)C(F)=C(F)C(F)=C1F)N%10                                | 6.9_9 |
| C%11(COC1=CC(CCCC2)=C2C=C1)=O.O=C%10CN%11.O=C(O)CN%10                                                  | 7.1_1 |
| C%11(COC1=CC(CCCC2)=C2C=C1)=O.O=C%10CN%11.CC(C)[CH](C(O)=O)N%10                                        | 7.1_2 |
| C%11(COC1=CC(CCCC2)=C2C=C1)=O.O=C%10CN%11.CC(C)C[CH](C(O)=O)N%10                                       | 7.1_3 |
| C%11(COC1=CC(CCCC2)=C2C=C1)=O.O=C%10CN%11.C[CH](C(O)=O)N%10                                            | 7.1_4 |
| C%11(COC1=CC(CCCC2)=C2C=C1)=O.O=C%10CN%11.O=C(O)[CH](CC1=CC=CC=C1)N%10                                 | 7.1_5 |
| C%11(COC1=CC(CCCC2)=C2C=C1)=O.O=C%10CN%11.CC[CH](C)[CH](C(O)=O)N%10                                    | 7.1_6 |
| C%11(COC1=CC(CCCC2)=C2C=C1)=O.O=C%10CN%11.CSCC[CH](C(O)=O)N%10                                         | 7.1_7 |
| C%11(COC1=CC(CCCC2)=C2C=C1)=O.O=C%10CN%11.OC(C=C1)=CC=C1C[CH](C(O)=O)N%10                              | 7.1_8 |
| C%11(COC1=CC(CCCC2)=C2C=C1)=O.O=C%10CN%11.O=C(O)[CH](CC1=C(F)C(F)=C(F)C(F)=C1F)N%10                    | 7.1_9 |
| C%11(COC1=CC(CCCC2)=C2C=C1)=O.CC(C)[CH](C%10=O)N%11.O=C(O)CN%10                                        | 7.2_1 |
| C%11(COC1=CC(CCCC2)=C2C=C1)=O.CC(C)[CH](C%10=O)N%11.CC(C)[CH](C(O)=O)N%10                              | 7.2_2 |
| C%11(COC1=CC(CCCC2)=C2C=C1)=O.CC(C)[CH](C%10=O)N%11.CC(C)C[CH](C(O)=O)N%10                             | 7.2_3 |
| C%11(COC1=CC(CCCC2)=C2C=C1)=O.CC(C)[CH](C%10=O)N%11.C[CH](C(O)=O)N%10                                  | 7.2_4 |
| C%11(COC1=CC(CCCC2)=C2C=C1)=O.CC(C)[CH](C%10=O)N%11.O=C(O)[CH](CC1=CC=CC=C1)N%10                       | 7.2_5 |
| C%11(COC1=CC(CCCC2)=C2C=C1)=O.CC(C)[CH](C%10=O)N%11.CC[CH](C)[CH](C(O)=O)N%10                          | 7.2_6 |



|                                                                                                      |       |
|------------------------------------------------------------------------------------------------------|-------|
| C%11(COC1=CC(CCCC2)=C2C=C1)=O.CC(C)[CH](C%10=O)N%11.CSCC[CH](C(O)=O)N%10                             | 7.2_7 |
| C%11(COC1=CC(CCCC2)=C2C=C1)=O.CC(C)[CH](C%10=O)N%11.OC(C=C1)=CC=C1C[CH](C(O)=O)N%10                  | 7.2_8 |
| C%11(COC1=CC(CCCC2)=C2C=C1)=O.CC(C)[CH](C%10=O)N%11.O=C(O)[CH](CC1=C(F)C(F)=C(F)C(F)=C1F)N%10        | 7.2_9 |
| C%11(COC1=CC(CCCC2)=C2C=C1)=O.CC(C)C[CH](C%10=O)N%11.O=C(O)CN%10                                     | 7.3_1 |
| C%11(COC1=CC(CCCC2)=C2C=C1)=O.CC(C)C[CH](C%10=O)N%11.CC(C)[CH](C(O)=O)N%10                           | 7.3_2 |
| C%11(COC1=CC(CCCC2)=C2C=C1)=O.CC(C)C[CH](C%10=O)N%11.CC(C)C[CH](C(O)=O)N%10                          | 7.3_3 |
| C%11(COC1=CC(CCCC2)=C2C=C1)=O.CC(C)C[CH](C%10=O)N%11.C[CH](C(O)=O)N%10                               | 7.3_4 |
| C%11(COC1=CC(CCCC2)=C2C=C1)=O.CC(C)C[CH](C%10=O)N%11.O=C(O)[CH](CC1=CC=CC=C1)N%10                    | 7.3_5 |
| C%11(COC1=CC(CCCC2)=C2C=C1)=O.CC(C)C[CH](C%10=O)N%11.CC[CH](C)[CH](C(O)=O)N%10                       | 7.3_6 |
| C%11(COC1=CC(CCCC2)=C2C=C1)=O.CC(C)C[CH](C%10=O)N%11.CSCC[CH](C(O)=O)N%10                            | 7.3_7 |
| C%11(COC1=CC(CCCC2)=C2C=C1)=O.CC(C)C[CH](C%10=O)N%11.OC(C=C1)=CC=C1C[CH](C(O)=O)N%10                 | 7.3_8 |
| C%11(COC1=CC(CCCC2)=C2C=C1)=O.CC(C)C[CH](C%10=O)N%11.O=C(O)[CH](CC1=C(F)C(F)=C(F)C(F)=C1F)N%10       | 7.3_9 |
| C%11(COC1=CC(CCCC2)=C2C=C1)=O.C[CH](C%10=O)N%11.O=C(O)CN%10                                          | 7.4_1 |
| C%11(COC1=CC(CCCC2)=C2C=C1)=O.C[CH](C%10=O)N%11.CC(C)[CH](C(O)=O)N%10                                | 7.4_2 |
| C%11(COC1=CC(CCCC2)=C2C=C1)=O.C[CH](C%10=O)N%11.CC(C)C[CH](C(O)=O)N%10                               | 7.4_3 |
| C%11(COC1=CC(CCCC2)=C2C=C1)=O.C[CH](C%10=O)N%11.C[CH](C(O)=O)N%10                                    | 7.4_4 |
| C%11(COC1=CC(CCCC2)=C2C=C1)=O.C[CH](C%10=O)N%11.O=C(O)[CH](CC1=CC=CC=C1)N%10                         | 7.4_5 |
| C%11(COC1=CC(CCCC2)=C2C=C1)=O.C[CH](C%10=O)N%11.CC[CH](C)[CH](C(O)=O)N%10                            | 7.4_6 |
| C%11(COC1=CC(CCCC2)=C2C=C1)=O.C[CH](C%10=O)N%11.CSCC[CH](C(O)=O)N%10                                 | 7.4_7 |
| C%11(COC1=CC(CCCC2)=C2C=C1)=O.C[CH](C%10=O)N%11.OC(C=C1)=CC=C1C[CH](C(O)=O)N%10                      | 7.4_8 |
| C%11(COC1=CC(CCCC2)=C2C=C1)=O.C[CH](C%10=O)N%11.O=C(O)[CH](CC1=C(F)C(F)=C(F)C(F)=C1F)N%10            | 7.4_9 |
| C%11(COC1=CC(CCCC2)=C2C=C1)=O.O=C%10[CH](CC1=CC=CC=C1)N%11.O=C(O)CN%10                               | 7.5_1 |
| C%11(COC1=CC(CCCC2)=C2C=C1)=O.O=C%10[CH](CC1=CC=CC=C1)N%11.CC(C)[CH](C(O)=O)N%10                     | 7.5_2 |
| C%11(COC1=CC(CCCC2)=C2C=C1)=O.O=C%10[CH](CC1=CC=CC=C1)N%11.CC(C)C[CH](C(O)=O)N%10                    | 7.5_3 |
| C%11(COC1=CC(CCCC2)=C2C=C1)=O.O=C%10[CH](CC1=CC=CC=C1)N%11.C[CH](C(O)=O)N%10                         | 7.5_4 |
| C%11(COC1=CC(CCCC2)=C2C=C1)=O.O=C%10[CH](CC1=CC=CC=C1)N%11.O=C(O)[CH](CC1=CC=CC=C1)N%10              | 7.5_5 |
| C%11(COC1=CC(CCCC2)=C2C=C1)=O.O=C%10[CH](CC1=CC=CC=C1)N%11.CC[CH](C)[CH](C(O)=O)N%10                 | 7.5_6 |
| C%11(COC1=CC(CCCC2)=C2C=C1)=O.O=C%10[CH](CC1=CC=CC=C1)N%11.CSCC[CH](C(O)=O)N%10                      | 7.5_7 |
| C%11(COC1=CC(CCCC2)=C2C=C1)=O.O=C%10[CH](CC1=CC=CC=C1)N%11.OC(C=C1)=CC=C1C[CH](C(O)=O)N%10           | 7.5_8 |
| C%11(COC1=CC(CCCC2)=C2C=C1)=O.O=C%10[CH](CC1=CC=CC=C1)N%11.O=C(O)[CH](CC1=C(F)C(F)=C(F)C(F)=C1F)N%10 | 7.5_9 |

|                                                                                                         |       |
|---------------------------------------------------------------------------------------------------------|-------|
| C%11(COC1=CC(CCCC2)=C2C=C1)=O.CC[CH](C)[CH](C%10=O)N%11.O=C(O)CN%10                                     | 7.6_1 |
| C%11(COC1=CC(CCCC2)=C2C=C1)=O.CC[CH](C)[CH](C%10=O)N%11.CC(C)[CH](C(O)=O)N%10                           | 7.6_2 |
| C%11(COC1=CC(CCCC2)=C2C=C1)=O.CC[CH](C)[CH](C%10=O)N%11.CC(C)C[CH](C(O)=O)N%10                          | 7.6_3 |
| C%11(COC1=CC(CCCC2)=C2C=C1)=O.CC[CH](C)[CH](C%10=O)N%11.C[CH](C(O)=O)N%10                               | 7.6_4 |
| C%11(COC1=CC(CCCC2)=C2C=C1)=O.CC[CH](C)[CH](C%10=O)N%11.O=C(O)[CH](CC1=CC=CC=C1)N%10                    | 7.6_5 |
| C%11(COC1=CC(CCCC2)=C2C=C1)=O.CC[CH](C)[CH](C%10=O)N%11.CC[CH](C)[CH](C(O)=O)N%10                       | 7.6_6 |
| C%11(COC1=CC(CCCC2)=C2C=C1)=O.CC[CH](C)[CH](C%10=O)N%11.CSCC[CH](C(O)=O)N%10                            | 7.6_7 |
| C%11(COC1=CC(CCCC2)=C2C=C1)=O.CC[CH](C)[CH](C%10=O)N%11.OC(C=C1)=CC=C1C[CH](C(O)=O)N%10                 | 7.6_8 |
| C%11(COC1=CC(CCCC2)=C2C=C1)=O.CC[CH](C)[CH](C%10=O)N%11.O=C(O)[CH](CC1=C(F)C(F)=C(F)C(F)=C1F)N%10       | 7.6_9 |
| C%11(COC1=CC(CCCC2)=C2C=C1)=O.CSCC[CH](C%10=O)N%11.O=C(O)CN%10                                          | 7.7_1 |
| C%11(COC1=CC(CCCC2)=C2C=C1)=O.CSCC[CH](C%10=O)N%11.CC(C)[CH](C(O)=O)N%10                                | 7.7_2 |
| C%11(COC1=CC(CCCC2)=C2C=C1)=O.CSCC[CH](C%10=O)N%11.CC(C)C[CH](C(O)=O)N%10                               | 7.7_3 |
| C%11(COC1=CC(CCCC2)=C2C=C1)=O.CSCC[CH](C%10=O)N%11.C[CH](C(O)=O)N%10                                    | 7.7_4 |
| C%11(COC1=CC(CCCC2)=C2C=C1)=O.CSCC[CH](C%10=O)N%11.O=C(O)[CH](CC1=CC=CC=C1)N%10                         | 7.7_5 |
| C%11(COC1=CC(CCCC2)=C2C=C1)=O.CSCC[CH](C%10=O)N%11.CC[CH](C)[CH](C(O)=O)N%10                            | 7.7_6 |
| C%11(COC1=CC(CCCC2)=C2C=C1)=O.CSCC[CH](C%10=O)N%11.CSCC[CH](C(O)=O)N%10                                 | 7.7_7 |
| C%11(COC1=CC(CCCC2)=C2C=C1)=O.CSCC[CH](C%10=O)N%11.OC(C=C1)=CC=C1C[CH](C(O)=O)N%10                      | 7.7_8 |
| C%11(COC1=CC(CCCC2)=C2C=C1)=O.CSCC[CH](C%10=O)N%11.O=C(O)[CH](CC1=C(F)C(F)=C(F)C(F)=C1F)N%10            | 7.7_9 |
| C%11(COC1=CC(CCCC2)=C2C=C1)=O.OC(C=C1)=CC=C1C[CH](C%10=O)N%11.O=C(O)CN%10                               | 7.8_1 |
| C%11(COC1=CC(CCCC2)=C2C=C1)=O.OC(C=C1)=CC=C1C[CH](C%10=O)N%11.CC(C)[CH](C(O)=O)N%10                     | 7.8_2 |
| C%11(COC1=CC(CCCC2)=C2C=C1)=O.OC(C=C1)=CC=C1C[CH](C%10=O)N%11.CC(C)C[CH](C(O)=O)N%10                    | 7.8_3 |
| C%11(COC1=CC(CCCC2)=C2C=C1)=O.OC(C=C1)=CC=C1C[CH](C%10=O)N%11.C[CH](C(O)=O)N%10                         | 7.8_4 |
| C%11(COC1=CC(CCCC2)=C2C=C1)=O.OC(C=C1)=CC=C1C[CH](C%10=O)N%11.O=C(O)[CH](CC1=CC=CC=C1)N%10              | 7.8_5 |
| C%11(COC1=CC(CCCC2)=C2C=C1)=O.OC(C=C1)=CC=C1C[CH](C%10=O)N%11.CC[CH](C)[CH](C(O)=O)N%10                 | 7.8_6 |
| C%11(COC1=CC(CCCC2)=C2C=C1)=O.OC(C=C1)=CC=C1C[CH](C%10=O)N%11.CSCC[CH](C(O)=O)N%10                      | 7.8_7 |
| C%11(COC1=CC(CCCC2)=C2C=C1)=O.OC(C=C1)=CC=C1C[CH](C%10=O)N%11.OC(C=C1)=CC=C1C[CH](C(O)=O)N%10           | 7.8_8 |
| C%11(COC1=CC(CCCC2)=C2C=C1)=O.OC(C=C1)=CC=C1C[CH](C%10=O)N%11.O=C(O)[CH](CC1=C(F)C(F)=C(F)C(F)=C1F)N%10 | 7.8_9 |
| C%10(COC1=CC(CCCC2)=C2C=C1)=O.O=C(O)CN%10                                                               | 7.9_1 |

|                                                                                            |       |
|--------------------------------------------------------------------------------------------|-------|
| C%10(COC1=CC(CCCC2)=C2C=C1)=O.CC(C)[CH](C(O)=O)N%10                                        | 7.9_2 |
| C%10(COC1=CC(CCCC2)=C2C=C1)=O.CC(C)C[CH](C(O)=O)N%10                                       | 7.9_3 |
| C%10(COC1=CC(CCCC2)=C2C=C1)=O.C[CH](C(O)=O)N%10                                            | 7.9_4 |
| C%10(COC1=CC(CCCC2)=C2C=C1)=O.O=C(O)[CH](CC1=CC=CC=C1)N%10                                 | 7.9_5 |
| C%10(COC1=CC(CCCC2)=C2C=C1)=O.CC[CH](C)[CH](C(O)=O)N%10                                    | 7.9_6 |
| C%10(COC1=CC(CCCC2)=C2C=C1)=O.CSCC[CH](C(O)=O)N%10                                         | 7.9_7 |
| C%10(COC1=CC(CCCC2)=C2C=C1)=O.OC(C=C1)=CC=C1C[CH](C(O)=O)N%10                              | 7.9_8 |
| C%10(COC1=CC(CCCC2)=C2C=C1)=O.O=C(O)[CH](CC1=C(F)C(F)=C(F)C(F)=C1F)N%10                    | 7.9_9 |
| O=C%11COC1=CC=CC2=C1CCCC2.O=C%10CN%11.O=C(O)CN%10                                          | 8.1_1 |
| O=C%11COC1=CC=CC2=C1CCCC2.O=C%10CN%11.CC(C)[CH](C(O)=O)N%10                                | 8.1_2 |
| O=C%11COC1=CC=CC2=C1CCCC2.O=C%10CN%11.CC(C)C[CH](C(O)=O)N%10                               | 8.1_3 |
| O=C%11COC1=CC=CC2=C1CCCC2.O=C%10CN%11.C[CH](C(O)=O)N%10                                    | 8.1_4 |
| O=C%11COC1=CC=CC2=C1CCCC2.O=C%10CN%11.O=C(O)[CH](CC1=CC=CC=C1)N%10                         | 8.1_5 |
| O=C%11COC1=CC=CC2=C1CCCC2.O=C%10CN%11.CC[CH](C)[CH](C(O)=O)N%10                            | 8.1_6 |
| O=C%11COC1=CC=CC2=C1CCCC2.O=C%10CN%11.CSCC[CH](C(O)=O)N%10                                 | 8.1_7 |
| O=C%11COC1=CC=CC2=C1CCCC2.O=C%10CN%11.OC(C=C1)=CC=C1C[CH](C(O)=O)N%10                      | 8.1_8 |
| O=C%11COC1=CC=CC2=C1CCCC2.O=C%10CN%11.O=C(O)[CH](CC1=C(F)C(F)=C(F)C(F)=C1F)N%10            | 8.1_9 |
| O=C%11COC1=CC=CC2=C1CCCC2.CC(C)[CH](C%10=O)N%11.O=C(O)CN%10                                | 8.2_1 |
| O=C%11COC1=CC=CC2=C1CCCC2.CC(C)[CH](C%10=O)N%11.CC(C)[CH](C(O)=O)N%10                      | 8.2_2 |
| O=C%11COC1=CC=CC2=C1CCCC2.CC(C)[CH](C%10=O)N%11.CC(C)C[CH](C(O)=O)N%10                     | 8.2_3 |
| O=C%11COC1=CC=CC2=C1CCCC2.CC(C)[CH](C%10=O)N%11.C[CH](C(O)=O)N%10                          | 8.2_4 |
| O=C%11COC1=CC=CC2=C1CCCC2.CC(C)[CH](C%10=O)N%11.O=C(O)[CH](CC1=CC=CC=C1)N%10               | 8.2_5 |
| O=C%11COC1=CC=CC2=C1CCCC2.CC(C)[CH](C%10=O)N%11.CC[CH](C)[CH](C(O)=O)N%10                  | 8.2_6 |
| O=C%11COC1=CC=CC2=C1CCCC2.CC(C)[CH](C%10=O)N%11.CSCC[CH](C(O)=O)N%10                       | 8.2_7 |
| O=C%11COC1=CC=CC2=C1CCCC2.CC(C)[CH](C%10=O)N%11.OC(C=C1)=CC=C1C[CH](C(O)=O)N%10            | 8.2_8 |
| O=C%11COC1=CC=CC2=C1CCCC2.CC(C)[CH](C%10=O)N%11.O=C(O)[CH](CC1=C(F)C(F)=C(F)C(F)=C1F)N%10  | 8.2_9 |
| O=C%11COC1=CC=CC2=C1CCCC2.CC(C)C[CH](C%10=O)N%11.O=C(O)CN%10                               | 8.3_1 |
| O=C%11COC1=CC=CC2=C1CCCC2.CC(C)C[CH](C%10=O)N%11.CC(C)[CH](C(O)=O)N%10                     | 8.3_2 |
| O=C%11COC1=CC=CC2=C1CCCC2.CC(C)C[CH](C%10=O)N%11.CC(C)C[CH](C(O)=O)N%10                    | 8.3_3 |
| O=C%11COC1=CC=CC2=C1CCCC2.CC(C)C[CH](C%10=O)N%11.C[CH](C(O)=O)N%10                         | 8.3_4 |
| O=C%11COC1=CC=CC2=C1CCCC2.CC(C)C[CH](C%10=O)N%11.O=C(O)[CH](CC1=CC=CC=C1)N%10              | 8.3_5 |
| O=C%11COC1=CC=CC2=C1CCCC2.CC(C)C[CH](C%10=O)N%11.CC[CH](C)[CH](C(O)=O)N%10                 | 8.3_6 |
| O=C%11COC1=CC=CC2=C1CCCC2.CC(C)C[CH](C%10=O)N%11.CSCC[CH](C(O)=O)N%10                      | 8.3_7 |
| O=C%11COC1=CC=CC2=C1CCCC2.CC(C)C[CH](C%10=O)N%11.OC(C=C1)=CC=C1C[CH](C(O)=O)N%10           | 8.3_8 |
| O=C%11COC1=CC=CC2=C1CCCC2.CC(C)C[CH](C%10=O)N%11.O=C(O)[CH](CC1=C(F)C(F)=C(F)C(F)=C1F)N%10 | 8.3_9 |
| O=C%11COC1=CC=CC2=C1CCCC2.C[CH](C%10=O)N%11.O=C(O)CN%10                                    | 8.4_1 |
| O=C%11COC1=CC=CC2=C1CCCC2.C[CH](C%10=O)N%11.CC(C)[CH](C(O)=O)N%10                          | 8.4_2 |

|                                                                                                  |       |
|--------------------------------------------------------------------------------------------------|-------|
| O=C%11COC1=CC=CC2=C1CCCC2.C[CH](C%10=O)N%11.CC(C)C[CH](C(O)=O)N%10                               | 8.4_3 |
| O=C%11COC1=CC=CC2=C1CCCC2.C[CH](C%10=O)N%11.C[CH](C(O)=O)N%10                                    | 8.4_4 |
| O=C%11COC1=CC=CC2=C1CCCC2.C[CH](C%10=O)N%11.O=C(O)[CH](CC1=CC=CC=C1)N%10                         | 8.4_5 |
| O=C%11COC1=CC=CC2=C1CCCC2.C[CH](C%10=O)N%11.CC[CH](C)[CH](C(O)=O)N%10                            | 8.4_6 |
| O=C%11COC1=CC=CC2=C1CCCC2.C[CH](C%10=O)N%11.CSCC[CH](C(O)=O)N%10                                 | 8.4_7 |
| O=C%11COC1=CC=CC2=C1CCCC2.C[CH](C%10=O)N%11.OC(C=C1)=CC=C1C[CH](C(O)=O)N%10                      | 8.4_8 |
| O=C%11COC1=CC=CC2=C1CCCC2.C[CH](C%10=O)N%11.O=C(O)[CH](CC1=C(F)C(F)=C(F)C(F)=C1F)N%10            | 8.4_9 |
| O=C%11COC1=CC=CC2=C1CCCC2.O=C%10[CH](CC1=CC=CC=C1)N%11.O=C(O)CN%10                               | 8.5_1 |
| O=C%11COC1=CC=CC2=C1CCCC2.O=C%10[CH](CC1=CC=CC=C1)N%11.CC(C)[CH](C(O)=O)N%10                     | 8.5_2 |
| O=C%11COC1=CC=CC2=C1CCCC2.O=C%10[CH](CC1=CC=CC=C1)N%11.CC(C)C[CH](C(O)=O)N%10                    | 8.5_3 |
| O=C%11COC1=CC=CC2=C1CCCC2.O=C%10[CH](CC1=CC=CC=C1)N%11.C[CH](C(O)=O)N%10                         | 8.5_4 |
| O=C%11COC1=CC=CC2=C1CCCC2.O=C%10[CH](CC1=CC=CC=C1)N%11.O=C(O)[CH](CC1=CC=CC=C1)N%10              | 8.5_5 |
| O=C%11COC1=CC=CC2=C1CCCC2.O=C%10[CH](CC1=CC=CC=C1)N%11.CC[CH](C)[CH](C(O)=O)N%10                 | 8.5_6 |
| O=C%11COC1=CC=CC2=C1CCCC2.O=C%10[CH](CC1=CC=CC=C1)N%11.CSCC[CH](C(O)=O)N%10                      | 8.5_7 |
| O=C%11COC1=CC=CC2=C1CCCC2.O=C%10[CH](CC1=CC=CC=C1)N%11.OC(C=C1)=CC=C1C[CH](C(O)=O)N%10           | 8.5_8 |
| O=C%11COC1=CC=CC2=C1CCCC2.O=C%10[CH](CC1=CC=CC=C1)N%11.O=C(O)[CH](CC1=C(F)C(F)=C(F)C(F)=C1F)N%10 | 8.5_9 |
| O=C%11COC1=CC=CC2=C1CCCC2.CC[CH](C)[CH](C%10=O)N%11.O=C(O)CN%10                                  | 8.6_1 |
| O=C%11COC1=CC=CC2=C1CCCC2.CC[CH](C)[CH](C%10=O)N%11.CC(C)[CH](C(O)=O)N%10                        | 8.6_2 |
| O=C%11COC1=CC=CC2=C1CCCC2.CC[CH](C)[CH](C%10=O)N%11.CC(C)C[CH](C(O)=O)N%10                       | 8.6_3 |
| O=C%11COC1=CC=CC2=C1CCCC2.CC[CH](C)[CH](C%10=O)N%11.C[CH](C(O)=O)N%10                            | 8.6_4 |
| O=C%11COC1=CC=CC2=C1CCCC2.CC[CH](C)[CH](C%10=O)N%11.O=C(O)[CH](CC1=CC=CC=C1)N%10                 | 8.6_5 |
| O=C%11COC1=CC=CC2=C1CCCC2.CC[CH](C)[CH](C%10=O)N%11.CC[CH](C)[CH](C(O)=O)N%10                    | 8.6_6 |
| O=C%11COC1=CC=CC2=C1CCCC2.CC[CH](C)[CH](C%10=O)N%11.CSCC[CH](C(O)=O)N%10                         | 8.6_7 |
| O=C%11COC1=CC=CC2=C1CCCC2.CC[CH](C)[CH](C%10=O)N%11.OC(C=C1)=CC=C1C[CH](C(O)=O)N%10              | 8.6_8 |
| O=C%11COC1=CC=CC2=C1CCCC2.CC[CH](C)[CH](C%10=O)N%11.O=C(O)[CH](CC1=C(F)C(F)=C(F)C(F)=C1F)N%10    | 8.6_9 |
| O=C%11COC1=CC=CC2=C1CCCC2.CSCC[CH](C%10=O)N%11.O=C(O)CN%10                                       | 8.7_1 |
| O=C%11COC1=CC=CC2=C1CCCC2.CSCC[CH](C%10=O)N%11.CC(C)[CH](C(O)=O)N%10                             | 8.7_2 |
| O=C%11COC1=CC=CC2=C1CCCC2.CSCC[CH](C%10=O)N%11.CC(C)C[CH](C(O)=O)N%10                            | 8.7_3 |
| O=C%11COC1=CC=CC2=C1CCCC2.CSCC[CH](C%10=O)N%11.C[CH](C(O)=O)N%10                                 | 8.7_4 |
| O=C%11COC1=CC=CC2=C1CCCC2.CSCC[CH](C%10=O)N%11.O=C(O)[CH](CC1=CC=CC=C1)N%10                      | 8.7_5 |
| O=C%11COC1=CC=CC2=C1CCCC2.CSCC[CH](C%10=O)N%11.CC[CH](C)[CH](C(O)=O)N%10                         | 8.7_6 |

|                                                                                                     |       |
|-----------------------------------------------------------------------------------------------------|-------|
| O=C%11COC1=CC=CC2=C1CCCC2.CSCC[CH](C%10=O)N%11.CSCC[CH](C(O)=O)N%10                                 | 8.7_7 |
| O=C%11COC1=CC=CC2=C1CCCC2.CSCC[CH](C%10=O)N%11.OC(C=C1)=CC=C1C[CH](C(O)=O)N%10                      | 8.7_8 |
| O=C%11COC1=CC=CC2=C1CCCC2.CSCC[CH](C%10=O)N%11.O=C(O)[CH](CC1=C(F)C(F)=C(F)C(F)=C1F)N%10            | 8.7_9 |
| O=C%11COC1=CC=CC2=C1CCCC2.OC(C=C1)=CC=C1C[CH](C%10=O)N%11.O=C(O)CN%10                               | 8.8_1 |
| O=C%11COC1=CC=CC2=C1CCCC2.OC(C=C1)=CC=C1C[CH](C%10=O)N%11.CC(C)[CH](C(O)=O)N%10                     | 8.8_2 |
| O=C%11COC1=CC=CC2=C1CCCC2.OC(C=C1)=CC=C1C[CH](C%10=O)N%11.CC(C)C[CH](C(O)=O)N%10                    | 8.8_3 |
| O=C%11COC1=CC=CC2=C1CCCC2.OC(C=C1)=CC=C1C[CH](C%10=O)N%11.C[CH](C(O)=O)N%10                         | 8.8_4 |
| O=C%11COC1=CC=CC2=C1CCCC2.OC(C=C1)=CC=C1C[CH](C%10=O)N%11.O=C(O)[CH](CC1=CC=CC=C1)N%10              | 8.8_5 |
| O=C%11COC1=CC=CC2=C1CCCC2.OC(C=C1)=CC=C1C[CH](C%10=O)N%11.CC[CH](C)[CH](C(O)=O)N%10                 | 8.8_6 |
| O=C%11COC1=CC=CC2=C1CCCC2.OC(C=C1)=CC=C1C[CH](C%10=O)N%11.CSCC[CH](C(O)=O)N%10                      | 8.8_7 |
| O=C%11COC1=CC=CC2=C1CCCC2.OC(C=C1)=CC=C1C[CH](C%10=O)N%11.OC(C=C1)=CC=C1C[CH](C(O)=O)N%10           | 8.8_8 |
| O=C%11COC1=CC=CC2=C1CCCC2.OC(C=C1)=CC=C1C[CH](C%10=O)N%11.O=C(O)[CH](CC1=C(F)C(F)=C(F)C(F)=C1F)N%10 | 8.8_9 |
| O=C%10COC1=CC=CC2=C1CCCC2.O=C(O)CN%10                                                               | 8.9_1 |
| O=C%10COC1=CC=CC2=C1CCCC2.CC(C)[CH](C(O)=O)N%10                                                     | 8.9_2 |
| O=C%10COC1=CC=CC2=C1CCCC2.CC(C)C[CH](C(O)=O)N%10                                                    | 8.9_3 |
| O=C%10COC1=CC=CC2=C1CCCC2.C[CH](C(O)=O)N%10                                                         | 8.9_4 |
| O=C%10COC1=CC=CC2=C1CCCC2.O=C(O)[CH](CC1=CC=CC=C1)N%10                                              | 8.9_5 |
| O=C%10COC1=CC=CC2=C1CCCC2.CC[CH](C)[CH](C(O)=O)N%10                                                 | 8.9_6 |
| O=C%10COC1=CC=CC2=C1CCCC2.CSCC[CH](C(O)=O)N%10                                                      | 8.9_7 |
| O=C%10COC1=CC=CC2=C1CCCC2.OC(C=C1)=CC=C1C[CH](C(O)=O)N%10                                           | 8.9_8 |
| O=C%10COC1=CC=CC2=C1CCCC2.O=C(O)[CH](CC1=C(F)C(F)=C(F)C(F)=C1F)N%10                                 | 8.9_9 |
| C%11(COC1=CC=CC2=CC(Br)=CC=C21)=O.O=C%10CN%11.O=C(O)CN%10                                           | 9.1_1 |
| C%11(COC1=CC=CC2=CC(Br)=CC=C21)=O.O=C%10CN%11.CC(C)[CH](C(O)=O)N%10                                 | 9.1_2 |
| C%11(COC1=CC=CC2=CC(Br)=CC=C21)=O.O=C%10CN%11.CC(C)C[CH](C(O)=O)N%10                                | 9.1_3 |
| C%11(COC1=CC=CC2=CC(Br)=CC=C21)=O.O=C%10CN%11.C[CH](C(O)=O)N%10                                     | 9.1_4 |
| C%11(COC1=CC=CC2=CC(Br)=CC=C21)=O.O=C%10CN%11.O=C(O)[CH](CC1=CC=CC=C1)N%10                          | 9.1_5 |
| C%11(COC1=CC=CC2=CC(Br)=CC=C21)=O.O=C%10CN%11.CC[CH](C)[CH](C(O)=O)N%10                             | 9.1_6 |
| C%11(COC1=CC=CC2=CC(Br)=CC=C21)=O.O=C%10CN%11.CSCC[CH](C(O)=O)N%10                                  | 9.1_7 |
| C%11(COC1=CC=CC2=CC(Br)=CC=C21)=O.O=C%10CN%11.OC(C=C1)=CC=C1C[CH](C(O)=O)N%10                       | 9.1_8 |
| C%11(COC1=CC=CC2=CC(Br)=CC=C21)=O.O=C%10CN%11.O=C(O)[CH](CC1=C(F)C(F)=C(F)C(F)=C1F)N%10             | 9.1_9 |
| C%11(COC1=CC=CC2=CC(Br)=CC=C21)=O.CC(C)[CH](C%10=O)N%11.O=C(O)CN%10                                 | 9.2_1 |
| C%11(COC1=CC=CC2=CC(Br)=CC=C21)=O.CC(C)[CH](C%10=O)N%11.CC(C)[CH](C(O)=O)N%10                       | 9.2_2 |
| C%11(COC1=CC=CC2=CC(Br)=CC=C21)=O.CC(C)[CH](C%10=O)N%11.CC(C)C[CH](C(O)=O)                          | 9.2_3 |

|                                                                                                    |       |
|----------------------------------------------------------------------------------------------------|-------|
| N%10                                                                                               |       |
| C%11(COC1=CC=CC2=CC(Br)=CC=C21)=O.CC(C)[CH](C%10=O)N%11.C[CH](C(O)=O)N%10                          | 9.2_4 |
| C%11(COC1=CC=CC2=CC(Br)=CC=C21)=O.CC(C)[CH](C%10=O)N%11.O=C(O)[CH](CC1=CC=CC=C1)N%10               | 9.2_5 |
| C%11(COC1=CC=CC2=CC(Br)=CC=C21)=O.CC(C)[CH](C%10=O)N%11.CC[CH](C)[CH](C(O)=O)N%10                  | 9.2_6 |
| C%11(COC1=CC=CC2=CC(Br)=CC=C21)=O.CC(C)[CH](C%10=O)N%11.CSCC[CH](C(O)=O)N%10                       | 9.2_7 |
| C%11(COC1=CC=CC2=CC(Br)=CC=C21)=O.CC(C)[CH](C%10=O)N%11.OC(C=C1)=CC=C1C[CH](C(O)=O)N%10            | 9.2_8 |
| C%11(COC1=CC=CC2=CC(Br)=CC=C21)=O.CC(C)[CH](C%10=O)N%11.O=C(O)[CH](CC1=C(F)C(F)=C(F)C(F)=C1F)N%10  | 9.2_9 |
| C%11(COC1=CC=CC2=CC(Br)=CC=C21)=O.CC(C)C[CH](C%10=O)N%11.O=C(O)CN%10                               | 9.3_1 |
| C%11(COC1=CC=CC2=CC(Br)=CC=C21)=O.CC(C)C[CH](C%10=O)N%11.CC(C)[CH](C(O)=O)N%10                     | 9.3_2 |
| C%11(COC1=CC=CC2=CC(Br)=CC=C21)=O.CC(C)C[CH](C%10=O)N%11.CC(C)C[CH](C(O)=O)N%10                    | 9.3_3 |
| C%11(COC1=CC=CC2=CC(Br)=CC=C21)=O.CC(C)C[CH](C%10=O)N%11.C[CH](C(O)=O)N%10                         | 9.3_4 |
| C%11(COC1=CC=CC2=CC(Br)=CC=C21)=O.CC(C)C[CH](C%10=O)N%11.O=C(O)[CH](CC1=CC=CC=C1)N%10              | 9.3_5 |
| C%11(COC1=CC=CC2=CC(Br)=CC=C21)=O.CC(C)C[CH](C%10=O)N%11.CC[CH](C)[CH](C(O)=O)N%10                 | 9.3_6 |
| C%11(COC1=CC=CC2=CC(Br)=CC=C21)=O.CC(C)C[CH](C%10=O)N%11.CSCC[CH](C(O)=O)N%10                      | 9.3_7 |
| C%11(COC1=CC=CC2=CC(Br)=CC=C21)=O.CC(C)C[CH](C%10=O)N%11.OC(C=C1)=CC=C1C[CH](C(O)=O)N%10           | 9.3_8 |
| C%11(COC1=CC=CC2=CC(Br)=CC=C21)=O.CC(C)C[CH](C%10=O)N%11.O=C(O)[CH](CC1=C(F)C(F)=C(F)C(F)=C1F)N%10 | 9.3_9 |
| C%11(COC1=CC=CC2=CC(Br)=CC=C21)=O.C[CH](C%10=O)N%11.O=C(O)CN%10                                    | 9.4_1 |
| C%11(COC1=CC=CC2=CC(Br)=CC=C21)=O.C[CH](C%10=O)N%11.CC(C)[CH](C(O)=O)N%10                          | 9.4_2 |
| C%11(COC1=CC=CC2=CC(Br)=CC=C21)=O.C[CH](C%10=O)N%11.CC(C)C[CH](C(O)=O)N%10                         | 9.4_3 |
| C%11(COC1=CC=CC2=CC(Br)=CC=C21)=O.C[CH](C%10=O)N%11.C[CH](C(O)=O)N%10                              | 9.4_4 |
| C%11(COC1=CC=CC2=CC(Br)=CC=C21)=O.C[CH](C%10=O)N%11.O=C(O)[CH](CC1=CC=CC=C1)N%10                   | 9.4_5 |
| C%11(COC1=CC=CC2=CC(Br)=CC=C21)=O.C[CH](C%10=O)N%11.CC[CH](C)[CH](C(O)=O)N%10                      | 9.4_6 |
| C%11(COC1=CC=CC2=CC(Br)=CC=C21)=O.C[CH](C%10=O)N%11.CSCC[CH](C(O)=O)N%10                           | 9.4_7 |
| C%11(COC1=CC=CC2=CC(Br)=CC=C21)=O.C[CH](C%10=O)N%11.OC(C=C1)=CC=C1C[CH](C(O)=O)N%10                | 9.4_8 |
| C%11(COC1=CC=CC2=CC(Br)=CC=C21)=O.C[CH](C%10=O)N%11.O=C(O)[CH](CC1=C(F)C(F)=C(F)C(F)=C1F)N%10      | 9.4_9 |
| C%11(COC1=CC=CC2=CC(Br)=CC=C21)=O.O=C%10[CH](CC1=CC=CC=C1)N%11.O=C(O)CN%10                         | 9.5_1 |
| C%11(COC1=CC=CC2=CC(Br)=CC=C21)=O.O=C%10[CH](CC1=CC=CC=C1)N%11.CC(C)[CH](C(O)=O)N%10               | 9.5_2 |
| C%11(COC1=CC=CC2=CC(Br)=CC=C21)=O.O=C%10[CH](CC1=CC=CC=C1)N%11.CC(C)C[CH]                          | 9.5_3 |

|                                                                                                          |       |
|----------------------------------------------------------------------------------------------------------|-------|
| (C(O)=O)N%10                                                                                             |       |
| C%11(COC1=CC=CC2=CC(Br)=CC=C21)=O.O=C%10[CH](CC1=CC=CC=C1)N%11.C[CH](C(O)=O)N%10                         | 9.5_4 |
| C%11(COC1=CC=CC2=CC(Br)=CC=C21)=O.O=C%10[CH](CC1=CC=CC=C1)N%11.O=C(O)[CH](CC1=CC=CC=C1)N%10              | 9.5_5 |
| C%11(COC1=CC=CC2=CC(Br)=CC=C21)=O.O=C%10[CH](CC1=CC=CC=C1)N%11.CC[CH](C)[CH](C(O)=O)N%10                 | 9.5_6 |
| C%11(COC1=CC=CC2=CC(Br)=CC=C21)=O.O=C%10[CH](CC1=CC=CC=C1)N%11.CSCC[CH](C(O)=O)N%10                      | 9.5_7 |
| C%11(COC1=CC=CC2=CC(Br)=CC=C21)=O.O=C%10[CH](CC1=CC=CC=C1)N%11.OC(C=C1)=CC=C1C[CH](C(O)=O)N%10           | 9.5_8 |
| C%11(COC1=CC=CC2=CC(Br)=CC=C21)=O.O=C%10[CH](CC1=CC=CC=C1)N%11.O=C(O)[CH](CC1=C(F)C(F)=C(F)C(F)=C1F)N%10 | 9.5_9 |
| C%11(COC1=CC=CC2=CC(Br)=CC=C21)=O.CC[CH](C)[CH](C%10=O)N%11.O=C(O)CN%10                                  | 9.6_1 |
| C%11(COC1=CC=CC2=CC(Br)=CC=C21)=O.CC[CH](C)[CH](C%10=O)N%11.CC(C)[CH](C(O)=O)N%10                        | 9.6_2 |
| C%11(COC1=CC=CC2=CC(Br)=CC=C21)=O.CC[CH](C)[CH](C%10=O)N%11.CC(C)C[CH](C(O)=O)N%10                       | 9.6_3 |
| C%11(COC1=CC=CC2=CC(Br)=CC=C21)=O.CC[CH](C)[CH](C%10=O)N%11.C[CH](C(O)=O)N%10                            | 9.6_4 |
| C%11(COC1=CC=CC2=CC(Br)=CC=C21)=O.CC[CH](C)[CH](C%10=O)N%11.O=C(O)[CH](CC1=CC=CC=C1)N%10                 | 9.6_5 |
| C%11(COC1=CC=CC2=CC(Br)=CC=C21)=O.CC[CH](C)[CH](C%10=O)N%11.CC[CH](C)[CH](C(O)=O)N%10                    | 9.6_6 |
| C%11(COC1=CC=CC2=CC(Br)=CC=C21)=O.CC[CH](C)[CH](C%10=O)N%11.CSCC[CH](C(O)=O)N%10                         | 9.6_7 |
| C%11(COC1=CC=CC2=CC(Br)=CC=C21)=O.CC[CH](C)[CH](C%10=O)N%11.OC(C=C1)=CC=C1C[CH](C(O)=O)N%10              | 9.6_8 |
| C%11(COC1=CC=CC2=CC(Br)=CC=C21)=O.CC[CH](C)[CH](C%10=O)N%11.O=C(O)[CH](CC1=C(F)C(F)=C(F)C(F)=C1F)N%10    | 9.6_9 |
| C%11(COC1=CC=CC2=CC(Br)=CC=C21)=O.CSCC[CH](C%10=O)N%11.O=C(O)CN%10                                       | 9.7_1 |
| C%11(COC1=CC=CC2=CC(Br)=CC=C21)=O.CSCC[CH](C%10=O)N%11.CC(C)[CH](C(O)=O)N%10                             | 9.7_2 |
| C%11(COC1=CC=CC2=CC(Br)=CC=C21)=O.CSCC[CH](C%10=O)N%11.CC(C)C[CH](C(O)=O)N%10                            | 9.7_3 |
| C%11(COC1=CC=CC2=CC(Br)=CC=C21)=O.CSCC[CH](C%10=O)N%11.C[CH](C(O)=O)N%10                                 | 9.7_4 |
| C%11(COC1=CC=CC2=CC(Br)=CC=C21)=O.CSCC[CH](C%10=O)N%11.O=C(O)[CH](CC1=CC=CC=C1)N%10                      | 9.7_5 |
| C%11(COC1=CC=CC2=CC(Br)=CC=C21)=O.CSCC[CH](C%10=O)N%11.CC[CH](C)[CH](C(O)=O)N%10                         | 9.7_6 |
| C%11(COC1=CC=CC2=CC(Br)=CC=C21)=O.CSCC[CH](C%10=O)N%11.CSCC[CH](C(O)=O)N%10                              | 9.7_7 |
| C%11(COC1=CC=CC2=CC(Br)=CC=C21)=O.CSCC[CH](C%10=O)N%11.OC(C=C1)=CC=C1C[CH](C(O)=O)N%10                   | 9.7_8 |
| C%11(COC1=CC=CC2=CC(Br)=CC=C21)=O.CSCC[CH](C%10=O)N%11.O=C(O)[CH](CC1=C(F)C(F)=C(F)C(F)=C1F)N%10         | 9.7_9 |
| C%11(COC1=CC=CC2=CC(Br)=CC=C21)=O.OC(C=C1)=CC=C1C[CH](C%10=O)N%11.O=C(O)CN%10                            | 9.8_1 |
| C%11(COC1=CC=CC2=CC(Br)=CC=C21)=O.OC(C=C1)=CC=C1C[CH](C%10=O)N%11.CC(C)[C                                | 9.8_2 |

|                                                                                                             |        |
|-------------------------------------------------------------------------------------------------------------|--------|
| H](C(O)=O)N%10                                                                                              |        |
| C%11(COC1=CC=CC2=CC(Br)=CC=C21)=O.OC(C=C1)=CC=C1C[CH](C%10=O)N%11.CC(C)C[CH](C(O)=O)N%10                    | 9.8_3  |
| C%11(COC1=CC=CC2=CC(Br)=CC=C21)=O.OC(C=C1)=CC=C1C[CH](C%10=O)N%11.C[CH](C(O)=O)N%10                         | 9.8_4  |
| C%11(COC1=CC=CC2=CC(Br)=CC=C21)=O.OC(C=C1)=CC=C1C[CH](C%10=O)N%11.O=C(O)[CH](CC1=CC=CC=C1)N%10              | 9.8_5  |
| C%11(COC1=CC=CC2=CC(Br)=CC=C21)=O.OC(C=C1)=CC=C1C[CH](C%10=O)N%11.CC[CH](C)[CH](C(O)=O)N%10                 | 9.8_6  |
| C%11(COC1=CC=CC2=CC(Br)=CC=C21)=O.OC(C=C1)=CC=C1C[CH](C%10=O)N%11.CSCC[CH](C(O)=O)N%10                      | 9.8_7  |
| C%11(COC1=CC=CC2=CC(Br)=CC=C21)=O.OC(C=C1)=CC=C1C[CH](C%10=O)N%11.OC(C=C1)=CC=C1C[CH](C(O)=O)N%10           | 9.8_8  |
| C%11(COC1=CC=CC2=CC(Br)=CC=C21)=O.OC(C=C1)=CC=C1C[CH](C%10=O)N%11.O=C(O)[CH](CC1=C(F)C(F)=C(F)C(F)=C1F)N%10 | 9.8_9  |
| C%10(COC1=CC=CC2=CC(Br)=CC=C21)=O.O=C(O)CN%10                                                               | 9.9_1  |
| C%10(COC1=CC=CC2=CC(Br)=CC=C21)=O.CC(C)[CH](C(O)=O)N%10                                                     | 9.9_2  |
| C%10(COC1=CC=CC2=CC(Br)=CC=C21)=O.CC(C)C[CH](C(O)=O)N%10                                                    | 9.9_3  |
| C%10(COC1=CC=CC2=CC(Br)=CC=C21)=O.C[CH](C(O)=O)N%10                                                         | 9.9_4  |
| C%10(COC1=CC=CC2=CC(Br)=CC=C21)=O.O=C(O)[CH](CC1=CC=CC=C1)N%10                                              | 9.9_5  |
| C%10(COC1=CC=CC2=CC(Br)=CC=C21)=O.CC[CH](C)[CH](C(O)=O)N%10                                                 | 9.9_6  |
| C%10(COC1=CC=CC2=CC(Br)=CC=C21)=O.CSCC[CH](C(O)=O)N%10                                                      | 9.9_7  |
| C%10(COC1=CC=CC2=CC(Br)=CC=C21)=O.OC(C=C1)=CC=C1C[CH](C(O)=O)N%10                                           | 9.9_8  |
| C%10(COC1=CC=CC2=CC(Br)=CC=C21)=O.O=C(O)[CH](CC1=C(F)C(F)=C(F)C(F)=C1F)N%10                                 | 9.9_9  |
| C%11(COC1=CC=CC2=CC=CC=C21)=O.O=C%10CN%11.O=C(O)CN%10                                                       | 10.1_1 |
| C%11(COC1=CC=CC2=CC=CC=C21)=O.O=C%10CN%11.CC(C)[CH](C(O)=O)N%10                                             | 10.1_2 |
| C%11(COC1=CC=CC2=CC=CC=C21)=O.O=C%10CN%11.CC(C)C[CH](C(O)=O)N%10                                            | 10.1_3 |
| C%11(COC1=CC=CC2=CC=CC=C21)=O.O=C%10CN%11.C[CH](C(O)=O)N%10                                                 | 10.1_4 |
| C%11(COC1=CC=CC2=CC=CC=C21)=O.O=C%10CN%11.O=C(O)[CH](CC1=CC=CC=C1)N%10                                      | 10.1_5 |
| C%11(COC1=CC=CC2=CC=CC=C21)=O.O=C%10CN%11.CC[CH](C)[CH](C(O)=O)N%10                                         | 10.1_6 |
| C%11(COC1=CC=CC2=CC=CC=C21)=O.O=C%10CN%11.CSCC[CH](C(O)=O)N%10                                              | 10.1_7 |
| C%11(COC1=CC=CC2=CC=CC=C21)=O.O=C%10CN%11.OC(C=C1)=CC=C1C[CH](C(O)=O)N%10                                   | 10.1_8 |
| C%11(COC1=CC=CC2=CC=CC=C21)=O.O=C%10CN%11.O=C(O)[CH](CC1=C(F)C(F)=C(F)C(F)=C1F)N%10                         | 10.1_9 |
| C%11(COC1=CC=CC2=CC=CC=C21)=O.CC(C)[CH](C%10=O)N%11.O=C(O)CN%10                                             | 10.2_1 |
| C%11(COC1=CC=CC2=CC=CC=C21)=O.CC(C)[CH](C%10=O)N%11.CC(C)[CH](C(O)=O)N%10                                   | 10.2_2 |
| C%11(COC1=CC=CC2=CC=CC=C21)=O.CC(C)[CH](C%10=O)N%11.CC(C)C[CH](C(O)=O)N%10                                  | 10.2_3 |
| C%11(COC1=CC=CC2=CC=CC=C21)=O.CC(C)[CH](C%10=O)N%11.C[CH](C(O)=O)N%10                                       | 10.2_4 |
| C%11(COC1=CC=CC2=CC=CC=C21)=O.CC(C)[CH](C%10=O)N%11.O=C(O)[CH](CC1=CC=CC=C1)N%10                            | 10.2_5 |
| C%11(COC1=CC=CC2=CC=CC=C21)=O.CC(C)[CH](C%10=O)N%11.CC[CH](C)[CH](C(O)=O)N%10                               | 10.2_6 |
| C%11(COC1=CC=CC2=CC=CC=C21)=O.CC(C)[CH](C%10=O)N%11.CSCC[CH](C(O)=O)N%10                                    | 10.2_7 |
| C%11(COC1=CC=CC2=CC=CC=C21)=O.CC(C)[CH](C%10=O)N%11.OC(C=C1)=CC=C1C[CH](C(O)=O)N%10                         | 10.2_8 |



|                                                                                                      |        |
|------------------------------------------------------------------------------------------------------|--------|
| C%11(COC1=CC=CC2=CC=CC=C21)=O.CC(C)[CH](C%10=O)N%11.O=C(O)[CH](CC1=C(F)C(F)=C(F)C(F)=C1F)N%10        | 10.2_9 |
| C%11(COC1=CC=CC2=CC=CC=C21)=O.CC(C)C[CH](C%10=O)N%11.O=C(O)CN%10                                     | 10.3_1 |
| C%11(COC1=CC=CC2=CC=CC=C21)=O.CC(C)C[CH](C%10=O)N%11.CC(C)[CH](C(O)=O)N%10                           | 10.3_2 |
| C%11(COC1=CC=CC2=CC=CC=C21)=O.CC(C)C[CH](C%10=O)N%11.CC(C)C[CH](C(O)=O)N%10                          | 10.3_3 |
| C%11(COC1=CC=CC2=CC=CC=C21)=O.CC(C)C[CH](C%10=O)N%11.C[CH](C(O)=O)N%10                               | 10.3_4 |
| C%11(COC1=CC=CC2=CC=CC=C21)=O.CC(C)C[CH](C%10=O)N%11.O=C(O)[CH](CC1=CC=C(C=C1)N%10                   | 10.3_5 |
| C%11(COC1=CC=CC2=CC=CC=C21)=O.CC(C)C[CH](C%10=O)N%11.CC[CH](C)[CH](C(O)=O)N%10                       | 10.3_6 |
| C%11(COC1=CC=CC2=CC=CC=C21)=O.CC(C)C[CH](C%10=O)N%11.CSCC[CH](C(O)=O)N%10                            | 10.3_7 |
| C%11(COC1=CC=CC2=CC=CC=C21)=O.CC(C)C[CH](C%10=O)N%11.OC(C=C1)=CC=C1C[CH](C(O)=O)N%10                 | 10.3_8 |
| C%11(COC1=CC=CC2=CC=CC=C21)=O.CC(C)C[CH](C%10=O)N%11.O=C(O)[CH](CC1=C(F)C(F)=C(F)C(F)=C1F)N%10       | 10.3_9 |
| C%11(COC1=CC=CC2=CC=CC=C21)=O.C[CH](C%10=O)N%11.O=C(O)CN%10                                          | 10.4_1 |
| C%11(COC1=CC=CC2=CC=CC=C21)=O.C[CH](C%10=O)N%11.CC(C)[CH](C(O)=O)N%10                                | 10.4_2 |
| C%11(COC1=CC=CC2=CC=CC=C21)=O.C[CH](C%10=O)N%11.CC(C)C[CH](C(O)=O)N%10                               | 10.4_3 |
| C%11(COC1=CC=CC2=CC=CC=C21)=O.C[CH](C%10=O)N%11.C[CH](C(O)=O)N%10                                    | 10.4_4 |
| C%11(COC1=CC=CC2=CC=CC=C21)=O.C[CH](C%10=O)N%11.O=C(O)[CH](CC1=CC=CC=C1)N%10                         | 10.4_5 |
| C%11(COC1=CC=CC2=CC=CC=C21)=O.C[CH](C%10=O)N%11.CC[CH](C)[CH](C(O)=O)N%10                            | 10.4_6 |
| C%11(COC1=CC=CC2=CC=CC=C21)=O.C[CH](C%10=O)N%11.CSCC[CH](C(O)=O)N%10                                 | 10.4_7 |
| C%11(COC1=CC=CC2=CC=CC=C21)=O.C[CH](C%10=O)N%11.OC(C=C1)=CC=C1C[CH](C(O)=O)N%10                      | 10.4_8 |
| C%11(COC1=CC=CC2=CC=CC=C21)=O.C[CH](C%10=O)N%11.O=C(O)[CH](CC1=C(F)C(F)=C(F)C(F)=C1F)N%10            | 10.4_9 |
| C%11(COC1=CC=CC2=CC=CC=C21)=O.O=C%10[CH](CC1=CC=CC=C1)N%11.O=C(O)CN%10                               | 10.5_1 |
| C%11(COC1=CC=CC2=CC=CC=C21)=O.O=C%10[CH](CC1=CC=CC=C1)N%11.CC(C)[CH](C(O)=O)N%10                     | 10.5_2 |
| C%11(COC1=CC=CC2=CC=CC=C21)=O.O=C%10[CH](CC1=CC=CC=C1)N%11.CC(C)C[CH](C(O)=O)N%10                    | 10.5_3 |
| C%11(COC1=CC=CC2=CC=CC=C21)=O.O=C%10[CH](CC1=CC=CC=C1)N%11.C[CH](C(O)=O)N%10                         | 10.5_4 |
| C%11(COC1=CC=CC2=CC=CC=C21)=O.O=C%10[CH](CC1=CC=CC=C1)N%11.O=C(O)[CH](CC1=CC=CC=C1)N%10              | 10.5_5 |
| C%11(COC1=CC=CC2=CC=CC=C21)=O.O=C%10[CH](CC1=CC=CC=C1)N%11.CC[CH](C)[CH](C(O)=O)N%10                 | 10.5_6 |
| C%11(COC1=CC=CC2=CC=CC=C21)=O.O=C%10[CH](CC1=CC=CC=C1)N%11.CSCC[CH](C(O)=O)N%10                      | 10.5_7 |
| C%11(COC1=CC=CC2=CC=CC=C21)=O.O=C%10[CH](CC1=CC=CC=C1)N%11.OC(C=C1)=CC=C1C[CH](C(O)=O)N%10           | 10.5_8 |
| C%11(COC1=CC=CC2=CC=CC=C21)=O.O=C%10[CH](CC1=CC=CC=C1)N%11.O=C(O)[CH](CC1=C(F)C(F)=C(F)C(F)=C1F)N%10 | 10.5_9 |
| C%11(COC1=CC=CC2=CC=CC=C21)=O.CC[CH](C)[CH](C%10=O)N%11.O=C(O)CN%10                                  | 10.6_1 |

|                                                                                                         |        |
|---------------------------------------------------------------------------------------------------------|--------|
| C%11(COC1=CC=CC2=CC=CC=C21)=O.CC[CH](C)[CH](C%10=O)N%11.CC(C)[CH](C(O)=O)N%10                           | 10.6_2 |
| C%11(COC1=CC=CC2=CC=CC=C21)=O.CC[CH](C)[CH](C%10=O)N%11.CC(C)C[CH](C(O)=O)N%10                          | 10.6_3 |
| C%11(COC1=CC=CC2=CC=CC=C21)=O.CC[CH](C)[CH](C%10=O)N%11.C[CH](C(O)=O)N%10                               | 10.6_4 |
| C%11(COC1=CC=CC2=CC=CC=C21)=O.CC[CH](C)[CH](C%10=O)N%11.O=C(O)[CH](CC1=CC=CC=C1)N%10                    | 10.6_5 |
| C%11(COC1=CC=CC2=CC=CC=C21)=O.CC[CH](C)[CH](C%10=O)N%11.CC[CH](C)[CH](C(O)=O)N%10                       | 10.6_6 |
| C%11(COC1=CC=CC2=CC=CC=C21)=O.CC[CH](C)[CH](C%10=O)N%11.CSCC[CH](C(O)=O)N%10                            | 10.6_7 |
| C%11(COC1=CC=CC2=CC=CC=C21)=O.CC[CH](C)[CH](C%10=O)N%11.OC(C=C1)=CC=C1C[CH](C(O)=O)N%10                 | 10.6_8 |
| C%11(COC1=CC=CC2=CC=CC=C21)=O.CC[CH](C)[CH](C%10=O)N%11.O=C(O)[CH](CC1=C(F)C(F)=C(F)C(F)=C1F)N%10       | 10.6_9 |
| C%11(COC1=CC=CC2=CC=CC=C21)=O.CSCC[CH](C%10=O)N%11.O=C(O)CN%10                                          | 10.7_1 |
| C%11(COC1=CC=CC2=CC=CC=C21)=O.CSCC[CH](C%10=O)N%11.CC(C)[CH](C(O)=O)N%10                                | 10.7_2 |
| C%11(COC1=CC=CC2=CC=CC=C21)=O.CSCC[CH](C%10=O)N%11.CC(C)C[CH](C(O)=O)N%10                               | 10.7_3 |
| C%11(COC1=CC=CC2=CC=CC=C21)=O.CSCC[CH](C%10=O)N%11.C[CH](C(O)=O)N%10                                    | 10.7_4 |
| C%11(COC1=CC=CC2=CC=CC=C21)=O.CSCC[CH](C%10=O)N%11.O=C(O)[CH](CC1=CC=CC=C1)N%10                         | 10.7_5 |
| C%11(COC1=CC=CC2=CC=CC=C21)=O.CSCC[CH](C%10=O)N%11.CC[CH](C)[CH](C(O)=O)N%10                            | 10.7_6 |
| C%11(COC1=CC=CC2=CC=CC=C21)=O.CSCC[CH](C%10=O)N%11.CSCC[CH](C(O)=O)N%10                                 | 10.7_7 |
| C%11(COC1=CC=CC2=CC=CC=C21)=O.CSCC[CH](C%10=O)N%11.OC(C=C1)=CC=C1C[CH](C(O)=O)N%10                      | 10.7_8 |
| C%11(COC1=CC=CC2=CC=CC=C21)=O.CSCC[CH](C%10=O)N%11.O=C(O)[CH](CC1=C(F)C(F)=C(F)C(F)=C1F)N%10            | 10.7_9 |
| C%11(COC1=CC=CC2=CC=CC=C21)=O.OC(C=C1)=CC=C1C[CH](C%10=O)N%11.O=C(O)CN%10                               | 10.8_1 |
| C%11(COC1=CC=CC2=CC=CC=C21)=O.OC(C=C1)=CC=C1C[CH](C%10=O)N%11.CC(C)[CH](C(O)=O)N%10                     | 10.8_2 |
| C%11(COC1=CC=CC2=CC=CC=C21)=O.OC(C=C1)=CC=C1C[CH](C%10=O)N%11.CC(C)C[CH](C(O)=O)N%10                    | 10.8_3 |
| C%11(COC1=CC=CC2=CC=CC=C21)=O.OC(C=C1)=CC=C1C[CH](C%10=O)N%11.C[CH](C(O)=O)N%10                         | 10.8_4 |
| C%11(COC1=CC=CC2=CC=CC=C21)=O.OC(C=C1)=CC=C1C[CH](C%10=O)N%11.O=C(O)[CH](CC1=CC=CC=C1)N%10              | 10.8_5 |
| C%11(COC1=CC=CC2=CC=CC=C21)=O.OC(C=C1)=CC=C1C[CH](C%10=O)N%11.CC[CH](C)[CH](C(O)=O)N%10                 | 10.8_6 |
| C%11(COC1=CC=CC2=CC=CC=C21)=O.OC(C=C1)=CC=C1C[CH](C%10=O)N%11.CSCC[CH](C(O)=O)N%10                      | 10.8_7 |
| C%11(COC1=CC=CC2=CC=CC=C21)=O.OC(C=C1)=CC=C1C[CH](C%10=O)N%11.OC(C=C1)=CC=C1C[CH](C(O)=O)N%10           | 10.8_8 |
| C%11(COC1=CC=CC2=CC=CC=C21)=O.OC(C=C1)=CC=C1C[CH](C%10=O)N%11.O=C(O)[CH](CC1=C(F)C(F)=C(F)C(F)=C1F)N%10 | 10.8_9 |
| C%10(COC1=CC=CC2=CC=CC=C21)=O.O=C(O)CN%10                                                               | 10.9_1 |

|                                                                                                    |        |
|----------------------------------------------------------------------------------------------------|--------|
| C%10(COC1=CC=CC2=CC=CC=C21)=O.CC(C)[CH](C(O)=O)N%10                                                | 10.9_2 |
| C%10(COC1=CC=CC2=CC=CC=C21)=O.CC(C)C[CH](C(O)=O)N%10                                               | 10.9_3 |
| C%10(COC1=CC=CC2=CC=CC=C21)=O.C[CH](C(O)=O)N%10                                                    | 10.9_4 |
| C%10(COC1=CC=CC2=CC=CC=C21)=O.O=C(O)[CH](CC1=CC=CC=C1)N%10                                         | 10.9_5 |
| C%10(COC1=CC=CC2=CC=CC=C21)=O.CC[CH](C)[CH](C(O)=O)N%10                                            | 10.9_6 |
| C%10(COC1=CC=CC2=CC=CC=C21)=O.CSCC[CH](C(O)=O)N%10                                                 | 10.9_7 |
| C%10(COC1=CC=CC2=CC=CC=C21)=O.OC(C=C1)=CC=C1C[CH](C(O)=O)N%10                                      | 10.9_8 |
| C%10(COC1=CC=CC2=CC=CC=C21)=O.O=C(O)[CH](CC1=C(F)C(F)=C(F)C(F)=C1F)N%10                            | 10.9_9 |
| C%11(COC1=CC=CC2=CC(C#N)=CC=C21)=O.O=C%10CN%11.O=C(O)CN%10                                         | 11.1_1 |
| C%11(COC1=CC=CC2=CC(C#N)=CC=C21)=O.O=C%10CN%11.CC(C)[CH](C(O)=O)N%10                               | 11.1_2 |
| C%11(COC1=CC=CC2=CC(C#N)=CC=C21)=O.O=C%10CN%11.CC(C)C[CH](C(O)=O)N%10                              | 11.1_3 |
| C%11(COC1=CC=CC2=CC(C#N)=CC=C21)=O.O=C%10CN%11.C[CH](C(O)=O)N%10                                   | 11.1_4 |
| C%11(COC1=CC=CC2=CC(C#N)=CC=C21)=O.O=C%10CN%11.O=C(O)[CH](CC1=CC=CC=C1)N%10                        | 11.1_5 |
| C%11(COC1=CC=CC2=CC(C#N)=CC=C21)=O.O=C%10CN%11.CC[CH](C)[CH](C(O)=O)N%10                           | 11.1_6 |
| C%11(COC1=CC=CC2=CC(C#N)=CC=C21)=O.O=C%10CN%11.CSCC[CH](C(O)=O)N%10                                | 11.1_7 |
| C%11(COC1=CC=CC2=CC(C#N)=CC=C21)=O.O=C%10CN%11.OC(C=C1)=CC=C1C[CH](C(O)=O)N%10                     | 11.1_8 |
| C%11(COC1=CC=CC2=CC(C#N)=CC=C21)=O.O=C%10CN%11.O=C(O)[CH](CC1=C(F)C(F)=C(F)C(F)=C1F)N%10           | 11.1_9 |
| C%11(COC1=CC=CC2=CC(C#N)=CC=C21)=O.CC(C)[CH](C%10=O)N%11.O=C(O)CN%10                               | 11.2_1 |
| C%11(COC1=CC=CC2=CC(C#N)=CC=C21)=O.CC(C)[CH](C%10=O)N%11.CC(C)[CH](C(O)=O)N%10                     | 11.2_2 |
| C%11(COC1=CC=CC2=CC(C#N)=CC=C21)=O.CC(C)[CH](C%10=O)N%11.CC(C)C[CH](C(O)=O)N%10                    | 11.2_3 |
| C%11(COC1=CC=CC2=CC(C#N)=CC=C21)=O.CC(C)[CH](C%10=O)N%11.C[CH](C(O)=O)N%10                         | 11.2_4 |
| C%11(COC1=CC=CC2=CC(C#N)=CC=C21)=O.CC(C)[CH](C%10=O)N%11.O=C(O)[CH](CC1=CC=CC=C1)N%10              | 11.2_5 |
| C%11(COC1=CC=CC2=CC(C#N)=CC=C21)=O.CC(C)[CH](C%10=O)N%11.CC[CH](C)[CH](C(O)=O)N%10                 | 11.2_6 |
| C%11(COC1=CC=CC2=CC(C#N)=CC=C21)=O.CC(C)[CH](C%10=O)N%11.CSCC[CH](C(O)=O)N%10                      | 11.2_7 |
| C%11(COC1=CC=CC2=CC(C#N)=CC=C21)=O.CC(C)[CH](C%10=O)N%11.OC(C=C1)=CC=C1C[CH](C(O)=O)N%10           | 11.2_8 |
| C%11(COC1=CC=CC2=CC(C#N)=CC=C21)=O.CC(C)[CH](C%10=O)N%11.O=C(O)[CH](CC1=C(F)C(F)=C(F)C(F)=C1F)N%10 | 11.2_9 |
| C%11(COC1=CC=CC2=CC(C#N)=CC=C21)=O.CC(C)C[CH](C%10=O)N%11.O=C(O)CN%10                              | 11.3_1 |
| C%11(COC1=CC=CC2=CC(C#N)=CC=C21)=O.CC(C)C[CH](C%10=O)N%11.CC(C)[CH](C(O)=O)N%10                    | 11.3_2 |
| C%11(COC1=CC=CC2=CC(C#N)=CC=C21)=O.CC(C)C[CH](C%10=O)N%11.CC(C)C[CH](C(O)=O)N%10                   | 11.3_3 |
| C%11(COC1=CC=CC2=CC(C#N)=CC=C21)=O.CC(C)C[CH](C%10=O)N%11.C[CH](C(O)=O)N%10                        | 11.3_4 |
| C%11(COC1=CC=CC2=CC(C#N)=CC=C21)=O.CC(C)C[CH](C%10=O)N%11.O=C(O)[CH](CC1=CC=CC=C1)N%10             | 11.3_5 |
| C%11(COC1=CC=CC2=CC(C#N)=CC=C21)=O.CC(C)C[CH](C%10=O)N%11.CC[CH](C)[CH](C(                         | 11.3_6 |

|                                                                                                           |        |
|-----------------------------------------------------------------------------------------------------------|--------|
| O)=O)N%10                                                                                                 |        |
| C%11(COC1=CC=CC2=CC(C#N)=CC=C21)=O.CC(C)C[CH](C%10=O)N%11.CSCC[CH](C(O)=O)N%10                            | 11.3_7 |
| C%11(COC1=CC=CC2=CC(C#N)=CC=C21)=O.CC(C)C[CH](C%10=O)N%11.OC(C=C1)=CC=C1C[CH](C(O)=O)N%10                 | 11.3_8 |
| C%11(COC1=CC=CC2=CC(C#N)=CC=C21)=O.CC(C)C[CH](C%10=O)N%11.O=C(O)[CH](CC1=C(F)C(F)=C(F)C(F)=C1F)N%10       | 11.3_9 |
| C%11(COC1=CC=CC2=CC(C#N)=CC=C21)=O.C[CH](C%10=O)N%11.O=C(O)CN%10                                          | 11.4_1 |
| C%11(COC1=CC=CC2=CC(C#N)=CC=C21)=O.C[CH](C%10=O)N%11.CC(C)[CH](C(O)=O)N%10                                | 11.4_2 |
| C%11(COC1=CC=CC2=CC(C#N)=CC=C21)=O.C[CH](C%10=O)N%11.CC(C)C[CH](C(O)=O)N%10                               | 11.4_3 |
| C%11(COC1=CC=CC2=CC(C#N)=CC=C21)=O.C[CH](C%10=O)N%11.C[CH](C(O)=O)N%10                                    | 11.4_4 |
| C%11(COC1=CC=CC2=CC(C#N)=CC=C21)=O.C[CH](C%10=O)N%11.O=C(O)[CH](CC1=CC=C(C=C1)N%10                        | 11.4_5 |
| C%11(COC1=CC=CC2=CC(C#N)=CC=C21)=O.C[CH](C%10=O)N%11.CC[CH](C)[CH](C(O)=O)N%10                            | 11.4_6 |
| C%11(COC1=CC=CC2=CC(C#N)=CC=C21)=O.C[CH](C%10=O)N%11.CSCC[CH](C(O)=O)N%10                                 | 11.4_7 |
| C%11(COC1=CC=CC2=CC(C#N)=CC=C21)=O.C[CH](C%10=O)N%11.OC(C=C1)=CC=C1C[CH](C(O)=O)N%10                      | 11.4_8 |
| C%11(COC1=CC=CC2=CC(C#N)=CC=C21)=O.C[CH](C%10=O)N%11.O=C(O)[CH](CC1=C(F)C(F)=C(F)C(F)=C1F)N%10            | 11.4_9 |
| C%11(COC1=CC=CC2=CC(C#N)=CC=C21)=O.O=C%10[CH](CC1=CC=CC=C1)N%11.O=C(O)CN%10                               | 11.5_1 |
| C%11(COC1=CC=CC2=CC(C#N)=CC=C21)=O.O=C%10[CH](CC1=CC=CC=C1)N%11.CC(C)[CH](C(O)=O)N%10                     | 11.5_2 |
| C%11(COC1=CC=CC2=CC(C#N)=CC=C21)=O.O=C%10[CH](CC1=CC=CC=C1)N%11.CC(C)C[CH](C(O)=O)N%10                    | 11.5_3 |
| C%11(COC1=CC=CC2=CC(C#N)=CC=C21)=O.O=C%10[CH](CC1=CC=CC=C1)N%11.C[CH](C(O)=O)N%10                         | 11.5_4 |
| C%11(COC1=CC=CC2=CC(C#N)=CC=C21)=O.O=C%10[CH](CC1=CC=CC=C1)N%11.O=C(O)[CH](CC1=CC=CC=C1)N%10              | 11.5_5 |
| C%11(COC1=CC=CC2=CC(C#N)=CC=C21)=O.O=C%10[CH](CC1=CC=CC=C1)N%11.CC[CH](C)[CH](C(O)=O)N%10                 | 11.5_6 |
| C%11(COC1=CC=CC2=CC(C#N)=CC=C21)=O.O=C%10[CH](CC1=CC=CC=C1)N%11.CSCC[CH](C(O)=O)N%10                      | 11.5_7 |
| C%11(COC1=CC=CC2=CC(C#N)=CC=C21)=O.O=C%10[CH](CC1=CC=CC=C1)N%11.OC(C=C1)=CC=C1C[CH](C(O)=O)N%10           | 11.5_8 |
| C%11(COC1=CC=CC2=CC(C#N)=CC=C21)=O.O=C%10[CH](CC1=CC=CC=C1)N%11.O=C(O)[CH](CC1=C(F)C(F)=C(F)C(F)=C1F)N%10 | 11.5_9 |
| C%11(COC1=CC=CC2=CC(C#N)=CC=C21)=O.CC[CH](C)[CH](C%10=O)N%11.O=C(O)CN%10                                  | 11.6_1 |
| C%11(COC1=CC=CC2=CC(C#N)=CC=C21)=O.CC[CH](C)[CH](C%10=O)N%11.CC(C)[CH](C(O)=O)N%10                        | 11.6_2 |
| C%11(COC1=CC=CC2=CC(C#N)=CC=C21)=O.CC[CH](C)[CH](C%10=O)N%11.CC(C)C[CH](C(O)=O)N%10                       | 11.6_3 |
| C%11(COC1=CC=CC2=CC(C#N)=CC=C21)=O.CC[CH](C)[CH](C%10=O)N%11.C[CH](C(O)=O)N%10                            | 11.6_4 |
| C%11(COC1=CC=CC2=CC(C#N)=CC=C21)=O.CC[CH](C)[CH](C%10=O)N%11.O=C(O)[CH](CC                                | 11.6_5 |

|                                                                                                              |        |
|--------------------------------------------------------------------------------------------------------------|--------|
| 1=CC=CC=C1)N%10                                                                                              |        |
| C%11(COC1=CC=CC2=CC(C#N)=CC=C21)=O.CC[CH](C)[CH](C%10=O)N%11.CC[CH](C)[CH](C(O)=O)N%10                       | 11.6_6 |
| C%11(COC1=CC=CC2=CC(C#N)=CC=C21)=O.CC[CH](C)[CH](C%10=O)N%11.CSCC[CH](C(O)=O)N%10                            | 11.6_7 |
| C%11(COC1=CC=CC2=CC(C#N)=CC=C21)=O.CC[CH](C)[CH](C%10=O)N%11.OC(C=C1)=CC=C1C[CH](C(O)=O)N%10                 | 11.6_8 |
| C%11(COC1=CC=CC2=CC(C#N)=CC=C21)=O.CC[CH](C)[CH](C%10=O)N%11.O=C(O)[CH](CC1=C(F)C(F)=C(F)C(F)=C1F)N%10       | 11.6_9 |
| C%11(COC1=CC=CC2=CC(C#N)=CC=C21)=O.CSCC[CH](C%10=O)N%11.O=C(O)CN%10                                          | 11.7_1 |
| C%11(COC1=CC=CC2=CC(C#N)=CC=C21)=O.CSCC[CH](C%10=O)N%11.CC(C)[CH](C(O)=O)N%10                                | 11.7_2 |
| C%11(COC1=CC=CC2=CC(C#N)=CC=C21)=O.CSCC[CH](C%10=O)N%11.CC(C)C[CH](C(O)=O)N%10                               | 11.7_3 |
| C%11(COC1=CC=CC2=CC(C#N)=CC=C21)=O.CSCC[CH](C%10=O)N%11.C[CH](C(O)=O)N%10                                    | 11.7_4 |
| C%11(COC1=CC=CC2=CC(C#N)=CC=C21)=O.CSCC[CH](C%10=O)N%11.O=C(O)[CH](CC1=CC=C1)N%10                            | 11.7_5 |
| C%11(COC1=CC=CC2=CC(C#N)=CC=C21)=O.CSCC[CH](C%10=O)N%11.CC[CH](C)[CH](C(O)=O)N%10                            | 11.7_6 |
| C%11(COC1=CC=CC2=CC(C#N)=CC=C21)=O.CSCC[CH](C%10=O)N%11.CSCC[CH](C(O)=O)N%10                                 | 11.7_7 |
| C%11(COC1=CC=CC2=CC(C#N)=CC=C21)=O.CSCC[CH](C%10=O)N%11.OC(C=C1)=CC=C1C[CH](C(O)=O)N%10                      | 11.7_8 |
| C%11(COC1=CC=CC2=CC(C#N)=CC=C21)=O.CSCC[CH](C%10=O)N%11.O=C(O)[CH](CC1=C(F)C(F)=C(F)C(F)=C1F)N%10            | 11.7_9 |
| C%11(COC1=CC=CC2=CC(C#N)=CC=C21)=O.OC(C=C1)=CC=C1C[CH](C%10=O)N%11.O=C(O)CN%10                               | 11.8_1 |
| C%11(COC1=CC=CC2=CC(C#N)=CC=C21)=O.OC(C=C1)=CC=C1C[CH](C%10=O)N%11.CC(C)[CH](C(O)=O)N%10                     | 11.8_2 |
| C%11(COC1=CC=CC2=CC(C#N)=CC=C21)=O.OC(C=C1)=CC=C1C[CH](C%10=O)N%11.CC(C)C[CH](C(O)=O)N%10                    | 11.8_3 |
| C%11(COC1=CC=CC2=CC(C#N)=CC=C21)=O.OC(C=C1)=CC=C1C[CH](C%10=O)N%11.C[CH](C(O)=O)N%10                         | 11.8_4 |
| C%11(COC1=CC=CC2=CC(C#N)=CC=C21)=O.OC(C=C1)=CC=C1C[CH](C%10=O)N%11.O=C(O)[CH](CC1=CC=CC=C1)N%10              | 11.8_5 |
| C%11(COC1=CC=CC2=CC(C#N)=CC=C21)=O.OC(C=C1)=CC=C1C[CH](C%10=O)N%11.CC[CH](C)[CH](C(O)=O)N%10                 | 11.8_6 |
| C%11(COC1=CC=CC2=CC(C#N)=CC=C21)=O.OC(C=C1)=CC=C1C[CH](C%10=O)N%11.CSCC[CH](C(O)=O)N%10                      | 11.8_7 |
| C%11(COC1=CC=CC2=CC(C#N)=CC=C21)=O.OC(C=C1)=CC=C1C[CH](C%10=O)N%11.OC(C=C1)=CC=C1C[CH](C(O)=O)N%10           | 11.8_8 |
| C%11(COC1=CC=CC2=CC(C#N)=CC=C21)=O.OC(C=C1)=CC=C1C[CH](C%10=O)N%11.O=C(O)[CH](CC1=C(F)C(F)=C(F)C(F)=C1F)N%10 | 11.8_9 |
| C%10(COC1=CC=CC2=CC(C#N)=CC=C21)=O.O=C(O)CN%10                                                               | 11.9_1 |
| C%10(COC1=CC=CC2=CC(C#N)=CC=C21)=O.CC(C)[CH](C(O)=O)N%10                                                     | 11.9_2 |
| C%10(COC1=CC=CC2=CC(C#N)=CC=C21)=O.CC(C)C[CH](C(O)=O)N%10                                                    | 11.9_3 |
| C%10(COC1=CC=CC2=CC(C#N)=CC=C21)=O.C[CH](C(O)=O)N%10                                                         | 11.9_4 |

|                                                                                                 |        |
|-------------------------------------------------------------------------------------------------|--------|
| C%10(COC1=CC=CC2=CC(C#N)=CC=C21)=O.O=C(O)[CH](CC1=CC=CC=C1)N%10                                 | 11.9_5 |
| C%10(COC1=CC=CC2=CC(C#N)=CC=C21)=O.CC[CH](C)[CH](C(O)=O)N%10                                    | 11.9_6 |
| C%10(COC1=CC=CC2=CC(C#N)=CC=C21)=O.CSCC[CH](C(O)=O)N%10                                         | 11.9_7 |
| C%10(COC1=CC=CC2=CC(C#N)=CC=C21)=O.OC(C=C1)=CC=C1C[CH](C(O)=O)N%10                              | 11.9_8 |
| C%10(COC1=CC=CC2=CC(C#N)=CC=C21)=O.O=C(O)[CH](CC1=C(F)C(F)=C(F)C(F)=C1F)N%10                    | 11.9_9 |
| C%11(COC1=CC2=CC=CC=C2C=C1OC)=O.O=C%10CN%11.O=C(O)CN%10                                         | 12.1_1 |
| C%11(COC1=CC2=CC=CC=C2C=C1OC)=O.O=C%10CN%11.CC(C)[CH](C(O)=O)N%10                               | 12.1_2 |
| C%11(COC1=CC2=CC=CC=C2C=C1OC)=O.O=C%10CN%11.CC(C)C[CH](C(O)=O)N%10                              | 12.1_3 |
| C%11(COC1=CC2=CC=CC=C2C=C1OC)=O.O=C%10CN%11.C[CH](C(O)=O)N%10                                   | 12.1_4 |
| C%11(COC1=CC2=CC=CC=C2C=C1OC)=O.O=C%10CN%11.O=C(O)[CH](CC1=CC=CC=C1)N%10                        | 12.1_5 |
| C%11(COC1=CC2=CC=CC=C2C=C1OC)=O.O=C%10CN%11.CC[CH](C)[CH](C(O)=O)N%10                           | 12.1_6 |
| C%11(COC1=CC2=CC=CC=C2C=C1OC)=O.O=C%10CN%11.CSCC[CH](C(O)=O)N%10                                | 12.1_7 |
| C%11(COC1=CC2=CC=CC=C2C=C1OC)=O.O=C%10CN%11.OC(C=C1)=CC=C1C[CH](C(O)=O)N%10                     | 12.1_8 |
| C%11(COC1=CC2=CC=CC=C2C=C1OC)=O.O=C%10CN%11.O=C(O)[CH](CC1=C(F)C(F)=C(F)C(F)=C1F)N%10           | 12.1_9 |
| C%11(COC1=CC2=CC=CC=C2C=C1OC)=O.CC(C)[CH](C%10=O)N%11.O=C(O)CN%10                               | 12.2_1 |
| C%11(COC1=CC2=CC=CC=C2C=C1OC)=O.CC(C)[CH](C%10=O)N%11.CC(C)[CH](C(O)=O)N%10                     | 12.2_2 |
| C%11(COC1=CC2=CC=CC=C2C=C1OC)=O.CC(C)[CH](C%10=O)N%11.CC(C)C[CH](C(O)=O)N%10                    | 12.2_3 |
| C%11(COC1=CC2=CC=CC=C2C=C1OC)=O.CC(C)[CH](C%10=O)N%11.C[CH](C(O)=O)N%10                         | 12.2_4 |
| C%11(COC1=CC2=CC=CC=C2C=C1OC)=O.CC(C)[CH](C%10=O)N%11.O=C(O)[CH](CC1=CC=CC=C1)N%10              | 12.2_5 |
| C%11(COC1=CC2=CC=CC=C2C=C1OC)=O.CC(C)[CH](C%10=O)N%11.CC[CH](C)[CH](C(O)=O)N%10                 | 12.2_6 |
| C%11(COC1=CC2=CC=CC=C2C=C1OC)=O.CC(C)[CH](C%10=O)N%11.CSCC[CH](C(O)=O)N%10                      | 12.2_7 |
| C%11(COC1=CC2=CC=CC=C2C=C1OC)=O.CC(C)[CH](C%10=O)N%11.OC(C=C1)=CC=C1C[CH](C(O)=O)N%10           | 12.2_8 |
| C%11(COC1=CC2=CC=CC=C2C=C1OC)=O.CC(C)[CH](C%10=O)N%11.O=C(O)[CH](CC1=C(F)C(F)=C(F)C(F)=C1F)N%10 | 12.2_9 |
| C%11(COC1=CC2=CC=CC=C2C=C1OC)=O.CC(C)C[CH](C%10=O)N%11.O=C(O)CN%10                              | 12.3_1 |
| C%11(COC1=CC2=CC=CC=C2C=C1OC)=O.CC(C)C[CH](C%10=O)N%11.CC(C)[CH](C(O)=O)N%10                    | 12.3_2 |
| C%11(COC1=CC2=CC=CC=C2C=C1OC)=O.CC(C)C[CH](C%10=O)N%11.CC(C)C[CH](C(O)=O)N%10                   | 12.3_3 |
| C%11(COC1=CC2=CC=CC=C2C=C1OC)=O.CC(C)C[CH](C%10=O)N%11.C[CH](C(O)=O)N%10                        | 12.3_4 |
| C%11(COC1=CC2=CC=CC=C2C=C1OC)=O.CC(C)C[CH](C%10=O)N%11.O=C(O)[CH](CC1=CC=CC=C1)N%10             | 12.3_5 |
| C%11(COC1=CC2=CC=CC=C2C=C1OC)=O.CC(C)C[CH](C%10=O)N%11.CC[CH](C)[CH](C(O)=O)N%10                | 12.3_6 |
| C%11(COC1=CC2=CC=CC=C2C=C1OC)=O.CC(C)C[CH](C%10=O)N%11.CSCC[CH](C(O)=O)N%10                     | 12.3_7 |
| C%11(COC1=CC2=CC=CC=C2C=C1OC)=O.CC(C)C[CH](C%10=O)N%11.OC(C=C1)=CC=C1C[CH](C(O)=O)N%10          | 12.3_8 |

|                                                                                                        |        |
|--------------------------------------------------------------------------------------------------------|--------|
| C%11(COC1=CC2=CC=CC=C2C=C1OC)=O.CC(C)C[CH](C%10=O)N%11.O=C(O)[CH](CC1=C(F)C(F)=C(F)C(F)=C1F)N%10       | 12.3_9 |
| C%11(COC1=CC2=CC=CC=C2C=C1OC)=O.C[CH](C%10=O)N%11.O=C(O)CN%10                                          | 12.4_1 |
| C%11(COC1=CC2=CC=CC=C2C=C1OC)=O.C[CH](C%10=O)N%11.CC(C)[CH](C(O)=O)N%10                                | 12.4_2 |
| C%11(COC1=CC2=CC=CC=C2C=C1OC)=O.C[CH](C%10=O)N%11.CC(C)C[CH](C(O)=O)N%10                               | 12.4_3 |
| C%11(COC1=CC2=CC=CC=C2C=C1OC)=O.C[CH](C%10=O)N%11.C[CH](C(O)=O)N%10                                    | 12.4_4 |
| C%11(COC1=CC2=CC=CC=C2C=C1OC)=O.C[CH](C%10=O)N%11.O=C(O)[CH](CC1=CC=CC=C1)N%10                         | 12.4_5 |
| C%11(COC1=CC2=CC=CC=C2C=C1OC)=O.C[CH](C%10=O)N%11.CC[CH](C)[CH](C(O)=O)N%10                            | 12.4_6 |
| C%11(COC1=CC2=CC=CC=C2C=C1OC)=O.C[CH](C%10=O)N%11.CSCC[CH](C(O)=O)N%10                                 | 12.4_7 |
| C%11(COC1=CC2=CC=CC=C2C=C1OC)=O.C[CH](C%10=O)N%11.OC(C=C1)=CC=C1C[CH](C(O)=O)N%10                      | 12.4_8 |
| C%11(COC1=CC2=CC=CC=C2C=C1OC)=O.C[CH](C%10=O)N%11.O=C(O)[CH](CC1=C(F)C(F)=C(F)C(F)=C1F)N%10            | 12.4_9 |
| C%11(COC1=CC2=CC=CC=C2C=C1OC)=O.O=C%10[CH](CC1=CC=CC=C1)N%11.O=C(O)CN%10                               | 12.5_1 |
| C%11(COC1=CC2=CC=CC=C2C=C1OC)=O.O=C%10[CH](CC1=CC=CC=C1)N%11.CC(C)[CH](C(O)=O)N%10                     | 12.5_2 |
| C%11(COC1=CC2=CC=CC=C2C=C1OC)=O.O=C%10[CH](CC1=CC=CC=C1)N%11.CC(C)C[CH](C(O)=O)N%10                    | 12.5_3 |
| C%11(COC1=CC2=CC=CC=C2C=C1OC)=O.O=C%10[CH](CC1=CC=CC=C1)N%11.C[CH](C(O)=O)N%10                         | 12.5_4 |
| C%11(COC1=CC2=CC=CC=C2C=C1OC)=O.O=C%10[CH](CC1=CC=CC=C1)N%11.O=C(O)[CH](CC1=CC=CC=C1)N%10              | 12.5_5 |
| C%11(COC1=CC2=CC=CC=C2C=C1OC)=O.O=C%10[CH](CC1=CC=CC=C1)N%11.CC[CH](C)[CH](C(O)=O)N%10                 | 12.5_6 |
| C%11(COC1=CC2=CC=CC=C2C=C1OC)=O.O=C%10[CH](CC1=CC=CC=C1)N%11.CSCC[CH](C(O)=O)N%10                      | 12.5_7 |
| C%11(COC1=CC2=CC=CC=C2C=C1OC)=O.O=C%10[CH](CC1=CC=CC=C1)N%11.OC(C=C1)=CC=C1C[CH](C(O)=O)N%10           | 12.5_8 |
| C%11(COC1=CC2=CC=CC=C2C=C1OC)=O.O=C%10[CH](CC1=CC=CC=C1)N%11.O=C(O)[CH](CC1=C(F)C(F)=C(F)C(F)=C1F)N%10 | 12.5_9 |
| C%11(COC1=CC2=CC=CC=C2C=C1OC)=O.CC[CH](C)[CH](C%10=O)N%11.O=C(O)CN%10                                  | 12.6_1 |
| C%11(COC1=CC2=CC=CC=C2C=C1OC)=O.CC[CH](C)[CH](C%10=O)N%11.CC(C)[CH](C(O)=O)N%10                        | 12.6_2 |
| C%11(COC1=CC2=CC=CC=C2C=C1OC)=O.CC[CH](C)[CH](C%10=O)N%11.CC(C)C[CH](C(O)=O)N%10                       | 12.6_3 |
| C%11(COC1=CC2=CC=CC=C2C=C1OC)=O.CC[CH](C)[CH](C%10=O)N%11.C[CH](C(O)=O)N%10                            | 12.6_4 |
| C%11(COC1=CC2=CC=CC=C2C=C1OC)=O.CC[CH](C)[CH](C%10=O)N%11.O=C(O)[CH](CC1=CC=CC=C1)N%10                 | 12.6_5 |
| C%11(COC1=CC2=CC=CC=C2C=C1OC)=O.CC[CH](C)[CH](C%10=O)N%11.CC[CH](C)[CH](C(O)=O)N%10                    | 12.6_6 |
| C%11(COC1=CC2=CC=CC=C2C=C1OC)=O.CC[CH](C)[CH](C%10=O)N%11.CSCC[CH](C(O)=O)N%10                         | 12.6_7 |
| C%11(COC1=CC2=CC=CC=C2C=C1OC)=O.CC[CH](C)[CH](C%10=O)N%11.OC(C=C1)=CC=C1C[CH](C(O)=O)N%10              | 12.6_8 |

|                                                                                                           |        |
|-----------------------------------------------------------------------------------------------------------|--------|
| C%11(COC1=CC2=CC=CC=C2C=C1OC)=O.CC[CH](C)[CH](C%10=O)N%11.O=C(O)[CH](CC1=C(F)C(F)=C(F)C(F)=C1F)N%10       | 12.6_9 |
| C%11(COC1=CC2=CC=CC=C2C=C1OC)=O.CSCC[CH](C%10=O)N%11.O=C(O)CN%10                                          | 12.7_1 |
| C%11(COC1=CC2=CC=CC=C2C=C1OC)=O.CSCC[CH](C%10=O)N%11.CC(C)[CH](C(O)=O)N%10                                | 12.7_2 |
| C%11(COC1=CC2=CC=CC=C2C=C1OC)=O.CSCC[CH](C%10=O)N%11.CC(C)C[CH](C(O)=O)N%10                               | 12.7_3 |
| C%11(COC1=CC2=CC=CC=C2C=C1OC)=O.CSCC[CH](C%10=O)N%11.C[CH](C(O)=O)N%10                                    | 12.7_4 |
| C%11(COC1=CC2=CC=CC=C2C=C1OC)=O.CSCC[CH](C%10=O)N%11.O=C(O)[CH](CC1=CC=CC=C1)N%10                         | 12.7_5 |
| C%11(COC1=CC2=CC=CC=C2C=C1OC)=O.CSCC[CH](C%10=O)N%11.CC[CH](C)[CH](C(O)=O)N%10                            | 12.7_6 |
| C%11(COC1=CC2=CC=CC=C2C=C1OC)=O.CSCC[CH](C%10=O)N%11.CSCC[CH](C(O)=O)N%10                                 | 12.7_7 |
| C%11(COC1=CC2=CC=CC=C2C=C1OC)=O.CSCC[CH](C%10=O)N%11.OC(C=C1)=CC=C1C[CH](C(O)=O)N%10                      | 12.7_8 |
| C%11(COC1=CC2=CC=CC=C2C=C1OC)=O.CSCC[CH](C%10=O)N%11.O=C(O)[CH](CC1=C(F)C(F)=C(F)C(F)=C1F)N%10            | 12.7_9 |
| C%11(COC1=CC2=CC=CC=C2C=C1OC)=O.OC(C=C1)=CC=C1C[CH](C%10=O)N%11.O=C(O)CN%10                               | 12.8_1 |
| C%11(COC1=CC2=CC=CC=C2C=C1OC)=O.OC(C=C1)=CC=C1C[CH](C%10=O)N%11.CC(C)[CH](C(O)=O)N%10                     | 12.8_2 |
| C%11(COC1=CC2=CC=CC=C2C=C1OC)=O.OC(C=C1)=CC=C1C[CH](C%10=O)N%11.CC(C)C[CH](C(O)=O)N%10                    | 12.8_3 |
| C%11(COC1=CC2=CC=CC=C2C=C1OC)=O.OC(C=C1)=CC=C1C[CH](C%10=O)N%11.C[CH](C(O)=O)N%10                         | 12.8_4 |
| C%11(COC1=CC2=CC=CC=C2C=C1OC)=O.OC(C=C1)=CC=C1C[CH](C%10=O)N%11.O=C(O)[CH](CC1=CC=CC=C1)N%10              | 12.8_5 |
| C%11(COC1=CC2=CC=CC=C2C=C1OC)=O.OC(C=C1)=CC=C1C[CH](C%10=O)N%11.CC[CH](C)[CH](C(O)=O)N%10                 | 12.8_6 |
| C%11(COC1=CC2=CC=CC=C2C=C1OC)=O.OC(C=C1)=CC=C1C[CH](C%10=O)N%11.CSCC[CH](C(O)=O)N%10                      | 12.8_7 |
| C%11(COC1=CC2=CC=CC=C2C=C1OC)=O.OC(C=C1)=CC=C1C[CH](C%10=O)N%11.OC(C=C1)=CC=C1C[CH](C(O)=O)N%10           | 12.8_8 |
| C%11(COC1=CC2=CC=CC=C2C=C1OC)=O.OC(C=C1)=CC=C1C[CH](C%10=O)N%11.O=C(O)[CH](CC1=C(F)C(F)=C(F)C(F)=C1F)N%10 | 12.8_9 |
| C%10(COC1=CC2=CC=CC=C2C=C1OC)=O.O=C(O)CN%10                                                               | 12.9_1 |
| C%10(COC1=CC2=CC=CC=C2C=C1OC)=O.CC(C)[CH](C(O)=O)N%10                                                     | 12.9_2 |
| C%10(COC1=CC2=CC=CC=C2C=C1OC)=O.CC(C)C[CH](C(O)=O)N%10                                                    | 12.9_3 |
| C%10(COC1=CC2=CC=CC=C2C=C1OC)=O.C[CH](C(O)=O)N%10                                                         | 12.9_4 |
| C%10(COC1=CC2=CC=CC=C2C=C1OC)=O.O=C(O)[CH](CC1=CC=CC=C1)N%10                                              | 12.9_5 |
| C%10(COC1=CC2=CC=CC=C2C=C1OC)=O.CC[CH](C)[CH](C(O)=O)N%10                                                 | 12.9_6 |
| C%10(COC1=CC2=CC=CC=C2C=C1OC)=O.CSCC[CH](C(O)=O)N%10                                                      | 12.9_7 |
| C%10(COC1=CC2=CC=CC=C2C=C1OC)=O.OC(C=C1)=CC=C1C[CH](C(O)=O)N%10                                           | 12.9_8 |
| C%10(COC1=CC2=CC=CC=C2C=C1OC)=O.O=C(O)[CH](CC1=C(F)C(F)=C(F)C(F)=C1F)N%10                                 | 12.9_9 |
| C%11(COC1=CC=CC2=CC=CC=C21)=O.O=C%10CN%11.O=C(O)CN%10                                                     | 13.1_1 |
| C%11(COC1=CC=CC2=CC=CC=C21)=O.O=C%10CN%11.CC(C)[CH](C(O)=O)N%10                                           | 13.1_2 |
| C%11(COC1=CC=CC2=CC=CC=C21)=O.O=C%10CN%11.CC(C)C[CH](C(O)=O)N%10                                          | 13.1_3 |



|                                                                                                |        |
|------------------------------------------------------------------------------------------------|--------|
| C%11(COC1=CC=CC2=CC=CC=C21)=O.O=C%10CN%11.C[CH](C(O)=O)N%10                                    | 13.1_4 |
| C%11(COC1=CC=CC2=CC=CC=C21)=O.O=C%10CN%11.O=C(O)[CH](CC1=CC=CC=C1)N%10                         | 13.1_5 |
| C%11(COC1=CC=CC2=CC=CC=C21)=O.O=C%10CN%11.CC[CH](C)[CH](C(O)=O)N%10                            | 13.1_6 |
| C%11(COC1=CC=CC2=CC=CC=C21)=O.O=C%10CN%11.CSCC[CH](C(O)=O)N%10                                 | 13.1_7 |
| C%11(COC1=CC=CC2=CC=CC=C21)=O.O=C%10CN%11.OC(C=C1)=CC=C1C[CH](C(O)=O)N%10                      | 13.1_8 |
| C%11(COC1=CC=CC2=CC=CC=C21)=O.O=C%10CN%11.O=C(O)[CH](CC1=C(F)C(F)=C(F)C(F)=C1F)N%10            | 13.1_9 |
| C%11(COC1=CC=CC2=CC=CC=C21)=O.CC(C)[CH](C%10=O)N%11.O=C(O)CN%10                                | 13.2_1 |
| C%11(COC1=CC=CC2=CC=CC=C21)=O.CC(C)[CH](C%10=O)N%11.CC(C)[CH](C(O)=O)N%10                      | 13.2_2 |
| C%11(COC1=CC=CC2=CC=CC=C21)=O.CC(C)[CH](C%10=O)N%11.CC(C)C[CH](C(O)=O)N%10                     | 13.2_3 |
| C%11(COC1=CC=CC2=CC=CC=C21)=O.CC(C)[CH](C%10=O)N%11.C[CH](C(O)=O)N%10                          | 13.2_4 |
| C%11(COC1=CC=CC2=CC=CC=C21)=O.CC(C)[CH](C%10=O)N%11.O=C(O)[CH](CC1=CC=CC=C1)N%10               | 13.2_5 |
| C%11(COC1=CC=CC2=CC=CC=C21)=O.CC(C)[CH](C%10=O)N%11.CC[CH](C)[CH](C(O)=O)N%10                  | 13.2_6 |
| C%11(COC1=CC=CC2=CC=CC=C21)=O.CC(C)[CH](C%10=O)N%11.CSCC[CH](C(O)=O)N%10                       | 13.2_7 |
| C%11(COC1=CC=CC2=CC=CC=C21)=O.CC(C)[CH](C%10=O)N%11.OC(C=C1)=CC=C1C[CH](C(O)=O)N%10            | 13.2_8 |
| C%11(COC1=CC=CC2=CC=CC=C21)=O.CC(C)[CH](C%10=O)N%11.O=C(O)[CH](CC1=C(F)C(F)=C(F)C(F)=C1F)N%10  | 13.2_9 |
| C%11(COC1=CC=CC2=CC=CC=C21)=O.CC(C)C[CH](C%10=O)N%11.O=C(O)CN%10                               | 13.3_1 |
| C%11(COC1=CC=CC2=CC=CC=C21)=O.CC(C)C[CH](C%10=O)N%11.CC(C)[CH](C(O)=O)N%10                     | 13.3_2 |
| C%11(COC1=CC=CC2=CC=CC=C21)=O.CC(C)C[CH](C%10=O)N%11.CC(C)C[CH](C(O)=O)N%10                    | 13.3_3 |
| C%11(COC1=CC=CC2=CC=CC=C21)=O.CC(C)C[CH](C%10=O)N%11.C[CH](C(O)=O)N%10                         | 13.3_4 |
| C%11(COC1=CC=CC2=CC=CC=C21)=O.CC(C)C[CH](C%10=O)N%11.O=C(O)[CH](CC1=CC=CC=C1)N%10              | 13.3_5 |
| C%11(COC1=CC=CC2=CC=CC=C21)=O.CC(C)C[CH](C%10=O)N%11.CC[CH](C)[CH](C(O)=O)N%10                 | 13.3_6 |
| C%11(COC1=CC=CC2=CC=CC=C21)=O.CC(C)C[CH](C%10=O)N%11.CSCC[CH](C(O)=O)N%10                      | 13.3_7 |
| C%11(COC1=CC=CC2=CC=CC=C21)=O.CC(C)C[CH](C%10=O)N%11.OC(C=C1)=CC=C1C[CH](C(O)=O)N%10           | 13.3_8 |
| C%11(COC1=CC=CC2=CC=CC=C21)=O.CC(C)C[CH](C%10=O)N%11.O=C(O)[CH](CC1=C(F)C(F)=C(F)C(F)=C1F)N%10 | 13.3_9 |
| C%11(COC1=CC=CC2=CC=CC=C21)=O.C[CH](C%10=O)N%11.O=C(O)CN%10                                    | 13.4_1 |
| C%11(COC1=CC=CC2=CC=CC=C21)=O.C[CH](C%10=O)N%11.CC(C)[CH](C(O)=O)N%10                          | 13.4_2 |
| C%11(COC1=CC=CC2=CC=CC=C21)=O.C[CH](C%10=O)N%11.CC(C)C[CH](C(O)=O)N%10                         | 13.4_3 |
| C%11(COC1=CC=CC2=CC=CC=C21)=O.C[CH](C%10=O)N%11.C[CH](C(O)=O)N%10                              | 13.4_4 |
| C%11(COC1=CC=CC2=CC=CC=C21)=O.C[CH](C%10=O)N%11.O=C(O)[CH](CC1=CC=CC=C1)N%10                   | 13.4_5 |
| C%11(COC1=CC=CC2=CC=CC=C21)=O.C[CH](C%10=O)N%11.CC[CH](C)[CH](C(O)=O)N%10                      | 13.4_6 |
| C%11(COC1=CC=CC2=CC=CC=C21)=O.C[CH](C%10=O)N%11.CSCC[CH](C(O)=O)N%10                           | 13.4_7 |
| C%11(COC1=CC=CC2=CC=CC=C21)=O.C[CH](C%10=O)N%11.OC(C=C1)=CC=C1C[CH](C(O)=O)N%10                | 13.4_8 |

|                                                                                                      |        |
|------------------------------------------------------------------------------------------------------|--------|
| =O)N%10                                                                                              |        |
| C%11(COC1=CC=CC2=CC=CC=C21)=O.C[CH](C%10=O)N%11.O=C(O)[CH](CC1=C(F)C(F)=C(F)C(F)=C1F)N%10            | 13.4_9 |
| C%11(COC1=CC=CC2=CC=CC=C21)=O.O=C%10[CH](CC1=CC=CC=C1)N%11.O=C(O)CN%10                               | 13.5_1 |
| C%11(COC1=CC=CC2=CC=CC=C21)=O.O=C%10[CH](CC1=CC=CC=C1)N%11.CC(C)[CH](C(O)=O)N%10                     | 13.5_2 |
| C%11(COC1=CC=CC2=CC=CC=C21)=O.O=C%10[CH](CC1=CC=CC=C1)N%11.CC(C)C[CH](C(O)=O)N%10                    | 13.5_3 |
| C%11(COC1=CC=CC2=CC=CC=C21)=O.O=C%10[CH](CC1=CC=CC=C1)N%11.C[CH](C(O)=O)N%10                         | 13.5_4 |
| C%11(COC1=CC=CC2=CC=CC=C21)=O.O=C%10[CH](CC1=CC=CC=C1)N%11.O=C(O)[CH](CC1=CC=CC=C1)N%10              | 13.5_5 |
| C%11(COC1=CC=CC2=CC=CC=C21)=O.O=C%10[CH](CC1=CC=CC=C1)N%11.CC[CH](C)[CH](C(O)=O)N%10                 | 13.5_6 |
| C%11(COC1=CC=CC2=CC=CC=C21)=O.O=C%10[CH](CC1=CC=CC=C1)N%11.CSCC[CH](C(O)=O)N%10                      | 13.5_7 |
| C%11(COC1=CC=CC2=CC=CC=C21)=O.O=C%10[CH](CC1=CC=CC=C1)N%11.OC(C=C1)=CC=C1C[CH](C(O)=O)N%10           | 13.5_8 |
| C%11(COC1=CC=CC2=CC=CC=C21)=O.O=C%10[CH](CC1=CC=CC=C1)N%11.O=C(O)[CH](CC1=C(F)C(F)=C(F)C(F)=C1F)N%10 | 13.5_9 |
| C%11(COC1=CC=CC2=CC=CC=C21)=O.CC[CH](C)[CH](C%10=O)N%11.O=C(O)CN%10                                  | 13.6_1 |
| C%11(COC1=CC=CC2=CC=CC=C21)=O.CC[CH](C)[CH](C%10=O)N%11.CC(C)[CH](C(O)=O)N%10                        | 13.6_2 |
| C%11(COC1=CC=CC2=CC=CC=C21)=O.CC[CH](C)[CH](C%10=O)N%11.CC(C)C[CH](C(O)=O)N%10                       | 13.6_3 |
| C%11(COC1=CC=CC2=CC=CC=C21)=O.CC[CH](C)[CH](C%10=O)N%11.C[CH](C(O)=O)N%10                            | 13.6_4 |
| C%11(COC1=CC=CC2=CC=CC=C21)=O.CC[CH](C)[CH](C%10=O)N%11.O=C(O)[CH](CC1=CC=CC=C1)N%10                 | 13.6_5 |
| C%11(COC1=CC=CC2=CC=CC=C21)=O.CC[CH](C)[CH](C%10=O)N%11.CC[CH](C)[CH](C(O)=O)N%10                    | 13.6_6 |
| C%11(COC1=CC=CC2=CC=CC=C21)=O.CC[CH](C)[CH](C%10=O)N%11.CSCC[CH](C(O)=O)N%10                         | 13.6_7 |
| C%11(COC1=CC=CC2=CC=CC=C21)=O.CC[CH](C)[CH](C%10=O)N%11.OC(C=C1)=CC=C1C[CH](C(O)=O)N%10              | 13.6_8 |
| C%11(COC1=CC=CC2=CC=CC=C21)=O.CC[CH](C)[CH](C%10=O)N%11.O=C(O)[CH](CC1=C(F)C(F)=C(F)C(F)=C1F)N%10    | 13.6_9 |
| C%11(COC1=CC=CC2=CC=CC=C21)=O.CSCC[CH](C%10=O)N%11.O=C(O)CN%10                                       | 13.7_1 |
| C%11(COC1=CC=CC2=CC=CC=C21)=O.CSCC[CH](C%10=O)N%11.CC(C)[CH](C(O)=O)N%10                             | 13.7_2 |
| C%11(COC1=CC=CC2=CC=CC=C21)=O.CSCC[CH](C%10=O)N%11.CC(C)C[CH](C(O)=O)N%10                            | 13.7_3 |
| C%11(COC1=CC=CC2=CC=CC=C21)=O.CSCC[CH](C%10=O)N%11.C[CH](C(O)=O)N%10                                 | 13.7_4 |
| C%11(COC1=CC=CC2=CC=CC=C21)=O.CSCC[CH](C%10=O)N%11.O=C(O)[CH](CC1=CC=CC=C1)N%10                      | 13.7_5 |
| C%11(COC1=CC=CC2=CC=CC=C21)=O.CSCC[CH](C%10=O)N%11.CC[CH](C)[CH](C(O)=O)N%10                         | 13.7_6 |
| C%11(COC1=CC=CC2=CC=CC=C21)=O.CSCC[CH](C%10=O)N%11.CSCC[CH](C(O)=O)N%10                              | 13.7_7 |
| C%11(COC1=CC=CC2=CC=CC=C21)=O.CSCC[CH](C%10=O)N%11.OC(C=C1)=CC=C1C[CH](C(O)=O)N%10                   | 13.7_8 |

|                                                                                                         |        |
|---------------------------------------------------------------------------------------------------------|--------|
| C%11(COC1=CC=CC2=CC=CC=C21)=O.CSCC[CH](C%10=O)N%11.O=C(O)[CH](CC1=C(F)C(F)=C(F)C(F)=C1F)N%10            | 13.7_9 |
| C%11(COC1=CC=CC2=CC=CC=C21)=O.OC(C=C1)=CC=C1C[CH](C%10=O)N%11.O=C(O)CN%10                               | 13.8_1 |
| C%11(COC1=CC=CC2=CC=CC=C21)=O.OC(C=C1)=CC=C1C[CH](C%10=O)N%11.CC(C)[CH](C(O)=O)N%10                     | 13.8_2 |
| C%11(COC1=CC=CC2=CC=CC=C21)=O.OC(C=C1)=CC=C1C[CH](C%10=O)N%11.CC(C)C[CH](C(O)=O)N%10                    | 13.8_3 |
| C%11(COC1=CC=CC2=CC=CC=C21)=O.OC(C=C1)=CC=C1C[CH](C%10=O)N%11.C[CH](C(O)=O)N%10                         | 13.8_4 |
| C%11(COC1=CC=CC2=CC=CC=C21)=O.OC(C=C1)=CC=C1C[CH](C%10=O)N%11.O=C(O)[CH](CC1=CC=CC=C1)N%10              | 13.8_5 |
| C%11(COC1=CC=CC2=CC=CC=C21)=O.OC(C=C1)=CC=C1C[CH](C%10=O)N%11.CC[CH](C)[CH](C(O)=O)N%10                 | 13.8_6 |
| C%11(COC1=CC=CC2=CC=CC=C21)=O.OC(C=C1)=CC=C1C[CH](C%10=O)N%11.CSCC[CH](C(O)=O)N%10                      | 13.8_7 |
| C%11(COC1=CC=CC2=CC=CC=C21)=O.OC(C=C1)=CC=C1C[CH](C%10=O)N%11.OC(C=C1)=CC=C1C[CH](C(O)=O)N%10           | 13.8_8 |
| C%11(COC1=CC=CC2=CC=CC=C21)=O.OC(C=C1)=CC=C1C[CH](C%10=O)N%11.O=C(O)[CH](CC1=C(F)C(F)=C(F)C(F)=C1F)N%10 | 13.8_9 |
| C%10(COC1=CC=CC2=CC=CC=C21)=O.O=C(O)CN%10                                                               | 13.9_1 |
| C%10(COC1=CC=CC2=CC=CC=C21)=O.CC(C)[CH](C(O)=O)N%10                                                     | 13.9_2 |
| C%10(COC1=CC=CC2=CC=CC=C21)=O.CC(C)C[CH](C(O)=O)N%10                                                    | 13.9_3 |
| C%10(COC1=CC=CC2=CC=CC=C21)=O.C[CH](C(O)=O)N%10                                                         | 13.9_4 |
| C%10(COC1=CC=CC2=CC=CC=C21)=O.O=C(O)[CH](CC1=CC=CC=C1)N%10                                              | 13.9_5 |
| C%10(COC1=CC=CC2=CC=CC=C21)=O.CC[CH](C)[CH](C(O)=O)N%10                                                 | 13.9_6 |
| C%10(COC1=CC=CC2=CC=CC=C21)=O.CSCC[CH](C(O)=O)N%10                                                      | 13.9_7 |
| C%10(COC1=CC=CC2=CC=CC=C21)=O.OC(C=C1)=CC=C1C[CH](C(O)=O)N%10                                           | 13.9_8 |
| C%10(COC1=CC=CC2=CC=CC=C21)=O.O=C(O)[CH](CC1=C(F)C(F)=C(F)C(F)=C1F)N%10                                 | 13.9_9 |
| C%11(COC1=CC=CC2=CC(C#N)=CC=C21)=O.O=C%10CN%11.O=C(O)CN%10                                              | 14.1_1 |
| C%11(COC1=CC=CC2=CC(C#N)=CC=C21)=O.O=C%10CN%11.CC(C)[CH](C(O)=O)N%10                                    | 14.1_2 |
| C%11(COC1=CC=CC2=CC(C#N)=CC=C21)=O.O=C%10CN%11.CC(C)C[CH](C(O)=O)N%10                                   | 14.1_3 |
| C%11(COC1=CC=CC2=CC(C#N)=CC=C21)=O.O=C%10CN%11.C[CH](C(O)=O)N%10                                        | 14.1_4 |
| C%11(COC1=CC=CC2=CC(C#N)=CC=C21)=O.O=C%10CN%11.O=C(O)[CH](CC1=CC=CC=C1)N%10                             | 14.1_5 |
| C%11(COC1=CC=CC2=CC(C#N)=CC=C21)=O.O=C%10CN%11.CC[CH](C)[CH](C(O)=O)N%10                                | 14.1_6 |
| C%11(COC1=CC=CC2=CC(C#N)=CC=C21)=O.O=C%10CN%11.CSCC[CH](C(O)=O)N%10                                     | 14.1_7 |
| C%11(COC1=CC=CC2=CC(C#N)=CC=C21)=O.O=C%10CN%11.OC(C=C1)=CC=C1C[CH](C(O)=O)N%10                          | 14.1_8 |
| C%11(COC1=CC=CC2=CC(C#N)=CC=C21)=O.O=C%10CN%11.O=C(O)[CH](CC1=C(F)C(F)=C(F)C(F)=C1F)N%10                | 14.1_9 |
| C%11(COC1=CC=CC2=CC(C#N)=CC=C21)=O.CC(C)[CH](C%10=O)N%11.O=C(O)CN%10                                    | 14.2_1 |
| C%11(COC1=CC=CC2=CC(C#N)=CC=C21)=O.CC(C)[CH](C%10=O)N%11.CC(C)[CH](C(O)=O)N%10                          | 14.2_2 |
| C%11(COC1=CC=CC2=CC(C#N)=CC=C21)=O.CC(C)[CH](C%10=O)N%11.CC(C)C[CH](C(O)=O)N%10                         | 14.2_3 |
| C%11(COC1=CC=CC2=CC(C#N)=CC=C21)=O.CC(C)[CH](C%10=O)N%11.C[CH](C(O)=O)N%10                              | 14.2_4 |

|                                                                                                          |        |
|----------------------------------------------------------------------------------------------------------|--------|
| 0                                                                                                        |        |
| C%11(COC1=CC=CC2=CC(C#N)=CC=C21)=O.CC(C)[CH](C%10=O)N%11.O=C(O)[CH](CC1=C<br>C=CC=C1)N%10                | 14.2_5 |
| C%11(COC1=CC=CC2=CC(C#N)=CC=C21)=O.CC(C)[CH](C%10=O)N%11.CC[CH](C)[CH](C(O)<br>=O)N%10                   | 14.2_6 |
| C%11(COC1=CC=CC2=CC(C#N)=CC=C21)=O.CC(C)[CH](C%10=O)N%11.CSCC[CH](C(O)=O)<br>N%10                        | 14.2_7 |
| C%11(COC1=CC=CC2=CC(C#N)=CC=C21)=O.CC(C)[CH](C%10=O)N%11.OC(C=C1)=CC=C1C[<br>CH](C(O)=O)N%10             | 14.2_8 |
| C%11(COC1=CC=CC2=CC(C#N)=CC=C21)=O.CC(C)[CH](C%10=O)N%11.O=C(O)[CH](CC1=C<br>(F)C(F)=C(F)C(F)=C1F)N%10   | 14.2_9 |
| C%11(COC1=CC=CC2=CC(C#N)=CC=C21)=O.CC(C)C[CH](C%10=O)N%11.O=C(O)CN%10                                    | 14.3_1 |
| C%11(COC1=CC=CC2=CC(C#N)=CC=C21)=O.CC(C)C[CH](C%10=O)N%11.CC(C)[CH](C(O)=O<br>)N%10                      | 14.3_2 |
| C%11(COC1=CC=CC2=CC(C#N)=CC=C21)=O.CC(C)C[CH](C%10=O)N%11.CC(C)C[CH](C(O)=<br>O)N%10                     | 14.3_3 |
| C%11(COC1=CC=CC2=CC(C#N)=CC=C21)=O.CC(C)C[CH](C%10=O)N%11.C[CH](C(O)=O)N%<br>10                          | 14.3_4 |
| C%11(COC1=CC=CC2=CC(C#N)=CC=C21)=O.CC(C)C[CH](C%10=O)N%11.O=C(O)[CH](CC1=C<br>CC=CC=C1)N%10              | 14.3_5 |
| C%11(COC1=CC=CC2=CC(C#N)=CC=C21)=O.CC(C)C[CH](C%10=O)N%11.CC[CH](C)[CH](C(<br>O)=O)N%10                  | 14.3_6 |
| C%11(COC1=CC=CC2=CC(C#N)=CC=C21)=O.CC(C)C[CH](C%10=O)N%11.CSCC[CH](C(O)=O<br>)N%10                       | 14.3_7 |
| C%11(COC1=CC=CC2=CC(C#N)=CC=C21)=O.CC(C)C[CH](C%10=O)N%11.OC(C=C1)=CC=C1<br>C[CH](C(O)=O)N%10            | 14.3_8 |
| C%11(COC1=CC=CC2=CC(C#N)=CC=C21)=O.CC(C)C[CH](C%10=O)N%11.O=C(O)[CH](CC1=C<br>C(F)C(F)=C(F)C(F)=C1F)N%10 | 14.3_9 |
| C%11(COC1=CC=CC2=CC(C#N)=CC=C21)=O.C[CH](C%10=O)N%11.O=C(O)CN%10                                         | 14.4_1 |
| C%11(COC1=CC=CC2=CC(C#N)=CC=C21)=O.C[CH](C%10=O)N%11.CC(C)[CH](C(O)=O)N%1<br>0                           | 14.4_2 |
| C%11(COC1=CC=CC2=CC(C#N)=CC=C21)=O.C[CH](C%10=O)N%11.CC(C)C[CH](C(O)=O)N%<br>10                          | 14.4_3 |
| C%11(COC1=CC=CC2=CC(C#N)=CC=C21)=O.C[CH](C%10=O)N%11.C[CH](C(O)=O)N%10                                   | 14.4_4 |
| C%11(COC1=CC=CC2=CC(C#N)=CC=C21)=O.C[CH](C%10=O)N%11.O=C(O)[CH](CC1=CC=C<br>C=C1)N%10                    | 14.4_5 |
| C%11(COC1=CC=CC2=CC(C#N)=CC=C21)=O.C[CH](C%10=O)N%11.CC[CH](C)[CH](C(O)=O)<br>N%10                       | 14.4_6 |
| C%11(COC1=CC=CC2=CC(C#N)=CC=C21)=O.C[CH](C%10=O)N%11.CSCC[CH](C(O)=O)N%1<br>0                            | 14.4_7 |
| C%11(COC1=CC=CC2=CC(C#N)=CC=C21)=O.C[CH](C%10=O)N%11.OC(C=C1)=CC=C1C[CH]<br>(C(O)=O)N%10                 | 14.4_8 |
| C%11(COC1=CC=CC2=CC(C#N)=CC=C21)=O.C[CH](C%10=O)N%11.O=C(O)[CH](CC1=C(F)C<br>(F)=C(F)C(F)=C1F)N%10       | 14.4_9 |
| C%11(COC1=CC=CC2=CC(C#N)=CC=C21)=O.O=C%10[CH](CC1=CC=CC=C1)N%11.O=C(O)C<br>N%10                          | 14.5_1 |
| C%11(COC1=CC=CC2=CC(C#N)=CC=C21)=O.O=C%10[CH](CC1=CC=CC=C1)N%11.CC(C)[CH<br>(C(O)=O)N%10                 | 14.5_2 |
| C%11(COC1=CC=CC2=CC(C#N)=CC=C21)=O.O=C%10[CH](CC1=CC=CC=C1)N%11.CC(C)C[C                                 | 14.5_3 |

|                                                                                                           |        |
|-----------------------------------------------------------------------------------------------------------|--------|
| H](C(O)=O)N%10                                                                                            |        |
| C%11(COC1=CC=CC2=CC(C#N)=CC=C21)=O.O=C%10[CH](CC1=CC=CC=C1)N%11.C[CH](C(O)=O)N%10                         | 14.5_4 |
| C%11(COC1=CC=CC2=CC(C#N)=CC=C21)=O.O=C%10[CH](CC1=CC=CC=C1)N%11.O=C(O)[CH](CC1=CC=CC=C1)N%10              | 14.5_5 |
| C%11(COC1=CC=CC2=CC(C#N)=CC=C21)=O.O=C%10[CH](CC1=CC=CC=C1)N%11.CC[CH](C)[CH](C(O)=O)N%10                 | 14.5_6 |
| C%11(COC1=CC=CC2=CC(C#N)=CC=C21)=O.O=C%10[CH](CC1=CC=CC=C1)N%11.CSCC[CH](C(O)=O)N%10                      | 14.5_7 |
| C%11(COC1=CC=CC2=CC(C#N)=CC=C21)=O.O=C%10[CH](CC1=CC=CC=C1)N%11.OC(C=C1)=CC=C1C[CH](C(O)=O)N%10           | 14.5_8 |
| C%11(COC1=CC=CC2=CC(C#N)=CC=C21)=O.O=C%10[CH](CC1=CC=CC=C1)N%11.O=C(O)[CH](CC1=C(F)C(F)=C(F)C(F)=C1F)N%10 | 14.5_9 |
| C%11(COC1=CC=CC2=CC(C#N)=CC=C21)=O.CC[CH](C)[CH](C%10=O)N%11.O=C(O)CN%10                                  | 14.6_1 |
| C%11(COC1=CC=CC2=CC(C#N)=CC=C21)=O.CC[CH](C)[CH](C%10=O)N%11.CC(C)[CH](C(O)=O)N%10                        | 14.6_2 |
| C%11(COC1=CC=CC2=CC(C#N)=CC=C21)=O.CC[CH](C)[CH](C%10=O)N%11.CC(C)C[CH](C(O)=O)N%10                       | 14.6_3 |
| C%11(COC1=CC=CC2=CC(C#N)=CC=C21)=O.CC[CH](C)[CH](C%10=O)N%11.C[CH](C(O)=O)N%10                            | 14.6_4 |
| C%11(COC1=CC=CC2=CC(C#N)=CC=C21)=O.CC[CH](C)[CH](C%10=O)N%11.O=C(O)[CH](CC1=CC=CC=C1)N%10                 | 14.6_5 |
| C%11(COC1=CC=CC2=CC(C#N)=CC=C21)=O.CC[CH](C)[CH](C%10=O)N%11.CC[CH](C)[CH](C(O)=O)N%10                    | 14.6_6 |
| C%11(COC1=CC=CC2=CC(C#N)=CC=C21)=O.CC[CH](C)[CH](C%10=O)N%11.CSCC[CH](C(O)=O)N%10                         | 14.6_7 |
| C%11(COC1=CC=CC2=CC(C#N)=CC=C21)=O.CC[CH](C)[CH](C%10=O)N%11.OC(C=C1)=CC=C1C[CH](C(O)=O)N%10              | 14.6_8 |
| C%11(COC1=CC=CC2=CC(C#N)=CC=C21)=O.CC[CH](C)[CH](C%10=O)N%11.O=C(O)[CH](CC1=C(F)C(F)=C(F)C(F)=C1F)N%10    | 14.6_9 |
| C%11(COC1=CC=CC2=CC(C#N)=CC=C21)=O.CSCC[CH](C%10=O)N%11.O=C(O)CN%10                                       | 14.7_1 |
| C%11(COC1=CC=CC2=CC(C#N)=CC=C21)=O.CSCC[CH](C%10=O)N%11.CC(C)[CH](C(O)=O)N%10                             | 14.7_2 |
| C%11(COC1=CC=CC2=CC(C#N)=CC=C21)=O.CSCC[CH](C%10=O)N%11.CC(C)C[CH](C(O)=O)N%10                            | 14.7_3 |
| C%11(COC1=CC=CC2=CC(C#N)=CC=C21)=O.CSCC[CH](C%10=O)N%11.C[CH](C(O)=O)N%10                                 | 14.7_4 |
| C%11(COC1=CC=CC2=CC(C#N)=CC=C21)=O.CSCC[CH](C%10=O)N%11.O=C(O)[CH](CC1=CC=CC=C1)N%10                      | 14.7_5 |
| C%11(COC1=CC=CC2=CC(C#N)=CC=C21)=O.CSCC[CH](C%10=O)N%11.CC[CH](C)[CH](C(O)=O)N%10                         | 14.7_6 |
| C%11(COC1=CC=CC2=CC(C#N)=CC=C21)=O.CSCC[CH](C%10=O)N%11.CSCC[CH](C(O)=O)N%10                              | 14.7_7 |
| C%11(COC1=CC=CC2=CC(C#N)=CC=C21)=O.CSCC[CH](C%10=O)N%11.OC(C=C1)=CC=C1C[CH](C(O)=O)N%10                   | 14.7_8 |
| C%11(COC1=CC=CC2=CC(C#N)=CC=C21)=O.CSCC[CH](C%10=O)N%11.O=C(O)[CH](CC1=C(F)C(F)=C(F)C(F)=C1F)N%10         | 14.7_9 |
| C%11(COC1=CC=CC2=CC(C#N)=CC=C21)=O.OC(C=C1)=CC=C1C[CH](C%10=O)N%11.O=C(O)CN%10                            | 14.8_1 |

|                                                                                                              |        |
|--------------------------------------------------------------------------------------------------------------|--------|
| C%11(COC1=CC=CC2=CC(C#N)=CC=C21)=O.OC(C=C1)=CC=C1C[CH](C%10=O)N%11.CC(C)[CH](C(O)=O)N%10                     | 14.8_2 |
| C%11(COC1=CC=CC2=CC(C#N)=CC=C21)=O.OC(C=C1)=CC=C1C[CH](C%10=O)N%11.CC(C)C[CH](C(O)=O)N%10                    | 14.8_3 |
| C%11(COC1=CC=CC2=CC(C#N)=CC=C21)=O.OC(C=C1)=CC=C1C[CH](C%10=O)N%11.C[CH](C(O)=O)N%10                         | 14.8_4 |
| C%11(COC1=CC=CC2=CC(C#N)=CC=C21)=O.OC(C=C1)=CC=C1C[CH](C%10=O)N%11.O=C(O)[CH](CC1=CC=CC=C1)N%10              | 14.8_5 |
| C%11(COC1=CC=CC2=CC(C#N)=CC=C21)=O.OC(C=C1)=CC=C1C[CH](C%10=O)N%11.CC[CH](C)[CH](C(O)=O)N%10                 | 14.8_6 |
| C%11(COC1=CC=CC2=CC(C#N)=CC=C21)=O.OC(C=C1)=CC=C1C[CH](C%10=O)N%11.CSCC[CH](C(O)=O)N%10                      | 14.8_7 |
| C%11(COC1=CC=CC2=CC(C#N)=CC=C21)=O.OC(C=C1)=CC=C1C[CH](C%10=O)N%11.OC(C=C1)=CC=C1C[CH](C(O)=O)N%10           | 14.8_8 |
| C%11(COC1=CC=CC2=CC(C#N)=CC=C21)=O.OC(C=C1)=CC=C1C[CH](C%10=O)N%11.O=C(O)[CH](CC1=C(F)C(F)=C(F)C(F)=C1F)N%10 | 14.8_9 |
| C%10(COC1=CC=CC2=CC(C#N)=CC=C21)=O.O=C(O)CN%10                                                               | 14.9_1 |
| C%10(COC1=CC=CC2=CC(C#N)=CC=C21)=O.CC(C)[CH](C(O)=O)N%10                                                     | 14.9_2 |
| C%10(COC1=CC=CC2=CC(C#N)=CC=C21)=O.CC(C)C[CH](C(O)=O)N%10                                                    | 14.9_3 |
| C%10(COC1=CC=CC2=CC(C#N)=CC=C21)=O.C[CH](C(O)=O)N%10                                                         | 14.9_4 |
| C%10(COC1=CC=CC2=CC(C#N)=CC=C21)=O.O=C(O)[CH](CC1=CC=CC=C1)N%10                                              | 14.9_5 |
| C%10(COC1=CC=CC2=CC(C#N)=CC=C21)=O.CC[CH](C)[CH](C(O)=O)N%10                                                 | 14.9_6 |
| C%10(COC1=CC=CC2=CC(C#N)=CC=C21)=O.CSCC[CH](C(O)=O)N%10                                                      | 14.9_7 |
| C%10(COC1=CC=CC2=CC(C#N)=CC=C21)=O.OC(C=C1)=CC=C1C[CH](C(O)=O)N%10                                           | 14.9_8 |
| C%10(COC1=CC=CC2=CC(C#N)=CC=C21)=O.O=C(O)[CH](CC1=C(F)C(F)=C(F)C(F)=C1F)N%10                                 | 14.9_9 |
| C%11(COC1=CC2=CC=CC=C2C=C1OC)=O.O=C%10CN%11.O=C(O)CN%10                                                      | 15.1_1 |
| C%11(COC1=CC2=CC=CC=C2C=C1OC)=O.O=C%10CN%11.CC(C)[CH](C(O)=O)N%10                                            | 15.1_2 |
| C%11(COC1=CC2=CC=CC=C2C=C1OC)=O.O=C%10CN%11.CC(C)C[CH](C(O)=O)N%10                                           | 15.1_3 |
| C%11(COC1=CC2=CC=CC=C2C=C1OC)=O.O=C%10CN%11.C[CH](C(O)=O)N%10                                                | 15.1_4 |
| C%11(COC1=CC2=CC=CC=C2C=C1OC)=O.O=C%10CN%11.O=C(O)[CH](CC1=CC=CC=C1)N%10                                     | 15.1_5 |
| C%11(COC1=CC2=CC=CC=C2C=C1OC)=O.O=C%10CN%11.CC[CH](C)[CH](C(O)=O)N%10                                        | 15.1_6 |
| C%11(COC1=CC2=CC=CC=C2C=C1OC)=O.O=C%10CN%11.CSCC[CH](C(O)=O)N%10                                             | 15.1_7 |
| C%11(COC1=CC2=CC=CC=C2C=C1OC)=O.O=C%10CN%11.OC(C=C1)=CC=C1C[CH](C(O)=O)N%10                                  | 15.1_8 |
| C%11(COC1=CC2=CC=CC=C2C=C1OC)=O.O=C%10CN%11.O=C(O)[CH](CC1=C(F)C(F)=C(F)C(F)=C1F)N%10                        | 15.1_9 |
| C%11(COC1=CC2=CC=CC=C2C=C1OC)=O.CC(C)[CH](C%10=O)N%11.O=C(O)CN%10                                            | 15.2_1 |
| C%11(COC1=CC2=CC=CC=C2C=C1OC)=O.CC(C)[CH](C%10=O)N%11.CC(C)[CH](C(O)=O)N%10                                  | 15.2_2 |
| C%11(COC1=CC2=CC=CC=C2C=C1OC)=O.CC(C)[CH](C%10=O)N%11.CC(C)C[CH](C(O)=O)N%10                                 | 15.2_3 |
| C%11(COC1=CC2=CC=CC=C2C=C1OC)=O.CC(C)[CH](C%10=O)N%11.C[CH](C(O)=O)N%10                                      | 15.2_4 |
| C%11(COC1=CC2=CC=CC=C2C=C1OC)=O.CC(C)[CH](C%10=O)N%11.O=C(O)[CH](CC1=CC=CC=C1)N%10                           | 15.2_5 |
| C%11(COC1=CC2=CC=CC=C2C=C1OC)=O.CC(C)[CH](C%10=O)N%11.CC[CH](C)[CH](C(O)=O)N%10                              | 15.2_6 |

|                                                                                                  |        |
|--------------------------------------------------------------------------------------------------|--------|
| O)N%10                                                                                           |        |
| C%11(COC1=CC2=CC=CC=C2C=C1OC)=O.CC(C)[CH](C%10=O)N%11.CSCC[CH](C(O)=O)N%10                       | 15.2_7 |
| C%11(COC1=CC2=CC=CC=C2C=C1OC)=O.CC(C)[CH](C%10=O)N%11.OC(C=C1)=CC=C1C[CH](C(O)=O)N%10            | 15.2_8 |
| C%11(COC1=CC2=CC=CC=C2C=C1OC)=O.CC(C)[CH](C%10=O)N%11.O=C(O)[CH](CC1=C(F)C(F)=C(F)C(F)=C1F)N%10  | 15.2_9 |
| C%11(COC1=CC2=CC=CC=C2C=C1OC)=O.CC(C)C[CH](C%10=O)N%11.O=C(O)CN%10                               | 15.3_1 |
| C%11(COC1=CC2=CC=CC=C2C=C1OC)=O.CC(C)C[CH](C%10=O)N%11.CC(C)[CH](C(O)=O)N%10                     | 15.3_2 |
| C%11(COC1=CC2=CC=CC=C2C=C1OC)=O.CC(C)C[CH](C%10=O)N%11.CC(C)C[CH](C(O)=O)N%10                    | 15.3_3 |
| C%11(COC1=CC2=CC=CC=C2C=C1OC)=O.CC(C)C[CH](C%10=O)N%11.C[CH](C(O)=O)N%10                         | 15.3_4 |
| C%11(COC1=CC2=CC=CC=C2C=C1OC)=O.CC(C)C[CH](C%10=O)N%11.O=C(O)[CH](CC1=CC=CC=C1)N%10              | 15.3_5 |
| C%11(COC1=CC2=CC=CC=C2C=C1OC)=O.CC(C)C[CH](C%10=O)N%11.CC[CH](C)[CH](C(O)=O)N%10                 | 15.3_6 |
| C%11(COC1=CC2=CC=CC=C2C=C1OC)=O.CC(C)C[CH](C%10=O)N%11.CSCC[CH](C(O)=O)N%10                      | 15.3_7 |
| C%11(COC1=CC2=CC=CC=C2C=C1OC)=O.CC(C)C[CH](C%10=O)N%11.OC(C=C1)=CC=C1C[CH](C(O)=O)N%10           | 15.3_8 |
| C%11(COC1=CC2=CC=CC=C2C=C1OC)=O.CC(C)C[CH](C%10=O)N%11.O=C(O)[CH](CC1=C(F)C(F)=C(F)C(F)=C1F)N%10 | 15.3_9 |
| C%11(COC1=CC2=CC=CC=C2C=C1OC)=O.C[CH](C%10=O)N%11.O=C(O)CN%10                                    | 15.4_1 |
| C%11(COC1=CC2=CC=CC=C2C=C1OC)=O.C[CH](C%10=O)N%11.CC(C)[CH](C(O)=O)N%10                          | 15.4_2 |
| C%11(COC1=CC2=CC=CC=C2C=C1OC)=O.C[CH](C%10=O)N%11.CC(C)C[CH](C(O)=O)N%10                         | 15.4_3 |
| C%11(COC1=CC2=CC=CC=C2C=C1OC)=O.C[CH](C%10=O)N%11.C[CH](C(O)=O)N%10                              | 15.4_4 |
| C%11(COC1=CC2=CC=CC=C2C=C1OC)=O.C[CH](C%10=O)N%11.O=C(O)[CH](CC1=CC=CC=C1)N%10                   | 15.4_5 |
| C%11(COC1=CC2=CC=CC=C2C=C1OC)=O.C[CH](C%10=O)N%11.CC[CH](C)[CH](C(O)=O)N%10                      | 15.4_6 |
| C%11(COC1=CC2=CC=CC=C2C=C1OC)=O.C[CH](C%10=O)N%11.CSCC[CH](C(O)=O)N%10                           | 15.4_7 |
| C%11(COC1=CC2=CC=CC=C2C=C1OC)=O.C[CH](C%10=O)N%11.OC(C=C1)=CC=C1C[CH](C(O)=O)N%10                | 15.4_8 |
| C%11(COC1=CC2=CC=CC=C2C=C1OC)=O.C[CH](C%10=O)N%11.O=C(O)[CH](CC1=C(F)C(F)=C(F)C(F)=C1F)N%10      | 15.4_9 |
| C%11(COC1=CC2=CC=CC=C2C=C1OC)=O.O=C%10[CH](CC1=CC=CC=C1)N%11.O=C(O)CN%10                         | 15.5_1 |
| C%11(COC1=CC2=CC=CC=C2C=C1OC)=O.O=C%10[CH](CC1=CC=CC=C1)N%11.CC(C)[CH](C(O)=O)N%10               | 15.5_2 |
| C%11(COC1=CC2=CC=CC=C2C=C1OC)=O.O=C%10[CH](CC1=CC=CC=C1)N%11.CC(C)C[CH](C(O)=O)N%10              | 15.5_3 |
| C%11(COC1=CC2=CC=CC=C2C=C1OC)=O.O=C%10[CH](CC1=CC=CC=C1)N%11.C[CH](C(O)=O)N%10                   | 15.5_4 |
| C%11(COC1=CC2=CC=CC=C2C=C1OC)=O.O=C%10[CH](CC1=CC=CC=C1)N%11.O=C(O)[CH](CC1=CC=CC=C1)N%10        | 15.5_5 |
| C%11(COC1=CC2=CC=CC=C2C=C1OC)=O.O=C%10[CH](CC1=CC=CC=C1)N%11.CC[CH](C)[CH](C(O)=O)N%10           | 15.5_6 |

|                                                                                                        |        |
|--------------------------------------------------------------------------------------------------------|--------|
| C%11(COC1=CC2=CC=CC=C2C=C1OC)=O.O=C%10[CH](CC1=CC=CC=C1)N%11.CSCC[CH](C(O)=O)N%10                      | 15.5_7 |
| C%11(COC1=CC2=CC=CC=C2C=C1OC)=O.O=C%10[CH](CC1=CC=CC=C1)N%11.OC(C=C1)=CC=C1C[CH](C(O)=O)N%10           | 15.5_8 |
| C%11(COC1=CC2=CC=CC=C2C=C1OC)=O.O=C%10[CH](CC1=CC=CC=C1)N%11.O=C(O)[CH](CC1=C(F)C(F)=C(F)C(F)=C1F)N%10 | 15.5_9 |
| C%11(COC1=CC2=CC=CC=C2C=C1OC)=O.CC[CH](C)[CH](C%10=O)N%11.O=C(O)CN%10                                  | 15.6_1 |
| C%11(COC1=CC2=CC=CC=C2C=C1OC)=O.CC[CH](C)[CH](C%10=O)N%11.CC(C)[CH](C(O)=O)N%10                        | 15.6_2 |
| C%11(COC1=CC2=CC=CC=C2C=C1OC)=O.CC[CH](C)[CH](C%10=O)N%11.CC(C)C[CH](C(O)=O)N%10                       | 15.6_3 |
| C%11(COC1=CC2=CC=CC=C2C=C1OC)=O.CC[CH](C)[CH](C%10=O)N%11.C[CH](C(O)=O)N%10                            | 15.6_4 |
| C%11(COC1=CC2=CC=CC=C2C=C1OC)=O.CC[CH](C)[CH](C%10=O)N%11.O=C(O)[CH](CC1=CC=CC=C1)N%10                 | 15.6_5 |
| C%11(COC1=CC2=CC=CC=C2C=C1OC)=O.CC[CH](C)[CH](C%10=O)N%11.CC[CH](C)[CH](C(O)=O)N%10                    | 15.6_6 |
| C%11(COC1=CC2=CC=CC=C2C=C1OC)=O.CC[CH](C)[CH](C%10=O)N%11.CSCC[CH](C(O)=O)N%10                         | 15.6_7 |
| C%11(COC1=CC2=CC=CC=C2C=C1OC)=O.CC[CH](C)[CH](C%10=O)N%11.OC(C=C1)=CC=C1C[CH](C(O)=O)N%10              | 15.6_8 |
| C%11(COC1=CC2=CC=CC=C2C=C1OC)=O.CC[CH](C)[CH](C%10=O)N%11.O=C(O)[CH](CC1=C(F)C(F)=C(F)C(F)=C1F)N%10    | 15.6_9 |
| C%11(COC1=CC2=CC=CC=C2C=C1OC)=O.CSCC[CH](C%10=O)N%11.O=C(O)CN%10                                       | 15.7_1 |
| C%11(COC1=CC2=CC=CC=C2C=C1OC)=O.CSCC[CH](C%10=O)N%11.CC(C)[CH](C(O)=O)N%10                             | 15.7_2 |
| C%11(COC1=CC2=CC=CC=C2C=C1OC)=O.CSCC[CH](C%10=O)N%11.CC(C)C[CH](C(O)=O)N%10                            | 15.7_3 |
| C%11(COC1=CC2=CC=CC=C2C=C1OC)=O.CSCC[CH](C%10=O)N%11.C[CH](C(O)=O)N%10                                 | 15.7_4 |
| C%11(COC1=CC2=CC=CC=C2C=C1OC)=O.CSCC[CH](C%10=O)N%11.O=C(O)[CH](CC1=CC=CC=C1)N%10                      | 15.7_5 |
| C%11(COC1=CC2=CC=CC=C2C=C1OC)=O.CSCC[CH](C%10=O)N%11.CC[CH](C)[CH](C(O)=O)N%10                         | 15.7_6 |
| C%11(COC1=CC2=CC=CC=C2C=C1OC)=O.CSCC[CH](C%10=O)N%11.CSCC[CH](C(O)=O)N%10                              | 15.7_7 |
| C%11(COC1=CC2=CC=CC=C2C=C1OC)=O.CSCC[CH](C%10=O)N%11.OC(C=C1)=CC=C1C[CH](C(O)=O)N%10                   | 15.7_8 |
| C%11(COC1=CC2=CC=CC=C2C=C1OC)=O.CSCC[CH](C%10=O)N%11.O=C(O)[CH](CC1=C(F)C(F)=C(F)C(F)=C1F)N%10         | 15.7_9 |
| C%11(COC1=CC2=CC=CC=C2C=C1OC)=O.OC(C=C1)=CC=C1C[CH](C%10=O)N%11.O=C(O)CN%10                            | 15.8_1 |
| C%11(COC1=CC2=CC=CC=C2C=C1OC)=O.OC(C=C1)=CC=C1C[CH](C%10=O)N%11.CC(C)[CH](C(O)=O)N%10                  | 15.8_2 |
| C%11(COC1=CC2=CC=CC=C2C=C1OC)=O.OC(C=C1)=CC=C1C[CH](C%10=O)N%11.CC(C)C[CH](C(O)=O)N%10                 | 15.8_3 |
| C%11(COC1=CC2=CC=CC=C2C=C1OC)=O.OC(C=C1)=CC=C1C[CH](C%10=O)N%11.C[CH](C(O)=O)N%10                      | 15.8_4 |
| C%11(COC1=CC2=CC=CC=C2C=C1OC)=O.OC(C=C1)=CC=C1C[CH](C%10=O)N%11.O=C(O)[CH](CC1=CC=CC=C1)N%10           | 15.8_5 |



|                                                                                                            |        |
|------------------------------------------------------------------------------------------------------------|--------|
| C%11(COC1=CC2=CC=CC=C2C=C1OC)=O.O=C(C=C1)=CC=C1C[CH](C%10=O)N%11.CC[CH](C)[CH](C(O)=O)N%10                 | 15.8_6 |
| C%11(COC1=CC2=CC=CC=C2C=C1OC)=O.O=C(C=C1)=CC=C1C[CH](C%10=O)N%11.CSCC[CH](C(O)=O)N%10                      | 15.8_7 |
| C%11(COC1=CC2=CC=CC=C2C=C1OC)=O.O=C(C=C1)=CC=C1C[CH](C%10=O)N%11.O=C(C=C1)=CC=C1C[CH](C(O)=O)N%10          | 15.8_8 |
| C%11(COC1=CC2=CC=CC=C2C=C1OC)=O.O=C(C=C1)=CC=C1C[CH](C%10=O)N%11.O=C(O)[CH](CC1=C(F)C(F)=C(F)C(F)=C1F)N%10 | 15.8_9 |
| C%10(COC1=CC2=CC=CC=C2C=C1OC)=O.O=C(O)CN%10                                                                | 15.9_1 |
| C%10(COC1=CC2=CC=CC=C2C=C1OC)=O.CC(C)[CH](C(O)=O)N%10                                                      | 15.9_2 |
| C%10(COC1=CC2=CC=CC=C2C=C1OC)=O.CC(C)C[CH](C(O)=O)N%10                                                     | 15.9_3 |
| C%10(COC1=CC2=CC=CC=C2C=C1OC)=O.C[CH](C(O)=O)N%10                                                          | 15.9_4 |
| C%10(COC1=CC2=CC=CC=C2C=C1OC)=O.O=C(O)[CH](CC1=CC=CC=C1)N%10                                               | 15.9_5 |
| C%10(COC1=CC2=CC=CC=C2C=C1OC)=O.CC[CH](C)[CH](C(O)=O)N%10                                                  | 15.9_6 |
| C%10(COC1=CC2=CC=CC=C2C=C1OC)=O.CSCC[CH](C(O)=O)N%10                                                       | 15.9_7 |
| C%10(COC1=CC2=CC=CC=C2C=C1OC)=O.O=C(C=C1)=CC=C1C[CH](C(O)=O)N%10                                           | 15.9_8 |
| C%10(COC1=CC2=CC=CC=C2C=C1OC)=O.O=C(O)[CH](CC1=C(F)C(F)=C(F)C(F)=C1F)N%10                                  | 15.9_9 |
| C%11(COC1=CC2=CC(OC)=CC=C2C=C1)=O.O=C%10CN%11.O=C(O)CN%10                                                  | 16.1_1 |
| C%11(COC1=CC2=CC(OC)=CC=C2C=C1)=O.O=C%10CN%11.CC(C)[CH](C(O)=O)N%10                                        | 16.1_2 |
| C%11(COC1=CC2=CC(OC)=CC=C2C=C1)=O.O=C%10CN%11.CC(C)C[CH](C(O)=O)N%10                                       | 16.1_3 |
| C%11(COC1=CC2=CC(OC)=CC=C2C=C1)=O.O=C%10CN%11.C[CH](C(O)=O)N%10                                            | 16.1_4 |
| C%11(COC1=CC2=CC(OC)=CC=C2C=C1)=O.O=C%10CN%11.O=C(O)[CH](CC1=CC=CC=C1)N%10                                 | 16.1_5 |
| C%11(COC1=CC2=CC(OC)=CC=C2C=C1)=O.O=C%10CN%11.CC[CH](C)[CH](C(O)=O)N%10                                    | 16.1_6 |
| C%11(COC1=CC2=CC(OC)=CC=C2C=C1)=O.O=C%10CN%11.CSCC[CH](C(O)=O)N%10                                         | 16.1_7 |
| C%11(COC1=CC2=CC(OC)=CC=C2C=C1)=O.O=C%10CN%11.O=C(C=C1)=CC=C1C[CH](C(O)=O)N%10                             | 16.1_8 |
| C%11(COC1=CC2=CC(OC)=CC=C2C=C1)=O.O=C%10CN%11.O=C(O)[CH](CC1=C(F)C(F)=C(F)C(F)=C1F)N%10                    | 16.1_9 |
| C%11(COC1=CC2=CC(OC)=CC=C2C=C1)=O.CC(C)[CH](C%10=O)N%11.O=C(O)CN%10                                        | 16.2_1 |
| C%11(COC1=CC2=CC(OC)=CC=C2C=C1)=O.CC(C)[CH](C%10=O)N%11.CC(C)[CH](C(O)=O)N%10                              | 16.2_2 |
| C%11(COC1=CC2=CC(OC)=CC=C2C=C1)=O.CC(C)[CH](C%10=O)N%11.CC(C)C[CH](C(O)=O)N%10                             | 16.2_3 |
| C%11(COC1=CC2=CC(OC)=CC=C2C=C1)=O.CC(C)[CH](C%10=O)N%11.C[CH](C(O)=O)N%10                                  | 16.2_4 |
| C%11(COC1=CC2=CC(OC)=CC=C2C=C1)=O.CC(C)[CH](C%10=O)N%11.O=C(O)[CH](CC1=CC=CC=C1)N%10                       | 16.2_5 |
| C%11(COC1=CC2=CC(OC)=CC=C2C=C1)=O.CC(C)[CH](C%10=O)N%11.CC[CH](C)[CH](C(O)=O)N%10                          | 16.2_6 |
| C%11(COC1=CC2=CC(OC)=CC=C2C=C1)=O.CC(C)[CH](C%10=O)N%11.CSCC[CH](C(O)=O)N%10                               | 16.2_7 |
| C%11(COC1=CC2=CC(OC)=CC=C2C=C1)=O.CC(C)[CH](C%10=O)N%11.O=C(C=C1)=CC=C1C[CH](C(O)=O)N%10                   | 16.2_8 |
| C%11(COC1=CC2=CC(OC)=CC=C2C=C1)=O.CC(C)[CH](C%10=O)N%11.O=C(O)[CH](CC1=C(F)C(F)=C(F)C(F)=C1F)N%10          | 16.2_9 |
| C%11(COC1=CC2=CC(OC)=CC=C2C=C1)=O.CC(C)C[CH](C%10=O)N%11.O=C(O)CN%10                                       | 16.3_1 |
| C%11(COC1=CC2=CC(OC)=CC=C2C=C1)=O.CC(C)C[CH](C%10=O)N%11.CC(C)[CH](C(O)=O)N%10                             | 16.3_2 |

|                                                                                                          |        |
|----------------------------------------------------------------------------------------------------------|--------|
| N%10                                                                                                     |        |
| C%11(COC1=CC2=CC(OC)=CC=C2C=C1)=O.CC(C)C[CH](C%10=O)N%11.CC(C)C[CH](C(O)=O)N%10                          | 16.3_3 |
| C%11(COC1=CC2=CC(OC)=CC=C2C=C1)=O.CC(C)C[CH](C%10=O)N%11.C[CH](C(O)=O)N%10                               | 16.3_4 |
| C%11(COC1=CC2=CC(OC)=CC=C2C=C1)=O.CC(C)C[CH](C%10=O)N%11.O=C(O)[CH](CC1=CC=CC=C1)N%10                    | 16.3_5 |
| C%11(COC1=CC2=CC(OC)=CC=C2C=C1)=O.CC(C)C[CH](C%10=O)N%11.CC[CH](C)[CH](C(O)=O)N%10                       | 16.3_6 |
| C%11(COC1=CC2=CC(OC)=CC=C2C=C1)=O.CC(C)C[CH](C%10=O)N%11.CSCC[CH](C(O)=O)N%10                            | 16.3_7 |
| C%11(COC1=CC2=CC(OC)=CC=C2C=C1)=O.CC(C)C[CH](C%10=O)N%11.OC(C=C1)=CC=C1C[CH](C(O)=O)N%10                 | 16.3_8 |
| C%11(COC1=CC2=CC(OC)=CC=C2C=C1)=O.CC(C)C[CH](C%10=O)N%11.O=C(O)[CH](CC1=CC(F)C(F)=C(F)C(F)=C1F)N%10      | 16.3_9 |
| C%11(COC1=CC2=CC(OC)=CC=C2C=C1)=O.C[CH](C%10=O)N%11.O=C(O)CN%10                                          | 16.4_1 |
| C%11(COC1=CC2=CC(OC)=CC=C2C=C1)=O.C[CH](C%10=O)N%11.CC(C)[CH](C(O)=O)N%10                                | 16.4_2 |
| C%11(COC1=CC2=CC(OC)=CC=C2C=C1)=O.C[CH](C%10=O)N%11.CC(C)C[CH](C(O)=O)N%10                               | 16.4_3 |
| C%11(COC1=CC2=CC(OC)=CC=C2C=C1)=O.C[CH](C%10=O)N%11.C[CH](C(O)=O)N%10                                    | 16.4_4 |
| C%11(COC1=CC2=CC(OC)=CC=C2C=C1)=O.C[CH](C%10=O)N%11.O=C(O)[CH](CC1=CC=CC=C1)N%10                         | 16.4_5 |
| C%11(COC1=CC2=CC(OC)=CC=C2C=C1)=O.C[CH](C%10=O)N%11.CC[CH](C)[CH](C(O)=O)N%10                            | 16.4_6 |
| C%11(COC1=CC2=CC(OC)=CC=C2C=C1)=O.C[CH](C%10=O)N%11.CSCC[CH](C(O)=O)N%10                                 | 16.4_7 |
| C%11(COC1=CC2=CC(OC)=CC=C2C=C1)=O.C[CH](C%10=O)N%11.OC(C=C1)=CC=C1C[CH](C(O)=O)N%10                      | 16.4_8 |
| C%11(COC1=CC2=CC(OC)=CC=C2C=C1)=O.C[CH](C%10=O)N%11.O=C(O)[CH](CC1=C(F)C(F)=C(F)C(F)=C1F)N%10            | 16.4_9 |
| C%11(COC1=CC2=CC(OC)=CC=C2C=C1)=O.O=C%10[CH](CC1=CC=CC=C1)N%11.O=C(O)CN%10                               | 16.5_1 |
| C%11(COC1=CC2=CC(OC)=CC=C2C=C1)=O.O=C%10[CH](CC1=CC=CC=C1)N%11.CC(C)[CH](C(O)=O)N%10                     | 16.5_2 |
| C%11(COC1=CC2=CC(OC)=CC=C2C=C1)=O.O=C%10[CH](CC1=CC=CC=C1)N%11.CC(C)C[CH](C(O)=O)N%10                    | 16.5_3 |
| C%11(COC1=CC2=CC(OC)=CC=C2C=C1)=O.O=C%10[CH](CC1=CC=CC=C1)N%11.C[CH](C(O)=O)N%10                         | 16.5_4 |
| C%11(COC1=CC2=CC(OC)=CC=C2C=C1)=O.O=C%10[CH](CC1=CC=CC=C1)N%11.O=C(O)[CH](CC1=CC=CC=C1)N%10              | 16.5_5 |
| C%11(COC1=CC2=CC(OC)=CC=C2C=C1)=O.O=C%10[CH](CC1=CC=CC=C1)N%11.CC[CH](C)[CH](C(O)=O)N%10                 | 16.5_6 |
| C%11(COC1=CC2=CC(OC)=CC=C2C=C1)=O.O=C%10[CH](CC1=CC=CC=C1)N%11.CSCC[CH](C(O)=O)N%10                      | 16.5_7 |
| C%11(COC1=CC2=CC(OC)=CC=C2C=C1)=O.O=C%10[CH](CC1=CC=CC=C1)N%11.OC(C=C1)=CC=C1C[CH](C(O)=O)N%10           | 16.5_8 |
| C%11(COC1=CC2=CC(OC)=CC=C2C=C1)=O.O=C%10[CH](CC1=CC=CC=C1)N%11.O=C(O)[CH](CC1=C(F)C(F)=C(F)C(F)=C1F)N%10 | 16.5_9 |
| C%11(COC1=CC2=CC(OC)=CC=C2C=C1)=O.CC[CH](C)[CH](C%10=O)N%11.O=C(O)CN%10                                  | 16.6_1 |

|                                                                                                       |        |
|-------------------------------------------------------------------------------------------------------|--------|
| C%11(COC1=CC2=CC(OC)=CC=C2C=C1)=O.CC[CH](C)[CH](C%10=O)N%11.CC(C)[CH](C(O)=O)N%10                     | 16.6_2 |
| C%11(COC1=CC2=CC(OC)=CC=C2C=C1)=O.CC[CH](C)[CH](C%10=O)N%11.CC(C)C[CH](C(O)=O)N%10                    | 16.6_3 |
| C%11(COC1=CC2=CC(OC)=CC=C2C=C1)=O.CC[CH](C)[CH](C%10=O)N%11.C[CH](C(O)=O)N%10                         | 16.6_4 |
| C%11(COC1=CC2=CC(OC)=CC=C2C=C1)=O.CC[CH](C)[CH](C%10=O)N%11.O=C(O)[CH](CC1=CC=CC=C1)N%10              | 16.6_5 |
| C%11(COC1=CC2=CC(OC)=CC=C2C=C1)=O.CC[CH](C)[CH](C%10=O)N%11.CC[CH](C)[CH](C(O)=O)N%10                 | 16.6_6 |
| C%11(COC1=CC2=CC(OC)=CC=C2C=C1)=O.CC[CH](C)[CH](C%10=O)N%11.CSCC[CH](C(O)=O)N%10                      | 16.6_7 |
| C%11(COC1=CC2=CC(OC)=CC=C2C=C1)=O.CC[CH](C)[CH](C%10=O)N%11.OC(C=C1)=CC=C1C[CH](C(O)=O)N%10           | 16.6_8 |
| C%11(COC1=CC2=CC(OC)=CC=C2C=C1)=O.CC[CH](C)[CH](C%10=O)N%11.O=C(O)[CH](CC1=C(F)C(F)=C(F)C(F)=C1F)N%10 | 16.6_9 |
| C%11(COC1=CC2=CC(OC)=CC=C2C=C1)=O.CSCC[CH](C%10=O)N%11.O=C(O)CN%10                                    | 16.7_1 |
| C%11(COC1=CC2=CC(OC)=CC=C2C=C1)=O.CSCC[CH](C%10=O)N%11.CC(C)[CH](C(O)=O)N%10                          | 16.7_2 |
| C%11(COC1=CC2=CC(OC)=CC=C2C=C1)=O.CSCC[CH](C%10=O)N%11.CC(C)C[CH](C(O)=O)N%10                         | 16.7_3 |
| C%11(COC1=CC2=CC(OC)=CC=C2C=C1)=O.CSCC[CH](C%10=O)N%11.C[CH](C(O)=O)N%10                              | 16.7_4 |
| C%11(COC1=CC2=CC(OC)=CC=C2C=C1)=O.CSCC[CH](C%10=O)N%11.O=C(O)[CH](CC1=CC=CC=C1)N%10                   | 16.7_5 |
| C%11(COC1=CC2=CC(OC)=CC=C2C=C1)=O.CSCC[CH](C%10=O)N%11.CC[CH](C)[CH](C(O)=O)N%10                      | 16.7_6 |
| C%11(COC1=CC2=CC(OC)=CC=C2C=C1)=O.CSCC[CH](C%10=O)N%11.CSCC[CH](C(O)=O)N%10                           | 16.7_7 |
| C%11(COC1=CC2=CC(OC)=CC=C2C=C1)=O.CSCC[CH](C%10=O)N%11.OC(C=C1)=CC=C1C[CH](C(O)=O)N%10                | 16.7_8 |
| C%11(COC1=CC2=CC(OC)=CC=C2C=C1)=O.CSCC[CH](C%10=O)N%11.O=C(O)[CH](CC1=C(F)C(F)=C(F)C(F)=C1F)N%10      | 16.7_9 |
| C%11(COC1=CC2=CC(OC)=CC=C2C=C1)=O.OC(C=C1)=CC=C1C[CH](C%10=O)N%11.O=C(O)CN%10                         | 16.8_1 |
| C%11(COC1=CC2=CC(OC)=CC=C2C=C1)=O.OC(C=C1)=CC=C1C[CH](C%10=O)N%11.CC(C)[CH](C(O)=O)N%10               | 16.8_2 |
| C%11(COC1=CC2=CC(OC)=CC=C2C=C1)=O.OC(C=C1)=CC=C1C[CH](C%10=O)N%11.CC(C)C[CH](C(O)=O)N%10              | 16.8_3 |
| C%11(COC1=CC2=CC(OC)=CC=C2C=C1)=O.OC(C=C1)=CC=C1C[CH](C%10=O)N%11.C[CH](C(O)=O)N%10                   | 16.8_4 |
| C%11(COC1=CC2=CC(OC)=CC=C2C=C1)=O.OC(C=C1)=CC=C1C[CH](C%10=O)N%11.O=C(O)[CH](CC1=CC=CC=C1)N%10        | 16.8_5 |
| C%11(COC1=CC2=CC(OC)=CC=C2C=C1)=O.OC(C=C1)=CC=C1C[CH](C%10=O)N%11.CC[CH](C)[CH](C(O)=O)N%10           | 16.8_6 |
| C%11(COC1=CC2=CC(OC)=CC=C2C=C1)=O.OC(C=C1)=CC=C1C[CH](C%10=O)N%11.CSCC[CH](C(O)=O)N%10                | 16.8_7 |
| C%11(COC1=CC2=CC(OC)=CC=C2C=C1)=O.OC(C=C1)=CC=C1C[CH](C%10=O)N%11.OC(C=C1)=CC=C1C[CH](C(O)=O)N%10     | 16.8_8 |
| C%11(COC1=CC2=CC(OC)=CC=C2C=C1)=O.OC(C=C1)=CC=C1C[CH](C%10=O)N%11.O=C(O)                              | 16.8_9 |

|                                                                                               |        |
|-----------------------------------------------------------------------------------------------|--------|
| [CH](CC1=C(F)C(F)=C(F)C(F)=C1F)N%10                                                           |        |
| C%10(COC1=CC2=CC(OC)=CC=C2C=C1)=O.O=C(O)CN%10                                                 | 16.9_1 |
| C%10(COC1=CC2=CC(OC)=CC=C2C=C1)=O.CC(C)[CH](C(O)=O)N%10                                       | 16.9_2 |
| C%10(COC1=CC2=CC(OC)=CC=C2C=C1)=O.CC(C)C[CH](C(O)=O)N%10                                      | 16.9_3 |
| C%10(COC1=CC2=CC(OC)=CC=C2C=C1)=O.C[CH](C(O)=O)N%10                                           | 16.9_4 |
| C%10(COC1=CC2=CC(OC)=CC=C2C=C1)=O.O=C(O)[CH](CC1=CC=CC=C1)N%10                                | 16.9_5 |
| C%10(COC1=CC2=CC(OC)=CC=C2C=C1)=O.CC[CH](C)[CH](C(O)=O)N%10                                   | 16.9_6 |
| C%10(COC1=CC2=CC(OC)=CC=C2C=C1)=O.CSCC[CH](C(O)=O)N%10                                        | 16.9_7 |
| C%10(COC1=CC2=CC(OC)=CC=C2C=C1)=O.OC(C=C1)=CC=C1C[CH](C(O)=O)N%10                             | 16.9_8 |
| C%10(COC1=CC2=CC(OC)=CC=C2C=C1)=O.O=C(O)[CH](CC1=C(F)C(F)=C(F)C(F)=C1F)N%10                   | 16.9_9 |
| C%11(COC1=CC2=CC=CC=C2C=C1)=O.O=C%10CN%11.O=C(O)CN%10                                         | 17.1_1 |
| C%11(COC1=CC2=CC=CC=C2C=C1)=O.O=C%10CN%11.CC(C)[CH](C(O)=O)N%10                               | 17.1_2 |
| C%11(COC1=CC2=CC=CC=C2C=C1)=O.O=C%10CN%11.CC(C)C[CH](C(O)=O)N%10                              | 17.1_3 |
| C%11(COC1=CC2=CC=CC=C2C=C1)=O.O=C%10CN%11.C[CH](C(O)=O)N%10                                   | 17.1_4 |
| C%11(COC1=CC2=CC=CC=C2C=C1)=O.O=C%10CN%11.O=C(O)[CH](CC1=CC=CC=C1)N%10                        | 17.1_5 |
| C%11(COC1=CC2=CC=CC=C2C=C1)=O.O=C%10CN%11.CC[CH](C)[CH](C(O)=O)N%10                           | 17.1_6 |
| C%11(COC1=CC2=CC=CC=C2C=C1)=O.O=C%10CN%11.CSCC[CH](C(O)=O)N%10                                | 17.1_7 |
| C%11(COC1=CC2=CC=CC=C2C=C1)=O.O=C%10CN%11.OC(C=C1)=CC=C1C[CH](C(O)=O)N%10                     | 17.1_8 |
| C%11(COC1=CC2=CC=CC=C2C=C1)=O.O=C%10CN%11.O=C(O)[CH](CC1=C(F)C(F)=C(F)C(F)=C1F)N%10           | 17.1_9 |
| C%11(COC1=CC2=CC=CC=C2C=C1)=O.CC(C)[CH](C%10=O)N%11.O=C(O)CN%10                               | 17.2_1 |
| C%11(COC1=CC2=CC=CC=C2C=C1)=O.CC(C)[CH](C%10=O)N%11.CC(C)[CH](C(O)=O)N%10                     | 17.2_2 |
| C%11(COC1=CC2=CC=CC=C2C=C1)=O.CC(C)[CH](C%10=O)N%11.CC(C)C[CH](C(O)=O)N%10                    | 17.2_3 |
| C%11(COC1=CC2=CC=CC=C2C=C1)=O.CC(C)[CH](C%10=O)N%11.C[CH](C(O)=O)N%10                         | 17.2_4 |
| C%11(COC1=CC2=CC=CC=C2C=C1)=O.CC(C)[CH](C%10=O)N%11.O=C(O)[CH](CC1=CC=CC=C1)N%10              | 17.2_5 |
| C%11(COC1=CC2=CC=CC=C2C=C1)=O.CC(C)[CH](C%10=O)N%11.CC[CH](C)[CH](C(O)=O)N%10                 | 17.2_6 |
| C%11(COC1=CC2=CC=CC=C2C=C1)=O.CC(C)[CH](C%10=O)N%11.CSCC[CH](C(O)=O)N%10                      | 17.2_7 |
| C%11(COC1=CC2=CC=CC=C2C=C1)=O.CC(C)[CH](C%10=O)N%11.OC(C=C1)=CC=C1C[CH](C(O)=O)N%10           | 17.2_8 |
| C%11(COC1=CC2=CC=CC=C2C=C1)=O.CC(C)[CH](C%10=O)N%11.O=C(O)[CH](CC1=C(F)C(F)=C(F)C(F)=C1F)N%10 | 17.2_9 |
| C%11(COC1=CC2=CC=CC=C2C=C1)=O.CC(C)C[CH](C%10=O)N%11.O=C(O)CN%10                              | 17.3_1 |
| C%11(COC1=CC2=CC=CC=C2C=C1)=O.CC(C)C[CH](C%10=O)N%11.CC(C)[CH](C(O)=O)N%10                    | 17.3_2 |
| C%11(COC1=CC2=CC=CC=C2C=C1)=O.CC(C)C[CH](C%10=O)N%11.CC(C)C[CH](C(O)=O)N%10                   | 17.3_3 |
| C%11(COC1=CC2=CC=CC=C2C=C1)=O.CC(C)C[CH](C%10=O)N%11.C[CH](C(O)=O)N%10                        | 17.3_4 |
| C%11(COC1=CC2=CC=CC=C2C=C1)=O.CC(C)C[CH](C%10=O)N%11.O=C(O)[CH](CC1=CC=CC=C1)N%10             | 17.3_5 |
| C%11(COC1=CC2=CC=CC=C2C=C1)=O.CC(C)C[CH](C%10=O)N%11.CC[CH](C)[CH](C(O)=O)N%10                | 17.3_6 |
| C%11(COC1=CC2=CC=CC=C2C=C1)=O.CC(C)C[CH](C%10=O)N%11.CSCC[CH](C(O)=O)N%10                     | 17.3_7 |

|                                                                                                      |        |
|------------------------------------------------------------------------------------------------------|--------|
| 0                                                                                                    |        |
| C%11(COC1=CC2=CC=CC=C2C=C1)=O.CC(C)C[CH](C%10=O)N%11.OC(C=C1)=CC=C1C[CH](C(O)=O)N%10                 | 17.3_8 |
| C%11(COC1=CC2=CC=CC=C2C=C1)=O.CC(C)C[CH](C%10=O)N%11.O=C(O)[CH](CC1=C(F)C(F)=C(F)C(F)=C1F)N%10       | 17.3_9 |
| C%11(COC1=CC2=CC=CC=C2C=C1)=O.C[CH](C%10=O)N%11.O=C(O)CN%10                                          | 17.4_1 |
| C%11(COC1=CC2=CC=CC=C2C=C1)=O.C[CH](C%10=O)N%11.CC(C)[CH](C(O)=O)N%10                                | 17.4_2 |
| C%11(COC1=CC2=CC=CC=C2C=C1)=O.C[CH](C%10=O)N%11.CC(C)C[CH](C(O)=O)N%10                               | 17.4_3 |
| C%11(COC1=CC2=CC=CC=C2C=C1)=O.C[CH](C%10=O)N%11.C[CH](C(O)=O)N%10                                    | 17.4_4 |
| C%11(COC1=CC2=CC=CC=C2C=C1)=O.C[CH](C%10=O)N%11.O=C(O)[CH](CC1=CC=CC=C1)N%10                         | 17.4_5 |
| C%11(COC1=CC2=CC=CC=C2C=C1)=O.C[CH](C%10=O)N%11.CC[CH](C)[CH](C(O)=O)N%10                            | 17.4_6 |
| C%11(COC1=CC2=CC=CC=C2C=C1)=O.C[CH](C%10=O)N%11.CSCC[CH](C(O)=O)N%10                                 | 17.4_7 |
| C%11(COC1=CC2=CC=CC=C2C=C1)=O.C[CH](C%10=O)N%11.OC(C=C1)=CC=C1C[CH](C(O)=O)N%10                      | 17.4_8 |
| C%11(COC1=CC2=CC=CC=C2C=C1)=O.C[CH](C%10=O)N%11.O=C(O)[CH](CC1=C(F)C(F)=C(F)C(F)=C1F)N%10            | 17.4_9 |
| C%11(COC1=CC2=CC=CC=C2C=C1)=O.O=C%10[CH](CC1=CC=CC=C1)N%11.O=C(O)CN%10                               | 17.5_1 |
| C%11(COC1=CC2=CC=CC=C2C=C1)=O.O=C%10[CH](CC1=CC=CC=C1)N%11.CC(C)[CH](C(O)=O)N%10                     | 17.5_2 |
| C%11(COC1=CC2=CC=CC=C2C=C1)=O.O=C%10[CH](CC1=CC=CC=C1)N%11.CC(C)C[CH](C(O)=O)N%10                    | 17.5_3 |
| C%11(COC1=CC2=CC=CC=C2C=C1)=O.O=C%10[CH](CC1=CC=CC=C1)N%11.C[CH](C(O)=O)N%10                         | 17.5_4 |
| C%11(COC1=CC2=CC=CC=C2C=C1)=O.O=C%10[CH](CC1=CC=CC=C1)N%11.O=C(O)[CH](CC1=CC=CC=C1)N%10              | 17.5_5 |
| C%11(COC1=CC2=CC=CC=C2C=C1)=O.O=C%10[CH](CC1=CC=CC=C1)N%11.CC[CH](C)[CH](C(O)=O)N%10                 | 17.5_6 |
| C%11(COC1=CC2=CC=CC=C2C=C1)=O.O=C%10[CH](CC1=CC=CC=C1)N%11.CSCC[CH](C(O)=O)N%10                      | 17.5_7 |
| C%11(COC1=CC2=CC=CC=C2C=C1)=O.O=C%10[CH](CC1=CC=CC=C1)N%11.OC(C=C1)=CC=C1C[CH](C(O)=O)N%10           | 17.5_8 |
| C%11(COC1=CC2=CC=CC=C2C=C1)=O.O=C%10[CH](CC1=CC=CC=C1)N%11.O=C(O)[CH](CC1=C(F)C(F)=C(F)C(F)=C1F)N%10 | 17.5_9 |
| C%11(COC1=CC2=CC=CC=C2C=C1)=O.CC[CH](C)[CH](C%10=O)N%11.O=C(O)CN%10                                  | 17.6_1 |
| C%11(COC1=CC2=CC=CC=C2C=C1)=O.CC[CH](C)[CH](C%10=O)N%11.CC(C)[CH](C(O)=O)N%10                        | 17.6_2 |
| C%11(COC1=CC2=CC=CC=C2C=C1)=O.CC[CH](C)[CH](C%10=O)N%11.CC(C)C[CH](C(O)=O)N%10                       | 17.6_3 |
| C%11(COC1=CC2=CC=CC=C2C=C1)=O.CC[CH](C)[CH](C%10=O)N%11.C[CH](C(O)=O)N%10                            | 17.6_4 |
| C%11(COC1=CC2=CC=CC=C2C=C1)=O.CC[CH](C)[CH](C%10=O)N%11.O=C(O)[CH](CC1=CC=CC=C1)N%10                 | 17.6_5 |
| C%11(COC1=CC2=CC=CC=C2C=C1)=O.CC[CH](C)[CH](C%10=O)N%11.CC[CH](C)[CH](C(O)=O)N%10                    | 17.6_6 |
| C%11(COC1=CC2=CC=CC=C2C=C1)=O.CC[CH](C)[CH](C%10=O)N%11.CSCC[CH](C(O)=O)N%10                         | 17.6_7 |
| C%11(COC1=CC2=CC=CC=C2C=C1)=O.CC[CH](C)[CH](C%10=O)N%11.OC(C=C1)=CC=C1C[CH](C(O)=O)N%10              | 17.6_8 |

|                                                                                                         |        |
|---------------------------------------------------------------------------------------------------------|--------|
| C%11(COC1=CC2=CC=CC=C2C=C1)=O.CC[CH](C)[CH](C%10=O)N%11.O=C(O)[CH](CC1=C(F)C(F)=C(F)C(F)=C1F)N%10       | 17.6_9 |
| C%11(COC1=CC2=CC=CC=C2C=C1)=O.CSCC[CH](C%10=O)N%11.O=C(O)CN%10                                          | 17.7_1 |
| C%11(COC1=CC2=CC=CC=C2C=C1)=O.CSCC[CH](C%10=O)N%11.CC(C)[CH](C(O)=O)N%10                                | 17.7_2 |
| C%11(COC1=CC2=CC=CC=C2C=C1)=O.CSCC[CH](C%10=O)N%11.CC(C)C[CH](C(O)=O)N%10                               | 17.7_3 |
| C%11(COC1=CC2=CC=CC=C2C=C1)=O.CSCC[CH](C%10=O)N%11.C[CH](C(O)=O)N%10                                    | 17.7_4 |
| C%11(COC1=CC2=CC=CC=C2C=C1)=O.CSCC[CH](C%10=O)N%11.O=C(O)[CH](CC1=CC=CC=C1)N%10                         | 17.7_5 |
| C%11(COC1=CC2=CC=CC=C2C=C1)=O.CSCC[CH](C%10=O)N%11.CC[CH](C)[CH](C(O)=O)N%10                            | 17.7_6 |
| C%11(COC1=CC2=CC=CC=C2C=C1)=O.CSCC[CH](C%10=O)N%11.CSCC[CH](C(O)=O)N%10                                 | 17.7_7 |
| C%11(COC1=CC2=CC=CC=C2C=C1)=O.CSCC[CH](C%10=O)N%11.OC(C=C1)=CC=C1C[CH](C(O)=O)N%10                      | 17.7_8 |
| C%11(COC1=CC2=CC=CC=C2C=C1)=O.CSCC[CH](C%10=O)N%11.O=C(O)[CH](CC1=C(F)C(F)=C(F)C(F)=C1F)N%10            | 17.7_9 |
| C%11(COC1=CC2=CC=CC=C2C=C1)=O.OC(C=C1)=CC=C1C[CH](C%10=O)N%11.O=C(O)CN%10                               | 17.8_1 |
| C%11(COC1=CC2=CC=CC=C2C=C1)=O.OC(C=C1)=CC=C1C[CH](C%10=O)N%11.CC(C)[CH](C(O)=O)N%10                     | 17.8_2 |
| C%11(COC1=CC2=CC=CC=C2C=C1)=O.OC(C=C1)=CC=C1C[CH](C%10=O)N%11.CC(C)C[CH](C(O)=O)N%10                    | 17.8_3 |
| C%11(COC1=CC2=CC=CC=C2C=C1)=O.OC(C=C1)=CC=C1C[CH](C%10=O)N%11.C[CH](C(O)=O)N%10                         | 17.8_4 |
| C%11(COC1=CC2=CC=CC=C2C=C1)=O.OC(C=C1)=CC=C1C[CH](C%10=O)N%11.O=C(O)[CH](CC1=CC=CC=C1)N%10              | 17.8_5 |
| C%11(COC1=CC2=CC=CC=C2C=C1)=O.OC(C=C1)=CC=C1C[CH](C%10=O)N%11.CC[CH](C)[CH](C(O)=O)N%10                 | 17.8_6 |
| C%11(COC1=CC2=CC=CC=C2C=C1)=O.OC(C=C1)=CC=C1C[CH](C%10=O)N%11.CSCC[CH](C(O)=O)N%10                      | 17.8_7 |
| C%11(COC1=CC2=CC=CC=C2C=C1)=O.OC(C=C1)=CC=C1C[CH](C%10=O)N%11.OC(C=C1)=CC=C1C[CH](C(O)=O)N%10           | 17.8_8 |
| C%11(COC1=CC2=CC=CC=C2C=C1)=O.OC(C=C1)=CC=C1C[CH](C%10=O)N%11.O=C(O)[CH](CC1=C(F)C(F)=C(F)C(F)=C1F)N%10 | 17.8_9 |
| C%10(COC1=CC2=CC=CC=C2C=C1)=O.O=C(O)CN%10                                                               | 17.9_1 |
| C%10(COC1=CC2=CC=CC=C2C=C1)=O.CC(C)[CH](C(O)=O)N%10                                                     | 17.9_2 |
| C%10(COC1=CC2=CC=CC=C2C=C1)=O.CC(C)C[CH](C(O)=O)N%10                                                    | 17.9_3 |
| C%10(COC1=CC2=CC=CC=C2C=C1)=O.C[CH](C(O)=O)N%10                                                         | 17.9_4 |
| C%10(COC1=CC2=CC=CC=C2C=C1)=O.O=C(O)[CH](CC1=CC=CC=C1)N%10                                              | 17.9_5 |
| C%10(COC1=CC2=CC=CC=C2C=C1)=O.CC[CH](C)[CH](C(O)=O)N%10                                                 | 17.9_6 |
| C%10(COC1=CC2=CC=CC=C2C=C1)=O.CSCC[CH](C(O)=O)N%10                                                      | 17.9_7 |
| C%10(COC1=CC2=CC=CC=C2C=C1)=O.OC(C=C1)=CC=C1C[CH](C(O)=O)N%10                                           | 17.9_8 |
| C%10(COC1=CC2=CC=CC=C2C=C1)=O.O=C(O)[CH](CC1=C(F)C(F)=C(F)C(F)=C1F)N%10                                 | 17.9_9 |
| C%11(COC1=CC=CC2=CC=CC=C21)=O.O=C%10CN%11.O=C(O)CN%10                                                   | 18.1_1 |
| C%11(COC1=CC=CC2=CC=CC=C21)=O.O=C%10CN%11.CC(C)[CH](C(O)=O)N%10                                         | 18.1_2 |
| C%11(COC1=CC=CC2=CC=CC=C21)=O.O=C%10CN%11.CC(C)C[CH](C(O)=O)N%10                                        | 18.1_3 |
| C%11(COC1=CC=CC2=CC=CC=C21)=O.O=C%10CN%11.C[CH](C(O)=O)N%10                                             | 18.1_4 |

|                                                                                                |        |
|------------------------------------------------------------------------------------------------|--------|
| C%11(COC1=CC=CC2=CC=CC=C21)=O.O=C%10CN%11.O=C(O)[CH](CC1=CC=CC=C1)N%10                         | 18.1_5 |
| C%11(COC1=CC=CC2=CC=CC=C21)=O.O=C%10CN%11.CC[CH](C)[CH](C(O)=O)N%10                            | 18.1_6 |
| C%11(COC1=CC=CC2=CC=CC=C21)=O.O=C%10CN%11.CSCC[CH](C(O)=O)N%10                                 | 18.1_7 |
| C%11(COC1=CC=CC2=CC=CC=C21)=O.O=C%10CN%11.OC(C=C1)=CC=C1C[CH](C(O)=O)N%10                      | 18.1_8 |
| C%11(COC1=CC=CC2=CC=CC=C21)=O.O=C%10CN%11.O=C(O)[CH](CC1=C(F)C(F)=C(F)C(F)=C1F)N%10            | 18.1_9 |
| C%11(COC1=CC=CC2=CC=CC=C21)=O.CC(C)[CH](C%10=O)N%11.O=C(O)CN%10                                | 18.2_1 |
| C%11(COC1=CC=CC2=CC=CC=C21)=O.CC(C)[CH](C%10=O)N%11.CC(C)[CH](C(O)=O)N%10                      | 18.2_2 |
| C%11(COC1=CC=CC2=CC=CC=C21)=O.CC(C)[CH](C%10=O)N%11.CC(C)C[CH](C(O)=O)N%10                     | 18.2_3 |
| C%11(COC1=CC=CC2=CC=CC=C21)=O.CC(C)[CH](C%10=O)N%11.C[CH](C(O)=O)N%10                          | 18.2_4 |
| C%11(COC1=CC=CC2=CC=CC=C21)=O.CC(C)[CH](C%10=O)N%11.O=C(O)[CH](CC1=CC=CC=C1)N%10               | 18.2_5 |
| C%11(COC1=CC=CC2=CC=CC=C21)=O.CC(C)[CH](C%10=O)N%11.CC[CH](C)[CH](C(O)=O)N%10                  | 18.2_6 |
| C%11(COC1=CC=CC2=CC=CC=C21)=O.CC(C)[CH](C%10=O)N%11.CSCC[CH](C(O)=O)N%10                       | 18.2_7 |
| C%11(COC1=CC=CC2=CC=CC=C21)=O.CC(C)[CH](C%10=O)N%11.OC(C=C1)=CC=C1C[CH](C(O)=O)N%10            | 18.2_8 |
| C%11(COC1=CC=CC2=CC=CC=C21)=O.CC(C)[CH](C%10=O)N%11.O=C(O)[CH](CC1=C(F)C(F)=C(F)C(F)=C1F)N%10  | 18.2_9 |
| C%11(COC1=CC=CC2=CC=CC=C21)=O.CC(C)C[CH](C%10=O)N%11.O=C(O)CN%10                               | 18.3_1 |
| C%11(COC1=CC=CC2=CC=CC=C21)=O.CC(C)C[CH](C%10=O)N%11.CC(C)[CH](C(O)=O)N%10                     | 18.3_2 |
| C%11(COC1=CC=CC2=CC=CC=C21)=O.CC(C)C[CH](C%10=O)N%11.CC(C)C[CH](C(O)=O)N%10                    | 18.3_3 |
| C%11(COC1=CC=CC2=CC=CC=C21)=O.CC(C)C[CH](C%10=O)N%11.C[CH](C(O)=O)N%10                         | 18.3_4 |
| C%11(COC1=CC=CC2=CC=CC=C21)=O.CC(C)C[CH](C%10=O)N%11.O=C(O)[CH](CC1=CC=CC=C1)N%10              | 18.3_5 |
| C%11(COC1=CC=CC2=CC=CC=C21)=O.CC(C)C[CH](C%10=O)N%11.CC[CH](C)[CH](C(O)=O)N%10                 | 18.3_6 |
| C%11(COC1=CC=CC2=CC=CC=C21)=O.CC(C)C[CH](C%10=O)N%11.CSCC[CH](C(O)=O)N%10                      | 18.3_7 |
| C%11(COC1=CC=CC2=CC=CC=C21)=O.CC(C)C[CH](C%10=O)N%11.OC(C=C1)=CC=C1C[CH](C(O)=O)N%10           | 18.3_8 |
| C%11(COC1=CC=CC2=CC=CC=C21)=O.CC(C)C[CH](C%10=O)N%11.O=C(O)[CH](CC1=C(F)C(F)=C(F)C(F)=C1F)N%10 | 18.3_9 |
| C%11(COC1=CC=CC2=CC=CC=C21)=O.C[CH](C%10=O)N%11.O=C(O)CN%10                                    | 18.4_1 |
| C%11(COC1=CC=CC2=CC=CC=C21)=O.C[CH](C%10=O)N%11.CC(C)[CH](C(O)=O)N%10                          | 18.4_2 |
| C%11(COC1=CC=CC2=CC=CC=C21)=O.C[CH](C%10=O)N%11.CC(C)C[CH](C(O)=O)N%10                         | 18.4_3 |
| C%11(COC1=CC=CC2=CC=CC=C21)=O.C[CH](C%10=O)N%11.C[CH](C(O)=O)N%10                              | 18.4_4 |
| C%11(COC1=CC=CC2=CC=CC=C21)=O.C[CH](C%10=O)N%11.O=C(O)[CH](CC1=CC=CC=C1)N%10                   | 18.4_5 |
| C%11(COC1=CC=CC2=CC=CC=C21)=O.C[CH](C%10=O)N%11.CC[CH](C)[CH](C(O)=O)N%10                      | 18.4_6 |
| C%11(COC1=CC=CC2=CC=CC=C21)=O.C[CH](C%10=O)N%11.CSCC[CH](C(O)=O)N%10                           | 18.4_7 |
| C%11(COC1=CC=CC2=CC=CC=C21)=O.C[CH](C%10=O)N%11.OC(C=C1)=CC=C1C[CH](C(O)=O)N%10                | 18.4_8 |

|                                                                                                      |        |
|------------------------------------------------------------------------------------------------------|--------|
| C%11(COC1=CC=CC2=CC=CC=C21)=O.C[CH](C%10=O)N%11.O=C(O)[CH](CC1=C(F)C(F)=C(F)C(F)=C1F)N%10            | 18.4_9 |
| C%11(COC1=CC=CC2=CC=CC=C21)=O.O=C%10[CH](CC1=CC=CC=C1)N%11.O=C(O)CN%10                               | 18.5_1 |
| C%11(COC1=CC=CC2=CC=CC=C21)=O.O=C%10[CH](CC1=CC=CC=C1)N%11.CC(C)[CH](C(O)=O)N%10                     | 18.5_2 |
| C%11(COC1=CC=CC2=CC=CC=C21)=O.O=C%10[CH](CC1=CC=CC=C1)N%11.CC(C)C[CH](C(O)=O)N%10                    | 18.5_3 |
| C%11(COC1=CC=CC2=CC=CC=C21)=O.O=C%10[CH](CC1=CC=CC=C1)N%11.C[CH](C(O)=O)N%10                         | 18.5_4 |
| C%11(COC1=CC=CC2=CC=CC=C21)=O.O=C%10[CH](CC1=CC=CC=C1)N%11.O=C(O)[CH](CC1=CC=CC=C1)N%10              | 18.5_5 |
| C%11(COC1=CC=CC2=CC=CC=C21)=O.O=C%10[CH](CC1=CC=CC=C1)N%11.CC[CH](C)[CH](C(O)=O)N%10                 | 18.5_6 |
| C%11(COC1=CC=CC2=CC=CC=C21)=O.O=C%10[CH](CC1=CC=CC=C1)N%11.CSCC[CH](C(O)=O)N%10                      | 18.5_7 |
| C%11(COC1=CC=CC2=CC=CC=C21)=O.O=C%10[CH](CC1=CC=CC=C1)N%11.OC(C=C1)=CC=C1C[CH](C(O)=O)N%10           | 18.5_8 |
| C%11(COC1=CC=CC2=CC=CC=C21)=O.O=C%10[CH](CC1=CC=CC=C1)N%11.O=C(O)[CH](CC1=C(F)C(F)=C(F)C(F)=C1F)N%10 | 18.5_9 |
| C%11(COC1=CC=CC2=CC=CC=C21)=O.CC[CH](C)[CH](C%10=O)N%11.O=C(O)CN%10                                  | 18.6_1 |
| C%11(COC1=CC=CC2=CC=CC=C21)=O.CC[CH](C)[CH](C%10=O)N%11.CC(C)[CH](C(O)=O)N%10                        | 18.6_2 |
| C%11(COC1=CC=CC2=CC=CC=C21)=O.CC[CH](C)[CH](C%10=O)N%11.CC(C)C[CH](C(O)=O)N%10                       | 18.6_3 |
| C%11(COC1=CC=CC2=CC=CC=C21)=O.CC[CH](C)[CH](C%10=O)N%11.C[CH](C(O)=O)N%10                            | 18.6_4 |
| C%11(COC1=CC=CC2=CC=CC=C21)=O.CC[CH](C)[CH](C%10=O)N%11.O=C(O)[CH](CC1=CC=CC=C1)N%10                 | 18.6_5 |
| C%11(COC1=CC=CC2=CC=CC=C21)=O.CC[CH](C)[CH](C%10=O)N%11.CC[CH](C)[CH](C(O)=O)N%10                    | 18.6_6 |
| C%11(COC1=CC=CC2=CC=CC=C21)=O.CC[CH](C)[CH](C%10=O)N%11.CSCC[CH](C(O)=O)N%10                         | 18.6_7 |
| C%11(COC1=CC=CC2=CC=CC=C21)=O.CC[CH](C)[CH](C%10=O)N%11.OC(C=C1)=CC=C1C[CH](C(O)=O)N%10              | 18.6_8 |
| C%11(COC1=CC=CC2=CC=CC=C21)=O.CC[CH](C)[CH](C%10=O)N%11.O=C(O)[CH](CC1=C(F)C(F)=C(F)C(F)=C1F)N%10    | 18.6_9 |
| C%11(COC1=CC=CC2=CC=CC=C21)=O.CSCC[CH](C%10=O)N%11.O=C(O)CN%10                                       | 18.7_1 |
| C%11(COC1=CC=CC2=CC=CC=C21)=O.CSCC[CH](C%10=O)N%11.CC(C)[CH](C(O)=O)N%10                             | 18.7_2 |
| C%11(COC1=CC=CC2=CC=CC=C21)=O.CSCC[CH](C%10=O)N%11.CC(C)C[CH](C(O)=O)N%10                            | 18.7_3 |
| C%11(COC1=CC=CC2=CC=CC=C21)=O.CSCC[CH](C%10=O)N%11.C[CH](C(O)=O)N%10                                 | 18.7_4 |
| C%11(COC1=CC=CC2=CC=CC=C21)=O.CSCC[CH](C%10=O)N%11.O=C(O)[CH](CC1=CC=CC=C1)N%10                      | 18.7_5 |
| C%11(COC1=CC=CC2=CC=CC=C21)=O.CSCC[CH](C%10=O)N%11.CC[CH](C)[CH](C(O)=O)N%10                         | 18.7_6 |
| C%11(COC1=CC=CC2=CC=CC=C21)=O.CSCC[CH](C%10=O)N%11.CSCC[CH](C(O)=O)N%10                              | 18.7_7 |
| C%11(COC1=CC=CC2=CC=CC=C21)=O.CSCC[CH](C%10=O)N%11.OC(C=C1)=CC=C1C[CH](C(O)=O)N%10                   | 18.7_8 |
| C%11(COC1=CC=CC2=CC=CC=C21)=O.CSCC[CH](C%10=O)N%11.O=C(O)[CH](CC1=C(F)C(F)=C(F)C(F)=C1F)N%10         | 18.7_9 |



|                                                                                                          |        |
|----------------------------------------------------------------------------------------------------------|--------|
| =C(F)C(F)=C1F)N%10                                                                                       |        |
| C%11(COC1=CC=CC2=CC=CC=C21)=O.O.C(C=C1)=CC=C1C[CH](C%10=O)N%11.O=C(O)CN%10                               | 18.8_1 |
| C%11(COC1=CC=CC2=CC=CC=C21)=O.O.C(C=C1)=CC=C1C[CH](C%10=O)N%11.CC(C)[CH](C(O)=O)N%10                     | 18.8_2 |
| C%11(COC1=CC=CC2=CC=CC=C21)=O.O.C(C=C1)=CC=C1C[CH](C%10=O)N%11.CC(C)C[CH](C(O)=O)N%10                    | 18.8_3 |
| C%11(COC1=CC=CC2=CC=CC=C21)=O.O.C(C=C1)=CC=C1C[CH](C%10=O)N%11.C[CH](C(O)=O)N%10                         | 18.8_4 |
| C%11(COC1=CC=CC2=CC=CC=C21)=O.O.C(C=C1)=CC=C1C[CH](C%10=O)N%11.O=C(O)[CH](CC1=CC=CC=C1)N%10              | 18.8_5 |
| C%11(COC1=CC=CC2=CC=CC=C21)=O.O.C(C=C1)=CC=C1C[CH](C%10=O)N%11.CC[CH](C)[CH](C(O)=O)N%10                 | 18.8_6 |
| C%11(COC1=CC=CC2=CC=CC=C21)=O.O.C(C=C1)=CC=C1C[CH](C%10=O)N%11.CSCC[CH](C(O)=O)N%10                      | 18.8_7 |
| C%11(COC1=CC=CC2=CC=CC=C21)=O.O.C(C=C1)=CC=C1C[CH](C%10=O)N%11.O.C(C=C1)=CC=C1C[CH](C(O)=O)N%10          | 18.8_8 |
| C%11(COC1=CC=CC2=CC=CC=C21)=O.O.C(C=C1)=CC=C1C[CH](C%10=O)N%11.O=C(O)[CH](CC1=C(F)C(F)=C(F)C(F)=C1F)N%10 | 18.8_9 |
| C%10(COC1=CC=CC2=CC=CC=C21)=O.O=C(O)CN%10                                                                | 18.9_1 |
| C%10(COC1=CC=CC2=CC=CC=C21)=O.CC(C)[CH](C(O)=O)N%10                                                      | 18.9_2 |
| C%10(COC1=CC=CC2=CC=CC=C21)=O.CC(C)C[CH](C(O)=O)N%10                                                     | 18.9_3 |
| C%10(COC1=CC=CC2=CC=CC=C21)=O.C[CH](C(O)=O)N%10                                                          | 18.9_4 |
| C%10(COC1=CC=CC2=CC=CC=C21)=O.O=C(O)[CH](CC1=CC=CC=C1)N%10                                               | 18.9_5 |
| C%10(COC1=CC=CC2=CC=CC=C21)=O.CC[CH](C)[CH](C(O)=O)N%10                                                  | 18.9_6 |
| C%10(COC1=CC=CC2=CC=CC=C21)=O.CSCC[CH](C(O)=O)N%10                                                       | 18.9_7 |
| C%10(COC1=CC=CC2=CC=CC=C21)=O.O.C(C=C1)=CC=C1C[CH](C(O)=O)N%10                                           | 18.9_8 |
| C%10(COC1=CC=CC2=CC=CC=C21)=O.O=C(O)[CH](CC1=C(F)C(F)=C(F)C(F)=C1F)N%10                                  | 18.9_9 |
| C%11(CCCCCCCCCCCCCC)=O.O=C%10CN%11.O=C(O)CN%10                                                           | 19.1_1 |
| C%11(CCCCCCCCCCCCCC)=O.O=C%10CN%11.CC(C)[CH](C(O)=O)N%10                                                 | 19.1_2 |
| C%11(CCCCCCCCCCCCCC)=O.O=C%10CN%11.CC(C)C[CH](C(O)=O)N%10                                                | 19.1_3 |
| C%11(CCCCCCCCCCCCCC)=O.O=C%10CN%11.C[CH](C(O)=O)N%10                                                     | 19.1_4 |
| C%11(CCCCCCCCCCCCCC)=O.O=C%10CN%11.O=C(O)[CH](CC1=CC=CC=C1)N%10                                          | 19.1_5 |
| C%11(CCCCCCCCCCCCCC)=O.O=C%10CN%11.CC[CH](C)[CH](C(O)=O)N%10                                             | 19.1_6 |
| C%11(CCCCCCCCCCCCCC)=O.O=C%10CN%11.CSCC[CH](C(O)=O)N%10                                                  | 19.1_7 |
| C%11(CCCCCCCCCCCCCC)=O.O=C%10CN%11.O.C(C=C1)=CC=C1C[CH](C(O)=O)N%10                                      | 19.1_8 |
| C%11(CCCCCCCCCCCCCC)=O.O=C%10CN%11.O=C(O)[CH](CC1=C(F)C(F)=C(F)C(F)=C1F)N%10                             | 19.1_9 |
| C%11(CCCCCCCCCCCCCC)=O.CC(C)[CH](C%10=O)N%11.O=C(O)CN%10                                                 | 19.2_1 |
| C%11(CCCCCCCCCCCCCC)=O.CC(C)[CH](C%10=O)N%11.CC(C)[CH](C(O)=O)N%10                                       | 19.2_2 |
| C%11(CCCCCCCCCCCCCC)=O.CC(C)[CH](C%10=O)N%11.CC(C)C[CH](C(O)=O)N%10                                      | 19.2_3 |
| C%11(CCCCCCCCCCCCCC)=O.CC(C)[CH](C%10=O)N%11.C[CH](C(O)=O)N%10                                           | 19.2_4 |
| C%11(CCCCCCCCCCCCCC)=O.CC(C)[CH](C%10=O)N%11.O=C(O)[CH](CC1=CC=CC=C1)N%10                                | 19.2_5 |
| C%11(CCCCCCCCCCCCCC)=O.CC(C)[CH](C%10=O)N%11.CC[CH](C)[CH](C(O)=O)N%10                                   | 19.2_6 |
| C%11(CCCCCCCCCCCCCC)=O.CC(C)[CH](C%10=O)N%11.CSCC[CH](C(O)=O)N%10                                        | 19.2_7 |

|                                                                                               |        |
|-----------------------------------------------------------------------------------------------|--------|
| C%11(CCCCCCCCCCCCCC)=O.CC(C)[CH](C%10=O)N%11.OC(C=C1)=CC=C1C[CH](C(O)=O)N%10                  | 19.2_8 |
| C%11(CCCCCCCCCCCCCC)=O.CC(C)[CH](C%10=O)N%11.O=C(O)[CH](CC1=C(F)C(F)=C(F)C(F)=C1F)N%10        | 19.2_9 |
| C%11(CCCCCCCCCCCCCC)=O.CC(C)C[CH](C%10=O)N%11.O=C(O)CN%10                                     | 19.3_1 |
| C%11(CCCCCCCCCCCCCC)=O.CC(C)C[CH](C%10=O)N%11.CC(C)[CH](C(O)=O)N%10                           | 19.3_2 |
| C%11(CCCCCCCCCCCCCC)=O.CC(C)C[CH](C%10=O)N%11.CC(C)C[CH](C(O)=O)N%10                          | 19.3_3 |
| C%11(CCCCCCCCCCCCCC)=O.CC(C)C[CH](C%10=O)N%11.C[CH](C(O)=O)N%10                               | 19.3_4 |
| C%11(CCCCCCCCCCCCCC)=O.CC(C)C[CH](C%10=O)N%11.O=C(O)[CH](CC1=CC=CC=C1)N%10                    | 19.3_5 |
| C%11(CCCCCCCCCCCCCC)=O.CC(C)C[CH](C%10=O)N%11.CC[CH](C)[CH](C(O)=O)N%10                       | 19.3_6 |
| C%11(CCCCCCCCCCCCCC)=O.CC(C)C[CH](C%10=O)N%11.CSCC[CH](C(O)=O)N%10                            | 19.3_7 |
| C%11(CCCCCCCCCCCCCC)=O.CC(C)C[CH](C%10=O)N%11.OC(C=C1)=CC=C1C[CH](C(O)=O)N%10                 | 19.3_8 |
| C%11(CCCCCCCCCCCCCC)=O.CC(C)C[CH](C%10=O)N%11.O=C(O)[CH](CC1=C(F)C(F)=C(F)C(F)=C1F)N%10       | 19.3_9 |
| C%11(CCCCCCCCCCCCCC)=O.C[CH](C%10=O)N%11.O=C(O)CN%10                                          | 19.4_1 |
| C%11(CCCCCCCCCCCCCC)=O.C[CH](C%10=O)N%11.CC(C)[CH](C(O)=O)N%10                                | 19.4_2 |
| C%11(CCCCCCCCCCCCCC)=O.C[CH](C%10=O)N%11.CC(C)C[CH](C(O)=O)N%10                               | 19.4_3 |
| C%11(CCCCCCCCCCCCCC)=O.C[CH](C%10=O)N%11.C[CH](C(O)=O)N%10                                    | 19.4_4 |
| C%11(CCCCCCCCCCCCCC)=O.C[CH](C%10=O)N%11.O=C(O)[CH](CC1=CC=CC=C1)N%10                         | 19.4_5 |
| C%11(CCCCCCCCCCCCCC)=O.C[CH](C%10=O)N%11.CC[CH](C)[CH](C(O)=O)N%10                            | 19.4_6 |
| C%11(CCCCCCCCCCCCCC)=O.C[CH](C%10=O)N%11.CSCC[CH](C(O)=O)N%10                                 | 19.4_7 |
| C%11(CCCCCCCCCCCCCC)=O.C[CH](C%10=O)N%11.OC(C=C1)=CC=C1C[CH](C(O)=O)N%10                      | 19.4_8 |
| C%11(CCCCCCCCCCCCCC)=O.C[CH](C%10=O)N%11.O=C(O)[CH](CC1=C(F)C(F)=C(F)C(F)=C1F)N%10            | 19.4_9 |
| C%11(CCCCCCCCCCCCCC)=O.O=C%10[CH](CC1=CC=CC=C1)N%11.O=C(O)CN%10                               | 19.5_1 |
| C%11(CCCCCCCCCCCCCC)=O.O=C%10[CH](CC1=CC=CC=C1)N%11.CC(C)[CH](C(O)=O)N%10                     | 19.5_2 |
| C%11(CCCCCCCCCCCCCC)=O.O=C%10[CH](CC1=CC=CC=C1)N%11.CC(C)C[CH](C(O)=O)N%10                    | 19.5_3 |
| C%11(CCCCCCCCCCCCCC)=O.O=C%10[CH](CC1=CC=CC=C1)N%11.C[CH](C(O)=O)N%10                         | 19.5_4 |
| C%11(CCCCCCCCCCCCCC)=O.O=C%10[CH](CC1=CC=CC=C1)N%11.O=C(O)[CH](CC1=CC=CC=C1)N%10              | 19.5_5 |
| C%11(CCCCCCCCCCCCCC)=O.O=C%10[CH](CC1=CC=CC=C1)N%11.CC[CH](C)[CH](C(O)=O)N%10                 | 19.5_6 |
| C%11(CCCCCCCCCCCCCC)=O.O=C%10[CH](CC1=CC=CC=C1)N%11.CSCC[CH](C(O)=O)N%10                      | 19.5_7 |
| C%11(CCCCCCCCCCCCCC)=O.O=C%10[CH](CC1=CC=CC=C1)N%11.OC(C=C1)=CC=C1C[CH](C(O)=O)N%10           | 19.5_8 |
| C%11(CCCCCCCCCCCCCC)=O.O=C%10[CH](CC1=CC=CC=C1)N%11.O=C(O)[CH](CC1=C(F)C(F)=C(F)C(F)=C1F)N%10 | 19.5_9 |
| C%11(CCCCCCCCCCCCCC)=O.CC[CH](C)[CH](C%10=O)N%11.O=C(O)CN%10                                  | 19.6_1 |
| C%11(CCCCCCCCCCCCCC)=O.CC[CH](C)[CH](C%10=O)N%11.CC(C)[CH](C(O)=O)N%10                        | 19.6_2 |
| C%11(CCCCCCCCCCCCCC)=O.CC[CH](C)[CH](C%10=O)N%11.CC(C)C[CH](C(O)=O)N%10                       | 19.6_3 |
| C%11(CCCCCCCCCCCCCC)=O.CC[CH](C)[CH](C%10=O)N%11.C[CH](C(O)=O)N%10                            | 19.6_4 |

|                                                                                                  |        |
|--------------------------------------------------------------------------------------------------|--------|
| C%11(CCCCCCCCCCCCCC)=O.CC[CH](C)[CH](C%10=O)N%11.O=C(O)[CH](CC1=CC=CC=C1)N%10                    | 19.6_5 |
| C%11(CCCCCCCCCCCCCC)=O.CC[CH](C)[CH](C%10=O)N%11.CC[CH](C)[CH](C(O)=O)N%10                       | 19.6_6 |
| C%11(CCCCCCCCCCCCCC)=O.CC[CH](C)[CH](C%10=O)N%11.CSCC[CH](C(O)=O)N%10                            | 19.6_7 |
| C%11(CCCCCCCCCCCCCC)=O.CC[CH](C)[CH](C%10=O)N%11.OC(C=C1)=CC=C1C[CH](C(O)=O)N%10                 | 19.6_8 |
| C%11(CCCCCCCCCCCCCC)=O.CC[CH](C)[CH](C%10=O)N%11.O=C(O)[CH](CC1=C(F)C(F)=C(F)C(F)=C1F)N%10       | 19.6_9 |
| C%11(CCCCCCCCCCCCCC)=O.CSCC[CH](C%10=O)N%11.O=C(O)CN%10                                          | 19.7_1 |
| C%11(CCCCCCCCCCCCCC)=O.CSCC[CH](C%10=O)N%11.CC(C)[CH](C(O)=O)N%10                                | 19.7_2 |
| C%11(CCCCCCCCCCCCCC)=O.CSCC[CH](C%10=O)N%11.CC(C)C[CH](C(O)=O)N%10                               | 19.7_3 |
| C%11(CCCCCCCCCCCCCC)=O.CSCC[CH](C%10=O)N%11.C[CH](C(O)=O)N%10                                    | 19.7_4 |
| C%11(CCCCCCCCCCCCCC)=O.CSCC[CH](C%10=O)N%11.O=C(O)[CH](CC1=CC=CC=C1)N%10                         | 19.7_5 |
| C%11(CCCCCCCCCCCCCC)=O.CSCC[CH](C%10=O)N%11.CC[CH](C)[CH](C(O)=O)N%10                            | 19.7_6 |
| C%11(CCCCCCCCCCCCCC)=O.CSCC[CH](C%10=O)N%11.CSCC[CH](C(O)=O)N%10                                 | 19.7_7 |
| C%11(CCCCCCCCCCCCCC)=O.CSCC[CH](C%10=O)N%11.OC(C=C1)=CC=C1C[CH](C(O)=O)N%10                      | 19.7_8 |
| C%11(CCCCCCCCCCCCCC)=O.CSCC[CH](C%10=O)N%11.O=C(O)[CH](CC1=C(F)C(F)=C(F)C(F)=C1F)N%10            | 19.7_9 |
| C%11(CCCCCCCCCCCCCC)=O.OC(C=C1)=CC=C1C[CH](C%10=O)N%11.O=C(O)CN%10                               | 19.8_1 |
| C%11(CCCCCCCCCCCCCC)=O.OC(C=C1)=CC=C1C[CH](C%10=O)N%11.CC(C)[CH](C(O)=O)N%10                     | 19.8_2 |
| C%11(CCCCCCCCCCCCCC)=O.OC(C=C1)=CC=C1C[CH](C%10=O)N%11.CC(C)C[CH](C(O)=O)N%10                    | 19.8_3 |
| C%11(CCCCCCCCCCCCCC)=O.OC(C=C1)=CC=C1C[CH](C%10=O)N%11.C[CH](C(O)=O)N%10                         | 19.8_4 |
| C%11(CCCCCCCCCCCCCC)=O.OC(C=C1)=CC=C1C[CH](C%10=O)N%11.O=C(O)[CH](CC1=CC=CC=C1)N%10              | 19.8_5 |
| C%11(CCCCCCCCCCCCCC)=O.OC(C=C1)=CC=C1C[CH](C%10=O)N%11.CC[CH](C)[CH](C(O)=O)N%10                 | 19.8_6 |
| C%11(CCCCCCCCCCCCCC)=O.OC(C=C1)=CC=C1C[CH](C%10=O)N%11.CSCC[CH](C(O)=O)N%10                      | 19.8_7 |
| C%11(CCCCCCCCCCCCCC)=O.OC(C=C1)=CC=C1C[CH](C%10=O)N%11.OC(C=C1)=CC=C1C[CH](C(O)=O)N%10           | 19.8_8 |
| C%11(CCCCCCCCCCCCCC)=O.OC(C=C1)=CC=C1C[CH](C%10=O)N%11.O=C(O)[CH](CC1=C(F)C(F)=C(F)C(F)=C1F)N%10 | 19.8_9 |
| C%10(CCCCCCCCCCCCCC)=O.O=C(O)CN%10                                                               | 19.9_1 |
| C%10(CCCCCCCCCCCCCC)=O.CC(C)[CH](C(O)=O)N%10                                                     | 19.9_2 |
| C%10(CCCCCCCCCCCCCC)=O.CC(C)C[CH](C(O)=O)N%10                                                    | 19.9_3 |
| C%10(CCCCCCCCCCCCCC)=O.C[CH](C(O)=O)N%10                                                         | 19.9_4 |
| C%10(CCCCCCCCCCCCCC)=O.O=C(O)[CH](CC1=CC=CC=C1)N%10                                              | 19.9_5 |
| C%10(CCCCCCCCCCCCCC)=O.CC[CH](C)[CH](C(O)=O)N%10                                                 | 19.9_6 |
| C%10(CCCCCCCCCCCCCC)=O.CSCC[CH](C(O)=O)N%10                                                      | 19.9_7 |
| C%10(CCCCCCCCCCCCCC)=O.OC(C=C1)=CC=C1C[CH](C(O)=O)N%10                                           | 19.9_8 |
| C%10(CCCCCCCCCCCCCC)=O.O=C(O)[CH](CC1=C(F)C(F)=C(F)C(F)=C1F)N%10                                 | 19.9_9 |

|                                                                                       |        |
|---------------------------------------------------------------------------------------|--------|
| CCCCCCCCCCCCCCC%11=O.O=C%10CN%11.O=C(O)CN%10                                          | 20.1_1 |
| CCCCCCCCCCCCCCC%11=O.O=C%10CN%11.CC(C)[CH](C(O)=O)N%10                                | 20.1_2 |
| CCCCCCCCCCCCCCC%11=O.O=C%10CN%11.CC(C)C[CH](C(O)=O)N%10                               | 20.1_3 |
| CCCCCCCCCCCCCCC%11=O.O=C%10CN%11.C[CH](C(O)=O)N%10                                    | 20.1_4 |
| CCCCCCCCCCCCCCC%11=O.O=C%10CN%11.O=C(O)[CH](CC1=CC=CC=C1)N%10                         | 20.1_5 |
| CCCCCCCCCCCCCCC%11=O.O=C%10CN%11.CC[CH](C)[CH](C(O)=O)N%10                            | 20.1_6 |
| CCCCCCCCCCCCCCC%11=O.O=C%10CN%11.CSCC[CH](C(O)=O)N%10                                 | 20.1_7 |
| CCCCCCCCCCCCCCC%11=O.O=C%10CN%11.OC(C=C1)=CC=C1C[CH](C(O)=O)N%10                      | 20.1_8 |
| CCCCCCCCCCCCCCC%11=O.O=C%10CN%11.O=C(O)[CH](CC1=C(F)C(F)=C(F)C(F)=C1F)N%10            | 20.1_9 |
| CCCCCCCCCCCCCCC%11=O.CC(C)[CH](C%10=O)N%11.O=C(O)CN%10                                | 20.2_1 |
| CCCCCCCCCCCCCCC%11=O.CC(C)[CH](C%10=O)N%11.CC(C)[CH](C(O)=O)N%10                      | 20.2_2 |
| CCCCCCCCCCCCCCC%11=O.CC(C)[CH](C%10=O)N%11.CC(C)C[CH](C(O)=O)N%10                     | 20.2_3 |
| CCCCCCCCCCCCCCC%11=O.CC(C)[CH](C%10=O)N%11.C[CH](C(O)=O)N%10                          | 20.2_4 |
| CCCCCCCCCCCCCCC%11=O.CC(C)[CH](C%10=O)N%11.O=C(O)[CH](CC1=CC=CC=C1)N%10               | 20.2_5 |
| CCCCCCCCCCCCCCC%11=O.CC(C)[CH](C%10=O)N%11.CC[CH](C)[CH](C(O)=O)N%10                  | 20.2_6 |
| CCCCCCCCCCCCCCC%11=O.CC(C)[CH](C%10=O)N%11.CSCC[CH](C(O)=O)N%10                       | 20.2_7 |
| CCCCCCCCCCCCCCC%11=O.CC(C)[CH](C%10=O)N%11.OC(C=C1)=CC=C1C[CH](C(O)=O)N%10            | 20.2_8 |
| CCCCCCCCCCCCCCC%11=O.CC(C)[CH](C%10=O)N%11.O=C(O)[CH](CC1=C(F)C(F)=C(F)C(F)=C1F)N%10  | 20.2_9 |
| CCCCCCCCCCCCCCC%11=O.CC(C)C[CH](C%10=O)N%11.O=C(O)CN%10                               | 20.3_1 |
| CCCCCCCCCCCCCCC%11=O.CC(C)C[CH](C%10=O)N%11.CC(C)[CH](C(O)=O)N%10                     | 20.3_2 |
| CCCCCCCCCCCCCCC%11=O.CC(C)C[CH](C%10=O)N%11.CC(C)C[CH](C(O)=O)N%10                    | 20.3_3 |
| CCCCCCCCCCCCCCC%11=O.CC(C)C[CH](C%10=O)N%11.C[CH](C(O)=O)N%10                         | 20.3_4 |
| CCCCCCCCCCCCCCC%11=O.CC(C)C[CH](C%10=O)N%11.O=C(O)[CH](CC1=CC=CC=C1)N%10              | 20.3_5 |
| CCCCCCCCCCCCCCC%11=O.CC(C)C[CH](C%10=O)N%11.CC[CH](C)[CH](C(O)=O)N%10                 | 20.3_6 |
| CCCCCCCCCCCCCCC%11=O.CC(C)C[CH](C%10=O)N%11.CSCC[CH](C(O)=O)N%10                      | 20.3_7 |
| CCCCCCCCCCCCCCC%11=O.CC(C)C[CH](C%10=O)N%11.OC(C=C1)=CC=C1C[CH](C(O)=O)N%10           | 20.3_8 |
| CCCCCCCCCCCCCCC%11=O.CC(C)C[CH](C%10=O)N%11.O=C(O)[CH](CC1=C(F)C(F)=C(F)C(F)=C1F)N%10 | 20.3_9 |
| CCCCCCCCCCCCCCC%11=O.C[CH](C%10=O)N%11.O=C(O)CN%10                                    | 20.4_1 |
| CCCCCCCCCCCCCCC%11=O.C[CH](C%10=O)N%11.CC(C)[CH](C(O)=O)N%10                          | 20.4_2 |
| CCCCCCCCCCCCCCC%11=O.C[CH](C%10=O)N%11.CC(C)C[CH](C(O)=O)N%10                         | 20.4_3 |
| CCCCCCCCCCCCCCC%11=O.C[CH](C%10=O)N%11.C[CH](C(O)=O)N%10                              | 20.4_4 |
| CCCCCCCCCCCCCCC%11=O.C[CH](C%10=O)N%11.O=C(O)[CH](CC1=CC=CC=C1)N%10                   | 20.4_5 |
| CCCCCCCCCCCCCCC%11=O.C[CH](C%10=O)N%11.CC[CH](C)[CH](C(O)=O)N%10                      | 20.4_6 |
| CCCCCCCCCCCCCCC%11=O.C[CH](C%10=O)N%11.CSCC[CH](C(O)=O)N%10                           | 20.4_7 |
| CCCCCCCCCCCCCCC%11=O.C[CH](C%10=O)N%11.OC(C=C1)=CC=C1C[CH](C(O)=O)N%10                | 20.4_8 |
| CCCCCCCCCCCCCCC%11=O.C[CH](C%10=O)N%11.O=C(O)[CH](CC1=C(F)C(F)=C(F)C(F)=C1F)N%10      | 20.4_9 |
| CCCCCCCCCCCCCCC%11=O.O=C%10[CH](CC1=CC=CC=C1)N%11.O=C(O)CN%10                         | 20.5_1 |
| CCCCCCCCCCCCCCC%11=O.O=C%10[CH](CC1=CC=CC=C1)N%11.CC(C)[CH](C(O)=O)N%10               | 20.5_2 |
| CCCCCCCCCCCCCCC%11=O.O=C%10[CH](CC1=CC=CC=C1)N%11.CC(C)C[CH](C(O)=O)N%10              | 20.5_3 |
| CCCCCCCCCCCCCCC%11=O.O=C%10[CH](CC1=CC=CC=C1)N%11.C[CH](C(O)=O)N%10                   | 20.5_4 |

|                                                                                                |        |
|------------------------------------------------------------------------------------------------|--------|
| CCCCCCCCCCCCCCC%11=O.O=C%10[CH](CC1=CC=CC=C1)N%11.O=C(O)[CH](CC1=CC=CC=C1)N%10                 | 20.5_5 |
| CCCCCCCCCCCCCCC%11=O.O=C%10[CH](CC1=CC=CC=C1)N%11.CC[CH](C)[CH](C(O)=O)N%10                    | 20.5_6 |
| CCCCCCCCCCCCCCC%11=O.O=C%10[CH](CC1=CC=CC=C1)N%11.CSCC[CH](C(O)=O)N%10                         | 20.5_7 |
| CCCCCCCCCCCCCCC%11=O.O=C%10[CH](CC1=CC=CC=C1)N%11.OC(C=C1)=CC=C1C[CH](C(O)=O)N%10              | 20.5_8 |
| CCCCCCCCCCCCCCC%11=O.O=C%10[CH](CC1=CC=CC=C1)N%11.O=C(O)[CH](CC1=C(F)C(F)=C(F)C(F)=C1F)N%10    | 20.5_9 |
| CCCCCCCCCCCCCCC%11=O.CC[CH](C)[CH](C%10=O)N%11.O=C(O)CN%10                                     | 20.6_1 |
| CCCCCCCCCCCCCCC%11=O.CC[CH](C)[CH](C%10=O)N%11.CC(C)[CH](C(O)=O)N%10                           | 20.6_2 |
| CCCCCCCCCCCCCCC%11=O.CC[CH](C)[CH](C%10=O)N%11.CC(C)C[CH](C(O)=O)N%10                          | 20.6_3 |
| CCCCCCCCCCCCCCC%11=O.CC[CH](C)[CH](C%10=O)N%11.C[CH](C(O)=O)N%10                               | 20.6_4 |
| CCCCCCCCCCCCCCC%11=O.CC[CH](C)[CH](C%10=O)N%11.O=C(O)[CH](CC1=CC=CC=C1)N%10                    | 20.6_5 |
| CCCCCCCCCCCCCCC%11=O.CC[CH](C)[CH](C%10=O)N%11.CC[CH](C)[CH](C(O)=O)N%10                       | 20.6_6 |
| CCCCCCCCCCCCCCC%11=O.CC[CH](C)[CH](C%10=O)N%11.CSCC[CH](C(O)=O)N%10                            | 20.6_7 |
| CCCCCCCCCCCCCCC%11=O.CC[CH](C)[CH](C%10=O)N%11.OC(C=C1)=CC=C1C[CH](C(O)=O)N%10                 | 20.6_8 |
| CCCCCCCCCCCCCCC%11=O.CC[CH](C)[CH](C%10=O)N%11.O=C(O)[CH](CC1=C(F)C(F)=C(F)C(F)=C1F)N%10       | 20.6_9 |
| CCCCCCCCCCCCCCC%11=O.CSCC[CH](C%10=O)N%11.O=C(O)CN%10                                          | 20.7_1 |
| CCCCCCCCCCCCCCC%11=O.CSCC[CH](C%10=O)N%11.CC(C)[CH](C(O)=O)N%10                                | 20.7_2 |
| CCCCCCCCCCCCCCC%11=O.CSCC[CH](C%10=O)N%11.CC(C)C[CH](C(O)=O)N%10                               | 20.7_3 |
| CCCCCCCCCCCCCCC%11=O.CSCC[CH](C%10=O)N%11.C[CH](C(O)=O)N%10                                    | 20.7_4 |
| CCCCCCCCCCCCCCC%11=O.CSCC[CH](C%10=O)N%11.O=C(O)[CH](CC1=CC=CC=C1)N%10                         | 20.7_5 |
| CCCCCCCCCCCCCCC%11=O.CSCC[CH](C%10=O)N%11.CC[CH](C)[CH](C(O)=O)N%10                            | 20.7_6 |
| CCCCCCCCCCCCCCC%11=O.CSCC[CH](C%10=O)N%11.CSCC[CH](C(O)=O)N%10                                 | 20.7_7 |
| CCCCCCCCCCCCCCC%11=O.CSCC[CH](C%10=O)N%11.OC(C=C1)=CC=C1C[CH](C(O)=O)N%10                      | 20.7_8 |
| CCCCCCCCCCCCCCC%11=O.CSCC[CH](C%10=O)N%11.O=C(O)[CH](CC1=C(F)C(F)=C(F)C(F)=C1F)N%10            | 20.7_9 |
| CCCCCCCCCCCCCCC%11=O.OC(C=C1)=CC=C1C[CH](C%10=O)N%11.O=C(O)CN%10                               | 20.8_1 |
| CCCCCCCCCCCCCCC%11=O.OC(C=C1)=CC=C1C[CH](C%10=O)N%11.CC(C)[CH](C(O)=O)N%10                     | 20.8_2 |
| CCCCCCCCCCCCCCC%11=O.OC(C=C1)=CC=C1C[CH](C%10=O)N%11.CC(C)C[CH](C(O)=O)N%10                    | 20.8_3 |
| CCCCCCCCCCCCCCC%11=O.OC(C=C1)=CC=C1C[CH](C%10=O)N%11.C[CH](C(O)=O)N%10                         | 20.8_4 |
| CCCCCCCCCCCCCCC%11=O.OC(C=C1)=CC=C1C[CH](C%10=O)N%11.O=C(O)[CH](CC1=CC=CC=C1)N%10              | 20.8_5 |
| CCCCCCCCCCCCCCC%11=O.OC(C=C1)=CC=C1C[CH](C%10=O)N%11.CC[CH](C)[CH](C(O)=O)N%10                 | 20.8_6 |
| CCCCCCCCCCCCCCC%11=O.OC(C=C1)=CC=C1C[CH](C%10=O)N%11.CSCC[CH](C(O)=O)N%10                      | 20.8_7 |
| CCCCCCCCCCCCCCC%11=O.OC(C=C1)=CC=C1C[CH](C%10=O)N%11.OC(C=C1)=CC=C1C[CH](C(O)=O)N%10           | 20.8_8 |
| CCCCCCCCCCCCCCC%11=O.OC(C=C1)=CC=C1C[CH](C%10=O)N%11.O=C(O)[CH](CC1=C(F)C(F)=C(F)C(F)=C1F)N%10 | 20.8_9 |

|                                                                                        |        |
|----------------------------------------------------------------------------------------|--------|
| F)=C(F)C(F)=C1F)N%10                                                                   |        |
| CCCCCCCCCCCC%10=O.O=C(O)CN%10                                                          | 20.9_1 |
| CCCCCCCCCCCC%10=O.CC(C)[CH](C(O)=O)N%10                                                | 20.9_2 |
| CCCCCCCCCCCC%10=O.CC(C)C[CH](C(O)=O)N%10                                               | 20.9_3 |
| CCCCCCCCCCCC%10=O.C[CH](C(O)=O)N%10                                                    | 20.9_4 |
| CCCCCCCCCCCC%10=O.O=C(O)[CH](CC1=CC=CC=C1)N%10                                         | 20.9_5 |
| CCCCCCCCCCCC%10=O.CC[CH](C)[CH](C(O)=O)N%10                                            | 20.9_6 |
| CCCCCCCCCCCC%10=O.CSCC[CH](C(O)=O)N%10                                                 | 20.9_7 |
| CCCCCCCCCCCC%10=O.OC(C=C1)=CC=C1C[CH](C(O)=O)N%10                                      | 20.9_8 |
| CCCCCCCCCCCC%10=O.O=C(O)[CH](CC1=C(F)C(F)=C(F)C(F)=C1F)N%10                            | 20.9_9 |
| C%11(COC1=CC=CC=C1)=O.O=C%10CN%11.O=C(O)CN%10                                          | 21.1_1 |
| C%11(COC1=CC=CC=C1)=O.O=C%10CN%11.CC(C)[CH](C(O)=O)N%10                                | 21.1_2 |
| C%11(COC1=CC=CC=C1)=O.O=C%10CN%11.CC(C)C[CH](C(O)=O)N%10                               | 21.1_3 |
| C%11(COC1=CC=CC=C1)=O.O=C%10CN%11.C[CH](C(O)=O)N%10                                    | 21.1_4 |
| C%11(COC1=CC=CC=C1)=O.O=C%10CN%11.O=C(O)[CH](CC1=CC=CC=C1)N%10                         | 21.1_5 |
| C%11(COC1=CC=CC=C1)=O.O=C%10CN%11.CC[CH](C)[CH](C(O)=O)N%10                            | 21.1_6 |
| C%11(COC1=CC=CC=C1)=O.O=C%10CN%11.CSCC[CH](C(O)=O)N%10                                 | 21.1_7 |
| C%11(COC1=CC=CC=C1)=O.O=C%10CN%11.OC(C=C1)=CC=C1C[CH](C(O)=O)N%10                      | 21.1_8 |
| C%11(COC1=CC=CC=C1)=O.O=C%10CN%11.O=C(O)[CH](CC1=C(F)C(F)=C(F)C(F)=C1F)N%10            | 21.1_9 |
| C%11(COC1=CC=CC=C1)=O.CC(C)[CH](C%10=O)N%11.O=C(O)CN%10                                | 21.2_1 |
| C%11(COC1=CC=CC=C1)=O.CC(C)[CH](C%10=O)N%11.CC(C)[CH](C(O)=O)N%10                      | 21.2_2 |
| C%11(COC1=CC=CC=C1)=O.CC(C)[CH](C%10=O)N%11.CC(C)C[CH](C(O)=O)N%10                     | 21.2_3 |
| C%11(COC1=CC=CC=C1)=O.CC(C)[CH](C%10=O)N%11.C[CH](C(O)=O)N%10                          | 21.2_4 |
| C%11(COC1=CC=CC=C1)=O.CC(C)[CH](C%10=O)N%11.O=C(O)[CH](CC1=CC=CC=C1)N%10               | 21.2_5 |
| C%11(COC1=CC=CC=C1)=O.CC(C)[CH](C%10=O)N%11.CC[CH](C)[CH](C(O)=O)N%10                  | 21.2_6 |
| C%11(COC1=CC=CC=C1)=O.CC(C)[CH](C%10=O)N%11.CSCC[CH](C(O)=O)N%10                       | 21.2_7 |
| C%11(COC1=CC=CC=C1)=O.CC(C)[CH](C%10=O)N%11.OC(C=C1)=CC=C1C[CH](C(O)=O)N%10            | 21.2_8 |
| C%11(COC1=CC=CC=C1)=O.CC(C)[CH](C%10=O)N%11.O=C(O)[CH](CC1=C(F)C(F)=C(F)C(F)=C1F)N%10  | 21.2_9 |
| C%11(COC1=CC=CC=C1)=O.CC(C)C[CH](C%10=O)N%11.O=C(O)CN%10                               | 21.3_1 |
| C%11(COC1=CC=CC=C1)=O.CC(C)C[CH](C%10=O)N%11.CC(C)[CH](C(O)=O)N%10                     | 21.3_2 |
| C%11(COC1=CC=CC=C1)=O.CC(C)C[CH](C%10=O)N%11.CC(C)C[CH](C(O)=O)N%10                    | 21.3_3 |
| C%11(COC1=CC=CC=C1)=O.CC(C)C[CH](C%10=O)N%11.C[CH](C(O)=O)N%10                         | 21.3_4 |
| C%11(COC1=CC=CC=C1)=O.CC(C)C[CH](C%10=O)N%11.O=C(O)[CH](CC1=CC=CC=C1)N%10              | 21.3_5 |
| C%11(COC1=CC=CC=C1)=O.CC(C)C[CH](C%10=O)N%11.CC[CH](C)[CH](C(O)=O)N%10                 | 21.3_6 |
| C%11(COC1=CC=CC=C1)=O.CC(C)C[CH](C%10=O)N%11.CSCC[CH](C(O)=O)N%10                      | 21.3_7 |
| C%11(COC1=CC=CC=C1)=O.CC(C)C[CH](C%10=O)N%11.OC(C=C1)=CC=C1C[CH](C(O)=O)N%10           | 21.3_8 |
| C%11(COC1=CC=CC=C1)=O.CC(C)C[CH](C%10=O)N%11.O=C(O)[CH](CC1=C(F)C(F)=C(F)C(F)=C1F)N%10 | 21.3_9 |
| C%11(COC1=CC=CC=C1)=O.C[CH](C%10=O)N%11.O=C(O)CN%10                                    | 21.4_1 |
| C%11(COC1=CC=CC=C1)=O.C[CH](C%10=O)N%11.CC(C)[CH](C(O)=O)N%10                          | 21.4_2 |

|                                                                                              |        |
|----------------------------------------------------------------------------------------------|--------|
| C%11(COC1=CC=CC=C1)=O.C[CH](C%10=O)N%11.CC(C)C[CH](C(O)=O)N%10                               | 21.4_3 |
| C%11(COC1=CC=CC=C1)=O.C[CH](C%10=O)N%11.C[CH](C(O)=O)N%10                                    | 21.4_4 |
| C%11(COC1=CC=CC=C1)=O.C[CH](C%10=O)N%11.O=C(O)[CH](CC1=CC=CC=C1)N%10                         | 21.4_5 |
| C%11(COC1=CC=CC=C1)=O.C[CH](C%10=O)N%11.CC[CH](C)[CH](C(O)=O)N%10                            | 21.4_6 |
| C%11(COC1=CC=CC=C1)=O.C[CH](C%10=O)N%11.CSCC[CH](C(O)=O)N%10                                 | 21.4_7 |
| C%11(COC1=CC=CC=C1)=O.C[CH](C%10=O)N%11.OC(C=C1)=CC=C1C[CH](C(O)=O)N%10                      | 21.4_8 |
| C%11(COC1=CC=CC=C1)=O.C[CH](C%10=O)N%11.O=C(O)[CH](CC1=C(F)C(F)=C(F)C(F)=C1F)N%10            | 21.4_9 |
| C%11(COC1=CC=CC=C1)=O.O=C%10[CH](CC1=CC=CC=C1)N%11.O=C(O)CN%10                               | 21.5_1 |
| C%11(COC1=CC=CC=C1)=O.O=C%10[CH](CC1=CC=CC=C1)N%11.CC(C)[CH](C(O)=O)N%10                     | 21.5_2 |
| C%11(COC1=CC=CC=C1)=O.O=C%10[CH](CC1=CC=CC=C1)N%11.CC(C)C[CH](C(O)=O)N%10                    | 21.5_3 |
| C%11(COC1=CC=CC=C1)=O.O=C%10[CH](CC1=CC=CC=C1)N%11.C[CH](C(O)=O)N%10                         | 21.5_4 |
| C%11(COC1=CC=CC=C1)=O.O=C%10[CH](CC1=CC=CC=C1)N%11.O=C(O)[CH](CC1=CC=CC=C1)N%10              | 21.5_5 |
| C%11(COC1=CC=CC=C1)=O.O=C%10[CH](CC1=CC=CC=C1)N%11.CC[CH](C)[CH](C(O)=O)N%10                 | 21.5_6 |
| C%11(COC1=CC=CC=C1)=O.O=C%10[CH](CC1=CC=CC=C1)N%11.CSCC[CH](C(O)=O)N%10                      | 21.5_7 |
| C%11(COC1=CC=CC=C1)=O.O=C%10[CH](CC1=CC=CC=C1)N%11.OC(C=C1)=CC=C1C[CH](C(O)=O)N%10           | 21.5_8 |
| C%11(COC1=CC=CC=C1)=O.O=C%10[CH](CC1=CC=CC=C1)N%11.O=C(O)[CH](CC1=C(F)C(F)=C(F)C(F)=C1F)N%10 | 21.5_9 |
| C%11(COC1=CC=CC=C1)=O.CC[CH](C)[CH](C%10=O)N%11.O=C(O)CN%10                                  | 21.6_1 |
| C%11(COC1=CC=CC=C1)=O.CC[CH](C)[CH](C%10=O)N%11.CC(C)[CH](C(O)=O)N%10                        | 21.6_2 |
| C%11(COC1=CC=CC=C1)=O.CC[CH](C)[CH](C%10=O)N%11.CC(C)C[CH](C(O)=O)N%10                       | 21.6_3 |
| C%11(COC1=CC=CC=C1)=O.CC[CH](C)[CH](C%10=O)N%11.C[CH](C(O)=O)N%10                            | 21.6_4 |
| C%11(COC1=CC=CC=C1)=O.CC[CH](C)[CH](C%10=O)N%11.O=C(O)[CH](CC1=CC=CC=C1)N%10                 | 21.6_5 |
| C%11(COC1=CC=CC=C1)=O.CC[CH](C)[CH](C%10=O)N%11.CC[CH](C)[CH](C(O)=O)N%10                    | 21.6_6 |
| C%11(COC1=CC=CC=C1)=O.CC[CH](C)[CH](C%10=O)N%11.CSCC[CH](C(O)=O)N%10                         | 21.6_7 |
| C%11(COC1=CC=CC=C1)=O.CC[CH](C)[CH](C%10=O)N%11.OC(C=C1)=CC=C1C[CH](C(O)=O)N%10              | 21.6_8 |
| C%11(COC1=CC=CC=C1)=O.CC[CH](C)[CH](C%10=O)N%11.O=C(O)[CH](CC1=C(F)C(F)=C(F)C(F)=C1F)N%10    | 21.6_9 |
| C%11(COC1=CC=CC=C1)=O.CSCC[CH](C%10=O)N%11.O=C(O)CN%10                                       | 21.7_1 |
| C%11(COC1=CC=CC=C1)=O.CSCC[CH](C%10=O)N%11.CC(C)[CH](C(O)=O)N%10                             | 21.7_2 |
| C%11(COC1=CC=CC=C1)=O.CSCC[CH](C%10=O)N%11.CC(C)C[CH](C(O)=O)N%10                            | 21.7_3 |
| C%11(COC1=CC=CC=C1)=O.CSCC[CH](C%10=O)N%11.C[CH](C(O)=O)N%10                                 | 21.7_4 |
| C%11(COC1=CC=CC=C1)=O.CSCC[CH](C%10=O)N%11.O=C(O)[CH](CC1=CC=CC=C1)N%10                      | 21.7_5 |
| C%11(COC1=CC=CC=C1)=O.CSCC[CH](C%10=O)N%11.CC[CH](C)[CH](C(O)=O)N%10                         | 21.7_6 |
| C%11(COC1=CC=CC=C1)=O.CSCC[CH](C%10=O)N%11.CSCC[CH](C(O)=O)N%10                              | 21.7_7 |
| C%11(COC1=CC=CC=C1)=O.CSCC[CH](C%10=O)N%11.OC(C=C1)=CC=C1C[CH](C(O)=O)N%10                   | 21.7_8 |
| C%11(COC1=CC=CC=C1)=O.CSCC[CH](C%10=O)N%11.O=C(O)[CH](CC1=C(F)C(F)=C(F)C(F)=C1F)N%10         | 21.7_9 |
| C%11(COC1=CC=CC=C1)=O.OC(C=C1)=CC=C1C[CH](C%10=O)N%11.O=C(O)CN%10                            | 21.8_1 |

|                                                                                                 |        |
|-------------------------------------------------------------------------------------------------|--------|
| C%11(COC1=CC=CC=C1)=O.OC(C=C1)=CC=C1C[CH](C%10=O)N%11.CC(C)[CH](C(O)=O)N%10                     | 21.8_2 |
| C%11(COC1=CC=CC=C1)=O.OC(C=C1)=CC=C1C[CH](C%10=O)N%11.CC(C)C[CH](C(O)=O)N%10                    | 21.8_3 |
| C%11(COC1=CC=CC=C1)=O.OC(C=C1)=CC=C1C[CH](C%10=O)N%11.C[CH](C(O)=O)N%10                         | 21.8_4 |
| C%11(COC1=CC=CC=C1)=O.OC(C=C1)=CC=C1C[CH](C%10=O)N%11.O=C(O)[CH](CC1=CC=CC=C1)N%10              | 21.8_5 |
| C%11(COC1=CC=CC=C1)=O.OC(C=C1)=CC=C1C[CH](C%10=O)N%11.CC[CH](C)[CH](C(O)=O)N%10                 | 21.8_6 |
| C%11(COC1=CC=CC=C1)=O.OC(C=C1)=CC=C1C[CH](C%10=O)N%11.CSCC[CH](C(O)=O)N%10                      | 21.8_7 |
| C%11(COC1=CC=CC=C1)=O.OC(C=C1)=CC=C1C[CH](C%10=O)N%11.OC(C=C1)=CC=C1C[CH](C(O)=O)N%10           | 21.8_8 |
| C%11(COC1=CC=CC=C1)=O.OC(C=C1)=CC=C1C[CH](C%10=O)N%11.O=C(O)[CH](CC1=C(F)C(F)=C(F)C(F)=C1F)N%10 | 21.8_9 |
| C%10(COC1=CC=CC=C1)=O.O=C(O)CN%10                                                               | 21.9_1 |
| C%10(COC1=CC=CC=C1)=O.CC(C)[CH](C(O)=O)N%10                                                     | 21.9_2 |
| C%10(COC1=CC=CC=C1)=O.CC(C)C[CH](C(O)=O)N%10                                                    | 21.9_3 |
| C%10(COC1=CC=CC=C1)=O.C[CH](C(O)=O)N%10                                                         | 21.9_4 |
| C%10(COC1=CC=CC=C1)=O.O=C(O)[CH](CC1=CC=CC=C1)N%10                                              | 21.9_5 |
| C%10(COC1=CC=CC=C1)=O.CC[CH](C)[CH](C(O)=O)N%10                                                 | 21.9_6 |
| C%10(COC1=CC=CC=C1)=O.CSCC[CH](C(O)=O)N%10                                                      | 21.9_7 |
| C%10(COC1=CC=CC=C1)=O.OC(C=C1)=CC=C1C[CH](C(O)=O)N%10                                           | 21.9_8 |
| C%10(COC1=CC=CC=C1)=O.O=C(O)[CH](CC1=C(F)C(F)=C(F)C(F)=C1F)N%10                                 | 21.9_9 |
| C%11(OCC1C2=C(C=CC=C2)C3=CC=CC=C31)=O.O=C%10CN%11.O=C(O)CN%10                                   | 22.1_1 |
| C%11(OCC1C2=C(C=CC=C2)C3=CC=CC=C31)=O.O=C%10CN%11.CC(C)[CH](C(O)=O)N%10                         | 22.1_2 |
| C%11(OCC1C2=C(C=CC=C2)C3=CC=CC=C31)=O.O=C%10CN%11.CC(C)C[CH](C(O)=O)N%10                        | 22.1_3 |
| C%11(OCC1C2=C(C=CC=C2)C3=CC=CC=C31)=O.O=C%10CN%11.C[CH](C(O)=O)N%10                             | 22.1_4 |
| C%11(OCC1C2=C(C=CC=C2)C3=CC=CC=C31)=O.O=C%10CN%11.O=C(O)[CH](CC1=CC=CC=C1)N%10                  | 22.1_5 |
| C%11(OCC1C2=C(C=CC=C2)C3=CC=CC=C31)=O.O=C%10CN%11.CC[CH](C)[CH](C(O)=O)N%10                     | 22.1_6 |
| C%11(OCC1C2=C(C=CC=C2)C3=CC=CC=C31)=O.O=C%10CN%11.CSCC[CH](C(O)=O)N%10                          | 22.1_7 |
| C%11(OCC1C2=C(C=CC=C2)C3=CC=CC=C31)=O.O=C%10CN%11.OC(C=C1)=CC=C1C[CH](C(O)=O)N%10               | 22.1_8 |
| C%11(OCC1C2=C(C=CC=C2)C3=CC=CC=C31)=O.O=C%10CN%11.O=C(O)[CH](CC1=C(F)C(F)=C(F)C(F)=C1F)N%10     | 22.1_9 |
| C%11(OCC1C2=C(C=CC=C2)C3=CC=CC=C31)=O.CC(C)[CH](C%10=O)N%11.O=C(O)CN%10                         | 22.2_1 |
| C%11(OCC1C2=C(C=CC=C2)C3=CC=CC=C31)=O.CC(C)[CH](C%10=O)N%11.CC(C)[CH](C(O)=O)N%10               | 22.2_2 |
| C%11(OCC1C2=C(C=CC=C2)C3=CC=CC=C31)=O.CC(C)[CH](C%10=O)N%11.CC(C)C[CH](C(O)=O)N%10              | 22.2_3 |
| C%11(OCC1C2=C(C=CC=C2)C3=CC=CC=C31)=O.CC(C)[CH](C%10=O)N%11.C[CH](C(O)=O)N%10                   | 22.2_4 |
| C%11(OCC1C2=C(C=CC=C2)C3=CC=CC=C31)=O.CC(C)[CH](C%10=O)N%11.O=C(O)[CH](CC1=CC=CC=C1)N%10        | 22.2_5 |
| C%11(OCC1C2=C(C=CC=C2)C3=CC=CC=C31)=O.CC(C)[CH](C%10=O)N%11.CC[CH](C)[CH](C(O)=O)N%10           | 22.2_6 |



|                                                                                                        |        |
|--------------------------------------------------------------------------------------------------------|--------|
| C(O)=O)N%10                                                                                            |        |
| C%11(OCC1C2=C(C=CC=C2)C3=CC=CC=C31)=O.CC(C)[CH](C%10=O)N%11.CSCC[CH](C(O)=O)N%10                       | 22.2_7 |
| C%11(OCC1C2=C(C=CC=C2)C3=CC=CC=C31)=O.CC(C)[CH](C%10=O)N%11.OC(C=C1)=CC=C1C[CH](C(O)=O)N%10            | 22.2_8 |
| C%11(OCC1C2=C(C=CC=C2)C3=CC=CC=C31)=O.CC(C)[CH](C%10=O)N%11.O=C(O)[CH](CC1=C(F)C(F)=C(F)C(F)=C1F)N%10  | 22.2_9 |
| C%11(OCC1C2=C(C=CC=C2)C3=CC=CC=C31)=O.CC(C)C[CH](C%10=O)N%11.O=C(O)CN%10                               | 22.3_1 |
| C%11(OCC1C2=C(C=CC=C2)C3=CC=CC=C31)=O.CC(C)C[CH](C%10=O)N%11.CC(C)[CH](C(O)=O)N%10                     | 22.3_2 |
| C%11(OCC1C2=C(C=CC=C2)C3=CC=CC=C31)=O.CC(C)C[CH](C%10=O)N%11.CC(C)C[CH](C(O)=O)N%10                    | 22.3_3 |
| C%11(OCC1C2=C(C=CC=C2)C3=CC=CC=C31)=O.CC(C)C[CH](C%10=O)N%11.C[CH](C(O)=O)N%10                         | 22.3_4 |
| C%11(OCC1C2=C(C=CC=C2)C3=CC=CC=C31)=O.CC(C)C[CH](C%10=O)N%11.O=C(O)[CH](CC1=CC=CC=C1)N%10              | 22.3_5 |
| C%11(OCC1C2=C(C=CC=C2)C3=CC=CC=C31)=O.CC(C)C[CH](C%10=O)N%11.CC[CH](C)[CH](C(O)=O)N%10                 | 22.3_6 |
| C%11(OCC1C2=C(C=CC=C2)C3=CC=CC=C31)=O.CC(C)C[CH](C%10=O)N%11.CSCC[CH](C(O)=O)N%10                      | 22.3_7 |
| C%11(OCC1C2=C(C=CC=C2)C3=CC=CC=C31)=O.CC(C)C[CH](C%10=O)N%11.OC(C=C1)=CC=C1C[CH](C(O)=O)N%10           | 22.3_8 |
| C%11(OCC1C2=C(C=CC=C2)C3=CC=CC=C31)=O.CC(C)C[CH](C%10=O)N%11.O=C(O)[CH](CC1=C(F)C(F)=C(F)C(F)=C1F)N%10 | 22.3_9 |
| C%11(OCC1C2=C(C=CC=C2)C3=CC=CC=C31)=O.C[CH](C%10=O)N%11.O=C(O)CN%10                                    | 22.4_1 |
| C%11(OCC1C2=C(C=CC=C2)C3=CC=CC=C31)=O.C[CH](C%10=O)N%11.CC(C)[CH](C(O)=O)N%10                          | 22.4_2 |
| C%11(OCC1C2=C(C=CC=C2)C3=CC=CC=C31)=O.C[CH](C%10=O)N%11.CC(C)C[CH](C(O)=O)N%10                         | 22.4_3 |
| C%11(OCC1C2=C(C=CC=C2)C3=CC=CC=C31)=O.C[CH](C%10=O)N%11.C[CH](C(O)=O)N%10                              | 22.4_4 |
| C%11(OCC1C2=C(C=CC=C2)C3=CC=CC=C31)=O.C[CH](C%10=O)N%11.O=C(O)[CH](CC1=CC=CC=C1)N%10                   | 22.4_5 |
| C%11(OCC1C2=C(C=CC=C2)C3=CC=CC=C31)=O.C[CH](C%10=O)N%11.CC[CH](C)[CH](C(O)=O)N%10                      | 22.4_6 |
| C%11(OCC1C2=C(C=CC=C2)C3=CC=CC=C31)=O.C[CH](C%10=O)N%11.CSCC[CH](C(O)=O)N%10                           | 22.4_7 |
| C%11(OCC1C2=C(C=CC=C2)C3=CC=CC=C31)=O.C[CH](C%10=O)N%11.OC(C=C1)=CC=C1C[CH](C(O)=O)N%10                | 22.4_8 |
| C%11(OCC1C2=C(C=CC=C2)C3=CC=CC=C31)=O.C[CH](C%10=O)N%11.O=C(O)[CH](CC1=C(F)C(F)=C(F)C(F)=C1F)N%10      | 22.4_9 |
| C%11(OCC1C2=C(C=CC=C2)C3=CC=CC=C31)=O.O=C%10[CH](CC1=CC=CC=C1)N%11.O=C(O)CN%10                         | 22.5_1 |
| C%11(OCC1C2=C(C=CC=C2)C3=CC=CC=C31)=O.O=C%10[CH](CC1=CC=CC=C1)N%11.CC(C)[CH](C(O)=O)N%10               | 22.5_2 |
| C%11(OCC1C2=C(C=CC=C2)C3=CC=CC=C31)=O.O=C%10[CH](CC1=CC=CC=C1)N%11.CC(C)C[CH](C(O)=O)N%10              | 22.5_3 |
| C%11(OCC1C2=C(C=CC=C2)C3=CC=CC=C31)=O.O=C%10[CH](CC1=CC=CC=C1)N%11.C[CH](C(O)=O)N%10                   | 22.5_4 |

|                                                                                                              |        |
|--------------------------------------------------------------------------------------------------------------|--------|
| C%11(OCC1C2=C(C=CC=C2)C3=CC=CC=C31)=O.O=C%10[CH](CC1=CC=CC=C1)N%11.O=C(O)[CH](CC1=CC=CC=C1)N%10              | 22.5_5 |
| C%11(OCC1C2=C(C=CC=C2)C3=CC=CC=C31)=O.O=C%10[CH](CC1=CC=CC=C1)N%11.CC[CH](C)[CH](C(O)=O)N%10                 | 22.5_6 |
| C%11(OCC1C2=C(C=CC=C2)C3=CC=CC=C31)=O.O=C%10[CH](CC1=CC=CC=C1)N%11.CSCC[CH](C(O)=O)N%10                      | 22.5_7 |
| C%11(OCC1C2=C(C=CC=C2)C3=CC=CC=C31)=O.O=C%10[CH](CC1=CC=CC=C1)N%11.OC(C=C1)=CC=C1C[CH](C(O)=O)N%10           | 22.5_8 |
| C%11(OCC1C2=C(C=CC=C2)C3=CC=CC=C31)=O.O=C%10[CH](CC1=CC=CC=C1)N%11.O=C(O)[CH](CC1=C(F)C(F)=C(F)C(F)=C1F)N%10 | 22.5_9 |
| C%11(OCC1C2=C(C=CC=C2)C3=CC=CC=C31)=O.CC[CH](C)[CH](C%10=O)N%11.O=C(O)CN%10                                  | 22.6_1 |
| C%11(OCC1C2=C(C=CC=C2)C3=CC=CC=C31)=O.CC[CH](C)[CH](C%10=O)N%11.CC(C)[CH](C(O)=O)N%10                        | 22.6_2 |
| C%11(OCC1C2=C(C=CC=C2)C3=CC=CC=C31)=O.CC[CH](C)[CH](C%10=O)N%11.CC(C)C[CH](C(O)=O)N%10                       | 22.6_3 |
| C%11(OCC1C2=C(C=CC=C2)C3=CC=CC=C31)=O.CC[CH](C)[CH](C%10=O)N%11.C[CH](C(O)=O)N%10                            | 22.6_4 |
| C%11(OCC1C2=C(C=CC=C2)C3=CC=CC=C31)=O.CC[CH](C)[CH](C%10=O)N%11.O=C(O)[CH](CC1=CC=CC=C1)N%10                 | 22.6_5 |
| C%11(OCC1C2=C(C=CC=C2)C3=CC=CC=C31)=O.CC[CH](C)[CH](C%10=O)N%11.CC[CH](C)[CH](C(O)=O)N%10                    | 22.6_6 |
| C%11(OCC1C2=C(C=CC=C2)C3=CC=CC=C31)=O.CC[CH](C)[CH](C%10=O)N%11.CSCC[CH](C(O)=O)N%10                         | 22.6_7 |
| C%11(OCC1C2=C(C=CC=C2)C3=CC=CC=C31)=O.CC[CH](C)[CH](C%10=O)N%11.OC(C=C1)=CC=C1C[CH](C(O)=O)N%10              | 22.6_8 |
| C%11(OCC1C2=C(C=CC=C2)C3=CC=CC=C31)=O.CC[CH](C)[CH](C%10=O)N%11.O=C(O)[CH](CC1=C(F)C(F)=C(F)C(F)=C1F)N%10    | 22.6_9 |
| C%11(OCC1C2=C(C=CC=C2)C3=CC=CC=C31)=O.CSCC[CH](C%10=O)N%11.O=C(O)CN%10                                       | 22.7_1 |
| C%11(OCC1C2=C(C=CC=C2)C3=CC=CC=C31)=O.CSCC[CH](C%10=O)N%11.CC(C)[CH](C(O)=O)N%10                             | 22.7_2 |
| C%11(OCC1C2=C(C=CC=C2)C3=CC=CC=C31)=O.CSCC[CH](C%10=O)N%11.CC(C)C[CH](C(O)=O)N%10                            | 22.7_3 |
| C%11(OCC1C2=C(C=CC=C2)C3=CC=CC=C31)=O.CSCC[CH](C%10=O)N%11.C[CH](C(O)=O)N%10                                 | 22.7_4 |
| C%11(OCC1C2=C(C=CC=C2)C3=CC=CC=C31)=O.CSCC[CH](C%10=O)N%11.O=C(O)[CH](CC1=CC=CC=C1)N%10                      | 22.7_5 |
| C%11(OCC1C2=C(C=CC=C2)C3=CC=CC=C31)=O.CSCC[CH](C%10=O)N%11.CC[CH](C)[CH](C(O)=O)N%10                         | 22.7_6 |
| C%11(OCC1C2=C(C=CC=C2)C3=CC=CC=C31)=O.CSCC[CH](C%10=O)N%11.CSCC[CH](C(O)=O)N%10                              | 22.7_7 |
| C%11(OCC1C2=C(C=CC=C2)C3=CC=CC=C31)=O.CSCC[CH](C%10=O)N%11.OC(C=C1)=CC=C1C[CH](C(O)=O)N%10                   | 22.7_8 |
| C%11(OCC1C2=C(C=CC=C2)C3=CC=CC=C31)=O.CSCC[CH](C%10=O)N%11.O=C(O)[CH](CC1=C(F)C(F)=C(F)C(F)=C1F)N%10         | 22.7_9 |
| C%11(OCC1C2=C(C=CC=C2)C3=CC=CC=C31)=O.OC(C=C1)=CC=C1C[CH](C%10=O)N%11.O=C(O)CN%10                            | 22.8_1 |
| C%11(OCC1C2=C(C=CC=C2)C3=CC=CC=C31)=O.OC(C=C1)=CC=C1C[CH](C%10=O)N%11.CC(C)[CH](C(O)=O)N%10                  | 22.8_2 |

|                                                                                                                 |        |
|-----------------------------------------------------------------------------------------------------------------|--------|
| C%11(OCC1C2=C(C=CC=C2)C3=CC=CC=C31)=O.OC(C=C1)=CC=C1C[CH](C%10=O)N%11.CC(C)C[CH](C(O)=O)N%10                    | 22.8_3 |
| C%11(OCC1C2=C(C=CC=C2)C3=CC=CC=C31)=O.OC(C=C1)=CC=C1C[CH](C%10=O)N%11.C[CH](C(O)=O)N%10                         | 22.8_4 |
| C%11(OCC1C2=C(C=CC=C2)C3=CC=CC=C31)=O.OC(C=C1)=CC=C1C[CH](C%10=O)N%11.O=C(O)[CH](CC1=CC=CC=C1)N%10              | 22.8_5 |
| C%11(OCC1C2=C(C=CC=C2)C3=CC=CC=C31)=O.OC(C=C1)=CC=C1C[CH](C%10=O)N%11.CC[CH](C)[CH](C(O)=O)N%10                 | 22.8_6 |
| C%11(OCC1C2=C(C=CC=C2)C3=CC=CC=C31)=O.OC(C=C1)=CC=C1C[CH](C%10=O)N%11.CSCC[CH](C(O)=O)N%10                      | 22.8_7 |
| C%11(OCC1C2=C(C=CC=C2)C3=CC=CC=C31)=O.OC(C=C1)=CC=C1C[CH](C%10=O)N%11.O=C(C=C1)=CC=C1C[CH](C(O)=O)N%10          | 22.8_8 |
| C%11(OCC1C2=C(C=CC=C2)C3=CC=CC=C31)=O.OC(C=C1)=CC=C1C[CH](C%10=O)N%11.O=C(O)[CH](CC1=C(F)C(F)=C(F)C(F)=C1F)N%10 | 22.8_9 |
| C%10(OCC1C2=C(C=CC=C2)C3=CC=CC=C31)=O.O=C(O)CN%10                                                               | 22.9_1 |
| C%10(OCC1C2=C(C=CC=C2)C3=CC=CC=C31)=O.CC(C)[CH](C(O)=O)N%10                                                     | 22.9_2 |
| C%10(OCC1C2=C(C=CC=C2)C3=CC=CC=C31)=O.CC(C)C[CH](C(O)=O)N%10                                                    | 22.9_3 |
| C%10(OCC1C2=C(C=CC=C2)C3=CC=CC=C31)=O.C[CH](C(O)=O)N%10                                                         | 22.9_4 |
| C%10(OCC1C2=C(C=CC=C2)C3=CC=CC=C31)=O.O=C(O)[CH](CC1=CC=CC=C1)N%10                                              | 22.9_5 |
| C%10(OCC1C2=C(C=CC=C2)C3=CC=CC=C31)=O.CC[CH](C)[CH](C(O)=O)N%10                                                 | 22.9_6 |
| C%10(OCC1C2=C(C=CC=C2)C3=CC=CC=C31)=O.CSCC[CH](C(O)=O)N%10                                                      | 22.9_7 |
| C%10(OCC1C2=C(C=CC=C2)C3=CC=CC=C31)=O.OC(C=C1)=CC=C1C[CH](C(O)=O)N%10                                           | 22.9_8 |
| C%10(OCC1C2=C(C=CC=C2)C3=CC=CC=C31)=O.O=C(O)[CH](CC1=C(F)C(F)=C(F)C(F)=C1F)N%10                                 | 22.9_9 |
| C%11(COC1=CC2=CC=C(C#N)C=C2C=C1)=O.O=C%10CN%11.O=C(O)CN%10                                                      | 23.1_1 |
| C%11(COC1=CC2=CC=C(C#N)C=C2C=C1)=O.O=C%10CN%11.CC(C)[CH](C(O)=O)N%10                                            | 23.1_2 |
| C%11(COC1=CC2=CC=C(C#N)C=C2C=C1)=O.O=C%10CN%11.CC(C)C[CH](C(O)=O)N%10                                           | 23.1_3 |
| C%11(COC1=CC2=CC=C(C#N)C=C2C=C1)=O.O=C%10CN%11.C[CH](C(O)=O)N%10                                                | 23.1_4 |
| C%11(COC1=CC2=CC=C(C#N)C=C2C=C1)=O.O=C%10CN%11.O=C(O)[CH](CC1=CC=CC=C1)N%10                                     | 23.1_5 |
| C%11(COC1=CC2=CC=C(C#N)C=C2C=C1)=O.O=C%10CN%11.CC[CH](C)[CH](C(O)=O)N%10                                        | 23.1_6 |
| C%11(COC1=CC2=CC=C(C#N)C=C2C=C1)=O.O=C%10CN%11.CSCC[CH](C(O)=O)N%10                                             | 23.1_7 |
| C%11(COC1=CC2=CC=C(C#N)C=C2C=C1)=O.O=C%10CN%11.OC(C=C1)=CC=C1C[CH](C(O)=O)N%10                                  | 23.1_8 |
| C%11(COC1=CC2=CC=C(C#N)C=C2C=C1)=O.O=C%10CN%11.O=C(O)[CH](CC1=C(F)C(F)=C(F)C(F)=C1F)N%10                        | 23.1_9 |
| C%11(COC1=CC2=CC=C(C#N)C=C2C=C1)=O.CC(C)[CH](C%10=O)N%11.O=C(O)CN%10                                            | 23.2_1 |
| C%11(COC1=CC2=CC=C(C#N)C=C2C=C1)=O.CC(C)[CH](C%10=O)N%11.CC(C)[CH](C(O)=O)N%10                                  | 23.2_2 |
| C%11(COC1=CC2=CC=C(C#N)C=C2C=C1)=O.CC(C)[CH](C%10=O)N%11.CC(C)C[CH](C(O)=O)N%10                                 | 23.2_3 |
| C%11(COC1=CC2=CC=C(C#N)C=C2C=C1)=O.CC(C)[CH](C%10=O)N%11.C[CH](C(O)=O)N%10                                      | 23.2_4 |
| C%11(COC1=CC2=CC=C(C#N)C=C2C=C1)=O.CC(C)[CH](C%10=O)N%11.O=C(O)[CH](CC1=CC=CC=C1)N%10                           | 23.2_5 |
| C%11(COC1=CC2=CC=C(C#N)C=C2C=C1)=O.CC(C)[CH](C%10=O)N%11.CC[CH](C)[CH](C(O)=O)N%10                              | 23.2_6 |

|                                                                                                     |        |
|-----------------------------------------------------------------------------------------------------|--------|
| C%11(COC1=CC2=CC=C(C#N)C=C2C=C1)=O.CC(C)[CH](C%10=O)N%11.CSCC[CH](C(O)=O)N%10                       | 23.2_7 |
| C%11(COC1=CC2=CC=C(C#N)C=C2C=C1)=O.CC(C)[CH](C%10=O)N%11.OC(C=C1)=CC=C1C[CH](C(O)=O)N%10            | 23.2_8 |
| C%11(COC1=CC2=CC=C(C#N)C=C2C=C1)=O.CC(C)[CH](C%10=O)N%11.O=C(O)[CH](CC1=C(F)C(F)=C(F)C(F)=C1F)N%10  | 23.2_9 |
| C%11(COC1=CC2=CC=C(C#N)C=C2C=C1)=O.CC(C)C[CH](C%10=O)N%11.O=C(O)CN%10                               | 23.3_1 |
| C%11(COC1=CC2=CC=C(C#N)C=C2C=C1)=O.CC(C)C[CH](C%10=O)N%11.CC(C)[CH](C(O)=O)N%10                     | 23.3_2 |
| C%11(COC1=CC2=CC=C(C#N)C=C2C=C1)=O.CC(C)C[CH](C%10=O)N%11.CC(C)C[CH](C(O)=O)N%10                    | 23.3_3 |
| C%11(COC1=CC2=CC=C(C#N)C=C2C=C1)=O.CC(C)C[CH](C%10=O)N%11.C[CH](C(O)=O)N%10                         | 23.3_4 |
| C%11(COC1=CC2=CC=C(C#N)C=C2C=C1)=O.CC(C)C[CH](C%10=O)N%11.O=C(O)[CH](CC1=CC=CC=C1)N%10              | 23.3_5 |
| C%11(COC1=CC2=CC=C(C#N)C=C2C=C1)=O.CC(C)C[CH](C%10=O)N%11.CC[CH](C)[CH](C(O)=O)N%10                 | 23.3_6 |
| C%11(COC1=CC2=CC=C(C#N)C=C2C=C1)=O.CC(C)C[CH](C%10=O)N%11.CSCC[CH](C(O)=O)N%10                      | 23.3_7 |
| C%11(COC1=CC2=CC=C(C#N)C=C2C=C1)=O.CC(C)C[CH](C%10=O)N%11.OC(C=C1)=CC=C1C[CH](C(O)=O)N%10           | 23.3_8 |
| C%11(COC1=CC2=CC=C(C#N)C=C2C=C1)=O.CC(C)C[CH](C%10=O)N%11.O=C(O)[CH](CC1=C(F)C(F)=C(F)C(F)=C1F)N%10 | 23.3_9 |
| C%11(COC1=CC2=CC=C(C#N)C=C2C=C1)=O.C[CH](C%10=O)N%11.O=C(O)CN%10                                    | 23.4_1 |
| C%11(COC1=CC2=CC=C(C#N)C=C2C=C1)=O.C[CH](C%10=O)N%11.CC(C)[CH](C(O)=O)N%10                          | 23.4_2 |
| C%11(COC1=CC2=CC=C(C#N)C=C2C=C1)=O.C[CH](C%10=O)N%11.CC(C)C[CH](C(O)=O)N%10                         | 23.4_3 |
| C%11(COC1=CC2=CC=C(C#N)C=C2C=C1)=O.C[CH](C%10=O)N%11.C[CH](C(O)=O)N%10                              | 23.4_4 |
| C%11(COC1=CC2=CC=C(C#N)C=C2C=C1)=O.C[CH](C%10=O)N%11.O=C(O)[CH](CC1=CC=C(C=C1)N%10                  | 23.4_5 |
| C%11(COC1=CC2=CC=C(C#N)C=C2C=C1)=O.C[CH](C%10=O)N%11.CC[CH](C)[CH](C(O)=O)N%10                      | 23.4_6 |
| C%11(COC1=CC2=CC=C(C#N)C=C2C=C1)=O.C[CH](C%10=O)N%11.CSCC[CH](C(O)=O)N%10                           | 23.4_7 |
| C%11(COC1=CC2=CC=C(C#N)C=C2C=C1)=O.C[CH](C%10=O)N%11.OC(C=C1)=CC=C1C[CH](C(O)=O)N%10                | 23.4_8 |
| C%11(COC1=CC2=CC=C(C#N)C=C2C=C1)=O.C[CH](C%10=O)N%11.O=C(O)[CH](CC1=C(F)C(F)=C(F)C(F)=C1F)N%10      | 23.4_9 |
| C%11(COC1=CC2=CC=C(C#N)C=C2C=C1)=O.O=C%10[CH](CC1=CC=CC=C1)N%11.O=C(O)CN%10                         | 23.5_1 |
| C%11(COC1=CC2=CC=C(C#N)C=C2C=C1)=O.O=C%10[CH](CC1=CC=CC=C1)N%11.CC(C)[CH](C(O)=O)N%10               | 23.5_2 |
| C%11(COC1=CC2=CC=C(C#N)C=C2C=C1)=O.O=C%10[CH](CC1=CC=CC=C1)N%11.CC(C)C[CH](C(O)=O)N%10              | 23.5_3 |
| C%11(COC1=CC2=CC=C(C#N)C=C2C=C1)=O.O=C%10[CH](CC1=CC=CC=C1)N%11.C[CH](C(O)=O)N%10                   | 23.5_4 |
| C%11(COC1=CC2=CC=C(C#N)C=C2C=C1)=O.O=C%10[CH](CC1=CC=CC=C1)N%11.O=C(O)[CH](CC1=CC=CC=C1)N%10        | 23.5_5 |

|                                                                                                           |        |
|-----------------------------------------------------------------------------------------------------------|--------|
| C%11(COC1=CC2=CC=C(C#N)C=C2C=C1)=O.O=C%10[CH](CC1=CC=CC=C1)N%11.CC[CH](C)[CH](C(O)=O)N%10                 | 23.5_6 |
| C%11(COC1=CC2=CC=C(C#N)C=C2C=C1)=O.O=C%10[CH](CC1=CC=CC=C1)N%11.CSCC[CH](C(O)=O)N%10                      | 23.5_7 |
| C%11(COC1=CC2=CC=C(C#N)C=C2C=C1)=O.O=C%10[CH](CC1=CC=CC=C1)N%11.OC(C=C1)=CC=C1C[CH](C(O)=O)N%10           | 23.5_8 |
| C%11(COC1=CC2=CC=C(C#N)C=C2C=C1)=O.O=C%10[CH](CC1=CC=CC=C1)N%11.O=C(O)[CH](CC1=C(F)C(F)=C(F)C(F)=C1F)N%10 | 23.5_9 |
| C%11(COC1=CC2=CC=C(C#N)C=C2C=C1)=O.CC[CH](C)[CH](C%10=O)N%11.O=C(O)CN%10                                  | 23.6_1 |
| C%11(COC1=CC2=CC=C(C#N)C=C2C=C1)=O.CC[CH](C)[CH](C%10=O)N%11.CC(C)[CH](C(O)=O)N%10                        | 23.6_2 |
| C%11(COC1=CC2=CC=C(C#N)C=C2C=C1)=O.CC[CH](C)[CH](C%10=O)N%11.CC(C)C[CH](C(O)=O)N%10                       | 23.6_3 |
| C%11(COC1=CC2=CC=C(C#N)C=C2C=C1)=O.CC[CH](C)[CH](C%10=O)N%11.C[CH](C(O)=O)N%10                            | 23.6_4 |
| C%11(COC1=CC2=CC=C(C#N)C=C2C=C1)=O.CC[CH](C)[CH](C%10=O)N%11.O=C(O)[CH](CC1=CC=CC=C1)N%10                 | 23.6_5 |
| C%11(COC1=CC2=CC=C(C#N)C=C2C=C1)=O.CC[CH](C)[CH](C%10=O)N%11.CC[CH](C)[CH](C(O)=O)N%10                    | 23.6_6 |
| C%11(COC1=CC2=CC=C(C#N)C=C2C=C1)=O.CC[CH](C)[CH](C%10=O)N%11.CSCC[CH](C(O)=O)N%10                         | 23.6_7 |
| C%11(COC1=CC2=CC=C(C#N)C=C2C=C1)=O.CC[CH](C)[CH](C%10=O)N%11.OC(C=C1)=CC=C1C[CH](C(O)=O)N%10              | 23.6_8 |
| C%11(COC1=CC2=CC=C(C#N)C=C2C=C1)=O.CC[CH](C)[CH](C%10=O)N%11.O=C(O)[CH](CC1=C(F)C(F)=C(F)C(F)=C1F)N%10    | 23.6_9 |
| C%11(COC1=CC2=CC=C(C#N)C=C2C=C1)=O.CSCC[CH](C%10=O)N%11.O=C(O)CN%10                                       | 23.7_1 |
| C%11(COC1=CC2=CC=C(C#N)C=C2C=C1)=O.CSCC[CH](C%10=O)N%11.CC(C)[CH](C(O)=O)N%10                             | 23.7_2 |
| C%11(COC1=CC2=CC=C(C#N)C=C2C=C1)=O.CSCC[CH](C%10=O)N%11.CC(C)C[CH](C(O)=O)N%10                            | 23.7_3 |
| C%11(COC1=CC2=CC=C(C#N)C=C2C=C1)=O.CSCC[CH](C%10=O)N%11.C[CH](C(O)=O)N%10                                 | 23.7_4 |
| C%11(COC1=CC2=CC=C(C#N)C=C2C=C1)=O.CSCC[CH](C%10=O)N%11.O=C(O)[CH](CC1=CC=CC=C1)N%10                      | 23.7_5 |
| C%11(COC1=CC2=CC=C(C#N)C=C2C=C1)=O.CSCC[CH](C%10=O)N%11.CC[CH](C)[CH](C(O)=O)N%10                         | 23.7_6 |
| C%11(COC1=CC2=CC=C(C#N)C=C2C=C1)=O.CSCC[CH](C%10=O)N%11.CSCC[CH](C(O)=O)N%10                              | 23.7_7 |
| C%11(COC1=CC2=CC=C(C#N)C=C2C=C1)=O.CSCC[CH](C%10=O)N%11.OC(C=C1)=CC=C1C[CH](C(O)=O)N%10                   | 23.7_8 |
| C%11(COC1=CC2=CC=C(C#N)C=C2C=C1)=O.CSCC[CH](C%10=O)N%11.O=C(O)[CH](CC1=C(F)C(F)=C(F)C(F)=C1F)N%10         | 23.7_9 |
| C%11(COC1=CC2=CC=C(C#N)C=C2C=C1)=O.OC(C=C1)=CC=C1C[CH](C%10=O)N%11.O=C(O)CN%10                            | 23.8_1 |
| C%11(COC1=CC2=CC=C(C#N)C=C2C=C1)=O.OC(C=C1)=CC=C1C[CH](C%10=O)N%11.CC(C)[CH](C(O)=O)N%10                  | 23.8_2 |
| C%11(COC1=CC2=CC=C(C#N)C=C2C=C1)=O.OC(C=C1)=CC=C1C[CH](C%10=O)N%11.CC(C)C[CH](C(O)=O)N%10                 | 23.8_3 |
| C%11(COC1=CC2=CC=C(C#N)C=C2C=C1)=O.OC(C=C1)=CC=C1C[CH](C%10=O)N%11.C[CH]                                  | 23.8_4 |

|                                                                                                               |        |
|---------------------------------------------------------------------------------------------------------------|--------|
| (C(O)=O)N%10                                                                                                  |        |
| C%11(COC1=CC2=CC=C(C#N)C=C2C=C1)=O.O=C(C=C1)=CC=C1C[CH](C%10=O)N%11.O=C(O)[CH](CC1=CC=CC=C1)N%10              | 23.8_5 |
| C%11(COC1=CC2=CC=C(C#N)C=C2C=C1)=O.O=C(C=C1)=CC=C1C[CH](C%10=O)N%11.CC[CH](C)[CH](C(O)=O)N%10                 | 23.8_6 |
| C%11(COC1=CC2=CC=C(C#N)C=C2C=C1)=O.O=C(C=C1)=CC=C1C[CH](C%10=O)N%11.CSCC[CH](C(O)=O)N%10                      | 23.8_7 |
| C%11(COC1=CC2=CC=C(C#N)C=C2C=C1)=O.O=C(C=C1)=CC=C1C[CH](C%10=O)N%11.O=C(C=C1)=CC=C1C[CH](C(O)=O)N%10          | 23.8_8 |
| C%11(COC1=CC2=CC=C(C#N)C=C2C=C1)=O.O=C(C=C1)=CC=C1C[CH](C%10=O)N%11.O=C(O)[CH](CC1=C(F)C(F)=C(F)C(F)=C1F)N%10 | 23.8_9 |
| C%10(COC1=CC2=CC=C(C#N)C=C2C=C1)=O.O=C(O)CN%10                                                                | 23.9_1 |
| C%10(COC1=CC2=CC=C(C#N)C=C2C=C1)=O.CC(C)[CH](C(O)=O)N%10                                                      | 23.9_2 |
| C%10(COC1=CC2=CC=C(C#N)C=C2C=C1)=O.CC(C)C[CH](C(O)=O)N%10                                                     | 23.9_3 |
| C%10(COC1=CC2=CC=C(C#N)C=C2C=C1)=O.C[CH](C(O)=O)N%10                                                          | 23.9_4 |
| C%10(COC1=CC2=CC=C(C#N)C=C2C=C1)=O.O=C(O)[CH](CC1=CC=CC=C1)N%10                                               | 23.9_5 |
| C%10(COC1=CC2=CC=C(C#N)C=C2C=C1)=O.CC[CH](C)[CH](C(O)=O)N%10                                                  | 23.9_6 |
| C%10(COC1=CC2=CC=C(C#N)C=C2C=C1)=O.CSCC[CH](C(O)=O)N%10                                                       | 23.9_7 |
| C%10(COC1=CC2=CC=C(C#N)C=C2C=C1)=O.O=C(C=C1)=CC=C1C[CH](C(O)=O)N%10                                           | 23.9_8 |
| C%10(COC1=CC2=CC=C(C#N)C=C2C=C1)=O.O=C(O)[CH](CC1=C(F)C(F)=C(F)C(F)=C1F)N%10                                  | 23.9_9 |
| C%11(COC1=CC2=CC=C(OC)C=C2C=C1)=O.O=C%10CN%11.O=C(O)CN%10                                                     | 24.1_1 |
| C%11(COC1=CC2=CC=C(OC)C=C2C=C1)=O.O=C%10CN%11.CC(C)[CH](C(O)=O)N%10                                           | 24.1_2 |
| C%11(COC1=CC2=CC=C(OC)C=C2C=C1)=O.O=C%10CN%11.CC(C)C[CH](C(O)=O)N%10                                          | 24.1_3 |
| C%11(COC1=CC2=CC=C(OC)C=C2C=C1)=O.O=C%10CN%11.C[CH](C(O)=O)N%10                                               | 24.1_4 |
| C%11(COC1=CC2=CC=C(OC)C=C2C=C1)=O.O=C%10CN%11.O=C(O)[CH](CC1=CC=CC=C1)N%10                                    | 24.1_5 |
| C%11(COC1=CC2=CC=C(OC)C=C2C=C1)=O.O=C%10CN%11.CC[CH](C)[CH](C(O)=O)N%10                                       | 24.1_6 |
| C%11(COC1=CC2=CC=C(OC)C=C2C=C1)=O.O=C%10CN%11.CSCC[CH](C(O)=O)N%10                                            | 24.1_7 |
| C%11(COC1=CC2=CC=C(OC)C=C2C=C1)=O.O=C%10CN%11.O=C(C=C1)=CC=C1C[CH](C(O)=O)N%10                                | 24.1_8 |
| C%11(COC1=CC2=CC=C(OC)C=C2C=C1)=O.O=C%10CN%11.O=C(O)[CH](CC1=C(F)C(F)=C(F)C(F)=C1F)N%10                       | 24.1_9 |
| C%11(COC1=CC2=CC=C(OC)C=C2C=C1)=O.CC(C)[CH](C%10=O)N%11.O=C(O)CN%10                                           | 24.2_1 |
| C%11(COC1=CC2=CC=C(OC)C=C2C=C1)=O.CC(C)[CH](C%10=O)N%11.CC(C)[CH](C(O)=O)N%10                                 | 24.2_2 |
| C%11(COC1=CC2=CC=C(OC)C=C2C=C1)=O.CC(C)[CH](C%10=O)N%11.CC(C)C[CH](C(O)=O)N%10                                | 24.2_3 |
| C%11(COC1=CC2=CC=C(OC)C=C2C=C1)=O.CC(C)[CH](C%10=O)N%11.C[CH](C(O)=O)N%10                                     | 24.2_4 |
| C%11(COC1=CC2=CC=C(OC)C=C2C=C1)=O.CC(C)[CH](C%10=O)N%11.O=C(O)[CH](CC1=CC=CC=C1)N%10                          | 24.2_5 |
| C%11(COC1=CC2=CC=C(OC)C=C2C=C1)=O.CC(C)[CH](C%10=O)N%11.CC[CH](C)[CH](C(O)=O)N%10                             | 24.2_6 |
| C%11(COC1=CC2=CC=C(OC)C=C2C=C1)=O.CC(C)[CH](C%10=O)N%11.CSCC[CH](C(O)=O)N%10                                  | 24.2_7 |
| C%11(COC1=CC2=CC=C(OC)C=C2C=C1)=O.CC(C)[CH](C%10=O)N%11.O=C(C=C1)=CC=C1C[CH](C(O)=O)N%10                      | 24.2_8 |

|                                                                                                    |        |
|----------------------------------------------------------------------------------------------------|--------|
| C%11(COC1=CC2=CC=C(OC)C=C2C=C1)=O.CC(C)[CH](C%10=O)N%11.O=C(O)[CH](CC1=C(F)C(F)=C(F)C(F)=C1F)N%10  | 24.2_9 |
| C%11(COC1=CC2=CC=C(OC)C=C2C=C1)=O.CC(C)C[CH](C%10=O)N%11.O=C(O)CN%10                               | 24.3_1 |
| C%11(COC1=CC2=CC=C(OC)C=C2C=C1)=O.CC(C)C[CH](C%10=O)N%11.CC(C)[CH](C(O)=O)N%10                     | 24.3_2 |
| C%11(COC1=CC2=CC=C(OC)C=C2C=C1)=O.CC(C)C[CH](C%10=O)N%11.CC(C)C[CH](C(O)=O)N%10                    | 24.3_3 |
| C%11(COC1=CC2=CC=C(OC)C=C2C=C1)=O.CC(C)C[CH](C%10=O)N%11.C[CH](C(O)=O)N%10                         | 24.3_4 |
| C%11(COC1=CC2=CC=C(OC)C=C2C=C1)=O.CC(C)C[CH](C%10=O)N%11.O=C(O)[CH](CC1=C(C)=CC=C1)N%10            | 24.3_5 |
| C%11(COC1=CC2=CC=C(OC)C=C2C=C1)=O.CC(C)C[CH](C%10=O)N%11.CC[CH](C)[CH](C(O)=O)N%10                 | 24.3_6 |
| C%11(COC1=CC2=CC=C(OC)C=C2C=C1)=O.CC(C)C[CH](C%10=O)N%11.CSCC[CH](C(O)=O)N%10                      | 24.3_7 |
| C%11(COC1=CC2=CC=C(OC)C=C2C=C1)=O.CC(C)C[CH](C%10=O)N%11.OC(C=C1)=CC=C1C[CH](C(O)=O)N%10           | 24.3_8 |
| C%11(COC1=CC2=CC=C(OC)C=C2C=C1)=O.CC(C)C[CH](C%10=O)N%11.O=C(O)[CH](CC1=C(F)C(F)=C(F)C(F)=C1F)N%10 | 24.3_9 |
| C%11(COC1=CC2=CC=C(OC)C=C2C=C1)=O.C[CH](C%10=O)N%11.O=C(O)CN%10                                    | 24.4_1 |
| C%11(COC1=CC2=CC=C(OC)C=C2C=C1)=O.C[CH](C%10=O)N%11.CC(C)[CH](C(O)=O)N%10                          | 24.4_2 |
| C%11(COC1=CC2=CC=C(OC)C=C2C=C1)=O.C[CH](C%10=O)N%11.CC(C)C[CH](C(O)=O)N%10                         | 24.4_3 |
| C%11(COC1=CC2=CC=C(OC)C=C2C=C1)=O.C[CH](C%10=O)N%11.C[CH](C(O)=O)N%10                              | 24.4_4 |
| C%11(COC1=CC2=CC=C(OC)C=C2C=C1)=O.C[CH](C%10=O)N%11.O=C(O)[CH](CC1=CC=CC=C1)N%10                   | 24.4_5 |
| C%11(COC1=CC2=CC=C(OC)C=C2C=C1)=O.C[CH](C%10=O)N%11.CC[CH](C)[CH](C(O)=O)N%10                      | 24.4_6 |
| C%11(COC1=CC2=CC=C(OC)C=C2C=C1)=O.C[CH](C%10=O)N%11.CSCC[CH](C(O)=O)N%10                           | 24.4_7 |
| C%11(COC1=CC2=CC=C(OC)C=C2C=C1)=O.C[CH](C%10=O)N%11.OC(C=C1)=CC=C1C[CH](C(O)=O)N%10                | 24.4_8 |
| C%11(COC1=CC2=CC=C(OC)C=C2C=C1)=O.C[CH](C%10=O)N%11.O=C(O)[CH](CC1=C(F)C(F)=C(F)C(F)=C1F)N%10      | 24.4_9 |
| C%11(COC1=CC2=CC=C(OC)C=C2C=C1)=O.O=C%10[CH](CC1=CC=CC=C1)N%11.O=C(O)CN%10                         | 24.5_1 |
| C%11(COC1=CC2=CC=C(OC)C=C2C=C1)=O.O=C%10[CH](CC1=CC=CC=C1)N%11.CC(C)[CH](C(O)=O)N%10               | 24.5_2 |
| C%11(COC1=CC2=CC=C(OC)C=C2C=C1)=O.O=C%10[CH](CC1=CC=CC=C1)N%11.CC(C)C[CH](C(O)=O)N%10              | 24.5_3 |
| C%11(COC1=CC2=CC=C(OC)C=C2C=C1)=O.O=C%10[CH](CC1=CC=CC=C1)N%11.C[CH](C(O)=O)N%10                   | 24.5_4 |
| C%11(COC1=CC2=CC=C(OC)C=C2C=C1)=O.O=C%10[CH](CC1=CC=CC=C1)N%11.O=C(O)[CH](CC1=CC=CC=C1)N%10        | 24.5_5 |
| C%11(COC1=CC2=CC=C(OC)C=C2C=C1)=O.O=C%10[CH](CC1=CC=CC=C1)N%11.CC[CH](C)[CH](C(O)=O)N%10           | 24.5_6 |
| C%11(COC1=CC2=CC=C(OC)C=C2C=C1)=O.O=C%10[CH](CC1=CC=CC=C1)N%11.CSCC[CH](C(O)=O)N%10                | 24.5_7 |
| C%11(COC1=CC2=CC=C(OC)C=C2C=C1)=O.O=C%10[CH](CC1=CC=CC=C1)N%11.OC(C=C1)=CC=C1C[CH](C(O)=O)N%10     | 24.5_8 |

|                                                                                                          |        |
|----------------------------------------------------------------------------------------------------------|--------|
| C%11(COC1=CC2=CC=C(OC)C=C2C=C1)=O.O=C%10[CH](CC1=CC=CC=C1)N%11.O=C(O)[CH](CC1=C(F)C(F)=C(F)C(F)=C1F)N%10 | 24.5_9 |
| C%11(COC1=CC2=CC=C(OC)C=C2C=C1)=O.CC[CH](C)[CH](C%10=O)N%11.O=C(O)CN%10                                  | 24.6_1 |
| C%11(COC1=CC2=CC=C(OC)C=C2C=C1)=O.CC[CH](C)[CH](C%10=O)N%11.CC(C)[CH](C(O)=O)N%10                        | 24.6_2 |
| C%11(COC1=CC2=CC=C(OC)C=C2C=C1)=O.CC[CH](C)[CH](C%10=O)N%11.CC(C)C[CH](C(O)=O)N%10                       | 24.6_3 |
| C%11(COC1=CC2=CC=C(OC)C=C2C=C1)=O.CC[CH](C)[CH](C%10=O)N%11.C[CH](C(O)=O)N%10                            | 24.6_4 |
| C%11(COC1=CC2=CC=C(OC)C=C2C=C1)=O.CC[CH](C)[CH](C%10=O)N%11.O=C(O)[CH](CC1=CC=CC=C1)N%10                 | 24.6_5 |
| C%11(COC1=CC2=CC=C(OC)C=C2C=C1)=O.CC[CH](C)[CH](C%10=O)N%11.CC[CH](C)[CH](C(O)=O)N%10                    | 24.6_6 |
| C%11(COC1=CC2=CC=C(OC)C=C2C=C1)=O.CC[CH](C)[CH](C%10=O)N%11.CSCC[CH](C(O)=O)N%10                         | 24.6_7 |
| C%11(COC1=CC2=CC=C(OC)C=C2C=C1)=O.CC[CH](C)[CH](C%10=O)N%11.OC(C=C1)=CC=C1C[CH](C(O)=O)N%10              | 24.6_8 |
| C%11(COC1=CC2=CC=C(OC)C=C2C=C1)=O.CC[CH](C)[CH](C%10=O)N%11.O=C(O)[CH](CC1=C(F)C(F)=C(F)C(F)=C1F)N%10    | 24.6_9 |
| C%11(COC1=CC2=CC=C(OC)C=C2C=C1)=O.CSCC[CH](C%10=O)N%11.O=C(O)CN%10                                       | 24.7_1 |
| C%11(COC1=CC2=CC=C(OC)C=C2C=C1)=O.CSCC[CH](C%10=O)N%11.CC(C)[CH](C(O)=O)N%10                             | 24.7_2 |
| C%11(COC1=CC2=CC=C(OC)C=C2C=C1)=O.CSCC[CH](C%10=O)N%11.CC(C)C[CH](C(O)=O)N%10                            | 24.7_3 |
| C%11(COC1=CC2=CC=C(OC)C=C2C=C1)=O.CSCC[CH](C%10=O)N%11.C[CH](C(O)=O)N%10                                 | 24.7_4 |
| C%11(COC1=CC2=CC=C(OC)C=C2C=C1)=O.CSCC[CH](C%10=O)N%11.O=C(O)[CH](CC1=CC=CC=C1)N%10                      | 24.7_5 |
| C%11(COC1=CC2=CC=C(OC)C=C2C=C1)=O.CSCC[CH](C%10=O)N%11.CC[CH](C)[CH](C(O)=O)N%10                         | 24.7_6 |
| C%11(COC1=CC2=CC=C(OC)C=C2C=C1)=O.CSCC[CH](C%10=O)N%11.CSCC[CH](C(O)=O)N%10                              | 24.7_7 |
| C%11(COC1=CC2=CC=C(OC)C=C2C=C1)=O.CSCC[CH](C%10=O)N%11.OC(C=C1)=CC=C1C[CH](C(O)=O)N%10                   | 24.7_8 |
| C%11(COC1=CC2=CC=C(OC)C=C2C=C1)=O.CSCC[CH](C%10=O)N%11.O=C(O)[CH](CC1=C(F)C(F)=C(F)C(F)=C1F)N%10         | 24.7_9 |
| C%11(COC1=CC2=CC=C(OC)C=C2C=C1)=O.OC(C=C1)=CC=C1C[CH](C%10=O)N%11.O=C(O)CN%10                            | 24.8_1 |
| C%11(COC1=CC2=CC=C(OC)C=C2C=C1)=O.OC(C=C1)=CC=C1C[CH](C%10=O)N%11.CC(C)[CH](C(O)=O)N%10                  | 24.8_2 |
| C%11(COC1=CC2=CC=C(OC)C=C2C=C1)=O.OC(C=C1)=CC=C1C[CH](C%10=O)N%11.CC(C)C[CH](C(O)=O)N%10                 | 24.8_3 |
| C%11(COC1=CC2=CC=C(OC)C=C2C=C1)=O.OC(C=C1)=CC=C1C[CH](C%10=O)N%11.C[CH](C(O)=O)N%10                      | 24.8_4 |
| C%11(COC1=CC2=CC=C(OC)C=C2C=C1)=O.OC(C=C1)=CC=C1C[CH](C%10=O)N%11.O=C(O)[CH](CC1=CC=CC=C1)N%10           | 24.8_5 |
| C%11(COC1=CC2=CC=C(OC)C=C2C=C1)=O.OC(C=C1)=CC=C1C[CH](C%10=O)N%11.CC[CH](C)[CH](C(O)=O)N%10              | 24.8_6 |
| C%11(COC1=CC2=CC=C(OC)C=C2C=C1)=O.OC(C=C1)=CC=C1C[CH](C%10=O)N%11.CSCC[CH](C(O)=O)N%10                   | 24.8_7 |



|                                                                                                              |        |
|--------------------------------------------------------------------------------------------------------------|--------|
| C%11(COC1=CC2=CC=C(OC)C=C2C=C1)=O.O.C(C=C1)=CC=C1C[CH](C%10=O)N%11.O.C(C=C1)=CC=C1C[CH](C(O)=O)N%10          | 24.8_8 |
| C%11(COC1=CC2=CC=C(OC)C=C2C=C1)=O.O.C(C=C1)=CC=C1C[CH](C%10=O)N%11.O=C(O)[CH](CC1=C(F)C(F)=C(F)C(F)=C1F)N%10 | 24.8_9 |
| C%10(COC1=CC2=CC=C(OC)C=C2C=C1)=O.O=C(O)CN%10                                                                | 24.9_1 |
| C%10(COC1=CC2=CC=C(OC)C=C2C=C1)=O.CC(C)[CH](C(O)=O)N%10                                                      | 24.9_2 |
| C%10(COC1=CC2=CC=C(OC)C=C2C=C1)=O.CC(C)C[CH](C(O)=O)N%10                                                     | 24.9_3 |
| C%10(COC1=CC2=CC=C(OC)C=C2C=C1)=O.C[CH](C(O)=O)N%10                                                          | 24.9_4 |
| C%10(COC1=CC2=CC=C(OC)C=C2C=C1)=O.O=C(O)[CH](CC1=CC=CC=C1)N%10                                               | 24.9_5 |
| C%10(COC1=CC2=CC=C(OC)C=C2C=C1)=O.CC[CH](C)[CH](C(O)=O)N%10                                                  | 24.9_6 |
| C%10(COC1=CC2=CC=C(OC)C=C2C=C1)=O.CSCC[CH](C(O)=O)N%10                                                       | 24.9_7 |
| C%10(COC1=CC2=CC=C(OC)C=C2C=C1)=O.O.C(C=C1)=CC=C1C[CH](C(O)=O)N%10                                           | 24.9_8 |
| C%10(COC1=CC2=CC=C(OC)C=C2C=C1)=O.O=C(O)[CH](CC1=C(F)C(F)=C(F)C(F)=C1F)N%10                                  | 24.9_9 |
| C%11(COC1=CC2=CC=C(Br)C=C2C=C1)=O.O=C%10CN%11.O=C(O)CN%10                                                    | 25.1_1 |
| C%11(COC1=CC2=CC=C(Br)C=C2C=C1)=O.O=C%10CN%11.CC(C)[CH](C(O)=O)N%10                                          | 25.1_2 |
| C%11(COC1=CC2=CC=C(Br)C=C2C=C1)=O.O=C%10CN%11.CC(C)C[CH](C(O)=O)N%10                                         | 25.1_3 |
| C%11(COC1=CC2=CC=C(Br)C=C2C=C1)=O.O=C%10CN%11.C[CH](C(O)=O)N%10                                              | 25.1_4 |
| C%11(COC1=CC2=CC=C(Br)C=C2C=C1)=O.O=C%10CN%11.O=C(O)[CH](CC1=CC=CC=C1)N%10                                   | 25.1_5 |
| C%11(COC1=CC2=CC=C(Br)C=C2C=C1)=O.O=C%10CN%11.CC[CH](C)[CH](C(O)=O)N%10                                      | 25.1_6 |
| C%11(COC1=CC2=CC=C(Br)C=C2C=C1)=O.O=C%10CN%11.CSCC[CH](C(O)=O)N%10                                           | 25.1_7 |
| C%11(COC1=CC2=CC=C(Br)C=C2C=C1)=O.O=C%10CN%11.O.C(C=C1)=CC=C1C[CH](C(O)=O)N%10                               | 25.1_8 |
| C%11(COC1=CC2=CC=C(Br)C=C2C=C1)=O.O=C%10CN%11.O=C(O)[CH](CC1=C(F)C(F)=C(F)C(F)=C1F)N%10                      | 25.1_9 |
| C%11(COC1=CC2=CC=C(Br)C=C2C=C1)=O.CC(C)[CH](C%10=O)N%11.O=C(O)CN%10                                          | 25.2_1 |
| C%11(COC1=CC2=CC=C(Br)C=C2C=C1)=O.CC(C)[CH](C%10=O)N%11.CC(C)[CH](C(O)=O)N%10                                | 25.2_2 |
| C%11(COC1=CC2=CC=C(Br)C=C2C=C1)=O.CC(C)[CH](C%10=O)N%11.CC(C)C[CH](C(O)=O)N%10                               | 25.2_3 |
| C%11(COC1=CC2=CC=C(Br)C=C2C=C1)=O.CC(C)[CH](C%10=O)N%11.C[CH](C(O)=O)N%10                                    | 25.2_4 |
| C%11(COC1=CC2=CC=C(Br)C=C2C=C1)=O.CC(C)[CH](C%10=O)N%11.O=C(O)[CH](CC1=CC=CC=C1)N%10                         | 25.2_5 |
| C%11(COC1=CC2=CC=C(Br)C=C2C=C1)=O.CC(C)[CH](C%10=O)N%11.CC[CH](C)[CH](C(O)=O)N%10                            | 25.2_6 |
| C%11(COC1=CC2=CC=C(Br)C=C2C=C1)=O.CC(C)[CH](C%10=O)N%11.CSCC[CH](C(O)=O)N%10                                 | 25.2_7 |
| C%11(COC1=CC2=CC=C(Br)C=C2C=C1)=O.CC(C)[CH](C%10=O)N%11.O.C(C=C1)=CC=C1C[CH](C(O)=O)N%10                     | 25.2_8 |
| C%11(COC1=CC2=CC=C(Br)C=C2C=C1)=O.CC(C)[CH](C%10=O)N%11.O=C(O)[CH](CC1=C(F)C(F)=C(F)C(F)=C1F)N%10            | 25.2_9 |
| C%11(COC1=CC2=CC=C(Br)C=C2C=C1)=O.CC(C)C[CH](C%10=O)N%11.O=C(O)CN%10                                         | 25.3_1 |
| C%11(COC1=CC2=CC=C(Br)C=C2C=C1)=O.CC(C)C[CH](C%10=O)N%11.CC(C)[CH](C(O)=O)N%10                               | 25.3_2 |
| C%11(COC1=CC2=CC=C(Br)C=C2C=C1)=O.CC(C)C[CH](C%10=O)N%11.CC(C)C[CH](C(O)=O)N%10                              | 25.3_3 |
| C%11(COC1=CC2=CC=C(Br)C=C2C=C1)=O.CC(C)C[CH](C%10=O)N%11.C[CH](C(O)=O)N%10                                   | 25.3_4 |

|                                                                                                              |        |
|--------------------------------------------------------------------------------------------------------------|--------|
| 0                                                                                                            |        |
| C%11(COC1=CC2=CC=C(Br)C=C2C=C1)=O.CC(C)C[CH](C%10=O)N%11.O=C(O)[CH](CC1=C<br>C=CC=C1)N%10                    | 25.3_5 |
| C%11(COC1=CC2=CC=C(Br)C=C2C=C1)=O.CC(C)C[CH](C%10=O)N%11.CC[CH](C)[CH](C(O)<br>=O)N%10                       | 25.3_6 |
| C%11(COC1=CC2=CC=C(Br)C=C2C=C1)=O.CC(C)C[CH](C%10=O)N%11.CSCC[CH](C(O)=O)N<br>%10                            | 25.3_7 |
| C%11(COC1=CC2=CC=C(Br)C=C2C=C1)=O.CC(C)C[CH](C%10=O)N%11.OC(C=C1)=CC=C1C[<br>CH](C(O)=O)N%10                 | 25.3_8 |
| C%11(COC1=CC2=CC=C(Br)C=C2C=C1)=O.CC(C)C[CH](C%10=O)N%11.O=C(O)[CH](CC1=C(<br>F)C(F)=C(F)C(F)=C1F)N%10       | 25.3_9 |
| C%11(COC1=CC2=CC=C(Br)C=C2C=C1)=O.C[CH](C%10=O)N%11.O=C(O)CN%10                                              | 25.4_1 |
| C%11(COC1=CC2=CC=C(Br)C=C2C=C1)=O.C[CH](C%10=O)N%11.CC(C)[CH](C(O)=O)N%10                                    | 25.4_2 |
| C%11(COC1=CC2=CC=C(Br)C=C2C=C1)=O.C[CH](C%10=O)N%11.CC(C)C[CH](C(O)=O)N%1<br>0                               | 25.4_3 |
| C%11(COC1=CC2=CC=C(Br)C=C2C=C1)=O.C[CH](C%10=O)N%11.C[CH](C(O)=O)N%10                                        | 25.4_4 |
| C%11(COC1=CC2=CC=C(Br)C=C2C=C1)=O.C[CH](C%10=O)N%11.O=C(O)[CH](CC1=CC=CC=<br>C1)N%10                         | 25.4_5 |
| C%11(COC1=CC2=CC=C(Br)C=C2C=C1)=O.C[CH](C%10=O)N%11.CC[CH](C)[CH](C(O)=O)N<br>%10                            | 25.4_6 |
| C%11(COC1=CC2=CC=C(Br)C=C2C=C1)=O.C[CH](C%10=O)N%11.CSCC[CH](C(O)=O)N%10                                     | 25.4_7 |
| C%11(COC1=CC2=CC=C(Br)C=C2C=C1)=O.C[CH](C%10=O)N%11.OC(C=C1)=CC=C1C[CH](C<br>(O)=O)N%10                      | 25.4_8 |
| C%11(COC1=CC2=CC=C(Br)C=C2C=C1)=O.C[CH](C%10=O)N%11.O=C(O)[CH](CC1=C(F)C(F)<br>=C(F)C(F)=C1F)N%10            | 25.4_9 |
| C%11(COC1=CC2=CC=C(Br)C=C2C=C1)=O.O=C%10[CH](CC1=CC=CC=C1)N%11.O=C(O)CN<br>%10                               | 25.5_1 |
| C%11(COC1=CC2=CC=C(Br)C=C2C=C1)=O.O=C%10[CH](CC1=CC=CC=C1)N%11.CC(C)[CH](<br>C(O)=O)N%10                     | 25.5_2 |
| C%11(COC1=CC2=CC=C(Br)C=C2C=C1)=O.O=C%10[CH](CC1=CC=CC=C1)N%11.CC(C)C[CH]<br>(C(O)=O)N%10                    | 25.5_3 |
| C%11(COC1=CC2=CC=C(Br)C=C2C=C1)=O.O=C%10[CH](CC1=CC=CC=C1)N%11.C[CH](C(O)<br>=O)N%10                         | 25.5_4 |
| C%11(COC1=CC2=CC=C(Br)C=C2C=C1)=O.O=C%10[CH](CC1=CC=CC=C1)N%11.O=C(O)[CH<br>](CC1=CC=CC=C1)N%10              | 25.5_5 |
| C%11(COC1=CC2=CC=C(Br)C=C2C=C1)=O.O=C%10[CH](CC1=CC=CC=C1)N%11.CC[CH](C)[<br>CH](C(O)=O)N%10                 | 25.5_6 |
| C%11(COC1=CC2=CC=C(Br)C=C2C=C1)=O.O=C%10[CH](CC1=CC=CC=C1)N%11.CSCC[CH](<br>C(O)=O)N%10                      | 25.5_7 |
| C%11(COC1=CC2=CC=C(Br)C=C2C=C1)=O.O=C%10[CH](CC1=CC=CC=C1)N%11.OC(C=C1)=<br>CC=C1C[CH](C(O)=O)N%10           | 25.5_8 |
| C%11(COC1=CC2=CC=C(Br)C=C2C=C1)=O.O=C%10[CH](CC1=CC=CC=C1)N%11.O=C(O)[CH<br>](CC1=C(F)C(F)=C(F)C(F)=C1F)N%10 | 25.5_9 |
| C%11(COC1=CC2=CC=C(Br)C=C2C=C1)=O.CC[CH](C)[CH](C%10=O)N%11.O=C(O)CN%10                                      | 25.6_1 |
| C%11(COC1=CC2=CC=C(Br)C=C2C=C1)=O.CC[CH](C)[CH](C%10=O)N%11.CC(C)[CH](C(O)=<br>O)N%10                        | 25.6_2 |
| C%11(COC1=CC2=CC=C(Br)C=C2C=C1)=O.CC[CH](C)[CH](C%10=O)N%11.CC(C)C[CH](C(O)<br>=O)N%10                       | 25.6_3 |

|                                                                                                             |        |
|-------------------------------------------------------------------------------------------------------------|--------|
| C%11(COC1=CC2=CC=C(Br)C=C2C=C1)=O.CC[CH](C)[CH](C%10=O)N%11.C[CH](C(O)=O)N%10                               | 25.6_4 |
| C%11(COC1=CC2=CC=C(Br)C=C2C=C1)=O.CC[CH](C)[CH](C%10=O)N%11.O=C(O)[CH](CC1=CC=CC=C1)N%10                    | 25.6_5 |
| C%11(COC1=CC2=CC=C(Br)C=C2C=C1)=O.CC[CH](C)[CH](C%10=O)N%11.CC[CH](C)[CH](C(O)=O)N%10                       | 25.6_6 |
| C%11(COC1=CC2=CC=C(Br)C=C2C=C1)=O.CC[CH](C)[CH](C%10=O)N%11.CSCC[CH](C(O)=O)N%10                            | 25.6_7 |
| C%11(COC1=CC2=CC=C(Br)C=C2C=C1)=O.CC[CH](C)[CH](C%10=O)N%11.OC(C=C1)=CC=C1C[CH](C(O)=O)N%10                 | 25.6_8 |
| C%11(COC1=CC2=CC=C(Br)C=C2C=C1)=O.CC[CH](C)[CH](C%10=O)N%11.O=C(O)[CH](CC1=C(F)C(F)=C(F)C(F)=C1F)N%10       | 25.6_9 |
| C%11(COC1=CC2=CC=C(Br)C=C2C=C1)=O.CSCC[CH](C%10=O)N%11.O=C(O)CN%10                                          | 25.7_1 |
| C%11(COC1=CC2=CC=C(Br)C=C2C=C1)=O.CSCC[CH](C%10=O)N%11.CC(C)[CH](C(O)=O)N%10                                | 25.7_2 |
| C%11(COC1=CC2=CC=C(Br)C=C2C=C1)=O.CSCC[CH](C%10=O)N%11.CC(C)C[CH](C(O)=O)N%10                               | 25.7_3 |
| C%11(COC1=CC2=CC=C(Br)C=C2C=C1)=O.CSCC[CH](C%10=O)N%11.C[CH](C(O)=O)N%10                                    | 25.7_4 |
| C%11(COC1=CC2=CC=C(Br)C=C2C=C1)=O.CSCC[CH](C%10=O)N%11.O=C(O)[CH](CC1=CC=CC=C1)N%10                         | 25.7_5 |
| C%11(COC1=CC2=CC=C(Br)C=C2C=C1)=O.CSCC[CH](C%10=O)N%11.CC[CH](C)[CH](C(O)=O)N%10                            | 25.7_6 |
| C%11(COC1=CC2=CC=C(Br)C=C2C=C1)=O.CSCC[CH](C%10=O)N%11.CSCC[CH](C(O)=O)N%10                                 | 25.7_7 |
| C%11(COC1=CC2=CC=C(Br)C=C2C=C1)=O.CSCC[CH](C%10=O)N%11.OC(C=C1)=CC=C1C[CH](C(O)=O)N%10                      | 25.7_8 |
| C%11(COC1=CC2=CC=C(Br)C=C2C=C1)=O.CSCC[CH](C%10=O)N%11.O=C(O)[CH](CC1=C(F)C(F)=C(F)C(F)=C1F)N%10            | 25.7_9 |
| C%11(COC1=CC2=CC=C(Br)C=C2C=C1)=O.OC(C=C1)=CC=C1C[CH](C%10=O)N%11.O=C(O)CN%10                               | 25.8_1 |
| C%11(COC1=CC2=CC=C(Br)C=C2C=C1)=O.OC(C=C1)=CC=C1C[CH](C%10=O)N%11.CC(C)[CH](C(O)=O)N%10                     | 25.8_2 |
| C%11(COC1=CC2=CC=C(Br)C=C2C=C1)=O.OC(C=C1)=CC=C1C[CH](C%10=O)N%11.CC(C)C[CH](C(O)=O)N%10                    | 25.8_3 |
| C%11(COC1=CC2=CC=C(Br)C=C2C=C1)=O.OC(C=C1)=CC=C1C[CH](C%10=O)N%11.C[CH](C(O)=O)N%10                         | 25.8_4 |
| C%11(COC1=CC2=CC=C(Br)C=C2C=C1)=O.OC(C=C1)=CC=C1C[CH](C%10=O)N%11.O=C(O)[CH](CC1=CC=CC=C1)N%10              | 25.8_5 |
| C%11(COC1=CC2=CC=C(Br)C=C2C=C1)=O.OC(C=C1)=CC=C1C[CH](C%10=O)N%11.CC[CH](C)[CH](C(O)=O)N%10                 | 25.8_6 |
| C%11(COC1=CC2=CC=C(Br)C=C2C=C1)=O.OC(C=C1)=CC=C1C[CH](C%10=O)N%11.CSCC[CH](C(O)=O)N%10                      | 25.8_7 |
| C%11(COC1=CC2=CC=C(Br)C=C2C=C1)=O.OC(C=C1)=CC=C1C[CH](C%10=O)N%11.OC(C=C1)=CC=C1C[CH](C(O)=O)N%10           | 25.8_8 |
| C%11(COC1=CC2=CC=C(Br)C=C2C=C1)=O.OC(C=C1)=CC=C1C[CH](C%10=O)N%11.O=C(O)[CH](CC1=C(F)C(F)=C(F)C(F)=C1F)N%10 | 25.8_9 |
| C%10(COC1=CC2=CC=C(Br)C=C2C=C1)=O.O=C(O)CN%10                                                               | 25.9_1 |
| C%10(COC1=CC2=CC=C(Br)C=C2C=C1)=O.CC(C)[CH](C(O)=O)N%10                                                     | 25.9_2 |
| C%10(COC1=CC2=CC=C(Br)C=C2C=C1)=O.CC(C)C[CH](C(O)=O)N%10                                                    | 25.9_3 |

|                                                                                          |        |
|------------------------------------------------------------------------------------------|--------|
| <chem>C%10(COC1=CC2=CC=C(Br)C=C2C=C1)=O.C[CH](C(O)=O)N%10</chem>                         | 25.9_4 |
| <chem>C%10(COC1=CC2=CC=C(Br)C=C2C=C1)=O.O=C(O)[CH](CC1=CC=CC=C1)N%10</chem>              | 25.9_5 |
| <chem>C%10(COC1=CC2=CC=C(Br)C=C2C=C1)=O.CC[CH](C)[CH](C(O)=O)N%10</chem>                 | 25.9_6 |
| <chem>C%10(COC1=CC2=CC=C(Br)C=C2C=C1)=O.CSCC[CH](C(O)=O)N%10</chem>                      | 25.9_7 |
| <chem>C%10(COC1=CC2=CC=C(Br)C=C2C=C1)=O.OC(C=C1)=CC=C1C[CH](C(O)=O)N%10</chem>           | 25.9_8 |
| <chem>C%10(COC1=CC2=CC=C(Br)C=C2C=C1)=O.O=C(O)[CH](CC1=C(F)C(F)=C(F)C(F)=C1F)N%10</chem> | 25.9_9 |

## 699 Compound Virtual Library Within Applicability Domain of SVM, RF and NN Models

|                                                                       |
|-----------------------------------------------------------------------|
| <chem>CC(C)CC(NC(=O)COc1cccc2ccccc12)C(=O)NCC(=O)O</chem>             |
| <chem>CC(C)CC(NC(=O)COc1ccc2ccccc2c1Br)C(=O)NCC(=O)O</chem>           |
| <chem>CCC(C)C(NC(=O)C(NC(=O)COc1cccc2ccccc12)C(C)C)C(=O)O</chem>      |
| <chem>CC(C)CC(NC(=O)CNC(=O)COc1cccc2ccccc12)C(=O)O</chem>             |
| <chem>CCC(C)C(NC(=O)C(NC(=O)COc1cccc2ccccc12)C(C)CC)C(=O)O</chem>     |
| <chem>CC(C)CC(NC(=O)COc1cccc2ccccc12)C(=O)O</chem>                    |
| <chem>CCC(C)C(NC(=O)CNC(=O)COc1cccc2ccccc12)C(=O)O</chem>             |
| <chem>CC(C)CC(NC(=O)COc1cccc2cc(Br)ccc12)C(=O)NCC(=O)O</chem>         |
| <chem>CCC(C)C(NC(=O)COc1cccc2ccccc12)C(=O)O</chem>                    |
| <chem>CC(C)CC(NC(=O)CNC(=O)COc1cccc2cc(Br)ccc12)C(=O)O</chem>         |
| <chem>CC(C)CC(NC(=O)COc1ccc2ccccc2c1)C(=O)NCC(=O)O</chem>             |
| <chem>CC(C)CC(NC(=O)CNC(=O)COc1ccc2ccccc2c1)C(=O)O</chem>             |
| <chem>CCC(C)C(NC(=O)C(CC(C)C)NC(=O)COc1cccc2ccccc12)C(=O)O</chem>     |
| <chem>CC(C)CC(NC(=O)C(NC(=O)COc1cccc2ccccc12)C(C)C)C(=O)O</chem>      |
| <chem>CC(C)CC(NC(=O)COc1ccc(Cl)c2ccccc12)C(=O)NCC(=O)O</chem>         |
| <chem>CC(C)CC(NC(=O)COc1cccc2cc(Br)ccc12)C(=O)O</chem>                |
| <chem>CC(C)CC(NC(=O)CNC(=O)COc1ccc(Cl)c2ccccc12)C(=O)O</chem>         |
| <chem>CCC(C)C(NC(=O)COc1cccc2cc(ccc12)C#N)C(=O)O</chem>               |
| <chem>CC(C)CC(NC(=O)CNC(=O)COc1cc(Cl)c2ccccc2c1)C(=O)O</chem>         |
| <chem>CC(C)CC(NC(=O)COc1cc(Cl)c2ccccc2c1)C(=O)NCC(=O)O</chem>         |
| <chem>CC(C)C(NC(=O)C(NC(=O)COc1cccc2ccccc12)C(C)C)C(=O)O</chem>       |
| <chem>CCC(C)C(NC(=O)CNC(=O)COc1ccc2ccccc2c1)C(=O)O</chem>             |
| <chem>CCC(C)C(NC(=O)COc1cccc2ccccc12)C(=O)NC(C(C)C)C(=O)O</chem>      |
| <chem>CC(C)CC(NC(=O)COc1ccc(Cl)c2ccccc12)C(=O)O</chem>                |
| <chem>CCC(C)C(NC(=O)C(NC(=O)COc1ccc2ccccc2c1)C(C)C)C(=O)O</chem>      |
| <chem>CCC(C)C(NC(=O)CNC(=O)COc1cccc2cc(Br)ccc12)C(=O)O</chem>         |
| <chem>CCC(C)C(NC(=O)CNC(=O)COc1cccc2cc(ccc12)C#N)C(=O)O</chem>        |
| <chem>CC(C)CC(NC(=O)COc1cccc2cc(ccc12)C#N)C(=O)O</chem>               |
| <chem>CCC(C)C(NC(=O)C(NC(=O)COc1cccc2cc(ccc12)C#N)C(C)C)C(=O)O</chem> |
| <chem>CC(C)CC(NC(=O)CNC(=O)COc1cccc2cc(ccc12)C#N)C(=O)O</chem>        |
| <chem>CCC(C)C(NC(=O)COc1cccc2cc(Br)ccc12)C(=O)O</chem>                |
| <chem>CCC(C)C(NC(=O)COc1cccc2ccccc12)C(=O)NC(CC(C)C)C(=O)O</chem>     |
| <chem>CC(C)CC(NC(=O)COc1ccc2ccccc2c1)C(=O)O</chem>                    |
| <chem>CCC(C)C(NC(=O)COc1cccc2ccccc12)C(=O)NCC(=O)O</chem>             |
| <chem>CC(C)CC(NC(=O)COc1ccc2CCCCc2c1)C(=O)NCC(=O)O</chem>             |
| <chem>CC(C)CC(NC(=O)COc1cccc2cc(ccc12)C#N)C(=O)NCC(=O)O</chem>        |
| <chem>CCC(C)C(NC(=O)C(NC(=O)COc1ccc(Cl)c2ccccc12)C(C)C)C(=O)O</chem>  |
| <chem>CC(C)CC(NC(=O)COc1cc(Cl)c2ccccc2c1)C(=O)O</chem>                |
| <chem>CCC(C)C(NC(=O)CNC(=O)COc1ccc(Cl)c2ccccc12)C(=O)O</chem>         |
| <chem>CC(C)CC(NC(=O)COc1cccc2ccccc12)C(=O)NC(C(C)C)C(=O)O</chem>      |
| <chem>CCC(C)C(NC(=O)C(NC(=O)COc1cccc2cc(Br)ccc12)C(C)C)C(=O)O</chem>  |

|                                                           |
|-----------------------------------------------------------|
| CCC(C)C(NC(=O)C(NC(=O)COc1ccccc1)C(C)C(=O)O               |
| CCC(C)C(NC(=O)CNC(=O)COc1cc(Cl)c2ccccc2c1)C(=O)O          |
| CCC(C)C(NC(=O)CNC(=O)COc1ccc2CCCCc2c1)C(=O)O              |
| CCC(C)C(NC(=O)COc1ccc(Cl)c2ccccc12)C(=O)O                 |
| CC(C)CC(NC(=O)CNC(=O)COc1ccc2CCCCc2c1)C(=O)O              |
| CCC(C)C(NC(=O)C(NC(=O)COc1cc(Cl)c2ccccc2c1)C(C)C(=O)O     |
| CCC(C)C(NC(=O)COc1ccc2ccccc2c1)C(=O)O                     |
| CC(C)CC(NC(=O)CNC(=O)COc1ccc2cc(Br)ccc2c1)C(=O)O          |
| CCCCCCCCCCCCC(=O)NCC(=O)NC(CC(C)C)C(=O)O                  |
| CCC(C)C(NC(=O)COc1cc(Cl)c2ccccc2c1)C(=O)O                 |
| CCC(C)C(NC(=O)C(NC(=O)COc1cccc2cc(ccc12)C#N)C(C)CC)C(=O)O |
| CC(C)C(NC(=O)COc1cccc2ccccc12)C(=O)NCC(=O)O               |
| CC(C)C(NC(=O)CNC(=O)COc1cccc2ccccc12)C(=O)O               |
| CC(C)C(NC(=O)COc1cccc2ccccc12)C(=O)O                      |
| CCC(C)C(NC(=O)C(NC(=O)COc1ccc(Cl)c2ccccc12)C(C)CC)C(=O)O  |
| CCC(C)C(NC(=O)C(CC(C)C)NC(=O)COc1ccc2ccccc2c1)C(=O)O      |
| CCC(C)C(NC(=O)C(NC(=O)COc1ccc2CCCCc2c1)C(C)C)C(=O)O       |
| CCC(C)C(NC(=O)C(NC(=O)COc1ccccc1)C(C)CC)C(=O)O            |
| CC(C)CC(NC(=O)COc1ccc2cc(Br)ccc2c1)C(=O)NCC(=O)O          |
| CC(C)CC(NC(=O)C(CC(C)C)NC(=O)COc1cccc2ccccc12)C(=O)O      |
| COc1cc2ccccc2cc1OCC(=O)NC(CC(C)C)C(=O)O                   |
| CCC(C)C(NC(=O)C(CC(C)C)NC(=O)COc1ccccc1)C(=O)O            |
| COc1cc2ccccc2cc1OCC(=O)NCC(=O)NC(CC(C)C)C(=O)O            |
| CC(C)CC(NC(=O)C(NC(=O)COc1cccc2cc(Br)ccc12)C(C)C)C(=O)O   |
| CC(C)C(NC(=O)COc1cccc2ccccc12)C(=O)NC(C)C(=O)O            |
| CCC(C)C(NC(=O)C(C)NC(=O)COc1cccc2ccccc12)C(=O)O           |
| CC(C)CC(NC(=O)C(NC(=O)COc1ccc(Cl)c2ccccc12)C(C)C)C(=O)O   |
| CC(C)CC(NC(=O)COc1cccc2ccccc12)C(=O)NC(C)C(=O)O           |
| CCC(C)C(NC(=O)COc1cc2ccccc2cc1OC)C(=O)O                   |
| CCC(C)C(NC(=O)COc1ccc2CCCCc2c1)C(=O)O                     |
| CCC(C)C(NC(=O)COc1cccc2ccccc12)C(=O)NC(C)C(=O)O           |
| CC(C)CC(NC(=O)COc1ccc2CCCCc2c1)C(=O)O                     |
| COc1ccc2ccc(OCC(=O)NCC(=O)NC(CC(C)C)C(=O)O)cc2c1          |
| CCC(C)C(NC(=O)C(CC(C)C)NC(=O)COc1cccc2cc(ccc12)C#N)C(=O)O |
| CCC(C)C(NC(=O)C(CC(C)C)NC(=O)COc1ccc(Cl)c2ccccc12)C(=O)O  |
| COc1cc2ccccc2cc1OCC(=O)NC(CC(C)C)C(=O)NCC(=O)O            |
| CCC(C)C(NC(=O)C(NC(=O)COc1cc(Cl)c2ccccc2c1)C(C)CC)C(=O)O  |
| CC(C)C(NC(=O)COc1ccc2CCCCc2c1)C(=O)NCC(=O)O               |
| CCCCCCCCCCCCC(=O)NCC(=O)O                                 |
| CC(C)CC(NC(=O)CNC(=O)COc1ccc2cc(ccc2c1)C#N)C(=O)O         |
| CCC(C)C(NC(=O)C(NC(=O)COc1ccc2ccccc2c1)C(C)CC)C(=O)O      |
| CC(C)C(NC(=O)COc1cccc2cc(ccc12)C#N)C(=O)O                 |
| COc1ccc2ccc(OCC(=O)NC(CC(C)C)C(=O)O)cc2c1                 |
| COc1ccc2ccc(OCC(=O)NC(CC(C)C)C(=O)NCC(=O)O)cc2c1          |

|                                                          |
|----------------------------------------------------------|
| CC(C)CC(NC(=O)C(NC(=O)COc1ccccc1)C(C)C)C(=O)O            |
| CCC(C)C(NC(=O)CNC(=O)COc1cccc2CCCCc12)C(=O)O             |
| CC(C)CC(NC(=O)C(NC(=O)COc1cccc2cc(ccc12)C#N)C(C)C)C(=O)O |
| CCCCCCCCCCCCC(=O)NCC(=O)NC(C(C)CC)C(=O)O                 |
| CCC(C)C(NC(=O)CNC(=O)COc1cc2ccccc2cc1OC)C(=O)O           |
| CCCCCCCCCCCCC(=O)NC(CC(C)C)C(=O)NCC(=O)O                 |
| CC(C)CC(NC(=O)C(C)NC(=O)COc1cccc2cccc12)C(=O)O           |
| CCC(C)C(NC(=O)C(NC(=O)COc1cccc2cc(Br)ccc12)C(C)CC)C(=O)O |
| COc1ccc2cc(OCC(=O)NCC(=O)NC(CC(C)C)C(=O)O)ccc2c1         |
| CCC(C)C(NC(=O)C(CC(C)C)NC(=O)COc1cc(Cl)c2ccccc2c1)C(=O)O |
| CCC(C)C(NC(=O)C(NC(=O)COc1ccc2CCCCc2c1)C(C)CC)C(=O)O     |
| CC(C)C(NC(=O)C(NC(=O)COc1cccc2cc(ccc12)C#N)C(C)C)C(=O)O  |
| CCC(C)C(NC(=O)C(CC(C)C)NC(=O)COc1cccc2cc(Br)ccc12)C(=O)O |
| CCC(C)C(NC(=O)C(NC(=O)COc1cc2ccccc2cc1OC)C(C)C)C(=O)O    |
| CC(C)C(NC(=O)C(NC(=O)COc1ccc2ccccc2c1)C(C)C)C(=O)O       |
| CCCCCCCCCCCCC(=O)NCC(=O)NC(CC(C)C)C(=O)O                 |
| CC(C)CC(NC(=O)COc1cccc2CCCCc12)C(=O)NCC(=O)O             |
| CC(C)CC(NC(=O)COc1ccc2cc(ccc2c1)C#N)C(=O)NCC(=O)O        |
| CCCCCCCCCCCCC(=O)NCC(=O)O                                |
| CC(C)CC(NC(=O)COc1ccc2cc(Br)ccc2c1)C(=O)O                |
| COc1ccc2cc(OCC(=O)NC(CC(C)C)C(=O)O)ccc2c1                |
| CC(C)CC(NC(=O)C(NC(=O)COc1cc(Cl)c2ccccc2c1)C(C)C)C(=O)O  |
| COc1ccc2cc(OCC(=O)NC(CC(C)C)C(=O)NCC(=O)O)ccc2c1         |
| CC(C)C(NC(=O)C(NC(=O)COc1cccc2cc(Br)ccc12)C(C)C)C(=O)O   |
| CC(C)CC(NC(=O)CNC(=O)COc1cccc2CCCCc12)C(=O)O             |
| CC(C)C(NC(=O)CNC(=O)COc1cccc2cc(Br)ccc12)C(=O)O          |
| CCC(C)C(NC(=O)COc1cccc2cc(ccc12)C#N)C(=O)NC(C(C)C)C(=O)O |
| CCCCCCCCCCCCC(=O)NCC(=O)NCC(=O)O                         |
| CCC(C)C(NC(=O)CNC(=O)COc1ccc2ccc(OC)cc2c1)C(=O)O         |
| CC(C)CC(NC(=O)C(NC(=O)COc1ccc2ccccc2c1)C(C)C)C(=O)O      |
| CCC(C)C(NC(=O)C(NC(=O)COc1cccc2CCCCc12)C(C)C)C(=O)O      |
| CCC(C)C(NC(=O)COc1ccc(Cl)c2ccccc12)C(=O)NCC(=O)O         |
| CCC(C)C(NC(=O)C(CC(C)C)NC(=O)COc1ccc2CCCCc2c1)C(=O)O     |
| CC(C)C(NC(=O)CNC(=O)COc1ccc2ccccc2c1)C(=O)O              |
| CCC(C)C(NC(=O)COc1cccc2CCCCc12)C(=O)O                    |
| CCC(C)C(NC(=O)COc1cccc2cc(ccc12)C#N)C(=O)NCC(=O)O        |
| CCCCCCCCCCCCC(=O)NCC(=O)NC(C(C)CC)C(=O)O                 |
| CC(C)C(NC(=O)COc1cccc2cc(Br)ccc12)C(=O)NCC(=O)O          |
| CC(C)C(NC(=O)COc1ccc(Cl)c2ccccc12)C(=O)NCC(=O)O          |
| CC(C)C(NC(=O)C(NC(=O)COc1ccc(Cl)c2ccccc12)C(C)C)C(=O)O   |
| CC(C)C(NC(=O)COc1cccc2cc(Br)ccc12)C(=O)O                 |
| CC(C)CC(NC(=O)COc1ccc2cc(ccc2c1)C#N)C(=O)O               |
| CCC(C)C(NC(=O)COc1ccc2ccc(OC)cc2c1)C(=O)O                |
| CC(C)CC(NC(=O)COc1cccc2cc(Br)ccc12)C(=O)NC(C(C)C)C(=O)O  |

|                                                          |
|----------------------------------------------------------|
| CC(C)C(NC(=O)C(NC(=O)COc1cc(Cl)c2ccccc2c1)C(C)C)C(=O)O   |
| CC(C)CC(NC(=O)COc1cccc2cc(ccc12)C#N)C(=O)NC(C(C)C)C(=O)O |
| CCC(C)C(NC(=O)COc1ccc(Cl)c2ccccc12)C(=O)NC(C(C)C)C(=O)O  |
| CC(C)C(NC(=O)COc1cccc2CCCCc12)C(=O)NCC(=O)O              |
| CCCCCCCCCCCCCCCC(=O)NCC(=O)NCC(=O)O                      |
| CCC(C)C(NC(=O)COc1cccc2cc(Br)ccc12)C(=O)NCC(=O)O         |
| CC(C)CC(NC(=O)COc1ccc2ccccc2c1)C(=O)NC(C(C)C)C(=O)O      |
| CC(C)C(NC(=O)C(NC(=O)COc1ccc2CCCCc2c1)C(C)C)C(=O)O       |
| CCC(C)C(NC(=O)C(NC(=O)COc1cc2ccccc2cc1OC)C(C)CC)C(=O)O   |
| CC(C)CC(NC(=O)CNC(=O)Cn1c2ccccc2c3ccccc13)C(=O)O         |
| CCCCCCCCCCCCCCCC(=O)NC(C(C)C)C(=O)NCC(=O)O               |
| CC(C)C(NC(=O)CNC(=O)COc1ccc2CCCCc2c1)C(=O)O              |
| CC(C)CC(NC(=O)COc1ccc(Cl)c2ccccc12)C(=O)NC(C(C)C)C(=O)O  |
| CC(C)CC(NC(=O)C(NC(=O)COc1ccc2CCCCc2c1)C(C)C)C(=O)O      |
| CCC(C)C(NC(=O)C(C(C)C)NC(=O)COc1cc2ccccc2cc1OC)C(=O)O    |
| CC(C)C(NC(=O)CNC(=O)COc1cc(Cl)c2ccccc2c1)C(=O)O          |
| CCC(C)C(NC(=O)C(NC(=O)COc1ccc2ccc(OC)cc2c1)C(C)C)C(=O)O  |
| CC(C)C(NC(=O)C(NC(=O)COc1cccc1)C(C)C)C(=O)O              |
| CC(C)C(NC(=O)COc1cc(Cl)c2ccccc2c1)C(=O)NCC(=O)O          |
| CCC(C)C(NC(=O)COc1cccc2cc(Br)ccc12)C(=O)NC(C(C)C)C(=O)O  |
| CCC(C)C(NC(=O)COc1ccc(Cl)c2ccccc12)C(=O)NC(C(C)C)C(=O)O  |
| CC(C)CC(NC(=O)COc1cccc2CCCCc12)C(=O)O                    |
| CCCCCCCCCCCCCCCC(=O)NCC(=O)NC(C(C)C)C(=O)O               |
| CCC(C)C(NC(=O)CNC(=O)COc1ccc2cc(ccc2c1)C#N)C(=O)O        |
| CC(C)C(NC(=O)COc1ccc2ccccc2c1)C(=O)NCC(=O)O              |
| CC(C)C(NC(=O)CNC(=O)COc1ccc(Cl)c2ccccc12)C(=O)O          |
| COc1cc2ccccc2cc1OCC(=O)NC(C(C)C)C(=O)NC(C(C)C)C(=O)O     |
| CC(C)CC(NC(=O)COc1cccc1)C(=O)NC(C(C)C)C(=O)O             |
| CCC(C)C(NC(=O)C(NC(=O)COc1cccc2CCCCc12)C(C)CC)C(=O)O     |
| CCC(C)C(NC(=O)COc1cccc1)C(=O)NC(C(C)C)C(=O)O             |
| CCCCCCCCCCCCCCCC(=O)NC(C(C)C)C(=O)NCC(=O)O               |
| CCC(C)C(NC(=O)COc1cc(Cl)c2ccccc2c1)C(=O)NCC(=O)O         |
| CCC(C)C(NC(=O)COc1cccc2cc(ccc12)C#N)C(=O)NC(C(C)C)C(=O)O |
| CC(C)C(NC(=O)CNC(=O)COc1cccc2CCCCc12)C(=O)O              |
| CCC(C)C(NC(=O)C(C)NC(=O)COc1cccc2cc(ccc12)C#N)C(=O)O     |
| CC(C)CC(NC(=O)COc1cc(Cl)c2ccccc2c1)C(=O)NC(C(C)C)C(=O)O  |
| CC(C)CC(NC(=O)COc1cccc2cc(Br)ccc12)C(=O)NC(C)C(=O)O      |
| CC(C)C(NC(=O)COc1ccc2ccccc2c1)C(=O)O                     |
| CCC(C)C(NC(=O)CNC(=O)COc1ccc2cc(OC)ccc2c1)C(=O)O         |
| CC(C)C(NC(=O)COc1cccc2cc(ccc12)C#N)C(=O)NC(C)C(=O)O      |
| CCC(C)C(NC(=O)COc1ccc2CCCCc2c1)C(=O)NCC(=O)O             |
| CCC(C)C(NC(=O)CNC(=O)COc1ccc2cc(Br)ccc2c1)C(=O)O         |
| CCC(C)C(NC(=O)COc1cccc1)C(=O)NC(C(C)C)C(=O)O             |
| CCC(C)C(NC(=O)COc1cc(Cl)c2ccccc2c1)C(=O)NC(C(C)C)C(=O)O  |



|                                                           |
|-----------------------------------------------------------|
| CC(C)C(NC(=O)C(NC(=O)COc1cccc2CCCCc12)C(C)C)C(=O)O        |
| CC(C)C(NC(=O)COc1ccc(Cl)c2cccc12)C(=O)O                   |
| CC(C)CC(NC(=O)C(CC(C)C)NC(=O)COc1cccc1)C(=O)O             |
| CC(C)C(NC(=O)COc1cc(Cl)c2cccc2c1)C(=O)O                   |
| CCC(C)C(NC(=O)C(CC(C)C)NC(=O)COc1ccc2ccc(OC)cc2c1)C(=O)O  |
| CC(C)CC(NC(=O)C(CC(C)C)NC(=O)COc1cccc2cc(Br)ccc12)C(=O)O  |
| CCC(C)C(NC(=O)C(C)NC(=O)COc1cccc2cc(Br)ccc12)C(=O)O       |
| CC(C)CC(NC(=O)COc1ccc(Cl)c2cccc12)C(=O)NC(C)C(=O)O        |
| CCC(C)C(NC(=O)COc1ccc2cc(OC)ccc2c1)C(=O)O                 |
| CC(NC(=O)COc1cccc2cccc12)C(=O)O                           |
| CC(C)CC(NC(=O)COc1cccc2cc(ccc12)C#N)C(=O)NC(C)C(=O)O      |
| CCC(C)C(NC(=O)COc1cccc2cc(Br)ccc12)C(=O)NC(CC(C)C)C(=O)O  |
| CC(C)C(NC(=O)COc1ccc2CCCCc2c1)C(=O)O                      |
| CC(C)C(NC(=O)COc1cccc2cc(Br)ccc12)C(=O)NC(C)C(=O)O        |
| COc1cc2cccc2cc1OCC(=O)NCC(=O)NC(C(C)C)C(=O)O              |
| CCCCCCCCCCCCC(=O)NC(C(C)C)C(=O)NC(C(C)CC)C(=O)O           |
| CC(C)CC(NC(=O)C(CC(C)C)NC(=O)COc1cccc2cc(ccc12)C#N)C(=O)O |
| CC(C)CC(NC(=O)C(CC(C)C)NC(=O)COc1ccc(Cl)c2cccc12)C(=O)O   |
| CCC(C)C(NC(=O)COc1ccc2cc(ccc2c1)C#N)C(=O)O                |
| CCCCCCCCCCCCCCCC(=O)NCC(=O)NC(C(C)C)C(=O)O                |
| CCC(C)C(NC(=O)C(C)NC(=O)COc1ccc(Cl)c2cccc12)C(=O)O        |
| CC(C)CC(NC(=O)COc1ccc2cccc2c1)C(=O)NC(C)C(=O)O            |
| CC(C)CC(NC(=O)C(C)NC(=O)COc1cccc2cc(Br)ccc12)C(=O)O       |
| CCC(C)C(NC(=O)COc1cccc2CCCCc12)C(=O)NCC(=O)O              |
| CCC(C)C(NC(=O)COc1cc(Cl)c2cccc2c1)C(=O)NC(CC(C)C)C(=O)O   |
| COc1cc2cccc2cc1OCC(=O)NC(C(C)C)C(=O)NC(C(C)C)C(=O)O       |
| CC(C)CC(NC(=O)C(CC(C)C)NC(=O)COc1ccc2cccc2c1)C(=O)O       |
| CCC(C)C(NC(=O)COc1cccc2cc(ccc12)C#N)C(=O)NC(C)C(=O)O      |
| CCC(C)C(NC(=O)C(NC(=O)COc1ccc2cc(OC)ccc2c1)C(C)C)C(=O)O   |
| CCC(C)C(NC(=O)CNC(=O)Cn1c2cccc2c3cccc13)C(=O)O            |
| CC(C)C(NC(=O)C(C)NC(=O)COc1cccc2cccc12)C(=O)O             |
| CC(C)CC(NC(=O)COc1cccc1)C(=O)NC(C)C(=O)O                  |
| CC(C)C(NC(=O)COc1cccc2CCCCc12)C(=O)O                      |
| COc1cc2cccc2cc1OCC(=O)NC(C(C)C)C(=O)O                     |
| CCC(C)C(NC(=O)C(CC(C)C)NC(=O)COc1cccc2CCCCc12)C(=O)O      |
| COc1cc2cccc2cc1OCC(=O)NC(C(C)C)C(=O)NCC(=O)O              |
| CCCCCCCCCCCCCCCC(=O)NC(C(C)C)C(=O)NCC(=O)O                |
| CC(C)CC(NC(=O)C(NC(=O)COc1cccc2CCCCc12)C(C)C)C(=O)O       |
| OC(=O)CNC(=O)COc1cccc2cc(Br)ccc12                         |
| CCC(C)C(NC(=O)COc1ccc2cccc2c1)C(=O)NC(C(C)C)C(=O)O        |
| CC(C)C(NC(=O)COc1ccc2CCCCc2c1)C(=O)NC(C)C(=O)O            |
| CCC(C)C(NC(=O)C(NC(=O)COc1ccc2cc(ccc2c1)C#N)C(C)C)C(=O)O  |
| COc1cc2cccc2cc1OCC(=O)NC(CC(C)C)C(=O)NC(C(C)C)C(=O)O      |
| CC(C)C(NC(=O)COc1ccc(Cl)c2cccc12)C(=O)NC(C)C(=O)O         |

|                                                             |
|-------------------------------------------------------------|
| CC(C)CC(NC(=O)C(C)NC(=O)COc1cccc2cc(ccc12)C#N)C(=O)O        |
| CC(C)CC(NC(=O)COc1cc(Cl)c2cccc2c1)C(=O)NC(C)C(=O)O          |
| CC(C)CC(NC(=O)COc1ccc2CCCCc2c1)C(=O)NC(C(C)C)C(=O)O         |
| CCCCCCCCCCCCCCCC(=O)NC(C(C)C)C(=O)NC(C(C)CC)C(=O)O          |
| CC(C)C(NC(=O)COc1ccc2cccc2c1)C(=O)NC(C)C(=O)O               |
| CCC(C)C(NC(=O)COc1ccc(Cl)c2cccc12)C(=O)NC(C)C(=O)O          |
| CCC(C)C(NC(=O)COc1cccc2cc(Br)ccc12)C(=O)NC(C)C(=O)O         |
| CCC(C)C(NC(=O)C(CC(C)C)NC(=O)COc1ccc2cc(OC)ccc2c1)C(=O)O    |
| COc1ccc2ccc(OCC(=O)NC(C(C)C)C(=O)NC(CC(C)C)C(=O)O)cc2c1     |
| CC(C)CC(NC(=O)C(C)NC(=O)COc1ccc(Cl)c2cccc12)C(=O)O          |
| CC(C)CC(NC(=O)C(CC(C)C)NC(=O)COc1cc(Cl)c2cccc2c1)C(=O)O     |
| CCC(C)C(NC(=O)C(C)NC(=O)COc1cc(Cl)c2cccc2c1)C(=O)O          |
| CC(C)C(NC(=O)COc1cc(Cl)c2cccc2c1)C(=O)NC(C)C(=O)O           |
| CCC(C)C(NC(=O)COc1ccc2cccc2c1)C(=O)NCC(=O)O                 |
| CCC(C)C(NC(=O)C(NC(=O)COc1ccc2ccc(OC)cc2c1)C(C)CC)C(=O)O    |
| CCC(C)C(NC(=O)COc1cc2cccc2cc1OC)C(=O)NC(C(C)C)C(=O)O        |
| CCC(C)C(NC(=O)COc1ccc2CCCCc2c1)C(=O)NC(C(C)C)C(=O)O         |
| CCCCCCCCCCCCCCCC(=O)NC(CC(C)C)C(=O)NC(C(C)CC)C(=O)O         |
| CCC(C)C(NC(=O)COc1cc2cccc2cc1OC)C(=O)NCC(=O)O               |
| CCC(C)C(NC(=O)COc1ccc2cc(Br)ccc2c1)C(=O)O                   |
| CCCCCCCCCCCCCCCC(=O)NC(C(C)CC)C(=O)NC(C(C)CC)C(=O)O         |
| OC(=O)C(Cc1c(F)c(F)c(F)c(F)c1F)NC(=O)CNC(=O)COc2cccc3cccc23 |
| CCCCCCCCCCCCCCCC(=O)NC(C(C)C)C(=O)NC(CC(C)C)C(=O)O          |
| CCC(C)C(NC(=O)C(CC(C)C)NC(=O)COc1ccc2cc(ccc2c1)C#N)C(=O)O   |
| OC(=O)C(Cc1cccc1)NC(=O)CNC(=O)COc2cccc3cccc23               |
| CCC(C)C(NC(=O)COc1cccc2CCCCc12)C(=O)NC(C(C)C)C(=O)O         |
| CCC(C)C(NC(=O)C(C)NC(=O)COc1cccc1)C(=O)O                    |
| CC(C)C(NC(=O)COc1cccc2CCCCc12)C(=O)NC(C)C(=O)O              |
| OC(=O)CNC(=O)COc1cc(Cl)c2cccc2c1                            |
| CCCCCCCCCCCCCCCC(=O)NC(C(C)CC)C(=O)NCC(=O)O                 |
| OC(=O)C(Cc1cccc1)NC(=O)CNC(=O)COc2ccc3cccc3c2               |
| OC(=O)CNC(=O)COc1ccc(Cl)c2cccc12                            |
| CCC(C)C(NC(=O)COc1cc2cccc2cc1OC)C(=O)NC(CC(C)C)C(=O)O       |
| CC(C)C(NC(=O)COc1cccc2cccc12)C(=O)NC(Cc3cccc3)C(=O)O        |
| CCCCCCCCCCCCCCCC(=O)NC(C(C)C)C(=O)NC(C(C)C)C(=O)O           |
| CCCCCCCCCCCCCCCC(=O)NC(CC(C)C)C(=O)NC(C(C)CC)C(=O)O         |
| OC(=O)C(Cc1c(F)c(F)c(F)c(F)c1F)NC(=O)CNC(=O)COc2ccc3cccc3c2 |
| CCC(C)C(NC(=O)COc1ccc2CCCCc2c1)C(=O)NC(CC(C)C)C(=O)O        |
| CCCCCCCCCCCCCCCC(=O)NC(C(C)CC)C(=O)NC(C(C)CC)C(=O)O         |
| CCC(C)C(NC(=O)COc1cc(Cl)c2cccc2c1)C(=O)NC(C)C(=O)O          |
| CCCCCCCCCCCCCCCC(=O)NCC(=O)NC(C)C(=O)O                      |
| CC(C)CC(NC(=O)C(C)NC(=O)COc1cc(Cl)c2cccc2c1)C(=O)O          |
| COc1cc2cccc2cc1OCC(=O)NC(CC(C)C)C(=O)NC(CC(C)C)C(=O)O       |
| CC(C)CC(NC(=O)C(C)NC(=O)COc1cccc1)C(=O)O                    |

|                                                                     |
|---------------------------------------------------------------------|
| CCCCCCCCCCCCCCCC(=O)NC(C(C)C)C(=O)NC(CC(C)C)C(=O)O                  |
| COc1cc2ccccc2cc1OCC(=O)NC(C(C)C)C(=O)NC(C)C(=O)O                    |
| CCC(C)C(NC(=O)C(C)NC(=O)COc1ccc2ccccc2c1)C(=O)O                     |
| CCC(C)C(NC(=O)COc1ccccc1)C(=O)NC(C)C(=O)O                           |
| CC(NC(=O)COc1cccc2cc(ccc12)C#N)C(=O)O                               |
| CCC(C)C(NC(=O)C(NC(=O)COc1ccc2cc(Br)ccc2c1)C(C)C)C(=O)O             |
| COc1ccc2cc(OCC(=O)NC(C(C)C)C(=O)NC(CC(C)C)C(=O)O)ccc2c1             |
| CC(NC(=O)CNC(=O)COc1cccc2cc(Br)ccc12)C(=O)O                         |
| CC(C)CC(NC(=O)COc1cccc2CCCCc12)C(=O)NC(C(C)C)C(=O)O                 |
| CC(C)CC(NC(=O)COc1ccc2CCCCc2c1)C(=O)NC(C)C(=O)O                     |
| CCC(C)C(NC(=O)C(CC(C)C)NC(=O)COc1ccc2cc(Br)ccc2c1)C(=O)O            |
| CCCCCCCCCCCCCCCC(=O)NC(C(C)C)C(=O)NC(C(C)C)C(=O)O                   |
| COc1ccc2ccc(OCC(=O)NCC(=O)NC(C(C)C)C(=O)O)cc2c1                     |
| CCC(C)C(NC(=O)C(C)NC(=O)COc1cccc2CCCCc12)C(=O)O                     |
| COc1cc2ccccc2cc1OCC(=O)NC(CC(C)C)C(=O)NC(C)C(=O)O                   |
| CC(C)CC(NC(=O)C(CC(C)C)NC(=O)COc1ccc2CCCCc2c1)C(=O)O                |
| COc1ccc2ccc(OCC(=O)NC(CC(C)C)C(=O)NC(C(C)C)C(=O)O)cc2c1             |
| CCC(C)C(NC(=O)COc1ccc2ccccc2c1)C(=O)NC(CC(C)C)C(=O)O                |
| CC(C)C(NC(=O)COc1cccc2ccccc12)C(=O)NC(Cc3c(F)c(F)c(F)c(F)c3F)C(=O)O |
| CCC(C)C(NC(=O)C(Cc1ccccc1)NC(=O)COc2cccc3ccccc23)C(=O)O             |
| CCCCCCCCCCCCCCCC(=O)NC(C(C)CC)C(=O)NCC(=O)O                         |
| CCCCCCCCCCCCCCCC(=O)NC(C(C)C)C(=O)NC(C)C(=O)O                       |
| CC(C)CC(NC(=O)Cn1c2ccccc2c3ccccc13)C(=O)NCC(=O)O                    |
| CCC(C)C(NC(=O)C(C)NC(=O)COc1cc2ccccc2cc1OC)C(=O)O                   |
| OC(=O)C(Cc1ccccc1)NC(=O)CNC(=O)COc2cccc3cc(ccc23)C#N                |
| COc1ccc2ccc(OCC(=O)NC(C(C)C)C(=O)NCC(=O)O)cc2c1                     |
| OC(=O)C(Cc1c(F)c(F)c(F)c(F)c1F)NC(=O)CNC(=O)COc2ccccc2              |
| CCCCCCCCCCCCCCCC(=O)NCC(=O)NC(C)C(=O)O                              |
| OC(=O)C(Cc1c(F)c(F)c(F)c(F)c1F)NC(=O)CNC(=O)COc2cccc3cc(ccc23)C#N   |
| CCC(C)C(NC(=O)C(C)NC(=O)COc1ccc2CCCCc2c1)C(=O)O                     |
| CCC(C)C(NC(=O)C(NC(=O)COc1ccc2cc(OC)ccc2c1)C(C)CC)C(=O)O            |
| COc1ccc2ccc(OCC(=O)NC(C(C)C)C(=O)NC(C(C)C)C(=O)O)cc2c1              |
| CCCCCCCCCCCCCCCC(=O)NC(CC(C)C)C(=O)NC(C(C)C)C(=O)O                  |
| CCC(C)C(NC(=O)COc1cccc2CCCCc12)C(=O)NC(CC(C)C)C(=O)O                |
| CC(C)CC(NC(=O)C(NC(=O)COc1ccc2cc(ccc2c1)C#N)C(C)C)C(=O)O            |
| CC(C)CC(NC(=O)C(NC(=O)COc1ccc2cc(Br)ccc2c1)C(C)C)C(=O)O             |
| OC(=O)C(Cc1c(F)c(F)c(F)c(F)c1F)NC(=O)CNC(=O)COc2ccc3CCCCc3c2        |
| CCCCCCCCCCCCCCCC(=O)NC(C(C)CC)C(=O)NC(CC(C)C)C(=O)O                 |
| CC(C)CC(NC(=O)C(C)NC(=O)COc1ccc2ccccc2c1)C(=O)O                     |
| OC(=O)C(Cc1ccccc1)NC(=O)CNC(=O)COc2cccc3cc(Br)ccc23                 |
| CCC(C)C(NC(=O)C(NC(=O)COc1ccc2cc(ccc2c1)C#N)C(C)CC)C(=O)O           |
| COc1ccc2ccc(OCC(=O)NC(CC(C)C)C(=O)NC(CC(C)C)C(=O)O)cc2c1            |
| CCCCCCCCCCCCCCCC(=O)NC(C(C)C)C(=O)NC(C)C(=O)O                       |
| CCC(C)C(NC(=O)COc1cccc2ccccc12)C(=O)NC(Cc3ccccc3)C(=O)O             |

|                                                                     |
|---------------------------------------------------------------------|
| CCCCCCCCCCCCC(=O)NC(CC(C)C)C(=O)NC(C)C(=O)O                         |
| CCCCCCCCCCCCCCCC(=O)NC(CC(C)C)C(=O)NC(C(C)C)C(=O)O                  |
| CCCCCCCCCCCCCCCC(=O)NC(CC(C)C)C(=O)NC(CC(C)C)C(=O)O                 |
| CCC(C)C(NC(=O)COc1ccc2CCCCc2c1)C(=O)NC(C)C(=O)O                     |
| OC(=O)C(Cc1cccc1)NC(=O)CNC(=O)COc2ccc3CCCCc3c2                      |
| CC(C)C(NC(=O)C(C)NC(=O)COc1cccc2cc(ccc12)C#N)C(=O)O                 |
| CC(C)CC(NC(=O)COc1cccc2cccc12)C(=O)NC(Cc3cccc3)C(=O)O               |
| CCC(C)C(NC(=O)COc1cc2cccc2cc1OC)C(=O)NC(C)C(=O)O                    |
| COc1ccc2ccc(OCC(=O)NC(C(C)C)C(=O)O)cc2c1                            |
| COc1cc2cccc2cc1OCC(=O)NC(C)C(=O)NC(CC(C)C)C(=O)O                    |
| CC(NC(=O)COc1cccc2cc(Br)ccc12)C(=O)O                                |
| CC(C)CC(NC(=O)COc1cccc2CCCCc12)C(=O)NC(C)C(=O)O                     |
| CCCCCCCCCCCCCCCC(=O)NC(C(C)CC)C(=O)NC(C(C)C)C(=O)O                  |
| OC(=O)C(Cc1c(F)c(F)c(F)c(F)c1F)NC(=O)CNC(=O)COc2cccc3cc(Br)ccc23    |
| CC(C)CC(NC(=O)COc1cccc2cccc12)C(=O)NC(Cc3c(F)c(F)c(F)c(F)c3F)C(=O)O |
| COc1ccc2cc(OCC(=O)NCC(=O)NC(C(C)C)C(=O)O)ccc2c1                     |
| CCC(C)C(NC(=O)COc1ccc2cccc2c1)C(=O)NC(C)C(=O)O                      |
| CCC(C)C(NC(=O)COc1cccc2CCCCc12)C(=O)NC(C)C(=O)O                     |
| CCCCCCCCCCCCCCCC(=O)NC(C(C)CC)C(=O)NC(CC(C)C)C(=O)O                 |
| CC(C)C(NC(=O)COc1cccc1)C(=O)NC(Cc2c(F)c(F)c(F)c(F)c2F)C(=O)O        |
| COc1ccc2cc(OCC(=O)NC(CC(C)C)C(=O)NC(C(C)C)C(=O)O)ccc2c1             |
| CCC(C)C(NC(=O)COc1ccc2ccc(OC)cc2c1)C(=O)NCC(=O)O                    |
| COc1ccc2ccc(OCC(=O)NC(CC(C)C)C(=O)NC(C)C(=O)O)cc2c1                 |
| CC(C)CC(NC(=O)Cn1c2cccc2c3cccc13)C(=O)O                             |
| CC(C)CC(NC(=O)C(C)NC(=O)COc1ccc2CCCCc2c1)C(=O)O                     |
| CC(C)CC(NC(=O)C(C)NC(=O)COc1cccc2CCCCc12)C(=O)O                     |
| CCCCCCCCCCCCCCCC(=O)NCC(=O)NC(Cc1c(F)c(F)c(F)c(F)c1F)C(=O)O         |
| CCCCCCCCCCCCCCCC(=O)NC(CC(C)C)C(=O)NC(CC(C)C)C(=O)O                 |
| OC(=O)C(Cc1cccc1)NC(=O)CNC(=O)COc2cc(Cl)c3cccc3c2                   |
| CCCCCCCCCCCCCCCC(=O)NC(CC(C)C)C(=O)NC(C)C(=O)O                      |
| CCC(C)C(NC(=O)COc1cccc2cccc12)C(=O)NC(Cc3c(F)c(F)c(F)c(F)c3F)C(=O)O |
| CCCCCCCCCCCCCCCC(=O)NC(C(C)CC)C(=O)NC(C(C)C)C(=O)O                  |
| CCC(C)C(NC(=O)COc1ccc2ccc(OC)cc2c1)C(=O)NC(CC(C)C)C(=O)O            |
| COc1ccc2cc(OCC(=O)NC(C(C)C)C(=O)NCC(=O)O)ccc2c1                     |
| OC(=O)C(Cc1cccc1)NC(=O)CNC(=O)COc2ccc(Cl)c3cccc3c2                  |
| COc1cc2cccc2cc1OCC(=O)NCC(=O)NC(Cc3c(F)c(F)c(F)c(F)c3F)C(=O)O       |
| CCC(C)C(NC(=O)C(Cc1cccc1)NC(=O)COc2cccc2)C(=O)O                     |
| CC(C)C(NC(=O)COc1cccc1)C(=O)NC(Cc2cccc2)C(=O)O                      |
| CCC(C)C(NC(=O)COc1ccc2ccc(OC)cc2c1)C(=O)NC(C(C)C)C(=O)O             |
| CCCCCCCCCCCCCCCC(=O)NC(C)C(=O)NC(C(C)CC)C(=O)O                      |
| COc1ccc2cc(OCC(=O)NC(CC(C)C)C(=O)NC(CC(C)C)C(=O)O)ccc2c1            |
| CC(C)CC(NC(=O)COc1cccc1)C(=O)NC(Cc2c(F)c(F)c(F)c(F)c2F)C(=O)O       |
| COc1cc2cccc2cc1OCC(=O)NCC(=O)NC(Cc3cccc3)C(=O)O                     |
| OC(=O)C(Cc1c(F)c(F)c(F)c(F)c1F)NC(=O)CNC(=O)COc2cc(Cl)c3cccc3c2     |

|                                                                          |
|--------------------------------------------------------------------------|
| CC(C)CC(NC(=O)C(CC(C)C)NC(=O)COc1cccc2CCCCc12)C(=O)O                     |
| CC(C)C(NC(=O)COc1cccc2cc(ccc12)C#N)C(=O)NC(Cc3cccc3)C(=O)O               |
| CC(C)CC(NC(=O)COc1ccc2cc(ccc2c1)C#N)C(=O)NC(C(C)C)C(=O)O                 |
| OC(=O)C(Cc1c(F)c(F)c(F)c(F)c1F)NC(=O)CNC(=O)COc2ccc(Cl)c3cccc23          |
| CCCCCCCCCCCCC(=O)NC(C)C(=O)NC(CC(C)C)C(=O)O                              |
| CCC(C)C(NC(=O)C(Cc1cccc1)NC(=O)COc2cccc3cc(ccc23)C#N)C(=O)O              |
| CCCCCCCCCCCCCCCC(=O)NCC(=O)NC(Cc1c(F)c(F)c(F)c(F)c1F)C(=O)O              |
| CC(C)C(NC(=O)COc1cccc2cc(ccc12)C#N)C(=O)NC(Cc3c(F)c(F)c(F)c(F)c3F)C(=O)O |
| COc1ccc2ccc(OCC(=O)NC(C(C)C)C(=O)NC(C)C(=O)O)cc2c1                       |
| CCCCCCCCCCCCC(=O)NC(C(C)CC)C(=O)NC(C)C(=O)O                              |
| COc1ccc2cc(OCC(=O)NC(C(C)C)C(=O)NC(C(C)C)C(=O)O)ccc2c1                   |
| CC(C)C(NC(=O)CNC(=O)COc1ccc2cc(Br)ccc2c1)C(=O)O                          |
| CC(NC(=O)COc1ccc(Cl)c2cccc12)C(=O)O                                      |
| CC(C)C(NC(=O)C(NC(=O)COc1ccc2cc(ccc2c1)C#N)C(C)C)C(=O)O                  |
| CC(C)C(NC(=O)C(C)NC(=O)COc1cccc2cc(Br)ccc12)C(=O)O                       |
| CCC(C)C(NC(=O)C(NC(=O)COc1ccc2cc(Br)ccc2c1)C(C)CC)C(=O)O                 |
| OC(=O)C(Cc1cccc1)NC(=O)CNC(=O)COc2cccc3CCCCc23                           |
| OC(=O)CNC(=O)COc1ccc2cc(Br)ccc2c1                                        |
| OC(=O)C(Cc1c(F)c(F)c(F)c(F)c1F)NC(=O)CNC(=O)COc2cccc3CCCCc23             |
| CC(C)CC(NC(=O)COc1ccc2cc(Br)ccc2c1)C(=O)NC(C(C)C)C(=O)O                  |
| COc1ccc2ccc(OCC(=O)NCC(=O)NC(Cc3cccc3)C(=O)O)cc2c1                       |
| CCCCCCCCCCCCCCCC(=O)NC(C)C(=O)NC(C(C)CC)C(=O)O                           |
| COc1ccc2ccc(OCC(=O)NCC(=O)NC(Cc3c(F)c(F)c(F)c(F)c3F)C(=O)O)cc2c1         |
| COc1ccc2cc(OCC(=O)NC(CC(C)C)C(=O)NC(C)C(=O)O)ccc2c1                      |
| CC(NC(=O)COc1ccc2CCCCc2c1)C(=O)O                                         |
| OC(=O)C(Cc1c(F)c(F)c(F)c(F)c1F)NC(=O)COc2cccc3cccc23                     |
| CC(C)C(NC(=O)C(Cc1cccc1)NC(=O)COc2cccc3cccc23)C(=O)O                     |
| CC(C)CC(NC(=O)COc1cccc1)C(=O)NC(Cc2cccc2)C(=O)O                          |
| CCC(C)C(NC(=O)C(NC(=O)Cn1c2cccc2c3cccc13)C(C)C)C(=O)O                    |
| CC(C)C(NC(=O)C(C)NC(=O)COc1cccc2CCCCc12)C(=O)O                           |
| CC(C)CC(NC(=O)C(CC(C)C)NC(=O)COc1ccc2cc(ccc2c1)C#N)C(=O)O                |
| CC(NC(=O)COc1ccc2cccc2c1)C(=O)O                                          |
| CC(C)CC(NC(=O)C(CC(C)C)NC(=O)COc1ccc2cc(Br)ccc2c1)C(=O)O                 |
| CC(C)C(NC(=O)COc1ccc2CCCCc2c1)C(=O)NC(Cc3c(F)c(F)c(F)c(F)c3F)C(=O)O      |
| COc1ccc2cc(OCC(=O)NC(C(C)C)C(=O)O)ccc2c1                                 |
| OC(=O)C(Cc1cccc1)NC(=O)COc2cccc3cccc23                                   |
| CC(NC(=O)COc1cc(Cl)c2cccc2c1)C(=O)O                                      |
| CC(C)CC(NC(=O)COc1ccc2cc(ccc2c1)C#N)C(=O)NC(C)C(=O)O                     |
| CC(C)C(NC(=O)C(C)NC(=O)COc1ccc(Cl)c2cccc12)C(=O)O                        |
| CCCCCCCCCCCCCCCC(=O)NCC(=O)NC(Cc1cccc1)C(=O)O                            |
| CC(C)CC(NC(=O)C(Cc1cccc1)NC(=O)COc2cccc3cccc23)C(=O)O                    |
| CC(C)C(NC(=O)COc1ccc2cc(ccc2c1)C#N)C(=O)O                                |
| CCC(C)C(NC(=O)Cn1c2cccc2c3cccc13)C(=O)O                                  |
| CC(C)CC(NC(=O)COc1ccc2cc(Br)ccc2c1)C(=O)NC(C)C(=O)O                      |

|                                                                         |
|-------------------------------------------------------------------------|
| COc1cc2ccccc2cc1OCC(=O)NC(C)C(=O)O                                      |
| CCCCCCCCCCCCCCCC(=O)NC(C)C(=O)NC(CC(C)C)C(=O)O                          |
| CC(C)CC(NC(=O)COc1cccc2cc(ccc12)C#N)C(=O)NC(Cc3ccccc3)C(=O)O            |
| CCCCCCCCCCCCCCCC(=O)NC(C(C)CC)C(=O)NC(C)C(=O)O                          |
| CCC(C)C(NC(=O)C(CC(C)C)NC(=O)Cn1c2ccccc2c3ccccc13)C(=O)O                |
| CCC(C)C(NC(=O)COc1ccc2cc(OC)ccc2c1)C(=O)NC(CC(C)C)C(=O)O                |
| CCC(C)C(NC(=O)COc1ccc2cc(OC)ccc2c1)C(=O)NCC(=O)O                        |
| OC(=O)C(Cc1ccccc1)NC(=O)CNC(=O)COc2ccc3cc(ccc3c2)C#N                    |
| CC(C)C(NC(=O)COc1ccc(Cl)c2ccccc12)C(=O)NC(Cc3c(F)c(F)c(F)c(F)c3F)C(=O)O |
| CC(C)C(NC(=O)COc1ccc2cc(Br)ccc2c1)C(=O)NCC(=O)O                         |
| OC(=O)CNC(=O)C(Cc1ccccc1)NC(=O)COc2cccc3ccccc23                         |
| CCC(C)C(NC(=O)C(C)NC(=O)COc1ccc2ccc(OC)cc2c1)C(=O)O                     |
| CC(C)C(NC(=O)COc1ccc2CCCCc2c1)C(=O)NC(Cc3ccccc3)C(=O)O                  |
| CC(C)C(NC(=O)COc1ccc(Cl)c2ccccc12)C(=O)NC(Cc3ccccc3)C(=O)O              |
| CCCCCCCCCCCCCCCC(=O)NC(C)C(=O)NCC(=O)O                                  |
| OC(=O)C(Cc1c(F)c(F)c(F)c(F)c1F)NC(=O)CNC(=O)COc2ccc3cc(ccc3c2)C#N       |
| CC(C)C(NC(=O)COc1cccc2cc(Br)ccc12)C(=O)NC(Cc3ccccc3)C(=O)O              |
| CCCCCCCCCCCCCCCC(=O)NCC(=O)NC(Cc1ccccc1)C(=O)O                          |
| COc1ccc2cc(OCC(=O)NCC(=O)NC(Cc3ccccc3)C(=O)O)ccc2c1                     |
| CC(C)C(NC(=O)C(C)NC(=O)COc1cc(Cl)c2ccccc2c1)C(=O)O                      |
| CCC(C)C(NC(=O)C(Cc1ccccc1)NC(=O)COc2cccc3cc(Br)ccc23)C(=O)O             |
| CCC(C)C(NC(=O)COc1ccc2cc(ccc2c1)C#N)C(=O)NCC(=O)O                       |
| CC(C)C(NC(=O)COc1cccc2CCCCc12)C(=O)NC(Cc3ccccc3)C(=O)O                  |
| CC(NC(=O)COc1cccc2ccccc12)C(=O)NC(Cc3ccccc3)C(=O)O                      |
| CC(NC(=O)COc1cccc2ccccc12)C(=O)NC(Cc3c(F)c(F)c(F)c(F)c3F)C(=O)O         |
| CC(C)C(NC(=O)C(NC(=O)COc1ccc2cc(Br)ccc2c1)C(C)C)C(=O)O                  |
| COc1ccc2cc(OCC(=O)NCC(=O)NC(Cc3c(F)c(F)c(F)c(F)c3F)C(=O)O)ccc2c1        |
| CC(C)CC(NC(=O)C(NC(=O)Cn1c2ccccc2c3ccccc13)C(C)C)C(=O)O                 |
| CCC(C)C(NC(=O)COc1ccc2cc(OC)ccc2c1)C(=O)NC(C(C)C)C(=O)O                 |
| CCC(C)C(NC(=O)C(Cc1ccccc1)NC(=O)COc2ccc(Cl)c3ccccc23)C(=O)O             |
| CC(C)C(NC(=O)COc1cccc2CCCCc12)C(=O)NC(Cc3c(F)c(F)c(F)c(F)c3F)C(=O)O     |
| CCC(C)C(NC(=O)C(Cc1ccccc1)NC(=O)COc2cccc3CCCCc23)C(=O)O                 |
| CCC(C)C(NC(=O)COc1ccccc1)C(=O)NC(Cc2c(F)c(F)c(F)c(F)c2F)C(=O)O          |
| COc1ccc2ccc(OCC(=O)NC(C)C(=O)NC(CC(C)C)C(=O)O)cc2c1                     |
| OC(=O)C(Cc1c(F)c(F)c(F)c(F)c1F)NC(=O)COc2cccc3cc(ccc23)C#N              |
| COc1cc2ccccc2cc1OCC(=O)NC(C)C(=O)NC(C(C)C)C(=O)O                        |
| COc1ccc2cc(OCC(=O)NC(C(C)C)C(=O)NC(C)C(=O)O)ccc2c1                      |
| CCC(C)C(NC(=O)COc1ccc2ccc(OC)cc2c1)C(=O)NC(C)C(=O)O                     |
| OC(=O)C(Cc1ccccc1)NC(=O)COc2cccc3cc(ccc23)C#N                           |
| CCCCCCCCCCCCCCCC(=O)NC(C)C(=O)NCC(=O)O                                  |
| CCC(C)C(NC(=O)C(Cc1ccccc1)NC(=O)COc2ccc3CCCCc3c2)C(=O)O                 |
| OC(=O)C(Cc1ccccc1)NC(=O)CNC(=O)COc2ccc3cc(Br)ccc3c2                     |
| CCC(C)C(NC(=O)COc1ccc2cc(ccc2c1)C#N)C(=O)NC(CC(C)C)C(=O)O               |
| CC(C)C(NC(=O)COc1cc(Cl)c2ccccc2c1)C(=O)NC(Cc3c(F)c(F)c(F)c(F)c3F)C(=O)O |

|                                                                      |
|----------------------------------------------------------------------|
| CCC(C)C(NC(=O)COc1cccc2cc(ccc12)C#N)C(=O)NC(Cc3cccc3)C(=O)O          |
| CC(C)C(NC(=O)C(C)NC(=O)COc1ccc2CCCCc2c1)C(=O)O                       |
| OC(=O)C(Cc1c(F)c(F)c(F)c(F)c1F)NC(=O)COc2cccc2                       |
| CC(C)C(NC(=O)COc1ccc2cc(Br)ccc2c1)C(=O)O                             |
| OC(=O)C(Cc1c(F)c(F)c(F)c(F)c1F)NC(=O)COc2ccc3CCCCc3c2                |
| CCC(C)C(NC(=O)COc1cccc1)C(=O)NC(Cc2cccc2)C(=O)O                      |
| CCCCCCCCCCCCC(=O)NC(C)C(=O)NC(C(C)C)C(=O)O                           |
| CC(C)C(NC(=O)COc1ccc2cc(ccc2c1)C#N)C(=O)NC(C)C(=O)O                  |
| CC(C)CC(NC(=O)COc1ccc2cc(Br)ccc12)C(=O)NC(Cc3cccc3)C(=O)O            |
| CCC(C)C(NC(=O)COc1ccc2cc(ccc2c1)C#N)C(=O)NC(C(C)C)C(=O)O             |
| CC(C)CC(NC(=O)COc1ccc2CCCCc2c1)C(=O)NC(Cc3c(F)c(F)c(F)c(F)c3F)C(=O)O |
| CC(C)CC(NC(=O)C(Cc1cccc1)NC(=O)COc2cccc2)C(=O)O                      |
| CC(C)C(NC(=O)COc1cc(Cl)c2cccc2c1)C(=O)NC(Cc3cccc3)C(=O)O             |
| CC(C)C(NC(=O)C(C)NC(=O)COc1ccc2cccc2c1)C(=O)O                        |
| CCC(C)C(NC(=O)COc1ccc2cc(Br)ccc2c1)C(=O)NCC(=O)O                     |
| OC(=O)CNC(=O)C(Cc1cccc1)NC(=O)COc2cccc3cc(ccc23)C#N                  |
| OC(=O)C(Cc1c(F)c(F)c(F)c(F)c1F)NC(=O)CNC(=O)COc2ccc3cc(Br)ccc3c2     |
| CCCCCCCCCCCCC(=O)NC(Cc1c(F)c(F)c(F)c(F)c1F)C(=O)O                    |
| COc1cc2cccc2cc1OCC(=O)NC(C(C)C)C(=O)NC(Cc3cccc3)C(=O)O               |
| CC(C)CC(NC(=O)COc1ccc(Cl)c2cccc12)C(=O)NC(Cc3cccc3)C(=O)O            |
| OC(=O)C(Cc1cccc1)NC(=O)COc2cccc2                                     |
| OC(=O)CNC(=O)C(Cc1cccc1)NC(=O)COc2ccc3CCCCc3c2                       |
| CCC(C)C(NC(=O)C(Cc1cccc1)NC(=O)COc2ccc3cccc3c2)C(=O)O                |
| CCC(C)C(NC(=O)C(NC(=O)Cn1c2cccc2c3cccc13)C(C)CC)C(=O)O               |
| CCC(C)C(NC(=O)C(Cc1cccc1)NC(=O)COc2cc(Cl)c3cccc3c2)C(=O)O            |
| CC(NC(=O)COc1cccc2cc(Br)ccc12)C(=O)NCC(=O)O                          |
| OC(=O)C(Cc1c(F)c(F)c(F)c(F)c1F)NC(=O)COc2ccc3cccc3c2                 |
| CC(C)C(NC(=O)COc1ccc2cccc2c1)C(=O)NC(Cc3cccc3)C(=O)O                 |
| CCC(C)C(NC(=O)C(Cc1cccc1)NC(=O)COc2cc3cccc3cc2OC)C(=O)O              |
| CC(C)CC(NC(=O)C(Cc1cccc1)NC(=O)COc2cccc3cc(ccc23)C#N)C(=O)O          |
| COc1cc2cccc2cc1OCC(=O)NC(C(C)C)C(=O)NC(Cc3c(F)c(F)c(F)c(F)c3F)C(=O)O |
| OC(=O)C(Cc1cccc1)NC(=O)COc2ccc3cccc3c2                               |
| CC(C)C(NC(=O)C(Cc1cccc1)NC(=O)COc2cccc3cc(ccc23)C#N)C(=O)O           |
| CCCCCCCCCCCCC(=O)NC(C)C(=O)NC(C(C)C)C(=O)O                           |
| CCC(C)C(NC(=O)COc1ccc2cc(Br)ccc2c1)C(=O)NC(CC(C)C)C(=O)O             |
| COc1ccc2cc(OCC(=O)NC(C)C(=O)NC(CC(C)C)C(=O)O)ccc2c1                  |
| CC(C)CC(NC(=O)C(C)NC(=O)COc1ccc2cc(ccc2c1)C#N)C(=O)O                 |
| OC(=O)C(Cc1c(F)c(F)c(F)c(F)c1F)NC(=O)COc2cccc3cc(Br)ccc23            |
| CC(C)C(NC(=O)COc1ccc2cccc2c1)C(=O)NC(Cc3c(F)c(F)c(F)c(F)c3F)C(=O)O   |
| OC(=O)CNC(=O)C(Cc1cccc1)NC(=O)COc2cccc3CCCCc23                       |
| OC(=O)C(Cc1cccc1)NC(=O)COc2cccc3cc(Br)ccc23                          |
| CCCCCCCCCCCCC(=O)NC(C(C)C)C(=O)NC(Cc1c(F)c(F)c(F)c(F)c1F)C(=O)O      |
| OC(=O)CNC(=O)C(Cc1cccc1)NC(=O)COc2ccc3cccc3c2                        |
| CC(C)CC(NC(=O)COc1ccc2CCCCc2c1)C(=O)NC(Cc3cccc3)C(=O)O               |

|                                                                      |
|----------------------------------------------------------------------|
| COc1cc2ccccc2cc1OCC(=O)NC(Cc3c(F)c(F)c(F)c(F)c3F)C(=O)O              |
| OC(=O)C(Cc1cccc1)NC(=O)COc2ccc3CCCCc3c2                              |
| CC(C)CC(NC(=O)C(C)NC(=O)COc1ccc2cc(Br)ccc2c1)C(=O)O                  |
| COc1cc2ccccc2cc1OCC(=O)NC(Cc3cccc3)C(=O)O                            |
| CCCCCCCCCCCCC(=O)NC(Cc1c(F)c(F)c(F)c(F)c1F)C(=O)O                    |
| CCC(C)C(NC(=O)C(C)NC(=O)COc1ccc2cc(OC)ccc2c1)C(=O)O                  |
| OC(=O)CNC(=O)C(Cc1cccc1)NC(=O)COc2cccc3cc(Br)ccc23                   |
| CCC(C)C(NC(=O)C(C)NC(=O)COc1ccc2cc(ccc2c1)C#N)C(=O)O                 |
| CC(C)CC(NC(=O)COc1ccc2ccccc2c1)C(=O)NC(Cc3c(F)c(F)c(F)c(F)c3F)C(=O)O |
| CC(C)C(NC(=O)C(Cc1cccc1)NC(=O)COc2cccc2)C(=O)O                       |
| CC(NC(=O)COc1ccc2cc(ccc12)C#N)C(=O)NC(Cc3cccc3)C(=O)O                |
| CC(C)CC(NC(=O)COc1ccc2ccccc2c1)C(=O)NC(Cc3cccc3)C(=O)O               |
| COc1cc2ccccc2cc1OCC(=O)NC(CC(C)C)C(=O)NC(Cc3cccc3)C(=O)O             |
| OC(=O)C(Cc1c(F)c(F)c(F)c(F)c1F)NC(=O)COc2ccc(Cl)c3cccc23             |
| CC(C)CC(NC(=O)COc1cc(Cl)c2ccccc2c1)C(=O)NC(Cc3cccc3)C(=O)O           |
| CCC(C)C(NC(=O)COc1ccc(Cl)c2ccccc12)C(=O)NC(Cc3cccc3)C(=O)O           |
| OC(=O)C(Cc1c(F)c(F)c(F)c(F)c1F)NC(=O)CNC(=O)Cn2c3cccc3c4cccc24       |
| CCC(C)C(NC(=O)COc1ccc2cc(OC)ccc2c1)C(=O)NC(C)C(=O)O                  |
| OC(=O)C(Cc1cccc1)NC(=O)COc2ccc(Cl)c3cccc23                           |
| CC(NC(=O)COc1ccc2cc(Br)ccc12)C(=O)NC(Cc3cccc3)C(=O)O                 |
| CC(C)CC(NC(=O)COc1ccc2CCCCc12)C(=O)NC(Cc3cccc3)C(=O)O                |
| CC(NC(=O)COc1ccc2cc(ccc12)C#N)C(=O)NC(Cc3c(F)c(F)c(F)c(F)c3F)C(=O)O  |
| OC(=O)C(Cc1cccc1)NC(=O)CNC(=O)Cn2c3cccc3c4cccc24                     |
| CC(C)CC(NC(=O)Cn1c2ccccc2c3cccc13)C(=O)NC(C(C)C)C(=O)O               |
| CC(C)C(NC(=O)C(Cc1cccc1)NC(=O)COc2cccc3CCCCc23)C(=O)O                |
| OC(=O)CNC(=O)C(Cc1cccc1)NC(=O)COc2ccc(Cl)c3cccc23                    |
| CC(C)CC(NC(=O)COc1ccc2CCCCc12)C(=O)NC(Cc3c(F)c(F)c(F)c(F)c3F)C(=O)O  |
| CC(C)C(NC(=O)COc1ccc2cc(Br)ccc2c1)C(=O)NC(C)C(=O)O                   |
| COc1cc2ccccc2cc1OCC(=O)NC(Cc3cccc3)C(=O)NCC(=O)O                     |
| COc1ccc2ccc(OCC(=O)NC(C)C(=O)O)cc2c1                                 |
| CCC(C)C(NC(=O)COc1ccc2cc(Br)ccc2c1)C(=O)NC(C(C)C)C(=O)O              |
| CC(C)CC(NC(=O)C(Cc1cccc1)NC(=O)COc2cccc3cc(Br)ccc23)C(=O)O           |
| CC(NC(=O)C(C)NC(=O)COc1ccc2cc(Br)ccc12)C(=O)O                        |
| CCCCCCCCCCCCC(=O)NC(Cc1cccc1)C(=O)NCC(=O)O                           |
| OC(=O)C(Cc1c(F)c(F)c(F)c(F)c1F)NC(=O)COc2cc(Cl)c3cccc3c2             |
| CCC(C)C(NC(=O)Cn1c2ccccc2c3cccc13)C(=O)NCC(=O)O                      |
| OC(=O)C(Cc1cccc1)NC(=O)COc2cccc3CCCCc23                              |
| CCC(C)C(NC(=O)COc1ccc2cc(Br)ccc12)C(=O)NC(Cc3cccc3)C(=O)O            |
| CCCCCCCCCCCCC(=O)NC(Cc1cccc1)C(=O)O                                  |
| OC(=O)C(Cc1cccc1)NC(=O)COc2cc(Cl)c3cccc3c2                           |
| CC(C)C(NC(=O)C(Cc1cccc1)NC(=O)COc2ccc3CCCCc3c2)C(=O)O                |
| OC(=O)CNC(=O)C(Cc1cccc1)NC(=O)COc2cc(Cl)c3cccc3c2                    |
| CCC(C)C(NC(=O)COc1ccc2cc(ccc2c1)C#N)C(=O)NC(C)C(=O)O                 |
| CCC(C)C(NC(=O)Cn1c2ccccc2c3cccc13)C(=O)NC(CC(C)C)C(=O)O              |



|                                                                         |
|-------------------------------------------------------------------------|
| OC(=O)C(Cc1c(F)c(F)c(F)c(F)c1F)NC(=O)COc2cccc3CCCCc23                   |
| CC(C)CC(NC(=O)C(CC(C)C)NC(=O)Cn1c2cccc2c3cccc13)C(=O)O                  |
| CC(C)CC(NC(=O)C(Cc1cccc1)NC(=O)COc2ccc(Cl)c3cccc23)C(=O)O               |
| CCCCCCCCCCCCC(=O)NC(C)C(=O)NC(C)C(=O)O                                  |
| CCC(C)C(NC(=O)COc1ccc2CCCCc2c1)C(=O)NC(Cc3c(F)c(F)c(F)c(F)c3F)C(=O)O    |
| CCCCCCCCCCCCC(=O)NC(C(C)C)C(=O)NC(Cc1cccc1)C(=O)O                       |
| CCC(C)C(NC(=O)COc1cccc2CCCCc12)C(=O)NC(Cc3cccc3)C(=O)O                  |
| COc1ccc2ccc(OCC(=O)NC(Cc3c(F)c(F)c(F)c(F)c3F)C(=O)O)cc2c1               |
| COc1ccc2ccc(OCC(=O)NC(Cc3cccc3)C(=O)O)cc2c1                             |
| CC(C)C(NC(=O)C(Cc1cccc1)NC(=O)COc2cccc3cc(Br)ccc23)C(=O)O               |
| CC(NC(=O)C(C)NC(=O)COc1cccc2CCCCc12)C(=O)O                              |
| CC(NC(=O)C(Cc1cccc1)NC(=O)COc2cccc3cccc23)C(=O)O                        |
| CC(C)CC(NC(=O)C(Cc1cccc1)NC(=O)COc2cccc3CCCCc23)C(=O)O                  |
| CC(NC(=O)CNC(=O)COc1ccc2cc(Br)ccc2c1)C(=O)O                             |
| CCC(C)C(NC(=O)C(Cc1cccc1)NC(=O)COc2ccc3ccc(OC)cc3c2)C(=O)O              |
| CC(C)C(NC(=O)C(Cc1cccc1)NC(=O)COc2ccc(Cl)c3cccc23)C(=O)O                |
| CC(NC(=O)COc1ccc(Cl)c2cccc12)C(=O)NC(Cc3cccc3)C(=O)O                    |
| CCC(C)C(NC(=O)C(C)NC(=O)COc1ccc2cc(Br)ccc2c1)C(=O)O                     |
| CCCCCCCCCCCCC(=O)NC(Cc1cccc1)C(=O)NCC(=O)O                              |
| CC(C)CC(NC(=O)C(Cc1cccc1)NC(=O)COc2ccc3CCCCc3c2)C(=O)O                  |
| CCC(C)C(NC(=O)COc1cccc2CCCCc12)C(=O)NC(Cc3c(F)c(F)c(F)c(F)c3F)C(=O)O    |
| CC(NC(=O)COc1cccc1)C(=O)NC(Cc2cccc2)C(=O)O                              |
| COc1ccc2ccc(OCC(=O)NC(C(C)C)C(=O)NC(Cc3cccc3)C(=O)O)cc2c1               |
| COc1ccc2ccc(OCC(=O)NC(Cc3cccc3)C(=O)NCC(=O)O)cc2c1                      |
| CCCCCCCCCCCCC(=O)NC(Cc1cccc1)C(=O)O                                     |
| CCCCCCCCCCCCC(=O)NC(Cc1cccc1)C(=O)NC(C(C)CC)C(=O)O                      |
| CC(C)C(NC(=O)C(NC(=O)Cn1c2cccc2c3cccc13)C(C)C)C(=O)O                    |
| CC(NC(=O)C(C)NC(=O)COc1ccc(Cl)c2cccc12)C(=O)O                           |
| CC(NC(=O)COc1cccc2CCCCc12)C(=O)NC(Cc3cccc3)C(=O)O                       |
| CC(NC(=O)COc1cccc1)C(=O)NC(Cc2c(F)c(F)c(F)c(F)c2F)C(=O)O                |
| COc1cc2cccc2cc1OCC(=O)NC(Cc3cccc3)C(=O)NC(CC(C)C)C(=O)O                 |
| CC(C)C(NC(=O)C(Cc1cccc1)NC(=O)COc2ccc3cccc3c2)C(=O)O                    |
| CCCCCCCCCCCCC(=O)NC(C(C)C)C(=O)NC(Cc1cccc1)C(=O)O                       |
| CCCCCCCCCCCCC(=O)NC(C)C(=O)NC(C)C(=O)O                                  |
| CC(NC(=O)COc1cc(Cl)c2cccc2c1)C(=O)NC(Cc3cccc3)C(=O)O                    |
| CC(C)CC(NC(=O)C(Cc1cccc1)NC(=O)COc2ccc3cccc3c2)C(=O)O                   |
| CCC(C)C(NC(=O)COc1cc(Cl)c2cccc2c1)C(=O)NC(Cc3cccc3)C(=O)O               |
| COc1ccc2ccc(OCC(=O)NC(C(C)C)C(=O)NC(Cc3c(F)c(F)c(F)c(F)c3F)C(=O)O)cc2c1 |
| CCC(C)C(NC(=O)COc1ccc2cc(Br)ccc2c1)C(=O)NC(C)C(=O)O                     |
| CC(NC(=O)COc1ccc2CCCCc2c1)C(=O)NC(Cc3cccc3)C(=O)O                       |
| CC(C)CC(NC(=O)Cn1c2cccc2c3cccc13)C(=O)NC(C)C(=O)O                       |
| CC(NC(=O)C(C)NC(=O)COc1cc(Cl)c2cccc2c1)C(=O)O                           |
| COc1cc2cccc2cc1OCC(=O)NC(Cc3cccc3)C(=O)NC(C(C)C)C(=O)O                  |
| COc1ccc2cc(OCC(=O)NC(Cc3cccc3)C(=O)O)ccc2c1                             |

|                                                                                       |
|---------------------------------------------------------------------------------------|
| <chem>CC(C)CC(NC(=O)C(Cc1ccccc1)NC(=O)COc2cc(Cl)c3ccccc3c2)C(=O)O</chem>              |
| <chem>CCC(C)C(NC(=O)COc1ccc2CCCCc2c1)C(=O)NC(Cc3ccccc3)C(=O)O</chem>                  |
| <chem>CCC(C)C(NC(=O)COc1cc2ccccc2cc1OC)C(=O)NC(Cc3ccccc3)C(=O)O</chem>                |
| <chem>CCCCCCCCCCCCCCCC(=O)NC(Cc1ccccc1)C(=O)NC(C(C)CC)C(=O)O</chem>                   |
| <chem>CC(NC(=O)COc1cccc2CCCCc12)C(=O)NC(Cc3c(F)c(F)c(F)c(F)c3F)C(=O)O</chem>          |
| <chem>CCC(C)C(NC(=O)C(Cc1ccccc1)NC(=O)COc2ccc3cc(ccc3c2)C#N)C(=O)O</chem>             |
| <chem>CC(NC(=O)COc1ccc2ccccc2c1)C(=O)NC(Cc3ccccc3)C(=O)O</chem>                       |
| <chem>CC(C)C(NC(=O)C(Cc1ccccc1)NC(=O)COc2cc(Cl)c3ccccc3c2)C(=O)O</chem>               |
| <chem>CC(NC(=O)COc1ccc(Cl)c2ccccc12)C(=O)NC(Cc3c(F)c(F)c(F)c(F)c3F)C(=O)O</chem>      |
| <chem>COc1ccc2cc(OCC(=O)NC(Cc3c(F)c(F)c(F)c(F)c3F)C(=O)O)ccc2c1</chem>                |
| <chem>CCC(C)C(NC(=O)Cn1c2ccccc2c3ccccc13)C(=O)NC(C(C)C)C(=O)O</chem>                  |
| <chem>COc1ccc2ccc(OCC(=O)NC(CC(C)C)C(=O)NC(Cc3ccccc3)C(=O)O)cc2c1</chem>              |
| <chem>CC(C)C(NC(=O)Cn1c2ccccc2c3ccccc13)C(=O)O</chem>                                 |
| <chem>CCC(C)C(NC(=O)C(Cc1ccccc1)NC(=O)COc2ccc3cc(OC)ccc3c2)C(=O)O</chem>              |
| <chem>CC(NC(=O)C(C)NC(=O)COc1ccc2CCCCc2c1)C(=O)O</chem>                               |
| <chem>CC(NC(=O)COc1ccc2ccccc2c1)C(=O)NC(Cc3c(F)c(F)c(F)c(F)c3F)C(=O)O</chem>          |
| <chem>CCCCCCCCCCCCCCCC(=O)NC(CC(C)C)C(=O)NC(Cc1ccccc1)C(=O)O</chem>                   |
| <chem>CC(NC(=O)COc1ccc2CCCCc2c1)C(=O)NC(Cc3c(F)c(F)c(F)c(F)c3F)C(=O)O</chem>          |
| <chem>COc1ccc2cc(OCC(=O)NC(Cc3ccccc3)C(=O)NCC(=O)O)ccc2c1</chem>                      |
| <chem>COc1ccc2cc(OCC(=O)NC(C)C(=O)O)ccc2c1</chem>                                     |
| <chem>COc1ccc2cc(OCC(=O)NC(C(C)C)C(=O)NC(Cc3ccccc3)C(=O)O)ccc2c1</chem>               |
| <chem>OC(=O)CNC(=O)C(Cc1ccccc1)NC(=O)COc2ccc3cc(ccc3c2)C#N</chem>                     |
| <chem>COc1cc2ccccc2cc1OCC(=O)NC(C)C(=O)NC(Cc3ccccc3)C(=O)O</chem>                     |
| <chem>CC(NC(=O)COc1ccc2cc(ccc2c1)C#N)C(=O)O</chem>                                    |
| <chem>COc1cc2ccccc2cc1OCC(=O)NC(C)C(=O)NC(Cc3c(F)c(F)c(F)c(F)c3F)C(=O)O</chem>        |
| <chem>CC(C)C(NC(=O)COc1ccc2cc(ccc2c1)C#N)C(=O)NC(Cc3ccccc3)C(=O)O</chem>              |
| <chem>COc1ccc2ccc(OCC(=O)NC(C)C(=O)NC(C(C)C)C(=O)O)cc2c1</chem>                       |
| <chem>CC(NC(=O)C(Cc1ccccc1)NC(=O)COc2ccc3cc(ccc23)C#N)C(=O)O</chem>                   |
| <chem>CC(C)CC(NC(=O)COc1ccc2cc(ccc2c1)C#N)C(=O)NC(Cc3ccccc3)C(=O)O</chem>             |
| <chem>CC(C)CC(NC(=O)C(C)NC(=O)Cn1c2ccccc2c3ccccc13)C(=O)O</chem>                      |
| <chem>CCCCCCCCCCCCCCCC(=O)NC(CC(C)C)C(=O)NC(Cc1ccccc1)C(=O)O</chem>                   |
| <chem>CC(NC(=O)COc1cc(Cl)c2ccccc2c1)C(=O)NC(Cc3c(F)c(F)c(F)c(F)c3F)C(=O)O</chem>      |
| <chem>OC(=O)C(Cc1ccccc1)NC(=O)COc2ccc3cc(ccc3c2)C#N</chem>                            |
| <chem>COc1ccc2cc(OCC(=O)NC(C(C)C)C(=O)NC(Cc3c(F)c(F)c(F)c(F)c3F)C(=O)O)ccc2c1</chem>  |
| <chem>COc1ccc2cc(OCC(=O)NC(CC(C)C)C(=O)NC(Cc3ccccc3)C(=O)O)ccc2c1</chem>              |
| <chem>CC(C)C(NC(=O)COc1ccc2cc(ccc2c1)C#N)C(=O)NC(Cc3c(F)c(F)c(F)c(F)c3F)C(=O)O</chem> |
| <chem>OC(=O)C(Cc1c(F)c(F)c(F)c(F)c1F)NC(=O)COc2ccc3cc(ccc3c2)C#N</chem>               |
| <chem>CCC(C)C(NC(=O)C(C)NC(=O)Cn1c2ccccc2c3ccccc13)C(=O)O</chem>                      |
| <chem>CCCCCCCCCCCCCCCC(=O)NC(Cc1ccccc1)C(=O)NC(C(C)C)C(=O)O</chem>                    |
| <chem>OC(=O)CNC(=O)C(Cc1ccccc1)NC(=O)COc2ccc3cc(Br)ccc3c2</chem>                      |
| <chem>CC(NC(=O)C(Cc1ccccc1)NC(=O)COc2ccc3CCCCc23)C(=O)O</chem>                        |
| <chem>CCCCCCCCCCCCCCCC(=O)NC(Cc1ccccc1)C(=O)NC(CC(C)C)C(=O)O</chem>                   |
| <chem>COc1ccc2ccc(OCC(=O)NC(Cc3ccccc3)C(=O)NC(CC(C)C)C(=O)O)cc2c1</chem>              |
| <chem>CC(C)C(NC(=O)Cn1c2ccccc2c3ccccc13)C(=O)NC(C)C(=O)O</chem>                       |

|                                                                         |
|-------------------------------------------------------------------------|
| CCC(C)C(NC(=O)C(Cc1ccccc1)NC(=O)COc2ccc3cc(Br)ccc3c2)C(=O)O             |
| OC(=O)C(Cc1ccccc1)NC(=O)COc2ccc3cc(Br)ccc3c2                            |
| OC(=O)C(Cc1c(F)c(F)c(F)c(F)c1F)NC(=O)COc2ccc3cc(Br)ccc3c2               |
| CC(NC(=O)C(Cc1ccccc1)NC(=O)COc2ccccc2)C(=O)O                            |
| COc1ccc2ccc(OCC(=O)NC(Cc3ccccc3)C(=O)NC(C(C)C)C(=O)O)cc2c1              |
| CC(NC(=O)C(Cc1ccccc1)NC(=O)COc2ccc3cc(Br)ccc23)C(=O)O                   |
| CCCCCCCCCCCCCCCC(=O)NC(Cc1ccccc1)C(=O)NC(C(C)C)C(=O)O                   |
| CCCCCCCCCCCCCCCC(=O)NC(C(C)CC)C(=O)NC(Cc1ccccc1)C(=O)O                  |
| CC(NC(=O)COc1ccc2cc(Br)ccc2c1)C(=O)O                                    |
| CCCCCCCCCCCCCCCC(=O)NC(Cc1ccccc1)C(=O)NC(CC(C)C)C(=O)O                  |
| CCC(C)C(NC(=O)COc1ccc2ccccc2c1)C(=O)NC(Cc3c(F)c(F)c(F)c(F)c3F)C(=O)O    |
| CC(NC(=O)C(Cc1ccccc1)NC(=O)COc2ccc3CCCCc3c2)C(=O)O                      |
| CCC(C)C(NC(=O)Cn1c2ccccc2c3ccccc13)C(=O)NC(C)C(=O)O                     |
| CC(C)CC(NC(=O)COc1ccc2cc(Br)ccc2c1)C(=O)NC(Cc3ccccc3)C(=O)O             |
| COc1ccc2ccc(OCC(=O)NC(C)C(=O)NC(Cc3ccccc3)C(=O)O)cc2c1                  |
| CC(C)C(NC(=O)COc1ccc2cc(Br)ccc2c1)C(=O)NC(Cc3ccccc3)C(=O)O              |
| CC(C)CC(NC(=O)C(Cc1ccccc1)NC(=O)COc2ccc3cc(ccc3c2)C#N)C(=O)O            |
| CCCCCCCCCCCCCCCC(=O)NC(C)C(=O)NC(Cc1c(F)c(F)c(F)c(F)c1F)C(=O)O          |
| COc1ccc2cc(OCC(=O)NC(Cc3ccccc3)C(=O)NC(CC(C)C)C(=O)O)ccc2c1             |
| CCCCCCCCCCCCCCCC(=O)NC(C(C)CC)C(=O)NC(Cc1ccccc1)C(=O)O                  |
| CCC(C)C(NC(=O)COc1ccc2ccccc2c1)C(=O)NC(Cc3ccccc3)C(=O)O                 |
| CC(NC(=O)C(Cc1ccccc1)NC(=O)COc2ccc3ccccc3c2)C(=O)O                      |
| CC(NC(=O)COc1ccc2cc(Br)ccc2c1)C(=O)NC(Cc3ccccc3)C(=O)O                  |
| CCCCCCCCCCCCCCCC(=O)NC(C)C(=O)NC(Cc1c(F)c(F)c(F)c(F)c1F)C(=O)O          |
| CC(NC(=O)C(Cc1ccccc1)NC(=O)COc2ccc(Cl)c3ccccc23)C(=O)O                  |
| CC(NC(=O)COc1ccc2cc(ccc2c1)C#N)C(=O)NC(Cc3ccccc3)C(=O)O                 |
| CCCCCCCCCCCCCCCC(=O)NC(C)C(=O)NC(Cc1ccccc1)C(=O)O                       |
| COc1ccc2cc(OCC(=O)NC(C)C(=O)NC(C(C)C)C(=O)O)ccc2c1                      |
| COc1ccc2cc(OCC(=O)NC(C)C(=O)NC(Cc3ccccc3)C(=O)O)ccc2c1                  |
| COc1ccc2cc(OCC(=O)NC(Cc3ccccc3)C(=O)NC(C(C)C)C(=O)O)ccc2c1              |
| CCCCCCCCCCCCCCCC(=O)NC(C)C(=O)NC(Cc1ccccc1)C(=O)O                       |
| CC(NC(=O)C(Cc1ccccc1)NC(=O)COc2cc(Cl)c3ccccc3c2)C(=O)O                  |
| COc1ccc2ccc(OCC(=O)NC(C)C(=O)NC(Cc3c(F)c(F)c(F)c(F)c3F)C(=O)O)cc2c1     |
| COc1cc2ccccc2cc1OCC(=O)NC(Cc3ccccc3)C(=O)NC(C)C(=O)O                    |
| CC(C)C(NC(=O)C(Cc1ccccc1)NC(=O)COc2ccc3cc(ccc3c2)C#N)C(=O)O             |
| CC(C)C(NC(=O)C(C)NC(=O)COc1ccc2cc(ccc2c1)C#N)C(=O)O                     |
| CC(C)CC(NC(=O)C(Cc1ccccc1)NC(=O)COc2ccc3cc(Br)ccc3c2)C(=O)O             |
| CCC(C)C(NC(=O)COc1ccc2ccc(OC)cc2c1)C(=O)NC(Cc3ccccc3)C(=O)O             |
| CC(C)C(NC(=O)Cn1c2ccccc2c3ccccc13)C(=O)NC(Cc4c(F)c(F)c(F)c(F)c4F)C(=O)O |
| CCC(C)C(NC(=O)C(Cc1ccccc1)NC(=O)Cn2c3ccccc3c4ccccc24)C(=O)O             |
| CC(C)C(NC(=O)Cn1c2ccccc2c3ccccc13)C(=O)NC(Cc4ccccc4)C(=O)O              |
| CC(NC(=O)COc1ccc2cc(ccc2c1)C#N)C(=O)NC(Cc3c(F)c(F)c(F)c(F)c3F)C(=O)O    |
| COc1ccc2cc(OCC(=O)NC(C)C(=O)NC(Cc3c(F)c(F)c(F)c(F)c3F)C(=O)O)ccc2c1     |
| CC(C)CC(NC(=O)Cn1c2ccccc2c3ccccc13)C(=O)NC(Cc4ccccc4)C(=O)O             |

|                                                                                  |
|----------------------------------------------------------------------------------|
| <chem>COc1ccc2ccc(OCC(=O)NC(Cc3ccccc3)C(=O)NC(C)C(=O)O)cc2c1</chem>              |
| <chem>OC(=O)CNC(=O)C(Cc1ccccc1)NC(=O)Cn2c3ccccc3c4ccccc24</chem>                 |
| <chem>CCCCCCCCCCCC(=O)NC(Cc1ccccc1)C(=O)NC(C)C(=O)O</chem>                       |
| <chem>CCC(C)C(NC(=O)COc1ccc2cc(OC)ccc2c1)C(=O)NC(Cc3ccccc3)C(=O)O</chem>         |
| <chem>CC(C)C(NC(=O)C(Cc1ccccc1)NC(=O)COc2ccc3cc(Br)ccc3c2)C(=O)O</chem>          |
| <chem>CCC(C)C(NC(=O)COc1ccc2cc(ccc2c1)C#N)C(=O)NC(Cc3ccccc3)C(=O)O</chem>        |
| <chem>CCCCCCCCCCCCCCCC(=O)NC(Cc1ccccc1)C(=O)NC(C)C(=O)O</chem>                   |
| <chem>CC(NC(=O)C(Cc1ccccc1)NC(=O)COc2ccc3cc(ccc3c2)C#N)C(=O)O</chem>             |
| <chem>COc1ccc2cc(OCC(=O)NC(Cc3ccccc3)C(=O)NC(C)C(=O)O)ccc2c1</chem>              |
| <chem>CC(C)C(NC(=O)C(C)NC(=O)COc1ccc2cc(Br)ccc2c1)C(=O)O</chem>                  |
| <chem>OC(=O)C(Cc1c(F)c(F)c(F)c(F)c1F)NC(=O)Cn2c3ccccc3c4ccccc24</chem>           |
| <chem>CC(C)CC(NC(=O)C(Cc1ccccc1)NC(=O)Cn2c3ccccc3c4ccccc24)C(=O)O</chem>         |
| <chem>OC(=O)C(Cc1ccccc1)NC(=O)Cn2c3ccccc3c4ccccc24</chem>                        |
| <chem>CC(NC(=O)Cn1c2ccccc2c3ccccc13)C(=O)O</chem>                                |
| <chem>CC(NC(=O)COc1ccc2cc(Br)ccc2c1)C(=O)NCC(=O)O</chem>                         |
| <chem>CC(NC(=O)C(Cc1ccccc1)NC(=O)COc2ccc3cc(Br)ccc3c2)C(=O)O</chem>              |
| <chem>CCC(C)C(NC(=O)Cn1c2ccccc2c3ccccc13)C(=O)NC(Cc4ccccc4)C(=O)O</chem>         |
| <chem>CC(NC(=O)Cn1c2ccccc2c3ccccc13)C(=O)NC(Cc4ccccc4)C(=O)O</chem>              |
| <chem>CC(C)C(NC(=O)C(C)NC(=O)Cn1c2ccccc2c3ccccc13)C(=O)O</chem>                  |
| <chem>CC(C)C(NC(=O)C(Cc1ccccc1)NC(=O)Cn2c3ccccc3c4ccccc24)C(=O)O</chem>          |
| <chem>CCC(C)C(NC(=O)COc1ccc2cc(Br)ccc2c1)C(=O)NC(Cc3ccccc3)C(=O)O</chem>         |
| <chem>CC(NC(=O)Cn1c2ccccc2c3ccccc13)C(=O)NC(Cc4c(F)c(F)c(F)c(F)c4F)C(=O)O</chem> |
| <chem>CC(NC(=O)C(C)NC(=O)COc1ccc2cc(Br)ccc2c1)C(=O)O</chem>                      |
| <chem>CCCCCCCCCCCCCCCC(=O)NC(Cc1ccccc1)C(=O)NC(Cc2ccccc2)C(=O)O</chem>           |
| <chem>CCCCCCCCCCCCCCCC(=O)NC(Cc1ccccc1)C(=O)NC(Cc2ccccc2)C(=O)O</chem>           |
| <chem>CC(NC(=O)C(Cc1ccccc1)NC(=O)Cn2c3ccccc3c4ccccc24)C(=O)O</chem>              |
| <chem>OC(=O)C(Cc1ccccc1)NC(=O)C(Cc2ccccc2)NC(=O)COc3ccccc3</chem>                |
| <chem>OC(=O)C(Cc1ccccc1)NC(=O)C(Cc2ccccc2)NC(=O)COc3cccc4ccccc34</chem>          |
| <chem>OC(=O)C(Cc1ccccc1)NC(=O)C(Cc2ccccc2)NC(=O)COc3cccc4CCCCc34</chem>          |
| <chem>OC(=O)C(Cc1c(F)c(F)c(F)c(F)c1F)NC(=O)C(Cc2ccccc2)NC(=O)COc3ccccc3</chem>   |
| <chem>OC(=O)C(Cc1ccccc1)NC(=O)C(Cc2ccccc2)NC(=O)COc3cccc4cc(ccc34)C#N</chem>     |
| <chem>OC(=O)C(Cc1ccccc1)NC(=O)C(Cc2ccccc2)NC(=O)COc3ccc4CCCCc4c3</chem>          |
| <chem>COc1cc2ccccc2cc1OCC(=O)NC(Cc3ccccc3)C(=O)NC(Cc4ccccc4)C(=O)O</chem>        |
| <chem>OC(=O)C(Cc1ccccc1)NC(=O)C(Cc2ccccc2)NC(=O)COc3cccc4cc(Br)ccc34</chem>      |
| <chem>COc1ccc2ccc(OCC(=O)NC(Cc3ccccc3)C(=O)NC(Cc4ccccc4)C(=O)O)cc2c1</chem>      |
| <chem>OC(=O)C(Cc1ccccc1)NC(=O)C(Cc2ccccc2)NC(=O)COc3ccc(Cl)c4ccccc34</chem>      |
| <chem>OC(=O)C(Cc1ccccc1)NC(=O)C(Cc2ccccc2)NC(=O)COc3ccc4ccccc4c3</chem>          |
| <chem>OC(=O)C(Cc1ccccc1)NC(=O)C(Cc2ccccc2)NC(=O)COc3cc(Cl)c4ccccc4c3</chem>      |
| <chem>COc1ccc2cc(OCC(=O)NC(Cc3ccccc3)C(=O)NC(Cc4ccccc4)C(=O)O)ccc2c1</chem>      |
| <chem>OC(=O)C(Cc1ccccc1)NC(=O)C(Cc2ccccc2)NC(=O)COc3ccc4cc(ccc4c3)C#N</chem>     |
| <chem>OC(=O)C(Cc1ccccc1)NC(=O)C(Cc2ccccc2)NC(=O)COc3ccc4cc(Br)ccc4c3</chem>      |
| <chem>OC(=O)C(Cc1ccccc1)NC(=O)C(Cc2ccccc2)NC(=O)Cn3c4ccccc4c5ccccc35</chem>      |

**Table S5** List of compound codes and SMILES codes. The codes in the right hand column can be used to request predictions from the authors

## References

- (1) Chen, L.; Revel, S.; Morris, K.; Serpell, L. C.; Adams, D. J. *Langmuir* **2010**, *26*, 13466.
- (2) Chen, L.; Morris, K.; Laybourn, A.; Elias, D.; Hicks, M. R.; Rodger, A.; Serpell, L.; Adams, D. J. *Langmuir* **2010**, *26*, 5232.
- (3) Houton, K. A.; Morris, K. L.; Chen, L.; Schmidtman, M.; Jones, J. T. A.; Serpell, L. C.; Lloyd, G. O.; Adams, D. J. *Langmuir* **2012**, *28*, 9797.
- (4) Raeburn, J.; McDonald, T. O.; Adams, D. J. *Chemical Communications* **2012**, *48*, 9355.
- (5) Chen, L.; McDonald, T. O.; Adams, D. J. *RSC Advances* **2013**, *3*, 8714.
- (6) Colquhoun, C.; Draper, E. R.; Eden, E. G. B.; Cattoz, B. N.; Morris, K. L.; Chen, L.; McDonald, T. O.; Terry, A. E.; Griffiths, P. C.; Serpell, L. C.; Adams, D. J. *Nanoscale* **2014**, *6*, 13719.
- (7) Awhida, S.; Draper, E. R.; McDonald, T. O.; Adams, D. J. *Journal of Colloid and Interface Science* **2015**, *455*, 24.
- (8) Draper, E. R.; McDonald, T. O.; Adams, D. J. *Chemical Communications* **2015**, *51*, 12827.
- (9) Adams, D. J.; Young, I. *Journal of Polymer Science Part A: Polymer Chemistry* **2008**, *46*, 6082.
- (10) <http://www.cambridgesoft.com/software/overview.aspx>.
- (11) <http://accelrys.com/products/collaborative-science/biovia-pipeline-pilot/>.
- (12) Rogers, D.; Hahn, M. *Journal of Chemical Information and Modeling* **2010**, *50*, 742.
- (13) Team, R. C.; R Foundation for Statistical Computing: 2015.
- (14) Venables, W. N.; Ripley, B. D. *Modern Applied Statistics with S. Fourth Edition.*; Springer, 2002.
- (15) Kuhn, M.; Wing, J.; Weston, S.; Williams, A.; Keefer, C.; Engelhardt, A.; Cooper, T.; Mayer, Z.; Kenkel, B.; Team, R. C.; Benesty, M.; Lescarbeau, R.; Ziem, A.; Scrucra, L. 2015.
- (16) M. Leite, D.; Barbu, E.; J. Pilkington, G.; Lalatsa, A. *Current Topics in Medicinal Chemistry* **2015**, *15*, 2277.
- (17) Osolodkin, D. I.; Radchenko, E. V.; Orlov, A. A.; Voronkov, A. E.; Palyulin, V. A.; Zefirov, N. S. *Expert Opinion on Drug Discovery* **2015**, *10*, 959.
- (18) Lipinski, C. A. *Drug Discovery Today: Technologies* **2004**, *1*, 337.
- (19) Nell, P. G.; Mundt, S. M. *High-Throughput Screening in Drug Discovery, Chapter 8*; Wiley, 2006; Vol. 35.
